# Supplementary material for: Epigenetic Mechanisms Are Involved in the Oncogenic Properties of ZNF518B in Colorectal Cancer
Source: PubMed Central journal article supplement (PMC8004037; doi:10.3390/cancers13061433), 2021-03-21
Supplement: cancers-13-01433-s001.pdf [file cancers-13-01433-s001.pdf]

# Epigenetic mechanisms are involved in the oncogenic properties of *ZNF518B* in colorectal cancer

Francisco Gimeno-Valiente, Ángela L. Riffo-Campos, Luis Torres, Noelia Tarazona, Valentina Gambardella, Andrés Cervantes, Gerardo López-Rodas, Luis Franco and Josefa Castillo

## SUPPLEMENTARY METHODS

### 1. Selection of genomic sequences for ChIP analysis

To select the sequences for ChIP analysis in the five putative target genes, namely, *PADI3*, *ZDHHC2*, *RGS4*, *EFNA5* and *KAT2B*, the genomic region corresponding to the gene was downloaded from Ensembl. Then, zoom was applied to see in detail the promoter, enhancers and regulatory sequences. The details for HCT116 cells were then recovered and the target sequences for factor binding examined. Obviously, there are not data for ZNF518B, but special attention was paid to the target sequences of other zinc-finger containing factors. Finally, the regions that may putatively bind ZNF518B were selected and primers defining amplicons spanning such sequences were searched out. Supplementary Figure S3 gives the location of the amplicons used in each gene.

### 2. Obtaining the raw data and generating the BAM files for *in silico* analysis of the effects of *EHMT2* and *EZH2* silencing

The data of siEZH2 (SRR6384524), siG9a (SRR6384526) and siNon-target (SRR6384521) in HCT116 cell line, were downloaded from SRA (Bioproject PRJNA422822, <https://www.ncbi.nlm.nih.gov/bioproject/>), using SRA-tolkit (<https://ncbi.github.io/sra-tools/>). All data correspond to RNAseq single end.

```
doBasics = TRUE
doAll = FALSE
$ fastq-dump -I --split-files SRR6384524
```

Data quality was checked using the software fastqc (<https://www.bioinformatics.babraham.ac.uk/projects/fastqc/>). The first low quality removing nucleotides were removed using FASTX-Toolkit (<http://hannonlab.cshl.edu/fastxtoolkit/>).

```
$ fastqc HCT116_PBS_siEZH2.fastq
$ fastx_trimmer -i HCT116_PBS_siEZH2.fastq
-o HCT116_PBS_siEZH2_1.fastq -f 15 -Q 33 -v
```

The fastq were mapped using STAR, indexing the human genome version GRCH38.p12.

Then, the resulting SAM files were compressed to BAM format and sorted, using SAMtools (<http://samtools.sourceforge.net/>):

```
$ ./STAR --runMode genomeGenerate --runThreadN 10 --genomeDir
./ --genomeFastaFiles GRCh38.p12.genome.fa
$ ./STAR --genomeDir ./ --runThreadN 10 starIndex --readFilesIn
/home/HCT116_PBS_siEZH2_1.fastq --outFileNamePrefix
/home/HCT116_siEZH2

$ samtools view -S -b HCT116_siEZH2Aligned.out.sam > HCT116_siEZH2.bam
$ samtools sort HCT116_siEZH2.bam -o HCT116_siEZH2_sort.bam
```

The fastq files also were mapped using Bowtie2 (<http://bowtie-bio.sourceforge.net/bowtie2/index.shtml>).

```
$ ./bowtie2-build -f /mnt/sdb1/Bowtie2/GRCh38.p12.genome.fa human
$ ./bowtie2 -x human -U /mnt/sdb1/Fastq/HCT116_PBS_siEZH2_1.fastq -S
siEZH2.sam
$ samtools view -S -b siEZH2.sam > siEZH2.bam
$ samtools sort siEZH2.bam -o siEZH2_sort.bam
```

## 2. Count and matrix generation

The libraries used for the analysis were:

```
library(Rsamtools)
library(GenomicFeatures)
library(GenomicAlignments)
library(org.Hs.eg.db)
library(edgeR)
library(VennDiagram)
```

### 2.1. Generation of the STAR expression matrix

For siG9A in HCT116 cell lines:

```
gtfFile = "gencode.v29.chr_patch_hapl_scaff.annotation.gtf"
txdb = makeTxDbFromGFF(gtfFile, format="gtf")
genes = exonsBy(txdb, by="gene")
indir = getwd()
files = list.files(indir, pattern = '*.bam')
#[1] "HCT116_siG9A_sort.bam" "HCT116_siNontarget_sort.bam"
bamLst = BamFileList(files, index=character(),
                    obeyQname=TRUE)
# Counting reads
siG9A = summarizeOverlaps(features = genes,
                          reads = bamLst,
                          mode="Union",
                          singleEnd=TRUE,
                          ignore.strand=TRUE,
                          fragments=FALSE)

colnames(siG9A)
#[1] "HCT116_siG9a_sort.bam" "HCT116_siNontarget_sort.bam"
SampleName = c("siG9a", "siNon")
Stage = c("siG9a", "siNon")
```

```
colData(siG9a) = DataFrame(SampleName, Stage)
dim(siG9a)
# [1] 64837      2
save(siG9a, file="siG9a.rda")
```

For siEZH2 in HCT116 cell lines:

```
indir = getwd()
files = list.files(indir, pattern = '*.bam')
# [1] "HCT116_siEZH2_sort.bam" "HCT116_siNontarget_sort.bam"
bamLst = BamFileList(files, index=character(),
                     obeyQname=TRUE)
siEZH2 = summarizeOverlaps(features = genes, read=bamLst,
                           mode="Union",
                           singleEnd=TRUE,
                           ignore.strand=TRUE,
                           fragments=FALSE)

colnames(siEZH2)
# [1] "HCT116_siEZH2_sort.bam" "HCT116_siNontarget_sort.bam"
SampleName = c("siEZH2", "siNon")
Stage = c("siEZH2", "siNon")
colData(siEZH2) = DataFrame(SampleName, Stage)
dim(siEZH2)
# [1] 64837      2
save(siEZH2, file="siEZH2.rda")
```

## 2.1. Generation of the Bowtie2 expression matrix

For siEZH2 in HCT116 cell line:

```
gtfFile = "encode.v29.chr_patch_hapl_scaff.annotation.gtf"
txdb = makeTxDbFromGFF(gtfFile, format="gtf")
genes = exonsBy(txdb, by="gene")
indir = getwd()
files = list.files(indir, pattern = '*.bam')
# [1] "siEZH2_sort.bam" "siNonTarget_sort.bam"
bamLst = BamFileList(files, index=character(),
                     obeyQname=TRUE)
siEZH2_Bowtie = summarizeOverlaps(features = genes,
                                   read=bamLst,
                                   mode="Union",
                                   singleEnd=TRUE,
                                   ignore.strand=TRUE,
                                   fragments=FALSE)

colnames(siEZH2_Bowtie)
# [1] "siEZH2_sort.bam" "siNonTarget_sort.bam"
SampleName = c("siEZH2", "siNon")
Stage = c("siEZH2", "siNon")
colData(siEZH2_Bowtie) = DataFrame(SampleName, Stage)
dim(siEZH2_Bowtie)
# [1] 64837      2
save(siEZH2_Bowtie, file="siEZH2_Bowtie.rda")
```

For siG9a in HCT116 cell line:

```
indir = getwd()
files = list.files(indir, pattern = '*.bam')
# [1] "siG9a_sort.bam" "siNonTarget_sort.bam"
bamLst = BamFileList(files, index=character(),
                    obeyQname=TRUE)
siG9a_Bowtie = summarizeOverlaps(features = genes,
                                read=bamLst,
                                mode="Union",
                                singleEnd=TRUE,
                                ignore.strand=TRUE,
                                fragments=FALSE)

colnames(siG9a_Bowtie)
# [1] "siG9a_sort.bam"      "siNonTarget_sort.bam"
SampleName = c("siG9a", "siNon")
Stage = c("siG9a", "siNon")
colData(siG9a_Bowtie) = DataFrame(SampleName, Stage)
dim(siG9a_Bowtie)
# [1] 64837      2
save(siG9a_Bowtie, file="siG9a_Bowtie.rda")
```

### 3. Normalisation and statistical analysis

#### 3.1 STAR-edgeR

The statistical analysis was made according to the user guide of edgeR package (<https://www.bioconductor.org/packages/release/bioc/vignettes/edgeR/inst/doc/edgeRUsersGuide>). In this case, we have one library for each treatment condition. Thus, the biological variability of 0.01 was assigned, as recommended in case of technical replicates.

For siEZH2 in HCT116 cell line, the procedure was:

```
load(file="siEZH2.rda")
# edgeR user guide: 2.11      What to do if you have no replicates
x = assay(siEZH2) group = siEZH2$Stage
y = DGEList(counts=x, group=group)
y = calcNormFactors(y)
y$samples
# group lib.size norm.factors
# Sample1      siEZH2 41941545      0.9808675
# Sample2      siNon 39355314      1.0195057

bcv = 0.01 # recommended by edgeR manual
et = exactTest(y, dispersion=bcv)
write.csv(topTags(et, n=5000, adjust.method="BH",
                 sort.by="PValue", p.value=1),
          file = "siEZH2.csv")
```

For siG9a in HCT116 cell line, the procedure was:

```
load(file="siG9a.rda")
x = assay(siG9a) group = siG9a$Stage
y = GELIST(counts=x, group=group)
```

```

y = calcNormFactors(y)
y$samples
# group lib.size norm.factors
# Sample1 siG9a 33123918 1.0065409
# Sample2 siNon 39355314 0.9935016
bcv = 0.01
et = exactTest(y, dispersion=bcv)
write.csv(topTags(et, n=5000, adjust.method="BH",
                 sort.by="PValue", p.value=1),
          file = "siG9a.csv")

```

### 3.2. Bowtie2-edgeR

For siEZH2 in HCT116 cell lines, the procedure was:

```

load(file="siEZH2_Bowtie.rda")
x = assay(siEZH2_Bowtie) group = siEZH2_Bowtie$Stage
y = DGEList(counts=x, group=group)
y = calcNormFactors(y)
y$samples
# group lib.size norm.factors
# Sample1 siEZH2 275877230.9850405
# Sample2 siNon 260485281.0151867
bcv = 0.01
et = exactTest(y, dispersion=bcv)
write.csv(topTags(et, n=5000, adjust.method="BH",
                 sort.by="PValue", p.value=1),
          file = "siEZH2_Bowtie.csv")

```

For siG9a in HCT116 cell line, the procedure was:

```

load(file="siG9a_Bowtie.rda")
x = assay(siG9a_Bowtie) group = siG9a_Bowtie$Stage
y = DGEList(counts=x, group=group)
y = calcNormFactors(y)
y$samples
# group lib.size norm.factors
# Sample1 siG9a 21498497 1.0149663
# Sample2 siNon 26048528 0.9852544
bcv = 0.01
et = exactTest(y, dispersion=bcv)
write.csv(topTags(et, n=5000, adjust.method="BH",
                 sort.by="PValue", p.value=1),
          file = "siG9a_Bowtie.csv")

```

## 4. Contrasting the *in silico* results with those experimentally obtained in HCT116 cells after knocking-down *ZNF518B*

```

Lista siGenes = read.csv(file= "lista_genes.csv",
                        header = TRUE, sep=",")

```

```

area1 = intersect(Lista_siGenes$siEZH2,Lista_siGenes$siEZH2) length(area1)
# 433

area2 = intersect(Lista_siGenes$siG9A,Lista_siGenes$siG9A) length(area2)
# 190

area3 = intersect(Lista_siGenes$siZNF518B,Lista_siGenes$siZNF518B) length(area3)
# 580

n12 = intersect(area1, area2)
length(n12)
# 90
n23 = intersect(area2, area3)
length(n23)
# 17
n13 = intersect(area1, area3)
length(n13)
# 41
n123 = intersect(intersect(area1, area2), area3)
length(n123)
# 9

library(VennDiagram)

## Loading required package: grid

## Loading required package: futile.logger

draw.triple.venn(area1= 433, area2= 190, area3= 580,
                 n12= 90, n23= 17, n13= 41, n123= 9,
                 category = c("HCT116 siEZH2", "HCT116 siEHMT2",
                              "HCT116 siZNF518B"),
                 lty = "blank", sep.dist = 1,
                 fill = c("red", "green", "Blue"), euler.d = TRUE
                 scaled = TRUE, rotation.degree = 10, cex = 1, cat.cex = 1,
                 cat.dist = 0.1)

```

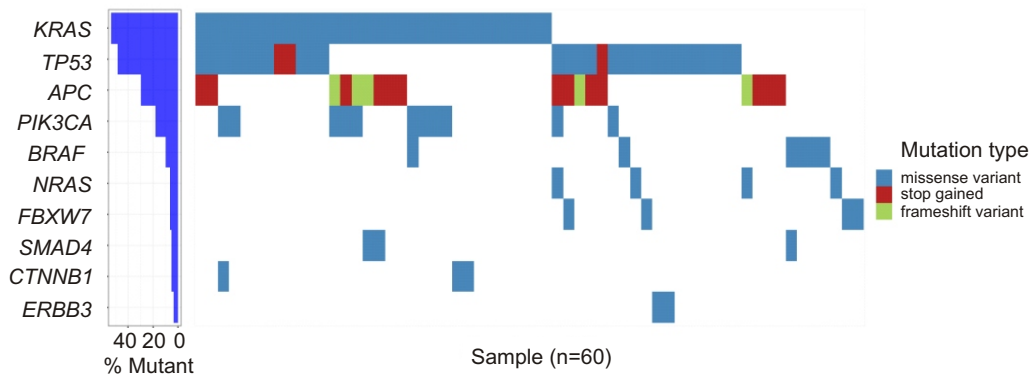

**Figure S1.** Next-Generation Sequencing for somatic mutations in 60 out of the 66 patients cohort. The percent occurrence and the nature of the different mutations are indicated.

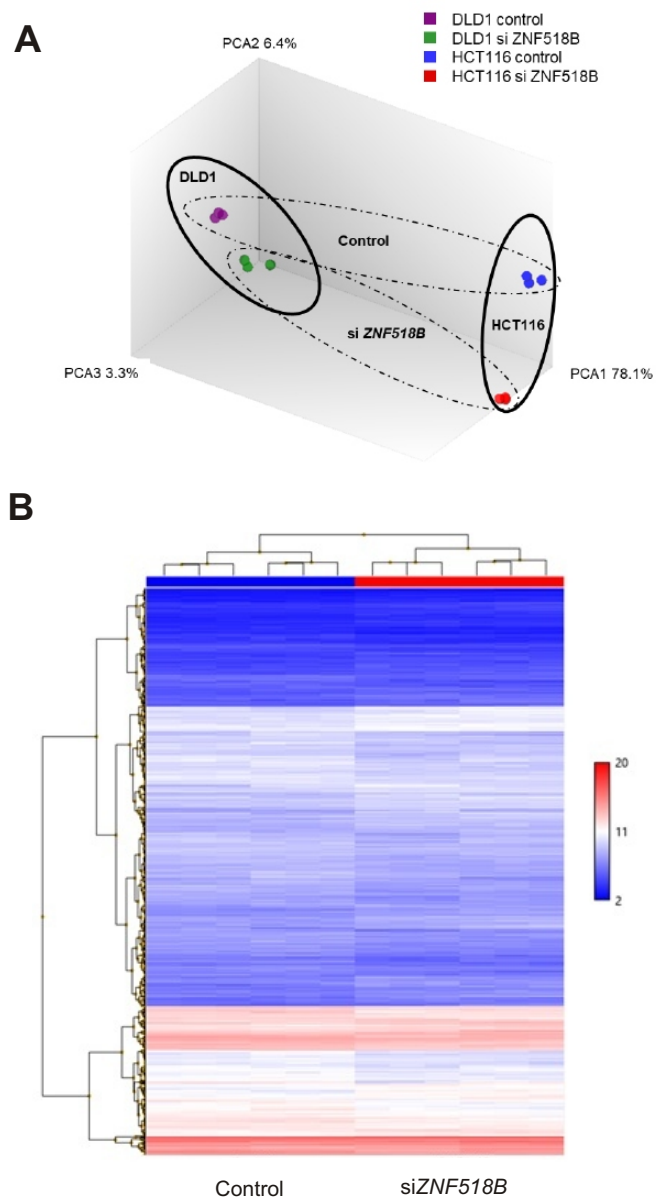

**Figure S2.** Global analysis of the transcriptomic profile of normal DLD1 and HCT116 cell lines and of cells with silenced *ZNF518B*. The principal component analysis (A) and the heat map (B) are shown.



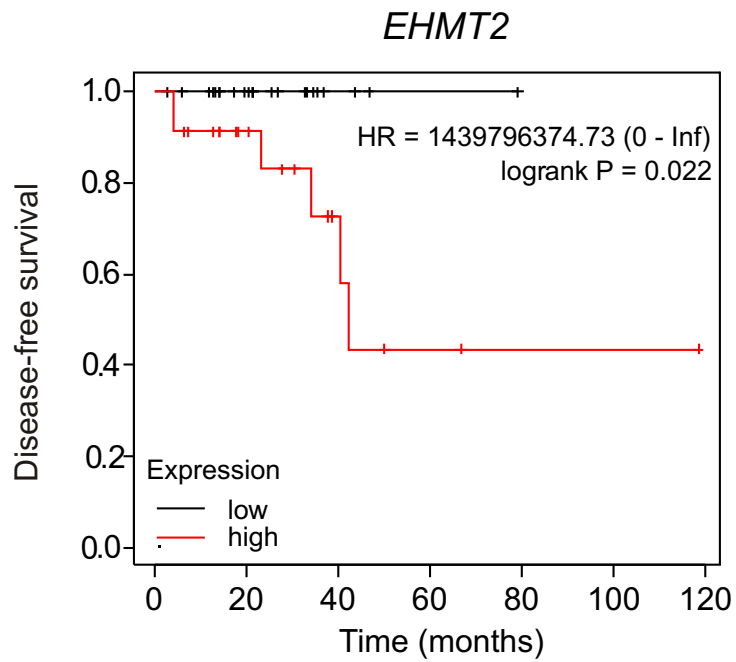

**Figure S3.** Influence of the level of *EHMT2* transcription on the disease-free survival of CRC patients. The Kaplan-Meier curve was obtained as described in Materials and Methods, with the data retrieved from TCGA database

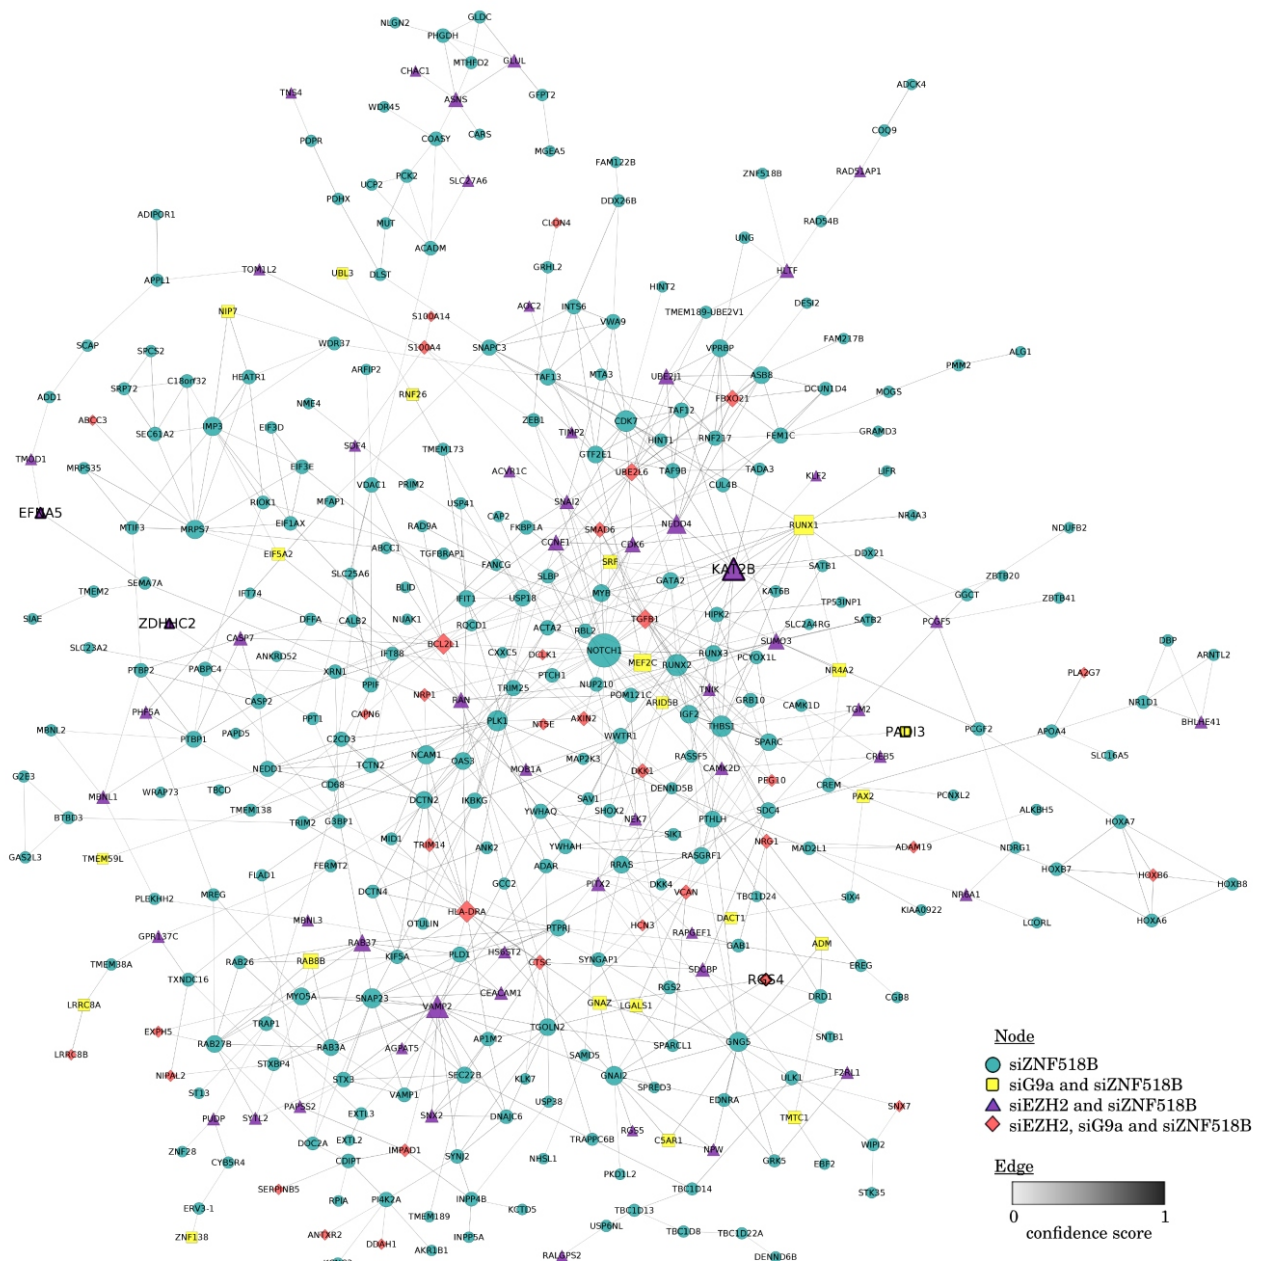

**Figure S4.** Protein-protein interaction network for genes affected by *ZNF518B*, *EZH2* and *EHMT2*. The network includes 370 nodes and 739 interactions. The size of the nodes is proportional to the number of connections. Nodes labelled with large lettering indicate the five genes analysed by ChIP. The shading intensity of the edges indicates confidence score interaction from 0 to 1.

## PADI3

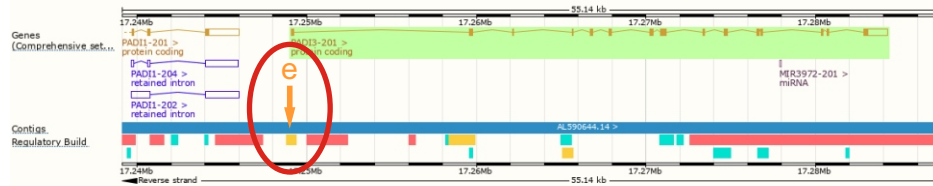

## ZDHHC2

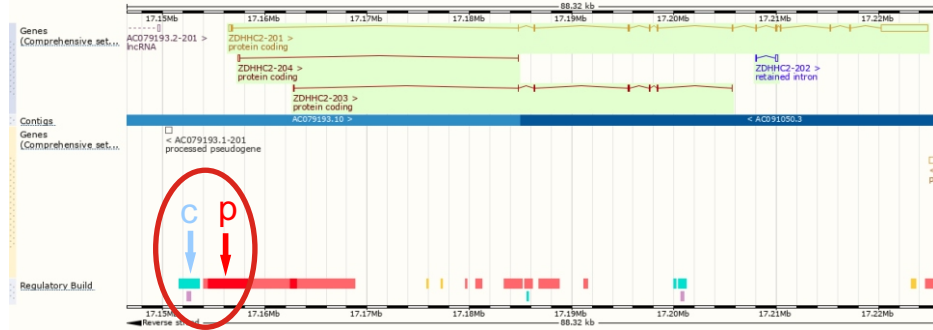

## RGS4

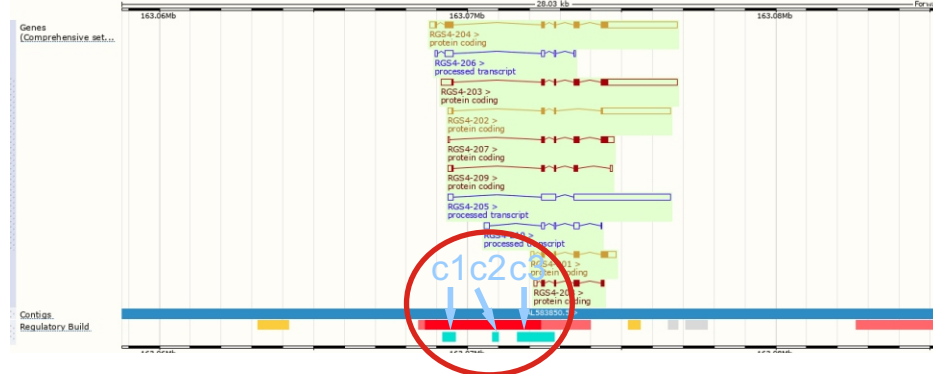

## EFNA5

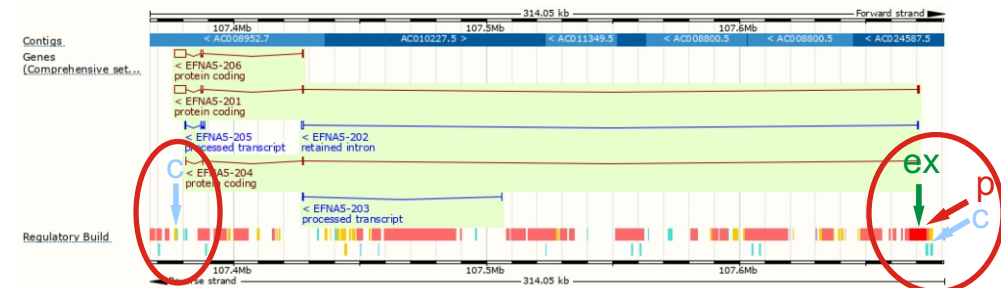

## KAT2B

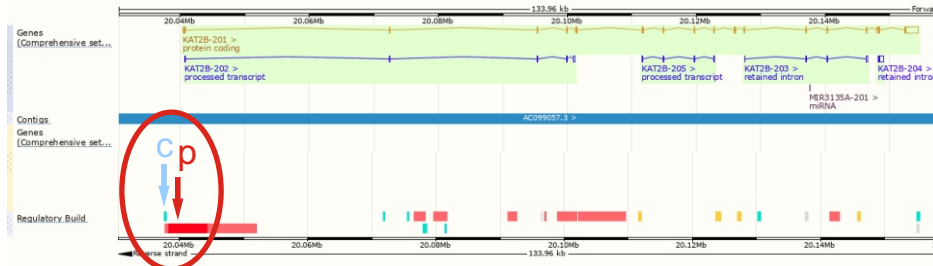

**Figure S5.** Genomic regions selected for ChIP analysis. Gene map displays were downloaded from Ensembl database ([www.ensembl.org](http://www.ensembl.org)) and the amplicons used for qPCR analysis of ChIP data were selected as indicated in Supplementary Methods. The location of amplicons is given by coloured arrows, encircled by red ovals and labelled as p (promoters), e (enhancers), c (CTCF control sequences), ex (exons). Note that *EFNA5* is transcribed from the reverse strand.

**Supplementary Table S1.** Clinicopathological characteristics of the patients' cohort (n=66)

| <b>Patients' characteristics</b> |     | N (%)     |
|----------------------------------|-----|-----------|
| <i>T stage</i>                   | 1   | 1 (1.5)   |
|                                  | 2   | 5 (7.6)   |
|                                  | 3   | 49 (74.2) |
|                                  | 4   | 11 (16.7) |
| <i>N stage</i>                   | Yes | 27 (40.9) |
|                                  | No  | 39 (59.1) |
| <i>AJCC Stage</i>                | I   | 4 (6.1)   |
|                                  | II  | 35 (53.0) |
|                                  | III | 27 (40.9) |
| <i>Vascular invasion</i>         | Yes | 21 (31.8) |
|                                  | No  | 45 (68.2) |
| <i>Perineural invasion</i>       | Yes | 12 (18.2) |
|                                  | No  | 54 (81.8) |
| <i>Relapse</i>                   | Yes | 10 (15.2) |
|                                  | No  | 56 (84.8) |
| <i>CMS stage</i>                 | 1   | 15 (22.7) |
|                                  | 2   | 13 (19.7) |
|                                  | 3   | 8 (12.1)  |
|                                  | 4   | 25 (37.9) |
|                                  | ND  | 5 (7.6)   |

ND: non-determined.

**Supplementary Table S2.** Genes affected in DLD1 cells by knocking-down the *ZNF518B* gene, as recovered from the Clariom-S assay

| ID                | Gene Symbol           | LogFC | P-value  | FDR      |
|-------------------|-----------------------|-------|----------|----------|
| TC0X00009007.hg.1 | <i>PUDP</i>           | 2.22  | 3.46E-07 | 0.0003   |
| TC2000009204.hg.1 | <i>TOMM34</i>         | 2.05  | 6.55E-09 | 4.68E-05 |
| TC0100007747.hg.1 | <i>GJB3</i>           | 1.9   | 1.47E-06 | 0.0005   |
| TC0600008760.hg.1 | <i>PM20D2</i>         | 1.85  | 5.85E-07 | 0.0003   |
| TC0900012024.hg.1 | <i>CLIC3</i>          | 1.83  | 1.22E-07 | 0.0002   |
| TC0900007576.hg.1 | <i>ANXA1</i>          | 1.75  | 4.22E-09 | 4.68E-05 |
| TC1200009800.hg.1 | <i>SLC2A3</i>         | 1.64  | 2.37E-07 | 0.0003   |
| TC0400010048.hg.1 | <i>ZNF518B</i>        | 1.62  | 3.52E-07 | 0.0003   |
| TC1200010788.hg.1 | <i>SPRYD3</i>         | 1.6   | 4.97E-07 | 0.0003   |
| TC0600011448.hg.1 | <i>LY6G6C</i>         | 1.6   | 3.44E-06 | 0.0008   |
| TC0200006687.hg.1 | <i>HPCAL1</i>         | 1.59  | 8.40E-05 | 0.0049   |
| TC0100012278.hg.1 | <i>SCCPDH</i>         | 1.59  | 1.51E-06 | 0.0005   |
| TC2000009218.hg.1 | <i>SDC4</i>           | 1.57  | 1.93E-08 | 9.19E-05 |
| TC1100008037.hg.1 | <i>OVOL1</i>          | 1.56  | 2.60E-06 | 0.0007   |
| TC1700007102.hg.1 | <i>ALKBH5</i>         | 1.49  | 6.89E-08 | 0.0001   |
| TC0200011093.hg.1 | <i>ALPP</i>           | 1.48  | 1.04E-06 | 0.0004   |
| TC1200009796.hg.1 | <i>SLC2A14</i>        | 1.46  | 1.61E-06 | 0.0005   |
| TC0600011134.hg.1 | <i>HIST1H4D</i>       | 1.45  | 1.27E-05 | 0.0017   |
| TC2200009257.hg.1 | <i>TCN2</i>           | 1.45  | 3.01E-05 | 0.0029   |
| TC1700006464.hg.1 | <i>FAM57A</i>         | 1.44  | 1.43E-06 | 0.0005   |
| TC1000008891.hg.1 | <i>DUSP5</i>          | 1.43  | 2.97E-07 | 0.0003   |
| TC1200008591.hg.1 | <i>ACTR6</i>          | 1.43  | 7.64E-06 | 0.0012   |
| TC0500012388.hg.1 | <i>DPYSL3</i>         | 1.41  | 0.0043   | 0.0548   |
| TC1600007448.hg.1 | <i>CORO1A</i>         | 1.4   | 0.0001   | 0.0060   |
| TC1700011808.hg.1 | <i>ST6GALNAC2</i>     | 1.4   | 0.0007   | 0.0175   |
| TC0600011234.hg.1 | <i>HIST1H4L</i>       | 1.39  | 3.27E-06 | 0.0008   |
| TC1600010409.hg.1 | <i>BBS2</i>           | 1.39  | 4.87E-05 | 0.0036   |
| TC0700008430.hg.1 | <i>SDHAF3</i>         | 1.38  | 0.0003   | 0.0095   |
| TC1900011382.hg.1 | <i>MYADM</i>          | 1.37  | 4.35E-06 | 0.0009   |
| TC0100011533.hg.1 | <i>ATF3</i>           | 1.36  | 5.98E-07 | 0.0003   |
| TC1600011378.hg.1 | <i>MVP; PAGR1</i>     | 1.36  | 9.45E-07 | 0.0004   |
| TC1400009248.hg.1 | <i>DLGAP5</i>         | 1.36  | 3.28E-06 | 0.0008   |
| TC0600007613.hg.1 | <i>HSPA1A; HSPA1B</i> | 1.34  | 2.52E-07 | 0.0003   |
| TC0100015336.hg.1 | <i>BCL2L15</i>        | 1.34  | 4.32E-06 | 0.0009   |
| TC0X00007744.hg.1 | <i>SH3BGRL</i>        | 1.34  | 6.18E-07 | 0.0003   |
| TC1700008897.hg.1 | <i>MRPS7</i>          | 1.31  | 0.0006   | 0.0161   |
| TC0200011107.hg.1 | <i>EFHD1</i>          | 1.31  | 0.0011   | 0.0238   |
| TC0600007311.hg.1 | <i>HMGN4</i>          | 1.3   | 5.13E-07 | 0.0003   |
| TC2000009392.hg.1 | <i>B4GALT5</i>        | 1.29  | 4.12E-06 | 0.0009   |
| TC1800009222.hg.1 | <i>RNF125</i>         | 1.29  | 6.54E-05 | 0.0043   |
| TC0500012166.hg.1 | <i>CDC25C</i>         | 1.29  | 8.61E-06 | 0.0013   |
| TC0900009930.hg.1 | <i>FANCG</i>          | 1.29  | 8.38E-05 | 0.0049   |

|                         |                       |      |          |        |
|-------------------------|-----------------------|------|----------|--------|
| TC1100009248.hg.1       | <i>RNF26</i>          | 1.28 | 1.05E-06 | 0.0004 |
| TC0600011130.hg.1       | <i>HIST1H4C</i>       | 1.28 | 0.0017   | 0.0310 |
| TC1500007062.hg.1       | <i>CKMT1B; CKMT1A</i> | 1.27 | 5.34E-07 | 0.0003 |
| TC0X00008833.hg.1       | <i>FAM50A</i>         | 1.27 | 5.28E-05 | 0.0038 |
| TC1500007034.hg.1       | <i>SNAP23</i>         | 1.26 | 4.01E-06 | 0.0009 |
| TC1100006796.hg.1       | <i>AKIP1</i>          | 1.26 | 2.03E-05 | 0.0023 |
| TC1700008882.hg.1       | <i>KCTD2</i>          | 1.25 | 2.14E-06 | 0.0006 |
| TC0200015214.hg.1       | <i>OSGEPL1</i>        | 1.25 | 0.0003   | 0.0108 |
| TC1000008798.hg.1       | <i>SFR1</i>           | 1.24 | 1.60E-05 | 0.0019 |
| TC0100013483.hg.1       | <i>TAF12</i>          | 1.23 | 8.41E-06 | 0.0013 |
| TC1600011115.hg.1       | <i>EMC8</i>           | 1.22 | 0.0003   | 0.0095 |
| TC0100014776.hg.1       | <i>DDAH1</i>          | 1.22 | 4.71E-05 | 0.0036 |
| TC0100006982.hg.1       | <i>EFHD2</i>          | 1.22 | 3.38E-05 | 0.0030 |
| TC0500012486.hg.1       | <i>DCTN4</i>          | 1.21 | 4.25E-06 | 0.0009 |
| TC0400012251.hg.1       | <i>C4orf46</i>        | 1.2  | 2.47E-06 | 0.0007 |
| TC0500012842.hg.1       | <i>DUSP1</i>          | 1.2  | 0.0002   | 0.0071 |
| TC1600010732.hg.1       | <i>NQO1</i>           | 1.19 | 1.11E-06 | 0.0004 |
| TC1900011470.hg.1       | <i>UBE2S</i>          | 1.19 | 1.90E-05 | 0.0022 |
| TC0100008101.hg.1       | <i>KIF2C</i>          | 1.19 | 0.0001   | 0.0067 |
| TC0200015127.hg.1       | <i>PDE1A</i>          | 1.19 | 0.0002   | 0.0073 |
| TC2100008297.hg.1       | <i>SIK1</i>           | 1.19 | 6.13E-06 | 0.0011 |
| TSUnmapped00000400.hg.1 | <i>SERTAD4</i>        | 1.18 | 0.0001   | 0.0057 |
| TC1700011892.hg.1       | <i>TK1</i>            | 1.18 | 1.15E-06 | 0.0004 |
| TC0500007966.hg.1       | <i>XRCC4</i>          | 1.18 | 2.95E-05 | 0.0028 |
| TC0100013293.hg.1       | <i>ID3</i>            | 1.18 | 0.0001   | 0.0060 |
| TC1200008675.hg.1       | <i>TXNRD1</i>         | 1.18 | 4.38E-06 | 0.0009 |
| TC1200007051.hg.1       | <i>PYROXD1</i>        | 1.18 | 2.37E-06 | 0.0006 |
| TC0100009723.hg.1       | <i>FAM72D</i>         | 1.18 | 0.0010   | 0.0225 |
| TC1400007706.hg.1       | <i>FOS</i>            | 1.17 | 2.35E-05 | 0.0026 |
| TC1000007990.hg.1       | <i>DDIT4</i>          | 1.17 | 0.0002   | 0.0085 |
| TC0200016366.hg.1       | <i>THAP4</i>          | 1.17 | 0.0002   | 0.0092 |
| TC0700006735.hg.1       | <i>SCIN</i>           | 1.17 | 0.0006   | 0.0161 |
| TC0X00009386.hg.1       | <i>SRPX</i>           | 1.16 | 5.90E-05 | 0.0041 |
| TC2100008252.hg.1       | <i>TMPRSS3</i>        | 1.16 | 0.0007   | 0.0175 |
| TC1500009130.hg.1       | <i>RHOV</i>           | 1.16 | 0.0128   | 0.1059 |
| TC1100009450.hg.1       | <i>DCPS</i>           | 1.15 | 0.0006   | 0.0159 |
| TC1600007806.hg.1       | <i>HEATR3</i>         | 1.15 | 0.0001   | 0.0057 |
| TC0100018186.hg.1       | <i>NBL1</i>           | 1.14 | 0.0001   | 0.0063 |
| TC0500006730.hg.1       | <i>CCT5</i>           | 1.14 | 2.12E-06 | 0.0006 |
| TC0200009687.hg.1       | <i>ARL6IP6</i>        | 1.13 | 0.0002   | 0.0077 |
| TC1600006976.hg.1       | <i>ERCC4</i>          | 1.13 | 4.88E-05 | 0.0036 |
| TC0900011432.hg.1       | <i>RBM18</i>          | 1.13 | 7.52E-05 | 0.0047 |
| TC1700009731.hg.1       | <i>GAS7</i>           | 1.13 | 0.0001   | 0.0053 |
| TC0600007263.hg.1       | <i>HIST1H4A</i>       | 1.13 | 0.0013   | 0.0274 |
| TC1100009817.hg.1       | <i>PHLDA2</i>         | 1.12 | 8.22E-07 | 0.0004 |
| TC0700011710.hg.1       | <i>SLC25A40</i>       | 1.12 | 5.27E-06 | 0.0010 |

|                   |                       |      |          |        |
|-------------------|-----------------------|------|----------|--------|
| TC0600007616.hg.1 | <i>HSPA1B; HSPA1A</i> | 1.12 | 1.02E-05 | 0.0014 |
| TC0X00009124.hg.1 | <i>PIGA</i>           | 1.12 | 1.58E-05 | 0.0019 |
| TC0200009065.hg.1 | <i>DBI</i>            | 1.12 | 2.75E-06 | 0.0007 |
| TC0X00009486.hg.1 | <i>MAOB</i>           | 1.12 | 5.55E-05 | 0.0039 |
| TC1200011567.hg.1 | <i>TMCC3; MIR7844</i> | 1.11 | 0.0013   | 0.0264 |
| TC0100017216.hg.1 | <i>NEK2</i>           | 1.11 | 1.74E-05 | 0.0020 |
| TC0800009856.hg.1 | <i>EGR3</i>           | 1.11 | 0.0008   | 0.0191 |
| TC0300012145.hg.1 | <i>FSTL1; MIR198</i>  | 1.11 | 0.0033   | 0.0465 |
| TC1400010730.hg.1 | <i>EGLN3</i>          | 1.11 | 0.0001   | 0.0068 |
| TC1100008652.hg.1 | <i>TMEM126A</i>       | 1.11 | 0.0026   | 0.0402 |
| TC1000007272.hg.1 | <i>CREM</i>           | 1.1  | 0.0241   | 0.1540 |
| TC0600013433.hg.1 | <i>SF3B5</i>          | 1.09 | 0.0004   | 0.0116 |
| TC1100012667.hg.1 | <i>OR8B3</i>          | 1.09 | 8.50E-05 | 0.0049 |
| TC0100015332.hg.1 | <i>RSBN1</i>          | 1.08 | 3.07E-05 | 0.0029 |
| TC2200006540.hg.1 | <i>USP18</i>          | 1.08 | 4.70E-05 | 0.0036 |
| TC2000009884.hg.1 | <i>AP5S1</i>          | 1.08 | 0.0064   | 0.0693 |
| TC1600007887.hg.1 | <i>RBL2</i>           | 1.07 | 8.86E-05 | 0.0050 |
| TC0600006524.hg.1 | <i>FOXQ1</i>          | 1.07 | 2.54E-05 | 0.0026 |
| TC1200010264.hg.1 | <i>IPO8</i>           | 1.07 | 3.15E-05 | 0.0029 |
| TC0500008777.hg.1 | <i>KIF20A</i>         | 1.07 | 3.26E-05 | 0.0030 |
| TC1900009204.hg.1 | <i>MOB3A</i>          | 1.07 | 3.79E-05 | 0.0031 |
| TC1700010647.hg.1 | <i>KRTAP3-1</i>       | 1.07 | 4.52E-05 | 0.0035 |
| TC1600009063.hg.1 | <i>MRPS34</i>         | 1.07 | 5.07E-05 | 0.0037 |
| TC0500009490.hg.1 | <i>BNIP1</i>          | 1.07 | 0.0002   | 0.0090 |
| TC1200007653.hg.1 | <i>NR4A1</i>          | 1.07 | 0.0002   | 0.0092 |
| TC0500011984.hg.1 | <i>HINT1</i>          | 1.06 | 3.30E-05 | 0.0030 |
| TC0200008262.hg.1 | <i>RNF181</i>         | 1.06 | 6.13E-05 | 0.0042 |
| TC1000008482.hg.1 | <i>CEP55</i>          | 1.06 | 0.0010   | 0.0232 |
| TC0100010152.hg.1 | <i>LMNA</i>           | 1.06 | 1.29E-05 | 0.0017 |
| TC1300007592.hg.1 | <i>NDFIP2</i>         | 1.06 | 3.11E-05 | 0.0029 |
| TC0700006618.hg.1 | <i>WIPI2</i>          | 1.06 | 4.09E-05 | 0.0033 |
| TC0X00009018.hg.1 | <i>PNPLA4</i>         | 1.06 | 8.14E-05 | 0.0049 |
| TC0800011132.hg.1 | <i>GEM</i>            | 1.06 | 8.50E-05 | 0.0049 |
| TC2000007830.hg.1 | <i>TFAP2C</i>         | 1.06 | 0.0001   | 0.0065 |
| TC0900012189.hg.1 | <i>TMEM141</i>        | 1.06 | 0.0005   | 0.0148 |
| TC0100017073.hg.1 | <i>SLC45A3</i>        | 1.06 | 0.0031   | 0.0444 |
| TC0600011138.hg.1 | <i>HIST1H1D</i>       | 1.06 | 0.0041   | 0.0530 |
| TC1100011338.hg.1 | <i>CDK2AP2</i>        | 1.05 | 2.58E-05 | 0.0026 |
| TC0100018233.hg.1 | <i>FPGT</i>           | 1.05 | 3.01E-05 | 0.0029 |
| TC1200007147.hg.1 | <i>ARNTL2</i>         | 1.05 | 3.88E-05 | 0.0032 |
| TC1900008689.hg.1 | <i>PPP2R1A</i>        | 1.05 | 0.0002   | 0.0079 |
| TC0900011655.hg.1 | <i>ZER1</i>           | 1.05 | 6.75E-05 | 0.0044 |
| TC0500012039.hg.1 | <i>ZCCHC10</i>        | 1.05 | 0.0008   | 0.0196 |
| TC0X00006799.hg.1 | <i>SAT1</i>           | 1.05 | 4.75E-06 | 0.0010 |
| TC0100017172.hg.1 | <i>IRF6</i>           | 1.05 | 1.00E-05 | 0.0014 |
| TC2000007083.hg.1 | <i>ID1</i>            | 1.05 | 4.46E-05 | 0.0035 |

|                         |                            |       |          |        |
|-------------------------|----------------------------|-------|----------|--------|
| TC0600011349.hg.1       | <i>RNF39</i>               | 1.04  | 0.0093   | 0.0853 |
| TC0600007377.hg.1       | <i>HIST1H2BM</i>           | 1.04  | 2.38E-05 | 0.0026 |
| TC1200011543.hg.1       | <i>PGAM1</i>               | 1.04  | 9.83E-05 | 0.0053 |
| TC0800007362.hg.1       | <i>PLEKHA2</i>             | 1.04  | 0.0004   | 0.0129 |
| TC0100015872.hg.1       | <i>S100A14</i>             | 1.04  | 0.0005   | 0.0148 |
| TC1200006874.hg.1       | <i>BORCS5</i>              | 1.04  | 0.0014   | 0.0279 |
| TC1500007174.hg.1       | <i>EID1</i>                | 1.04  | 1.75E-05 | 0.0020 |
| TC0200013257.hg.1       | <i>TGOLN2</i>              | 1.04  | 0.0002   | 0.0084 |
| TC2200008425.hg.1       | <i>LIF</i>                 | 1.04  | 0.0483   | 0.2293 |
| TC1500007067.hg.1       | <i>CKMT1A</i>              | 1.04  | 0.0005   | 0.0136 |
| TC0X00009650.hg.1       | <i>WDR45; PRAF2</i>        | 1.03  | 0.0013   | 0.0264 |
| TC0300014064.hg.1       | <i>PFN2</i>                | 1.03  | 3.64E-05 | 0.0030 |
| TC0400009525.hg.1       | <i>ANKRD37</i>             | 1.03  | 0.0006   | 0.0169 |
| TC0700012812.hg.1       | <i>MKRN1</i>               | 1.03  | 8.10E-06 | 0.0013 |
| TC0700013362.hg.1       | <i>MRPS17</i>              | 1.02  | 0.0078   | 0.0773 |
| TC1100007003.hg.1       | <i>LDHA</i>                | 1.02  | 5.64E-06 | 0.0011 |
| TC0200010801.hg.1       | <i>RQCD1</i>               | 1.02  | 1.64E-05 | 0.0019 |
| TC1700012189.hg.1       | <i>SENP3</i>               | 1.02  | 8.78E-05 | 0.0050 |
| TC0100015943.hg.1       | <i>DPM3</i>                | 1.02  | 0.0008   | 0.0207 |
| TC1700009219.hg.1       | <i>RAC3</i>                | 1.02  | 0.0035   | 0.0480 |
| TC0300013835.hg.1       | <i>TEX264</i>              | 1.01  | 0.0028   | 0.0426 |
| TC0800007766.hg.1       | <i>RAB2A</i>               | 1.01  | 9.38E-06 | 0.0014 |
| TC1700009394.hg.1       | <i>PRPF8</i>               | 1.01  | 3.56E-05 | 0.0030 |
| TC0500007911.hg.1       | <i>SPZ1</i>                | 1.01  | 0.0036   | 0.0488 |
| TC0600011135.hg.1       | <i>HIST1H3D; HIST1H2Ai</i> | 1.01  | 0.0002   | 0.0082 |
| TC0100013674.hg.1       | <i>DLGAP3</i>              | 1.01  | 0.0015   | 0.0289 |
| TC1200011251.hg.1       | <i>TSPAN8</i>              | 1     | 1.00E-05 | 0.0014 |
| TC0100011397.hg.1       | <i>C4BPB</i>               | 1     | 0.0003   | 0.0109 |
| TC1200006649.hg.1       | <i>TPI1</i>                | 0.99  | 9.49E-05 | 0.0052 |
| TC1700012361.hg.1       | <i>CDRT1</i>               | -1    | 0.0003   | 0.0107 |
| TC0600007241.hg.1       | <i>LRRC16A</i>             | -1    | 0.0114   | 0.0984 |
| TC1100011184.hg.1       | <i>SF1</i>                 | -1    | 0.0004   | 0.0120 |
| TC0100015947.hg.1       | <i>THBS3</i>               | -1.01 | 2.95E-05 | 0.0028 |
| TC1000006796.hg.1       | <i>SEC61A2</i>             | -1.01 | 3.41E-05 | 0.0030 |
| TSUnmapped00000401.hg.1 | <i>INPP5D</i>              | -1.01 | 0.0005   | 0.0147 |
| TC1700010700.hg.1       | <i>DNAJC7</i>              | -1.01 | 0.0013   | 0.0269 |
| TC0800006975.hg.1       | <i>BMP1</i>                | -1.01 | 0.0003   | 0.0110 |
| TSUnmapped00000106.hg.1 | <i>LRP6</i>                | -1.01 | 0.0010   | 0.0231 |
| TC1200007809.hg.1       | <i>GDF11</i>               | -1.01 | 0.0017   | 0.0315 |
| TC0200010253.hg.1       | <i>ANKAR</i>               | -1.01 | 5.13E-05 | 0.0037 |
| TC1100011742.hg.1       | <i>KCTD21</i>              | -1.02 | 4.37E-05 | 0.0034 |
| TC0600007158.hg.1       | <i>SOX4</i>                | -1.02 | 2.30E-05 | 0.0025 |
| TC0100009646.hg.1       | <i>NBPF26</i>              | -1.02 | 0.0003   | 0.0110 |
| TC1200006454.hg.1       | <i>WNK1</i>                | -1.02 | 0.0005   | 0.0138 |
| TC1100008330.hg.1       | <i>IL18BP</i>              | -1.02 | 4.00E-06 | 0.0009 |
| TC2000006736.hg.1       | <i>SPTLC3</i>              | -1.02 | 3.73E-05 | 0.0031 |



|                         |                        |       |          |        |
|-------------------------|------------------------|-------|----------|--------|
| TC2200007493.hg.1       | <i>MEI1</i>            | -1.02 | 6.08E-05 | 0.0041 |
| TC1800006897.hg.1       | <i>LAMA3</i>           | -1.03 | 3.31E-05 | 0.0030 |
| TC0100009101.hg.1       | <i>ABCD3</i>           | -1.03 | 0.0159   | 0.1209 |
| TC0900006583.hg.1       | <i>UHRF2</i>           | -1.03 | 0.0002   | 0.0074 |
| TC0300011364.hg.1       | <i>CADPS</i>           | -1.03 | 0.0006   | 0.0161 |
| TC0200009967.hg.1       | <i>DLX1</i>            | -1.03 | 0.0270   | 0.1636 |
| TC0X00007573.hg.1       | <i>OGT</i>             | -1.03 | 1.29E-05 | 0.0017 |
| TC0600011173.hg.1       | <i>GUSBP2</i>          | -1.03 | 1.81E-05 | 0.0021 |
| TC2000008516.hg.1       | <i>SNX5</i>            | -1.03 | 0.0109   | 0.0956 |
| TC0300007117.hg.1       | <i>ENTPD3</i>          | -1.04 | 0.0004   | 0.0136 |
| TC1900007543.hg.1       | <i>ZNF257</i>          | -1.04 | 0.0015   | 0.0287 |
| TC1100009667.hg.1       | <i>ANO9</i>            | -1.04 | 9.09E-05 | 0.0051 |
| TC0200008803.hg.1       | <i>GCC2</i>            | -1.04 | 0.0007   | 0.0171 |
| TC1700011919.hg.1       | <i>CEP295NL; TIMP2</i> | -1.04 | 2.68E-06 | 0.0007 |
| TC1700007319.hg.1       | <i>WSB1</i>            | -1.04 | 1.28E-05 | 0.0017 |
| TC0500009061.hg.1       | <i>PCYOX1L</i>         | -1.04 | 2.76E-05 | 0.0027 |
| TC0500009423.hg.1       | <i>NPM1</i>            | -1.04 | 8.46E-05 | 0.0049 |
| TC0200015893.hg.1       | <i>DOCK10</i>          | -1.04 | 0.0003   | 0.0108 |
| TSUnmapped00000725.hg.1 | <i>CCDC84</i>          | -1.04 | 0.0004   | 0.0123 |
| TC0800011566.hg.1       | <i>RAD21</i>           | -1.04 | 0.0061   | 0.0680 |
| TC0500013247.hg.1       | <i>PCDHB14</i>         | -1.04 | 0.0072   | 0.0742 |
| TC1700010314.hg.1       | <i>EVI2A; EVI2B</i>    | -1.04 | 0.0323   | 0.1817 |
| TC0700011554.hg.1       | <i>PMS2P3</i>          | -1.05 | 1.05E-06 | 0.0004 |
| TC0400012854.hg.1       | <i>TMEM144</i>         | -1.05 | 0.0004   | 0.0122 |
| TC0600013126.hg.1       | <i>PTPRK</i>           | -1.05 | 6.05E-06 | 0.0011 |
| TC0200016319.hg.1       | <i>ANKMY1</i>          | -1.05 | 1.43E-05 | 0.0018 |
| TC0600014256.hg.1       | <i>GABBR1</i>          | -1.05 | 3.32E-05 | 0.0030 |
| TC1200010839.hg.1       | <i>ITGA5</i>           | -1.05 | 1.05E-05 | 0.0014 |
| TC0700009065.hg.1       | <i>CCDC136</i>         | -1.05 | 0.0001   | 0.0059 |
| TC0200008462.hg.1       | <i>PROM2</i>           | -1.05 | 0.0010   | 0.0234 |
| TC0200007200.hg.1       | <i>LTBP1</i>           | -1.06 | 2.96E-05 | 0.0028 |
| TC0600011823.hg.1       | <i>TRERF1</i>          | -1.06 | 3.42E-05 | 0.0030 |
| TC1100007675.hg.1       | <i>RTN4RL2</i>         | -1.06 | 5.50E-05 | 0.0039 |
| TC0200007908.hg.1       | <i>ANTXR1</i>          | -1.06 | 0.0008   | 0.0190 |
| TC0400008183.hg.1       | <i>BMPR1B</i>          | -1.06 | 0.0021   | 0.0358 |
| TC1800008750.hg.1       | <i>TCF4</i>            | -1.06 | 0.0086   | 0.0822 |
| TC1200012758.hg.1       | <i>TAS2R14</i>         | -1.06 | 0.0186   | 0.1345 |
| TC1200007535.hg.1       | <i>CACNB3</i>          | -1.06 | 2.68E-05 | 0.0027 |
| TC0600009256.hg.1       | <i>DCBLD1</i>          | -1.06 | 0.0006   | 0.0156 |
| TC1400009579.hg.1       | <i>ADAM20</i>          | -1.06 | 0.0018   | 0.0325 |
| TC1600011355.hg.1       | <i>NPIPA1</i>          | -1.07 | 9.52E-06 | 0.0014 |
| TC1400007478.hg.1       | <i>GPHN</i>            | -1.07 | 2.24E-05 | 0.0025 |
| TC0200009470.hg.1       | <i>HNMT</i>            | -1.07 | 0.0004   | 0.0117 |
| TC1900009808.hg.1       | <i>ADGRL1</i>          | -1.07 | 6.40E-05 | 0.0042 |
| TC1600011354.hg.1       | <i>NPIPA2</i>          | -1.07 | 2.76E-05 | 0.0027 |
| TC1100009994.hg.1       | <i>OR2D2</i>           | -1.08 | 8.45E-05 | 0.0049 |

|                         |                             |       |          |        |
|-------------------------|-----------------------------|-------|----------|--------|
| TC2200009161.hg.1       | <i>LMF2</i>                 | -1.08 | 0.0007   | 0.0174 |
| TC1100012722.hg.1       | <i>CDON</i>                 | -1.08 | 0.0143   | 0.1134 |
| TC1100007430.hg.1       | <i>GYLTL1B</i>              | -1.08 | 2.56E-06 | 0.0007 |
| TC1600011353.hg.1       | <i>NPIPA3</i>               | -1.08 | 3.31E-05 | 0.0030 |
| TC1300008668.hg.1       | <i>LHFP</i>                 | -1.08 | 3.64E-05 | 0.0030 |
| TC0300012048.hg.1       | <i>ZBTB20; MIR568</i>       | -1.08 | 4.42E-05 | 0.0035 |
| TC0400012933.hg.1       | <i>NAAA</i>                 | -1.09 | 1.16E-06 | 0.0004 |
| TC0100012695.hg.1       | <i>DNAJC11</i>              | -1.09 | 0.0266   | 0.1628 |
| TC1600011487.hg.1       | <i>NPIPA8</i>               | -1.09 | 9.67E-06 | 0.0014 |
| TC1900010037.hg.1       | <i>SUGP2</i>                | -1.09 | 2.45E-05 | 0.0026 |
| TC0700010989.hg.1       | <i>TNS3</i>                 | -1.09 | 3.46E-05 | 0.0030 |
| TC0200007421.hg.1       | <i>CAMKMT</i>               | -1.09 | 9.65E-05 | 0.0052 |
| TC0700011571.hg.1       | <i>YWHAG</i>                | -1.09 | 0.0006   | 0.0168 |
| TC0300013601.hg.1       | <i>ATP13A3</i>              | -1.09 | 0.0009   | 0.0218 |
| TC0300007474.hg.1       | <i>DNAH1</i>                | -1.09 | 0.0010   | 0.0225 |
| TC0100014459.hg.1       | <i>LINC01359</i>            | -1.09 | 0.0006   | 0.0170 |
| TC0300007051.hg.1       | <i>ITGA9</i>                | -1.1  | 2.31E-06 | 0.0006 |
| TSUnmapped00000267.hg.1 | <i>LRP6</i>                 | -1.1  | 5.68E-06 | 0.0011 |
| TC1700008095.hg.1       | <i>LRRC37A</i>              | -1.1  | 1.98E-05 | 0.0022 |
| TC0300007647.hg.1       | <i>PTPRG</i>                | -1.1  | 0.0005   | 0.0152 |
| TC0100011091.hg.1       | <i>C1orf53</i>              | -1.1  | 0.0009   | 0.0208 |
| TC0200016648.hg.1       | <i>CDC42EP3</i>             | -1.1  | 2.68E-05 | 0.0027 |
| TC1300007197.hg.1       | <i>DLEU1</i>                | -1.1  | 0.0002   | 0.0072 |
| TC0200010511.hg.1       | <i>NBEAL1</i>               | -1.1  | 0.0010   | 0.0223 |
| TC0200008627.hg.1       | <i>NPAS2</i>                | -1.11 | 4.77E-06 | 0.0010 |
| TC0700012755.hg.1       | <i>KIAA1549</i>             | -1.11 | 6.62E-06 | 0.0011 |
| TC1200006786.hg.1       | <i>TMEM52B</i>              | -1.11 | 0.0001   | 0.0063 |
| TC1900011190.hg.1       | <i>IZUMO2</i>               | -1.11 | 0.0032   | 0.0458 |
| TC0500013231.hg.1       | <i>CATSPER3</i>             | -1.11 | 0.0078   | 0.0772 |
| TC0100016135.hg.1       | <i>SLAMF6</i>               | -1.12 | 0.0002   | 0.0090 |
| TC0600009697.hg.1       | <i>PHACTR2</i>              | -1.12 | 0.0022   | 0.0368 |
| TC0100013630.hg.1       | <i>YARS</i>                 | -1.12 | 0.0029   | 0.0429 |
| TC1600009524.hg.1       | <i>NPIPA5</i>               | -1.12 | 5.98E-06 | 0.0011 |
| TC0200011195.hg.1       | <i>3AP1; noygly; torkey</i> | -1.12 | 0.0002   | 0.0078 |
| TC1900011796.hg.1       | <i>NDUFA3</i>               | -1.12 | 0.0002   | 0.0081 |
| TC0700013401.hg.1       | <i>IC007566.10; GATAD</i>   | -1.12 | 0.0004   | 0.0123 |
| TC1000007954.hg.1       | <i>SLC29A3</i>              | -1.12 | 0.0006   | 0.0157 |
| TC1200007804.hg.1       | <i>METTL7B</i>              | -1.12 | 0.0012   | 0.0253 |
| TC0800010945.hg.1       | <i>SLC10A5</i>              | -1.12 | 0.0021   | 0.0357 |
| TC2200009267.hg.1       | <i>GTPBP1</i>               | -1.12 | 0.0176   | 0.1291 |
| TC0500012210.hg.1       | <i>TMEM173</i>              | -1.13 | 1.75E-06 | 0.0005 |
| TC1100013057.hg.1       | <i>TCIRG1</i>               | -1.13 | 4.15E-05 | 0.0033 |
| TC0300013913.hg.1       | <i>TPRG1</i>                | -1.13 | 0.0124   | 0.1040 |
| TC0200010729.hg.1       | <i>XRCC5</i>                | -1.13 | 3.79E-05 | 0.0031 |
| TC0700007034.hg.1       | <i>CREB5</i>                | -1.13 | 0.0087   | 0.0829 |
| TC1500006925.hg.1       | <i>THBS1</i>                | -1.14 | 0.0003   | 0.0099 |

|                            |                       |       |          |        |
|----------------------------|-----------------------|-------|----------|--------|
| TC1900008188.hg.1          | <i>MEGF8</i>          | -1.14 | 0.0009   | 0.0213 |
| TC1100010643.hg.1          | <i>TP53I11</i>        | -1.14 | 0.0074   | 0.0754 |
| TC1900011919.hg.1          | <i>ZNF708</i>         | -1.14 | 5.83E-05 | 0.0041 |
| TC0900008250.hg.1          | <i>ZNF189</i>         | -1.14 | 0.0001   | 0.0068 |
| TC1000012130.hg.1          | <i>FAM53B</i>         | -1.14 | 0.0146   | 0.1144 |
| TC0200007194.hg.1          | <i>BIRC6</i>          | -1.15 | 0.0001   | 0.0066 |
| TC1600007037.hg.1          | <i>NPIPA7</i>         | -1.15 | 8.83E-07 | 0.0004 |
| TC2000009317.hg.1          | <i>SULF2</i>          | -1.15 | 3.54E-05 | 0.0030 |
| TC0900012173.hg.1          | <i>GARNL3</i>         | -1.15 | 5.23E-06 | 0.0010 |
| TC0100014660.hg.1          | <i>FUBP1</i>          | -1.15 | 0.0001   | 0.0066 |
| TC0700013578.hg.1          | <i>SEMA3A</i>         | -1.16 | 9.69E-05 | 0.0052 |
| TSUnmapped00000073.hg.1    | <i>NDUFA10</i>        | -1.16 | 0.0292   | 0.1715 |
| TC1300008705.hg.1          | <i>ELF1</i>           | -1.17 | 2.46E-05 | 0.0026 |
| TC0100008100.hg.1          | <i>C1orf228</i>       | -1.18 | 0.0006   | 0.0169 |
| TC0300008316.hg.1          | <i>PVRL3</i>          | -1.18 | 7.32E-06 | 0.0012 |
| TC1600011365.hg.1          | <i>NPIPB9</i>         | -1.19 | 4.81E-06 | 0.0010 |
| TC1300009522.hg.1          | <i>UGGT2</i>          | -1.19 | 8.36E-05 | 0.0049 |
| TC1300008927.hg.1          | <i>KPNA3</i>          | -1.19 | 0.0006   | 0.0156 |
| TC0100013897.hg.1          | <i>P3H1</i>           | -1.19 | 5.64E-07 | 0.0003 |
| TC1600008646.hg.1          | <i>ATP2C2</i>         | -1.19 | 8.85E-05 | 0.0050 |
| TC1600006826.hg.1          | <i>ABAT</i>           | -1.19 | 0.0061   | 0.0677 |
| TC1100009233.hg.1          | <i>CCDC84</i>         | -1.19 | 5.76E-06 | 0.0011 |
| TC0200007999.hg.1          | <i>ZNF638</i>         | -1.19 | 2.94E-05 | 0.0028 |
| TC1600007368.hg.1          | <i>ATP2A1</i>         | -1.2  | 0.0002   | 0.0078 |
| TC1100010207.hg.1          | <i>SOX6; MIR6073</i>  | -1.2  | 0.0004   | 0.0131 |
| TC0600014074.hg.1          | <i>HIVEP1</i>         | -1.2  | 8.02E-07 | 0.0004 |
| TC1800008235.hg.1          | <i>ABHD3</i>          | -1.2  | 0.0010   | 0.0233 |
| TC0X00008514.hg.1          | <i>DDX26B</i>         | -1.2  | 0.0011   | 0.0236 |
| TC0600014268.hg.1          | <i>PRRT1</i>          | -1.2  | 8.86E-06 | 0.0013 |
| TC0X00011338.hg.1          | <i>ARSD</i>           | -1.21 | 5.00E-06 | 0.0010 |
| TC1600010740.hg.1          | <i>PDXDC2P</i>        | -1.21 | 6.73E-06 | 0.0012 |
| TC1500007238.hg.1          | <i>TMOD2</i>          | -1.21 | 0.0004   | 0.0135 |
| TSUnmapped00000154.hg.1    | <i>LRP6</i>           | -1.21 | 1.82E-06 | 0.0005 |
| TC1100006485.hg.1          | <i>TMEM80</i>         | -1.21 | 2.79E-06 | 0.0007 |
| TC2000008381.hg.1          | <i>JAG1</i>           | -1.21 | 7.30E-06 | 0.0012 |
| TC0100013205.hg.1          | <i>ECE1</i>           | -1.21 | 9.92E-06 | 0.0014 |
| TC0500013282.hg.1          | <i>ZDHHC11</i>        | -1.21 | 1.14E-05 | 0.0015 |
| TC0200009955.hg.1          | <i>CYBRD1</i>         | -1.21 | 4.51E-05 | 0.0035 |
| TC1500008616.hg.1          | <i>HERC2P3</i>        | -1.21 | 0.0001   | 0.0057 |
| TC0900011501.hg.1          | <i>NR6A1</i>          | -1.21 | 0.0008   | 0.0206 |
| TC0700009696.hg.1          | <i>CHPF2; MIR671</i>  | -1.22 | 0.0014   | 0.0281 |
| _GL000194v1_random0000643: | <i>MAFIP; TEKT4P2</i> | -1.22 | 0.0063   | 0.0691 |
| TC0100010121.hg.1          | <i>HCN3</i>           | -1.22 | 7.38E-06 | 0.0012 |
| TC1400010390.hg.1          | <i>AHNAK2</i>         | -1.22 | 3.10E-05 | 0.0029 |
| TC0800007460.hg.1          | <i>HGSNAT</i>         | -1.23 | 5.13E-06 | 0.0010 |
| TC0600010936.hg.1          | <i>ATXN1</i>          | -1.23 | 4.64E-05 | 0.0036 |

|                         |                            |       |          |        |
|-------------------------|----------------------------|-------|----------|--------|
| TC1600008977.hg.1       | <i>CCDC78</i>              | -1.23 | 0.0002   | 0.0070 |
| TC0700009472.hg.1       | <i>EPHB6</i>               | -1.23 | 5.89E-05 | 0.0041 |
| TC2100007274.hg.1       | <i>NDUFV3</i>              | -1.23 | 0.0018   | 0.0325 |
| TC1700012423.hg.1       | <i>LRRC37A4P</i>           | -1.23 | 4.73E-05 | 0.0036 |
| TC0100018280.hg.1       | <i>FAM231D; LINC00869</i>  | -1.24 | 3.60E-06 | 0.0008 |
| TC1100006495.hg.1       | <i>TSPAN4</i>              | -1.24 | 3.65E-05 | 0.0030 |
| TC1200007594.hg.1       | <i>ASIC1</i>               | -1.24 | 0.0008   | 0.0194 |
| TC2000009360.hg.1       | <i>PREX1</i>               | -1.24 | 0.0481   | 0.2289 |
| TC0400008093.hg.1       | <i>PKD2</i>                | -1.25 | 1.58E-06 | 0.0005 |
| TC0200012980.hg.1       | <i>ASPRV1; PCBP1-AS1</i>   | -1.25 | 1.46E-05 | 0.0018 |
| TC1100006444.hg.1       | <i>ATHL1</i>               | -1.25 | 8.54E-05 | 0.0049 |
| TC0700009215.hg.1       | <i>EXOC4</i>               | -1.25 | 0.0018   | 0.0327 |
| TC0100016322.hg.1       | <i>GPR161</i>              | -1.26 | 4.53E-06 | 0.0009 |
| TC1200009734.hg.1       | <i>VAMP1</i>               | -1.26 | 2.02E-06 | 0.0006 |
| TC1700012296.hg.1       | <i>PRKAR1A; ARSG</i>       | -1.27 | 7.41E-06 | 0.0012 |
| TC0100007789.hg.1       | <i>ago-03</i>              | -1.27 | 3.33E-05 | 0.0030 |
| TC1400010756.hg.1       | <i>GPR135</i>              | -1.27 | 0.0004   | 0.0118 |
| TC1600011368.hg.1       | <i>LAT</i>                 | -1.27 | 4.26E-06 | 0.0009 |
| TC1400010774.hg.1       | <i>FOXN3</i>               | -1.27 | 6.46E-05 | 0.0043 |
| TC1900010531.hg.1       | <i>ZNF461</i>              | -1.27 | 6.77E-05 | 0.0044 |
| TSUnmapped00000313.hg.1 | <i>CCDC84</i>              | -1.27 | 9.84E-05 | 0.0053 |
| TC0100010674.hg.1       | <i>GPR52</i>               | -1.27 | 0.0360   | 0.1933 |
| TC0800010285.hg.1       | <i>SLC20A2</i>             | -1.28 | 8.22E-06 | 0.0013 |
| TC1600009855.hg.1       | <i>NPIP6</i>               | -1.28 | 1.21E-05 | 0.0016 |
| TC1100009200.hg.1       | <i>CD3E</i>                | -1.28 | 3.75E-05 | 0.0031 |
| TC1200009997.hg.1       | <i>GRIN2B</i>              | -1.28 | 2.19E-05 | 0.0024 |
| TC0200016544.hg.1       | <i>RIF1</i>                | -1.29 | 7.28E-05 | 0.0046 |
| TC0800008146.hg.1       | <i>WWP1</i>                | -1.29 | 0.0007   | 0.0183 |
| TC0M00006434.hg.1       | <i>ND2</i>                 | -1.3  | 3.02E-07 | 0.0003 |
| TC2200007505.hg.1       | <i>sep-03</i>              | -1.3  | 4.84E-07 | 0.0003 |
| TC0400008483.hg.1       | <i>UGT8</i>                | -1.3  | 2.66E-07 | 0.0003 |
| TC0400012947.hg.1       | <i>GPRIN3</i>              | -1.3  | 0.0001   | 0.0057 |
| TC0200012031.hg.1       | <i>HADHA</i>               | -1.31 | 0.0051   | 0.0609 |
| TC1000012586.hg.1       | <i>SEC31B</i>              | -1.31 | 1.62E-06 | 0.0005 |
| TC0800006873.hg.1       | <i>PDGFRL</i>              | -1.31 | 0.0004   | 0.0128 |
| TC0400007542.hg.1       | <i>KIT</i>                 | -1.31 | 0.0025   | 0.0398 |
| TC0300006465.hg.1       | <i>LRRN1</i>               | -1.31 | 7.35E-06 | 0.0012 |
| TC0600014192.hg.1       | <i>RP11-307P5.1; SAMD1</i> | -1.31 | 1.75E-05 | 0.0020 |
| TC0900010886.hg.1       | <i>PTCH1</i>               | -1.33 | 9.68E-07 | 0.0004 |
| TC0900009679.hg.1       | <i>MLLT3</i>               | -1.33 | 0.0360   | 0.1935 |
| TC1100008985.hg.1       | <i>ATM</i>                 | -1.35 | 5.22E-06 | 0.0010 |
| TC0200007261.hg.1       | <i>QPCT</i>                | -1.35 | 0.0005   | 0.0154 |
| TC0100011382.hg.1       | <i>DYRK3</i>               | -1.35 | 0.0254   | 0.1586 |
| TC0800008943.hg.1       | <i>PHF20L1</i>             | -1.35 | 6.57E-05 | 0.0043 |
| TC1700008261.hg.1       | <i>EPN3</i>                | -1.35 | 0.0117   | 0.1005 |
| TC1600011465.hg.1       | <i>ERVK13-1</i>            | -1.36 | 2.99E-06 | 0.0007 |

|                         |                            |       |          |        |
|-------------------------|----------------------------|-------|----------|--------|
| TC0400012903.hg.1       | <i>PROM1</i>               | -1.36 | 1.49E-05 | 0.0018 |
| TC1100010688.hg.1       | <i>PHF21A</i>              | -1.36 | 4.94E-06 | 0.0010 |
| TC1600011235.hg.1       | <i>GALNS</i>               | -1.36 | 4.74E-05 | 0.0036 |
| TC1900011328.hg.1       | <i>ZNF160</i>              | -1.37 | 0.0005   | 0.0150 |
| TC0200015894.hg.1       | <i>DOCK10</i>              | -1.37 | 0.0061   | 0.0677 |
| TC1200010601.hg.1       | <i>FKBP11; ARF3</i>        | -1.37 | 1.74E-06 | 0.0005 |
| TC1900011869.hg.1       | <i>RGL3</i>                | -1.38 | 2.55E-07 | 0.0003 |
| TC0200008534.hg.1       | <i>ANKRD36</i>             | -1.38 | 9.00E-07 | 0.0004 |
| TC0100015990.hg.1       | <i>PAQR6</i>               | -1.38 | 1.16E-06 | 0.0004 |
| TC1900011194.hg.1       | <i>KCNC3</i>               | -1.38 | 1.24E-06 | 0.0004 |
| TC0100006486.hg.1       | <i>AGRN</i>                | -1.38 | 1.11E-05 | 0.0015 |
| TC0500013322.hg.1       | <i>NAIP</i>                | -1.38 | 2.68E-05 | 0.0027 |
| TC1800008287.hg.1       | <i>ANKRD29</i>             | -1.39 | 0.0006   | 0.0169 |
| TC1300008114.hg.1       | <i>CUL4A</i>               | -1.4  | 0.0002   | 0.0081 |
| TC1700008085.hg.1       | <i>STH</i>                 | -1.4  | 0.0009   | 0.0213 |
| TC0200013567.hg.1       | <i>ANKRD36B</i>            | -1.41 | 1.58E-07 | 0.0002 |
| TSUnmapped00000246.hg.1 | <i>CCDC84</i>              | -1.41 | 9.57E-07 | 0.0004 |
| TC0100017713.hg.1       | <i>TTC13</i>               | -1.41 | 4.79E-08 | 0.0001 |
| TC0300013513.hg.1       | <i>P3H2</i>                | -1.42 | 9.24E-05 | 0.0051 |
| TC1600009916.hg.1       | <i>NPIPB11</i>             | -1.42 | 7.77E-07 | 0.0004 |
| TC1600011364.hg.1       | <i>NPIPB5</i>              | -1.42 | 6.33E-06 | 0.0011 |
| TC1100009859.hg.1       | <i>NUP98</i>               | -1.42 | 2.00E-05 | 0.0023 |
| TC1600007353.hg.1       | <i>NPIPB8</i>              | -1.43 | 1.03E-05 | 0.0014 |
| TC2200009170.hg.1       | <i>ARSA</i>                | -1.43 | 0.0006   | 0.0158 |
| TC1900007888.hg.1       | <i>APLP1</i>               | -1.43 | 0.0013   | 0.0267 |
| TC1900011868.hg.1       | <i>EPOR</i>                | -1.44 | 1.30E-06 | 0.0005 |
| TC0100014769.hg.1       | <i>MCOLN3</i>              | -1.44 | 7.23E-06 | 0.0012 |
| TC1600007030.hg.1       | <i>NIPA7; NPIPA8; PKD1</i> | -1.45 | 1.20E-06 | 0.0004 |
| TC1600008407.hg.1       | <i>NPIPB15</i>             | -1.45 | 3.79E-06 | 0.0009 |
| TC0100015797.hg.1       | <i>POGZ</i>                | -1.45 | 0.0052   | 0.0612 |
| TC1000012144.hg.1       | <i>CTBP2</i>               | -1.46 | 2.96E-06 | 0.0007 |
| TC1900011398.hg.1       | <i>TMC4</i>                | -1.46 | 1.42E-05 | 0.0018 |
| TC1200006670.hg.1       | <i>CLSTN3</i>              | -1.46 | 5.17E-06 | 0.0010 |
| TC0100009149.hg.1       | <i>PTBP2</i>               | -1.46 | 7.50E-05 | 0.0047 |
| TC1400007774.hg.1       | <i>NRXN3</i>               | -1.47 | 6.83E-07 | 0.0004 |
| TC0200016354.hg.1       | <i>HDLBP</i>               | -1.47 | 0.0024   | 0.0381 |
| TC0600010066.hg.1       | <i>IGF2R</i>               | -1.49 | 9.71E-08 | 0.0002 |
| TC1200010185.hg.1       | <i>ITPR2</i>               | -1.49 | 5.46E-06 | 0.0010 |
| TC0200010448.hg.1       | <i>STRADB</i>              | -1.49 | 0.0004   | 0.0128 |
| TSUnmapped00000178.hg.1 | <i>SLC16A1</i>             | -1.5  | 2.67E-05 | 0.0027 |
| TC0400008972.hg.1       | <i>DCLK2</i>               | -1.51 | 2.04E-06 | 0.0006 |
| TC0100010926.hg.1       | <i>OCLM</i>                | -1.51 | 0.0016   | 0.0301 |
| TC0300013520.hg.1       | <i>CLDN1</i>               | -1.52 | 5.18E-05 | 0.0038 |
| TC0300006696.hg.1       | <i>NR2C2</i>               | -1.52 | 0.0003   | 0.0103 |
| TC0600011943.hg.1       | <i>ENPP5</i>               | -1.53 | 8.02E-08 | 0.0001 |
| TC0900010056.hg.1       | <i>ANKRD18A; FAM95C</i>    | -1.54 | 8.04E-06 | 0.0013 |

|                   |                           |       |          |          |
|-------------------|---------------------------|-------|----------|----------|
| TC0100018526.hg.1 | <i>ILDR2</i>              | -1.55 | 1.31E-05 | 0.0017   |
| TC1900008286.hg.1 | <i>BCAM</i>               | -1.55 | 6.28E-07 | 0.0003   |
| TC1700008263.hg.1 | <i>ABCC3</i>              | -1.56 | 7.19E-07 | 0.0004   |
| TC0100012460.hg.1 | <i>UBE2J2</i>             | -1.56 | 9.25E-05 | 0.0051   |
| TC0400010529.hg.1 | <i>APBB2</i>              | -1.56 | 2.29E-05 | 0.0025   |
| TC1600009396.hg.1 | <i>TNP2</i>               | -1.56 | 0.0004   | 0.0127   |
| TC0200007188.hg.1 | <i>BIRC6</i>              | -1.58 | 0.0010   | 0.0223   |
| TC0600014111.hg.1 | <i>SYNGAP1; MIR5004</i>   | -1.59 | 5.46E-07 | 0.0003   |
| TC0600007387.hg.1 | <i>OR2B6</i>              | -1.59 | 8.78E-06 | 0.0013   |
| TC1600011505.hg.1 | <i>NPIP4</i>              | -1.6  | 4.39E-06 | 0.0009   |
| TC0600009240.hg.1 | <i>KPNA5</i>              | -1.61 | 0.0001   | 0.0060   |
| TC1900008012.hg.1 | <i>CATSPERG</i>           | -1.61 | 8.09E-05 | 0.0049   |
| TC1700010363.hg.1 | <i>P11-466A19.5; MYO1</i> | -1.63 | 3.20E-07 | 0.0003   |
| TC1100007366.hg.1 | <i>TTC17</i>              | -1.64 | 1.91E-06 | 0.0006   |
| TC1700008382.hg.1 | <i>MSI2</i>               | -1.68 | 0.0002   | 0.0070   |
| TC1600009958.hg.1 | <i>NPIP4</i>              | -1.68 | 1.70E-07 | 0.0002   |
| TC1200010006.hg.1 | <i>PLBD1</i>              | -1.68 | 2.14E-06 | 0.0006   |
| TC0100011621.hg.1 | <i>TGFB2; TGFB2-OT1</i>   | -1.69 | 4.58E-08 | 0.0001   |
| TC0100016983.hg.1 | <i>CHI3L1</i>             | -1.69 | 6.01E-05 | 0.0041   |
| TC0200008516.hg.1 | <i>CNNM3</i>              | -1.7  | 0.0002   | 0.0077   |
| TC0500011334.hg.1 | <i>TMEM167A</i>           | -1.72 | 0.0248   | 0.1566   |
| TC1900010782.hg.1 | <i>ATP1A3</i>             | -1.75 | 2.57E-08 | 9.19E-05 |
| TC0800007016.hg.1 | <i>CHMP7</i>              | -1.79 | 0.0001   | 0.0068   |
| TC1600011501.hg.1 | <i>NPIP3</i>              | -1.79 | 1.31E-06 | 0.0005   |
| TC0400006491.hg.1 | <i>IDUA</i>               | -1.8  | 3.67E-07 | 0.0003   |
| TC0600011615.hg.1 | <i>DEF6</i>               | -1.87 | 3.20E-05 | 0.0029   |
| TC1000010273.hg.1 | <i>NRP1</i>               | -1.89 | 9.24E-07 | 0.0004   |
| TC0200007273.hg.1 | <i>RMDN2</i>              | -1.92 | 2.36E-07 | 0.0003   |
| TC1100007453.hg.1 | <i>MDK</i>                | -1.92 | 5.70E-09 | 4.68E-05 |
| TC0800011595.hg.1 | <i>EXT1</i>               | -1.95 | 5.32E-07 | 0.0003   |
| TC0100009142.hg.1 | <i>PTBP2</i>              | -1.96 | 2.26E-08 | 9.19E-05 |
| TC0700011318.hg.1 | <i>ERV3-1; ZNF117</i>     | -1.96 | 6.92E-07 | 0.0004   |
| TC0700013443.hg.1 | <i>CFTR</i>               | -1.97 | 5.66E-08 | 0.0001   |
| TC0200009443.hg.1 | <i>R3HDM1</i>             | -2.07 | 1.89E-07 | 0.0002   |
| TC1500009709.hg.1 | <i>CA12</i>               | -2.43 | 3.70E-08 | 0.0001   |

The fold change was calculated as (expression in control cells)/(expression in cells silenced for *ZNF518B*) and expressed as logarithm in base 2

**Supplementary Table S3.** Genes affected in HCT116 cells by knocking-down the *ZNF518B* gene, as recovered from the Clariom-S assay

| ID                | Gene Symbol         | LogFC | P-value  | FDR      |
|-------------------|---------------------|-------|----------|----------|
| TC200009204.hg.1  | <i>TOMM34</i>       | 3.39  | 1.38E-12 | 1.48E-08 |
| TC0X00009386.hg.1 | <i>SRPX</i>         | 3.34  | 1.42E-10 | 5.02E-07 |
| TC1500010723.hg.1 | <i>CHAC1</i>        | 3.32  | 2.56E-07 | 5.71E-05 |
| TC0100009621.hg.1 | <i>PHGDH</i>        | 2.99  | 8.47E-09 | 6.73E-06 |
| TC0X00007744.hg.1 | <i>SH3BGRL</i>      | 2.54  | 1.02E-09 | 1.56E-06 |
| TC0500012486.hg.1 | <i>DCTN4</i>        | 2.45  | 1.48E-10 | 5.02E-07 |
| TC0400010048.hg.1 | <i>ZNF518B</i>      | 2.44  | 4.47E-09 | 4.57E-06 |
| TC0100014776.hg.1 | <i>DDAH1</i>        | 2.39  | 5.74E-08 | 2.16E-05 |
| TC1200007147.hg.1 | <i>ARNTL2</i>       | 2.27  | 3.36E-08 | 1.47E-05 |
| TC1100007785.hg.1 | <i>TMEM109</i>      | 2.22  | 6.14E-11 | 4.39E-07 |
| TC0800011150.hg.1 | <i>TP53INP1</i>     | 2.15  | 6.68E-08 | 2.39E-05 |
| TC2000007456.hg.1 | <i>TTPAL</i>        | 2.13  | 2.01E-07 | 4.84E-05 |
| TC0200008071.hg.1 | <i>MTHFD2</i>       | 2.09  | 6.22E-09 | 5.56E-06 |
| TC0900006708.hg.1 | <i>SNAPC3</i>       | 1.98  | 7.97E-09 | 6.58E-06 |
| TC1000011370.hg.1 | <i>ACTA2</i>        | 1.92  | 2.65E-09 | 3.32E-06 |
| TC0X00009650.hg.1 | <i>WDR45; PRAF2</i> | 1.9   | 9.63E-08 | 2.99E-05 |
| TC0200009687.hg.1 | <i>ARL6IP6</i>      | 1.87  | 5.39E-07 | 9.32E-05 |
| TC0900011655.hg.1 | <i>ZER1</i>         | 1.86  | 7.32E-08 | 2.45E-05 |
| TC0700012684.hg.1 | <i>AKR1B1</i>       | 1.85  | 6.22E-08 | 2.26E-05 |
| TC0900008028.hg.1 | <i>MFSD14B</i>      | 1.83  | 5.72E-09 | 5.45E-06 |
| TC1700008342.hg.1 | <i>PCTP</i>         | 1.81  | 1.66E-07 | 4.22E-05 |
| TC0800007351.hg.1 | <i>TACC1</i>        | 1.8   | 2.93E-08 | 1.42E-05 |
| TC1700008897.hg.1 | <i>MRPS7</i>        | 1.8   | 2.38E-06 | 0.0003   |
| TC1700012260.hg.1 | <i>COASY</i>        | 1.8   | 5.83E-10 | 1.14E-06 |
| TC2000009392.hg.1 | <i>B4GALT5</i>      | 1.8   | 6.56E-09 | 5.63E-06 |
| TC0100016162.hg.1 | <i>B4GALT3</i>      | 1.79  | 1.36E-07 | 3.74E-05 |
| TC1700008882.hg.1 | <i>KCTD2</i>        | 1.78  | 2.77E-09 | 3.32E-06 |
| TC0500012935.hg.1 | <i>KIAA1191</i>     | 1.78  | 1.38E-08 | 8.55E-06 |
| TC2000009218.hg.1 | <i>SDC4</i>         | 1.77  | 1.01E-09 | 1.56E-06 |
| TC1500007034.hg.1 | <i>SNAP23</i>       | 1.77  | 5.32E-08 | 2.07E-05 |
| TC0200007399.hg.1 | <i>PLEKHH2</i>      | 1.76  | 0.0006   | 0.0123   |
| TC1000008733.hg.1 | <i>MFSD13A</i>      | 1.74  | 2.99E-08 | 1.42E-05 |
| TC0800007459.hg.1 | <i>POMK</i>         | 1.74  | 5.85E-09 | 5.45E-06 |
| TC1500008341.hg.1 | <i>MAN2A2</i>       | 1.72  | 4.52E-07 | 8.22E-05 |
| TC2000010026.hg.1 | <i>TMEM189</i>      | 1.71  | 3.97E-09 | 4.28E-06 |
| TC0800006980.hg.1 | <i>SLC39A14</i>     | 1.71  | 2.67E-08 | 1.33E-05 |
| TC0200009065.hg.1 | <i>DBI</i>          | 1.7   | 1.03E-08 | 7.86E-06 |
| TC0800008416.hg.1 | <i>GRHL2</i>        | 1.69  | 1.17E-06 | 0.0002   |
| TC0X00010966.hg.1 | <i>ATP11C</i>       | 1.69  | 2.47E-07 | 5.58E-05 |
| TC0100015866.hg.1 | <i>S100A4</i>       | 1.68  | 3.23E-05 | 0.0017   |
| TC1200009252.hg.1 | <i>TCTN2</i>        | 1.68  | 5.36E-07 | 9.32E-05 |

|                   |                       |      |          |          |
|-------------------|-----------------------|------|----------|----------|
| TC1900006622.hg.1 | <i>NCLN</i>           | 1.67 | 9.91E-07 | 0.0001   |
| TC0700011876.hg.1 | <i>ASNS</i>           | 1.67 | 0.0003   | 0.0085   |
| TC0700007993.hg.1 | <i>CLDN4</i>          | 1.66 | 3.99E-09 | 4.28E-06 |
| TC1100007819.hg.1 | <i>MYRF</i>           | 1.64 | 1.03E-05 | 0.0007   |
| TC1600010711.hg.1 | <i>CHTF8</i>          | 1.63 | 1.70E-08 | 9.59E-06 |
| TC0600011697.hg.1 | <i>CCDC167</i>        | 1.58 | 6.17E-07 | 0.0001   |
| TC0200016419.hg.1 | <i>GPN1</i>           | 1.57 | 4.48E-08 | 1.89E-05 |
| TC0100013818.hg.1 | <i>PPT1</i>           | 1.56 | 5.41E-08 | 2.07E-05 |
| TC0900010968.hg.1 | <i>TRIM14</i>         | 1.56 | 1.16E-06 | 0.0002   |
| TC2200008832.hg.1 | <i>DESI1</i>          | 1.55 | 5.97E-07 | 9.93E-05 |
| TC1200010902.hg.1 | <i>ANKRD52</i>        | 1.55 | 7.80E-07 | 0.0001   |
| TC0300010209.hg.1 | <i>TADA3</i>          | 1.54 | 8.01E-07 | 0.0001   |
| TC1200008792.hg.1 | <i>UNG</i>            | 1.54 | 1.27E-06 | 0.0002   |
| TC1400010169.hg.1 | <i>SETD3</i>          | 1.52 | 8.42E-08 | 2.78E-05 |
| TC1500010080.hg.1 | <i>IMP3</i>           | 1.52 | 8.88E-05 | 0.0034   |
| TC1100011032.hg.1 | <i>CYB561A3</i>       | 1.52 | 3.38E-07 | 6.77E-05 |
| TC0200016686.hg.1 | <i>TEX261</i>         | 1.51 | 2.33E-06 | 0.0003   |
| TC0800007738.hg.1 | <i>SDCBP</i>          | 1.51 | 1.18E-08 | 8.16E-06 |
| TC1500008245.hg.1 | <i>ABHD2</i>          | 1.51 | 1.35E-06 | 0.0002   |
| TC0900008887.hg.1 | <i>TBC1D13</i>        | 1.51 | 5.88E-07 | 9.86E-05 |
| TC0100015872.hg.1 | <i>S100A14</i>        | 1.5  | 4.06E-06 | 0.0004   |
| TC0200008351.hg.1 | <i>RPIA</i>           | 1.5  | 1.48E-07 | 3.95E-05 |
| TC0100015182.hg.1 | <i>TAF13</i>          | 1.5  | 1.10E-07 | 3.32E-05 |
| TC0800011211.hg.1 | <i>NIPAL2</i>         | 1.48 | 0.0009   | 0.0173   |
| TC1200012723.hg.1 | <i>ZNF664</i>         | 1.47 | 3.54E-07 | 6.84E-05 |
| TC0900009930.hg.1 | <i>FANCG</i>          | 1.47 | 1.59E-05 | 0.0010   |
| TC2000010027.hg.1 | <i>TMEM189-UBE2V1</i> | 1.47 | 1.40E-08 | 8.55E-06 |
| TC0100010525.hg.1 | <i>SFT2D2</i>         | 1.47 | 4.90E-07 | 8.68E-05 |
| TC0700009488.hg.1 | <i>CASP2</i>          | 1.47 | 1.53E-08 | 9.09E-06 |
| TC0200010801.hg.1 | <i>RQCD1</i>          | 1.46 | 8.66E-08 | 2.82E-05 |
| TC0600011808.hg.1 | <i>MED20</i>          | 1.46 | 9.38E-05 | 0.0035   |
| TC0200011690.hg.1 | <i>YWHAQ</i>          | 1.45 | 3.49E-07 | 6.84E-05 |
| TC2200009028.hg.1 | <i>CERK</i>           | 1.45 | 3.70E-07 | 7.02E-05 |
| TC0600011996.hg.1 | <i>MUT</i>            | 1.45 | 0.0007   | 0.0147   |
| TC0100008620.hg.1 | <i>DNAJC6</i>         | 1.45 | 0.0032   | 0.0406   |
| TC0200008501.hg.1 | <i>ITPRIPL1</i>       | 1.44 | 2.00E-05 | 0.0012   |
| TC1100007801.hg.1 | <i>TMEM138</i>        | 1.43 | 5.85E-07 | 9.86E-05 |
| TC0900011432.hg.1 | <i>RBM18</i>          | 1.43 | 4.63E-06 | 0.0004   |
| TC0500009481.hg.1 | <i>ATP6V0E1</i>       | 1.41 | 6.31E-05 | 0.0027   |
| TC1000012491.hg.1 | <i>ENTPD7</i>         | 1.41 | 2.97E-07 | 6.36E-05 |
| TC0100006619.hg.1 | <i>TPRG1L</i>         | 1.41 | 1.69E-05 | 0.0010   |
| TC0700011054.hg.1 | <i>GRB10</i>          | 1.4  | 8.52E-07 | 0.0001   |
| TC0100015079.hg.1 | <i>EXTL2</i>          | 1.4  | 7.24E-05 | 0.0030   |
| TC0600009534.hg.1 | <i>MYB</i>            | 1.4  | 3.79E-05 | 0.0019   |
| TC1400007695.hg.1 | <i>EIF2B2</i>         | 1.4  | 1.58E-06 | 0.0002   |
| TC0600008066.hg.1 | <i>KLHDC3</i>         | 1.39 | 7.29E-07 | 0.0001   |



|                   |                        |      |          |          |
|-------------------|------------------------|------|----------|----------|
| TC2200006540.hg.1 | <i>USP18</i>           | 1.39 | 1.66E-07 | 4.22E-05 |
| TC0100013483.hg.1 | <i>TAF12</i>           | 1.39 | 1.67E-07 | 4.22E-05 |
| TC0800012284.hg.1 | <i>EXTL3</i>           | 1.38 | 2.00E-06 | 0.0002   |
| TC1100009248.hg.1 | <i>RNF26</i>           | 1.38 | 1.49E-07 | 3.95E-05 |
| TC0100012089.hg.1 | <i>GPR137B</i>         | 1.38 | 5.18E-07 | 9.10E-05 |
| TC1400006715.hg.1 | <i>PCK2</i>            | 1.38 | 0.0033   | 0.0413   |
| TC1800009284.hg.1 | <i>C18orf32</i>        | 1.37 | 2.07E-07 | 4.93E-05 |
| TC1800006635.hg.1 | <i>TWSG1</i>           | 1.36 | 2.54E-08 | 1.29E-05 |
| TC1000012577.hg.1 | <i>LIPA</i>            | 1.36 | 1.43E-07 | 3.88E-05 |
| TC1000008400.hg.1 | <i>IFIT1</i>           | 1.36 | 1.26E-06 | 0.0002   |
| TC2000007457.hg.1 | <i>PKIG</i>            | 1.36 | 0.0002   | 0.0066   |
| TC1100010051.hg.1 | <i>TMEM9B</i>          | 1.36 | 3.58E-07 | 6.86E-05 |
| TC1400007691.hg.1 | <i>DLST</i>            | 1.35 | 2.96E-06 | 0.0003   |
| TC1200006905.hg.1 | <i>FAM234B</i>         | 1.35 | 1.01E-05 | 0.0007   |
| TC1700008328.hg.1 | <i>STXBP4</i>          | 1.35 | 6.09E-05 | 0.0027   |
| TC1800007543.hg.1 | <i>SERPIN5</i>         | 1.35 | 0.0001   | 0.0037   |
| TC0400012251.hg.1 | <i>C4orf46</i>         | 1.34 | 2.77E-07 | 6.05E-05 |
| TC0100018472.hg.1 | <i>SEC22B</i>          | 1.34 | 7.15E-06 | 0.0006   |
| TC1700011208.hg.1 | <i>TRIM25; MIR3614</i> | 1.33 | 8.98E-08 | 2.87E-05 |
| TC1700007102.hg.1 | <i>ALKBH5</i>          | 1.33 | 7.37E-07 | 0.0001   |
| TC1200012083.hg.1 | <i>FBXO21</i>          | 1.33 | 1.97E-06 | 0.0002   |
| TC0700007811.hg.1 | <i>INTS4P2</i>         | 1.33 | 0.0002   | 0.0065   |
| TC0700013534.hg.1 | <i>GGCT</i>            | 1.32 | 8.85E-07 | 0.0001   |
| TC0300013838.hg.1 | <i>ABHD14A</i>         | 1.31 | 8.30E-06 | 0.0006   |
| TC0500009131.hg.1 | <i>G3BP1</i>           | 1.31 | 3.20E-07 | 6.63E-05 |
| TC0900009957.hg.1 | <i>HINT2</i>           | 1.3  | 1.33E-05 | 0.0009   |
| TC1500008231.hg.1 | <i>AEN</i>             | 1.3  | 1.88E-05 | 0.0011   |
| TC1600008259.hg.1 | <i>PDPR</i>            | 1.3  | 7.96E-05 | 0.0032   |
| TC1200007161.hg.1 | <i>MRPS35</i>          | 1.3  | 2.00E-06 | 0.0002   |
| TC1600011347.hg.1 | <i>ALG1; NAGPA-AS1</i> | 1.3  | 9.02E-06 | 0.0007   |
| TC1900007688.hg.1 | <i>CCNE1</i>           | 1.29 | 1.00E-06 | 0.0001   |
| TC0400006579.hg.1 | <i>ADD1</i>            | 1.29 | 1.13E-06 | 0.0002   |
| TC1000007272.hg.1 | <i>CREM</i>            | 1.29 | 0.0013   | 0.0219   |
| TC1900009639.hg.1 | <i>AP1M2</i>           | 1.29 | 3.01E-05 | 0.0016   |
| TC0700011785.hg.1 | <i>CDK6</i>            | 1.28 | 1.89E-07 | 4.66E-05 |
| TC0700012780.hg.1 | <i>HIPK2</i>           | 1.28 | 3.29E-07 | 6.66E-05 |
| TC2200008036.hg.1 | <i>USP41</i>           | 1.28 | 8.13E-05 | 0.0032   |
| TC0300007410.hg.1 | <i>GNAI2</i>           | 1.28 | 1.93E-07 | 4.70E-05 |
| TC0200013096.hg.1 | <i>MOB1A</i>           | 1.27 | 4.20E-07 | 7.77E-05 |
| TC0800006566.hg.1 | <i>AGPAT5</i>          | 1.27 | 3.60E-06 | 0.0004   |
| TC1700006464.hg.1 | <i>FAM57A</i>          | 1.27 | 4.75E-05 | 0.0022   |
| TC1600009200.hg.1 | <i>TRAP1</i>           | 1.27 | 2.99E-06 | 0.0003   |
| TC0500013224.hg.1 | <i>SLC27A6</i>         | 1.27 | 0.0014   | 0.0226   |
| TC0900008927.hg.1 | <i>NTMT1</i>           | 1.27 | 0.0029   | 0.0382   |
| TC2000007942.hg.1 | <i>FAM217B</i>         | 1.26 | 0.0018   | 0.0269   |
| TC0900008219.hg.1 | <i>NR4A3</i>           | 1.26 | 0.0145   | 0.1166   |

|                   |                           |      |          |          |
|-------------------|---------------------------|------|----------|----------|
| TC2000006504.hg.1 | <i>STK35</i>              | 1.25 | 4.27E-06 | 0.0004   |
| TC0800011137.hg.1 | <i>RAD54B; FSBP</i>       | 1.25 | 2.51E-06 | 0.0003   |
| TC0600006864.hg.1 | <i>RIOK1</i>              | 1.25 | 0.0002   | 0.0066   |
| TC1700007262.hg.1 | <i>MAP2K3</i>             | 1.24 | 3.22E-06 | 0.0003   |
| TC0600008073.hg.1 | <i>SRF</i>                | 1.24 | 7.60E-06 | 0.0006   |
| TC0100012593.hg.1 | <i>WRAP73</i>             | 1.24 | 0.0026   | 0.0354   |
| TC1200008942.hg.1 | <i>PLBD2</i>              | 1.23 | 8.57E-07 | 0.0001   |
| TC1100008447.hg.1 | <i>SPCS2</i>              | 1.23 | 2.12E-05 | 0.0012   |
| TC1600007235.hg.1 | <i>PLK1</i>               | 1.23 | 3.11E-07 | 6.61E-05 |
| TC1000008193.hg.1 | <i>PPIF</i>               | 1.23 | 5.48E-07 | 9.33E-05 |
| TC0400006706.hg.1 | <i>TBC1D14</i>            | 1.23 | 1.39E-06 | 0.0002   |
| TC1900006924.hg.1 | <i>ZNF317</i>             | 1.23 | 1.45E-05 | 0.0010   |
| TC0700011710.hg.1 | <i>SLC25A40</i>           | 1.23 | 7.85E-07 | 0.0001   |
| TC1500009109.hg.1 | <i>C15orf57; MRPL42P5</i> | 1.22 | 2.27E-06 | 0.0003   |
| TC0100018473.hg.1 | <i>SEC22B</i>             | 1.22 | 2.82E-06 | 0.0003   |
| TC1600009942.hg.1 | <i>CDIPT</i>              | 1.22 | 6.44E-06 | 0.0005   |
| TC1000007876.hg.1 | <i>DDX21</i>              | 1.22 | 2.13E-05 | 0.0012   |
| TC2200008828.hg.1 | <i>PHF5A</i>              | 1.21 | 3.59E-06 | 0.0004   |
| TC0100006865.hg.1 | <i>AGTRAP</i>             | 1.21 | 1.35E-05 | 0.0009   |
| TC0900011778.hg.1 | <i>RAPGEF1</i>            | 1.21 | 0.0002   | 0.0068   |
| TC0200014672.hg.1 | <i>NR4A2</i>              | 1.21 | 5.04E-05 | 0.0023   |
| TC0300010329.hg.1 | <i>NUP210</i>             | 1.2  | 7.42E-07 | 0.0001   |
| TC0600012542.hg.1 | <i>UBE2J1</i>             | 1.2  | 2.94E-06 | 0.0003   |
| TC1700007254.hg.1 | <i>DHRS7B</i>             | 1.2  | 1.83E-05 | 0.0011   |
| TC0Y00006882.hg.1 | <i>SLC25A6</i>            | 1.2  | 3.02E-05 | 0.0016   |
| TC0500012599.hg.1 | <i>ADAM19</i>             | 1.2  | 0.0007   | 0.0140   |
| TC1100012422.hg.1 | <i>APOA4</i>              | 1.2  | 0.0010   | 0.0180   |
| TC0300013417.hg.1 | <i>LIPH</i>               | 1.19 | 7.65E-06 | 0.0006   |
| TC0X00010675.hg.1 | <i>CUL4B</i>              | 1.19 | 5.41E-06 | 0.0005   |
| TC0300007290.hg.1 | <i>KLHL18</i>             | 1.19 | 2.95E-05 | 0.0016   |
| TC0100016971.hg.1 | <i>ADIPOR1</i>            | 1.19 | 8.27E-07 | 0.0001   |
| TC0800012323.hg.1 | <i>CA13</i>               | 1.18 | 1.62E-05 | 0.0010   |
| TC2000008815.hg.1 | <i>BCL2L1</i>             | 1.18 | 5.53E-06 | 0.0005   |
| TC0600007311.hg.1 | <i>HMGN4</i>              | 1.17 | 1.58E-06 | 0.0002   |
| TC1700009277.hg.1 | <i>TBCD</i>               | 1.17 | 8.32E-06 | 0.0006   |
| TC0100010102.hg.1 | <i>FLAD1</i>              | 1.17 | 1.04E-05 | 0.0007   |
| TC0500006822.hg.1 | <i>OTULIN</i>             | 1.17 | 0.0002   | 0.0058   |
| TC2000008268.hg.1 | <i>SLC23A2</i>            | 1.17 | 2.50E-05 | 0.0014   |
| TC1000008431.hg.1 | <i>PCGF5</i>              | 1.16 | 1.76E-06 | 0.0002   |
| TC1600008226.hg.1 | <i>NIP7</i>               | 1.16 | 2.91E-06 | 0.0003   |
| TC0300013866.hg.1 | <i>ALG1L2</i>             | 1.16 | 0.0002   | 0.0064   |
| TC0300008331.hg.1 | <i>ABHD10</i>             | 1.16 | 4.52E-06 | 0.0004   |
| TC0100012846.hg.1 | <i>DFFA</i>               | 1.16 | 2.91E-05 | 0.0016   |
| TC0300009202.hg.1 | <i>MBNL1</i>              | 1.15 | 1.48E-06 | 0.0002   |
| TC1700009954.hg.1 | <i>TOM1L2</i>             | 1.15 | 8.71E-05 | 0.0033   |
| TC0600014140.hg.1 | <i>PRIM2</i>              | 1.15 | 0.0068   | 0.0702   |

|                   |                                            |      |          |        |
|-------------------|--------------------------------------------|------|----------|--------|
| TC1700008886.hg.1 | <i>SLC16A5</i>                             | 1.14 | 2.99E-05 | 0.0016 |
| TC1200009416.hg.1 | <i>RAN</i>                                 | 1.14 | 3.01E-06 | 0.0003 |
| TC1300008487.hg.1 | <i>SLC7A1</i>                              | 1.14 | 2.32E-05 | 0.0013 |
| TC0900006881.hg.1 | <i>IFT74</i>                               | 1.14 | 0.0028   | 0.0374 |
| TC0600011870.hg.1 | <i>DNPB1</i>                               | 1.14 | 1.32E-05 | 0.0009 |
| TC1900011684.hg.1 | <i>BABAM1</i>                              | 1.14 | 0.0002   | 0.0063 |
| TC1600007887.hg.1 | <i>RBL2</i>                                | 1.13 | 9.83E-06 | 0.0007 |
| TC0200013114.hg.1 | <i>M1AP</i>                                | 1.13 | 1.41E-05 | 0.0009 |
| TC0900009489.hg.1 | <i>GLDC</i>                                | 1.13 | 0.0042   | 0.0492 |
| TC0100013226.hg.1 | <i>USP48</i>                               | 1.13 | 7.00E-06 | 0.0006 |
| TC0700006618.hg.1 | <i>WIPI2</i>                               | 1.13 | 6.58E-05 | 0.0028 |
| TC0600014348.hg.1 | <i>NHSL1</i>                               | 1.13 | 0.0001   | 0.0046 |
| TC1100011128.hg.1 | <i>ATL3</i>                                | 1.13 | 3.49E-05 | 0.0018 |
| TC1100009973.hg.1 | <i>ARFIP2</i>                              | 1.13 | 0.0003   | 0.0071 |
| TC0100015921.hg.1 | <i>ADAR</i>                                | 1.12 | 6.42E-06 | 0.0005 |
| TC1900009204.hg.1 | <i>MOB3A</i>                               | 1.12 | 1.25E-06 | 0.0002 |
| TC0200014899.hg.1 | <i>METTL8</i>                              | 1.12 | 3.24E-05 | 0.0017 |
| TC1500007518.hg.1 | <i>RAB8B</i>                               | 1.11 | 0.0002   | 0.0054 |
| TC0300007566.hg.1 | <i>SPATA12</i>                             | 1.11 | 0.0053   | 0.0589 |
| TC1700007918.hg.1 | <i>AOC2</i>                                | 1.11 | 0.0070   | 0.0711 |
| TC1600010181.hg.1 | <i>NETO2</i>                               | 1.11 | 1.88E-06 | 0.0002 |
| TC0700012798.hg.1 | <i>KDM7A</i>                               | 1.11 | 7.79E-06 | 0.0006 |
| TC1100012681.hg.1 | <i>SIAE</i>                                | 1.11 | 8.10E-06 | 0.0006 |
| TC0700011550.hg.1 | <i>POM121C</i>                             | 1.1  | 1.22E-05 | 0.0009 |
| TC0600014148.hg.1 | <i>CYB5R4</i>                              | 1.1  | 3.41E-05 | 0.0017 |
| TC1100009824.hg.1 | <i>CARS</i>                                | 1.1  | 0.0100   | 0.0907 |
| TC1900006488.hg.1 | <i>PTBP1; MIR4745</i>                      | 1.1  | 1.93E-06 | 0.0002 |
| TC1600011401.hg.1 | <i>COQ9</i>                                | 1.1  | 3.22E-05 | 0.0017 |
| TC1600007022.hg.1 | <i>ABCC1</i>                               | 1.1  | 5.86E-05 | 0.0026 |
| TC0400011414.hg.1 | <i>TRMT10A</i>                             | 1.1  | 0.0016   | 0.0243 |
| TC0400007593.hg.1 | <i>SRP72</i>                               | 1.09 | 1.30E-05 | 0.0009 |
| TC0700009337.hg.1 | <i>C7orf55-LUC7L2;<br/>LUC7L2; C7orf55</i> | 1.09 | 1.55E-05 | 0.0010 |
| TC0900008891.hg.1 | <i>LRRC8A</i>                              | 1.09 | 6.89E-06 | 0.0006 |
| TC0200013746.hg.1 | <i>TGFBRAP1</i>                            | 1.09 | 2.04E-05 | 0.0012 |
| TC0200016767.hg.1 | <i>MREG</i>                                | 1.09 | 3.16E-05 | 0.0017 |
| TC0500011984.hg.1 | <i>HINT1</i>                               | 1.09 | 0.0002   | 0.0061 |
| TC0400009746.hg.1 | <i>SLBP</i>                                | 1.09 | 0.0005   | 0.0109 |
| TC0200013257.hg.1 | <i>TGOLN2</i>                              | 1.08 | 0.0001   | 0.0040 |
| TC0400011721.hg.1 | <i>MAD2L1</i>                              | 1.08 | 0.0005   | 0.0109 |
| TC2200007904.hg.1 | <i>ATP6V1E1</i>                            | 1.08 | 0.0014   | 0.0229 |
| TC0200007590.hg.1 | <i>CHAC2</i>                               | 1.08 | 0.0030   | 0.0388 |
| TC1600011350.hg.1 | <i>PMM2</i>                                | 1.08 | 1.51E-05 | 0.0010 |
| TC0100012454.hg.1 | <i>SDF4</i>                                | 1.08 | 1.67E-05 | 0.0010 |
| TC1500010878.hg.1 | <i>VWA9</i>                                | 1.08 | 2.35E-06 | 0.0003 |
| TC1500010660.hg.1 | <i>PCSK6</i>                               | 1.08 | 0.0004   | 0.0089 |
| TC0500012059.hg.1 | <i>VDAC1</i>                               | 1.07 | 8.54E-07 | 0.0001 |

|                   |                        |      |          |        |
|-------------------|------------------------|------|----------|--------|
| TC2100008297.hg.1 | <i>SIK1</i>            | 1.07 | 9.50E-05 | 0.0036 |
| TC0100009176.hg.1 | <i>SNX7</i>            | 1.07 | 9.60E-05 | 0.0036 |
| TC1200006561.hg.1 | <i>RAD51AP1</i>        | 1.07 | 0.0001   | 0.0042 |
| TC1200008544.hg.1 | <i>NEDD1</i>           | 1.07 | 0.0008   | 0.0153 |
| TC0200007363.hg.1 | <i>MTA3</i>            | 1.07 | 4.25E-05 | 0.0021 |
| TC0400008331.hg.1 | <i>NPNT</i>            | 1.07 | 0.0304   | 0.1845 |
| TC1600006628.hg.1 | <i>KCTD5</i>           | 1.06 | 3.74E-06 | 0.0004 |
| TC0700011575.hg.1 | <i>POMZP3</i>          | 1.06 | 1.60E-05 | 0.0010 |
| TC2000007016.hg.1 | <i>GINS1</i>           | 1.06 | 9.94E-06 | 0.0007 |
| TC0300008518.hg.1 | <i>GTF2E1</i>          | 1.06 | 1.31E-05 | 0.0009 |
| TC1200010971.hg.1 | <i>DCTN2</i>           | 1.06 | 1.61E-05 | 0.0010 |
| TC0200013104.hg.1 | <i>MOGS</i>            | 1.06 | 2.42E-05 | 0.0014 |
| TC1200009457.hg.1 | <i>ULK1</i>            | 1.06 | 3.49E-05 | 0.0018 |
| TC2000009823.hg.1 | <i>STMN3</i>           | 1.06 | 0.0006   | 0.0133 |
| TC1000012490.hg.1 | <i>PI4K2A</i>          | 1.05 | 2.25E-05 | 0.0013 |
| TC1200008920.hg.1 | <i>OAS3</i>            | 1.05 | 2.58E-05 | 0.0014 |
| TC0400008876.hg.1 | <i>USP38</i>           | 1.05 | 0.0003   | 0.0071 |
| TC1200007706.hg.1 | <i>MFSD5</i>           | 1.05 | 0.0009   | 0.0163 |
| TC1200012161.hg.1 | <i>TRIAP1</i>          | 1.05 | 0.0017   | 0.0259 |
| TC0100008978.hg.1 | <i>LRRC8B</i>          | 1.05 | 0.0037   | 0.0450 |
| TC2000009965.hg.1 | <i>FKBP1A; MIR6869</i> | 1.05 | 6.25E-06 | 0.0005 |
| TC0X00008908.hg.1 | <i>SLC25A6</i>         | 1.04 | 4.14E-05 | 0.0020 |
| TC0900011035.hg.1 | <i>TMEM246</i>         | 1.04 | 6.69E-05 | 0.0028 |
| TC1500009236.hg.1 | <i>MFAP1</i>           | 1.04 | 8.52E-06 | 0.0007 |
| TC2100008098.hg.1 | <i>DSCR3</i>           | 1.04 | 9.58E-06 | 0.0007 |
| TC0100016625.hg.1 | <i>GLUL</i>            | 1.04 | 0.0001   | 0.0040 |
| TC1100011606.hg.1 | <i>C2CD3</i>           | 1.04 | 0.0003   | 0.0071 |
| TC0800012451.hg.1 | <i>EIF3E</i>           | 1.03 | 3.98E-06 | 0.0004 |
| TC1100012019.hg.1 | <i>SESN3</i>           | 1.03 | 0.0011   | 0.0190 |
| TC1100013012.hg.1 | <i>STX3</i>            | 1.03 | 1.87E-06 | 0.0002 |
| TC0500007668.hg.1 | <i>CDK7</i>            | 1.03 | 1.60E-05 | 0.0010 |
| TC2200007114.hg.1 | <i>YWHAH</i>           | 1.03 | 2.28E-05 | 0.0013 |
| TC2200007677.hg.1 | <i>TBC1D22A</i>        | 1.03 | 0.0005   | 0.0111 |
| TC1300006503.hg.1 | <i>IFT88</i>           | 1.03 | 0.0006   | 0.0133 |
| TC1600008301.hg.1 | <i>CALB2</i>           | 1.03 | 0.0059   | 0.0633 |
| TC1600011545.hg.1 | <i>PLLP</i>            | 1.03 | 0.0137   | 0.1129 |
| TC0500009837.hg.1 | <i>SLC12A7</i>         | 1.02 | 6.18E-05 | 0.0027 |
| TC0X00008108.hg.1 | <i>TMEM164</i>         | 1.02 | 0.0084   | 0.0802 |
| TC0300010357.hg.1 | <i>CHCHD4</i>          | 1.02 | 4.94E-05 | 0.0023 |
| TC0X00009007.hg.1 | <i>PUDP</i>            | 1.01 | 0.0004   | 0.0100 |
| TC1900007270.hg.1 | <i>KLF2</i>            | 1.01 | 0.0004   | 0.0101 |
| TC0X00008844.hg.1 | <i>IKBKG</i>           | 1.01 | 0.0030   | 0.0387 |
| TC1100010893.hg.1 | <i>SLC43A1</i>         | 1.01 | 0.0072   | 0.0723 |
| TC0100014918.hg.1 | <i>SETSIP</i>          | 1.01 | 0.0073   | 0.0732 |
| TC2200008611.hg.1 | <i>EIF3D</i>           | 1.01 | 9.82E-06 | 0.0007 |
| TC1600011329.hg.1 | <i>TBC1D24</i>         | 1.01 | 1.52E-05 | 0.0010 |

|                        |                            |       |          |        |
|------------------------|----------------------------|-------|----------|--------|
| TC1400006821.hg.1      | <i>G2E3</i>                | 1.01  | 0.0107   | 0.0955 |
| TC1400009184.hg.1      | <i>TXNDC16</i>             | 1.01  | 0.0115   | 0.1001 |
| TC1100013054.hg.1      | <i>RAD9A</i>               | 1     | 0.0002   | 0.0061 |
| TC0900012176.hg.1      | <i>URM1</i>                | 1     | 4.10E-05 | 0.0020 |
| TC0100015049.hg.1      | <i>FRRS1</i>               | 1     | 0.0004   | 0.0104 |
| TC0X00010837.hg.1      | <i>MBNL3</i>               | -0.99 | 5.73E-05 | 0.0026 |
| TC1500010018.hg.1      | <i>SEMA7A</i>              | -0.99 | 8.15E-05 | 0.0032 |
| TC0100006681.hg.1      | <i>RNF207</i>              | -1    | 0.0126   | 0.1064 |
| TC1200008843.hg.1      | <i>FAM216A</i>             | -1.01 | 0.0002   | 0.0061 |
| TC0600007821.hg.1      | <i>LHFPL5</i>              | -1.01 | 0.0014   | 0.0224 |
| TC0600011252.hg.1      | <i>ZSCAN31</i>             | -1.01 | 0.0328   | 0.1934 |
| TC1700011313.hg.1      | <i>USP32</i>               | -1.01 | 1.19E-05 | 0.0008 |
| TC0200015002.hg.1      | <i>CHN1</i>                | -1.01 | 5.02E-05 | 0.0023 |
| TC1200007887.hg.1      | <i>MBD6</i>                | -1.01 | 7.63E-05 | 0.0031 |
| TC0300013104.hg.1      | <i>EIF5A2</i>              | -1.01 | 0.0001   | 0.0037 |
| TC0800007335.hg.1      | <i>LETM2</i>               | -1.01 | 0.0001   | 0.0037 |
| TC0400007495.hg.1      | <i>DCUN1D4</i>             | -1.01 | 0.0002   | 0.0053 |
| TC1100006831.hg.1      | <i>ADM</i>                 | -1.01 | 0.0004   | 0.0090 |
| TC1200010229.hg.1      | <i>PTHLH</i>               | -1.01 | 0.0049   | 0.0558 |
| TC0500013089.hg.1      | <i>GFPT2</i>               | -1.01 | 0.0357   | 0.2041 |
| TC0700011518.hg.1      | <i>GTF2IRD2; GTF2IRD2B</i> | -1.02 | 3.92E-06 | 0.0004 |
| TC0800009927.hg.1      | <i>EBF2</i>                | -1.02 | 0.0001   | 0.0037 |
| TC1700011919.hg.1      | <i>CEP295NL; TIMP2</i>     | -1.02 | 3.62E-06 | 0.0004 |
| TC0800010918.hg.1      | <i>ZNF704</i>              | -1.02 | 4.64E-05 | 0.0022 |
| TC0500008835.hg.1      | <i>CXXC5</i>               | -1.02 | 0.0001   | 0.0048 |
| TC0400012952.hg.1      | <i>BDH2</i>                | -1.02 | 0.0002   | 0.0069 |
| TC1000006466.hg.1      | <i>WDR37</i>               | -1.02 | 0.0006   | 0.0133 |
| TC1900006685.hg.1      | <i>FSD1</i>                | -1.02 | 0.0045   | 0.0519 |
| TC1600006537.hg.1      | <i>BAIAP3</i>              | -1.02 | 0.0062   | 0.0656 |
| TC0200010416.hg.1      | <i>SPATS2L</i>             | -1.02 | 0.0286   | 0.1783 |
| TC1300007774.hg.1      | <i>MBNL2</i>               | -1.02 | 5.06E-06 | 0.0005 |
| TC0200016717.hg.1      | <i>TBC1D8</i>              | -1.02 | 0.0001   | 0.0043 |
| TC2200007312.hg.1      | <i>LGALS1</i>              | -1.02 | 0.0004   | 0.0100 |
| TC1900012025.hg.1      | <i>ZNF28</i>               | -1.02 | 0.0163   | 0.1257 |
| TC0500012909.hg.1      | <i>DRD1</i>                | -1.03 | 0.0002   | 0.0068 |
| TC1200010284.hg.1      | <i>DENND5B</i>             | -1.03 | 0.0006   | 0.0129 |
| TC0400011144.hg.1      | <i>ANTXR2</i>              | -1.03 | 0.0011   | 0.0191 |
| TC1000011938.hg.1      | <i>SHTN1</i>               | -1.03 | 3.37E-05 | 0.0017 |
| TC2200008799.hg.1      | <i>ST13</i>                | -1.04 | 2.49E-06 | 0.0003 |
| 3Unmapped00000818.hg.1 | <i>F10</i>                 | -1.04 | 3.02E-05 | 0.0016 |
| TC1600011517.hg.1      | <i>DOC2A</i>               | -1.04 | 6.92E-05 | 0.0029 |
| TC0300012665.hg.1      | <i>XRN1</i>                | -1.04 | 0.0035   | 0.0436 |
| TC1900010716.hg.1      | <i>ADCK4</i>               | -1.04 | 0.0104   | 0.0931 |
| TC1900007399.hg.1      | <i>TMEM59L</i>             | -1.04 | 1.29E-05 | 0.0009 |
| TC1800008399.hg.1      | <i>B4GALT6</i>             | -1.04 | 6.59E-05 | 0.0028 |
| TC0600010002.hg.1      | <i>SYNJ2</i>               | -1.04 | 0.0008   | 0.0151 |

|                      |                       |       |          |        |
|----------------------|-----------------------|-------|----------|--------|
| TC1600007811.hg.1    | <i>PAPD5</i>          | -1.04 | 0.0011   | 0.0190 |
| TC0300007296.hg.1    | <i>SCAP</i>           | -1.04 | 0.0226   | 0.1538 |
| TC0700012813.hg.1    | <i>DENND2A</i>        | -1.04 | 0.0331   | 0.1944 |
| TC0300011135.hg.1    | <i>VPRBP</i>          | -1.05 | 0.0001   | 0.0043 |
| TC0X00010136.hg.1    | <i>TAF9B</i>          | -1.05 | 0.0003   | 0.0078 |
| TC1600006593.hg.1    | <i>RAB26</i>          | -1.05 | 1.65E-06 | 0.0002 |
| TC0300012029.hg.1    | <i>NAA50</i>          | -1.05 | 1.71E-06 | 0.0002 |
| TC0500011751.hg.1    | <i>FEM1C</i>          | -1.05 | 6.50E-06 | 0.0005 |
| TC0100013339.hg.1    | <i>RUNX3</i>          | -1.05 | 1.33E-05 | 0.0009 |
| TC1000008954.hg.1    | <i>CASP7</i>          | -1.05 | 4.49E-05 | 0.0022 |
| TC0200011171.hg.1    | <i>SH3BP4</i>         | -1.05 | 0.0003   | 0.0072 |
| TC0400007868.hg.1    | <i>PARM1</i>          | -1.05 | 0.0028   | 0.0372 |
| TC0100012222.hg.1    | <i>DESI2</i>          | -1.05 | 3.93E-06 | 0.0004 |
| TC0800010285.hg.1    | <i>SLC20A2</i>        | -1.06 | 0.0001   | 0.0043 |
| TC1400008382.hg.1    | <i>TNFAIP2</i>        | -1.06 | 0.0005   | 0.0107 |
| TC0900007518.hg.1    | <i>MAMDC2</i>         | -1.06 | 0.0005   | 0.0110 |
| TC0700008367.hg.1    | <i>PEG10</i>          | -1.06 | 0.0212   | 0.1488 |
| TC0500007337.hg.1    | <i>PARP8</i>          | -1.06 | 4.20E-06 | 0.0004 |
| TC1700012457.hg.1    | <i>AXIN2</i>          | -1.06 | 9.18E-06 | 0.0007 |
| TC1100009330.hg.1    | <i>UBASH3B</i>        | -1.06 | 6.12E-05 | 0.0027 |
| TC1100012583.hg.1    | <i>BLID; MIR100HG</i> | -1.06 | 8.31E-05 | 0.0032 |
| TC0900010386.hg.1    | <i>TMEM2</i>          | -1.06 | 9.33E-05 | 0.0035 |
| TC1100009026.hg.1    | <i>SIK2</i>           | -1.06 | 0.0002   | 0.0066 |
| TC1000008658.hg.1    | <i>PAX2</i>           | -1.06 | 0.0006   | 0.0133 |
| TC1900011770.hg.1    | <i>C5AR1</i>          | -1.06 | 0.0010   | 0.0178 |
| TC0300012339.hg.1    | <i>GATA2</i>          | -1.06 | 0.0024   | 0.0334 |
| TC1500010162.hg.1    | <i>RASGRF1</i>        | -1.06 | 0.0038   | 0.0459 |
| TC1700006744.hg.1    | <i>NLGN2</i>          | -1.06 | 0.0184   | 0.1367 |
| TC0100017761.hg.1    | <i>PCNXL2</i>         | -1.06 | 0.0199   | 0.1432 |
| TC1000008354.hg.1    | <i>PAPSS2</i>         | -1.07 | 0.0007   | 0.0143 |
| TC0100018236.hg.1    | <i>ACADM</i>          | -1.07 | 1.12E-05 | 0.0008 |
| TC1900007290.hg.1    | <i>TMEM38A</i>        | -1.07 | 9.37E-05 | 0.0035 |
| TC0500013140.hg.1    | <i>AHRR; PDCD6</i>    | -1.07 | 0.0015   | 0.0237 |
| TC1700010996.hg.1    | <i>HOXB8</i>          | -1.07 | 2.69E-05 | 0.0015 |
| TC0800011881.hg.1    | <i>NDRG1</i>          | -1.07 | 0.0010   | 0.0182 |
| TC0100010393.hg.1    | <i>RGS4</i>           | -1.08 | 0.0002   | 0.0056 |
| TC0900011501.hg.1    | <i>NR6A1</i>          | -1.08 | 0.0002   | 0.0069 |
| TC0900011981.hg.1    | <i>NOTCH1</i>         | -1.08 | 0.0111   | 0.0977 |
| TC0X00010877.hg.1    | <i>FAM122B</i>        | -1.08 | 5.91E-06 | 0.0005 |
| TC1100013059.hg.1    | <i>MYEOV</i>          | -1.08 | 1.35E-05 | 0.0009 |
| TC1900008015.hg.1    | <i>SPRED3</i>         | -1.08 | 0.0008   | 0.0157 |
| TC0800011634.hg.1    | <i>SNTB1</i>          | -1.09 | 1.02E-06 | 0.0001 |
| TC0300014021.hg.1    | <i>CPOX</i>           | -1.09 | 1.13E-05 | 0.0008 |
| TC1500009457.hg.1    | <i>MYO5A</i>          | -1.09 | 0.0013   | 0.0211 |
| TC0300012935.hg.1    | <i>SHOX2</i>          | -1.09 | 9.25E-06 | 0.0007 |
| 3Unmapped00000398.hg | <i>KAT6B</i>          | -1.09 | 1.61E-05 | 0.0010 |

|                   |                 |       |          |        |
|-------------------|-----------------|-------|----------|--------|
| TC2000006721.hg.1 | <i>BTBD3</i>    | -1.09 | 7.07E-05 | 0.0030 |
| TC0900010920.hg.1 | <i>AAED1</i>    | -1.09 | 9.29E-05 | 0.0035 |
| TC0800007221.hg.1 | <i>NRG1</i>     | -1.09 | 0.0002   | 0.0049 |
| TC1900011233.hg.1 | <i>KLK10</i>    | -1.09 | 0.0004   | 0.0101 |
| TC1100010897.hg.1 | <i>UBE2L6</i>   | -1.09 | 0.0011   | 0.0194 |
| TC1100013223.hg.1 | <i>CARD17</i>   | -1.09 | 0.0016   | 0.0244 |
| TC0400007853.hg.1 | <i>EREG</i>     | -1.1  | 1.51E-06 | 0.0002 |
| TC2100008385.hg.1 | <i>SUMO3</i>    | -1.1  | 6.11E-05 | 0.0027 |
| TC0300006791.hg.1 | <i>KAT2B</i>    | -1.1  | 8.45E-05 | 0.0033 |
| TC1600008034.hg.1 | <i>NDRG4</i>    | -1.1  | 0.0003   | 0.0087 |
| TC1500009508.hg.1 | <i>NEDD4</i>    | -1.1  | 0.0008   | 0.0151 |
| TC0800009735.hg.1 | <i>MTUS1</i>    | -1.1  | 2.49E-05 | 0.0014 |
| TC0700013468.hg.1 | <i>NDUFB2</i>   | -1.1  | 4.19E-05 | 0.0020 |
| TC0200012713.hg.1 | <i>BCL11A</i>   | -1.1  | 0.0004   | 0.0095 |
| TC0500008539.hg.1 | <i>GRAMD3</i>   | -1.1  | 0.0307   | 0.1858 |
| TC0700011298.hg.1 | <i>ZNF680</i>   | -1.11 | 1.04E-05 | 0.0007 |
| TC1700010540.hg.1 | <i>PCGF2</i>    | -1.11 | 7.15E-06 | 0.0006 |
| TC0500010615.hg.1 | <i>SEPP1</i>    | -1.11 | 0.0011   | 0.0190 |
| TC1100012230.hg.1 | <i>EXPH5</i>    | -1.11 | 3.74E-06 | 0.0004 |
| TC0100011096.hg.1 | <i>NEK7</i>     | -1.11 | 1.03E-05 | 0.0007 |
| TC0200009443.hg.1 | <i>R3HDM1</i>   | -1.11 | 5.46E-05 | 0.0025 |
| TC0100010112.hg.1 | <i>SLC50A1</i>  | -1.12 | 4.66E-06 | 0.0004 |
| TC0100007789.hg.1 | <i>ago-03</i>   | -1.12 | 5.45E-05 | 0.0025 |
| TC0500008479.hg.1 | <i>SNX2</i>     | -1.12 | 0.0002   | 0.0061 |
| TC1700008862.hg.1 | <i>RAB37</i>    | -1.12 | 3.10E-05 | 0.0016 |
| TC0500009061.hg.1 | <i>PCYOX1L</i>  | -1.12 | 0.0001   | 0.0047 |
| TC1000010482.hg.1 | <i>C10orf10</i> | -1.12 | 4.89E-05 | 0.0023 |
| TC0900008793.hg.1 | <i>ZBTB34</i>   | -1.12 | 0.0015   | 0.0237 |
| TC0100018454.hg.1 | <i>ARHGAP29</i> | -1.13 | 3.21E-06 | 0.0003 |
| TC1700012185.hg.1 | <i>TNFSF12</i>  | -1.13 | 0.0007   | 0.0135 |
| TC1300008439.hg.1 | <i>MTIF3</i>    | -1.13 | 0.0080   | 0.0777 |
| TC0500009488.hg.1 | <i>CREBRF</i>   | -1.14 | 3.54E-06 | 0.0004 |
| TC1900010433.hg.1 | <i>SCGB2B2</i>  | -1.14 | 0.0310   | 0.1868 |
| TC1600011317.hg.1 | <i>NME4</i>     | -1.14 | 9.46E-06 | 0.0007 |
| TC0800006496.hg.1 | <i>MYOM2</i>    | -1.14 | 3.36E-05 | 0.0017 |
| TC1900009431.hg.1 | <i>SLC25A23</i> | -1.14 | 5.24E-05 | 0.0024 |
| TC1900011029.hg.1 | <i>MEIS3</i>    | -1.14 | 6.04E-05 | 0.0027 |
| TC0400011180.hg.1 | <i>SCD5</i>     | -1.14 | 0.0002   | 0.0055 |
| TC1200008535.hg.1 | <i>ELK3</i>     | -1.14 | 0.0002   | 0.0061 |
| TC1700012191.hg.1 | <i>CD68</i>     | -1.14 | 0.0003   | 0.0072 |
| TC2100008562.hg.1 | <i>RUNX1</i>    | -1.14 | 5.11E-06 | 0.0005 |
| TC1900010807.hg.1 | <i>CEACAM1</i>  | -1.15 | 1.86E-05 | 0.0011 |
| TC0100015572.hg.1 | <i>SRGAP2B</i>  | -1.15 | 1.91E-05 | 0.0011 |
| TC0500012210.hg.1 | <i>TMEM173</i>  | -1.15 | 7.22E-07 | 0.0001 |
| TC1400008705.hg.1 | <i>SLC7A8</i>   | -1.15 | 2.61E-05 | 0.0014 |
| TC0400008879.hg.1 | <i>GAB1</i>     | -1.15 | 8.25E-05 | 0.0032 |

|                   |                       |       |          |          |
|-------------------|-----------------------|-------|----------|----------|
| TC0100016018.hg.1 | <i>CRABP2</i>         | -1.16 | 2.11E-06 | 0.0002   |
| TC1000011659.hg.1 | <i>MGEA5</i>          | -1.16 | 7.47E-07 | 0.0001   |
| TC0100010121.hg.1 | <i>HCN3</i>           | -1.16 | 1.65E-05 | 0.0010   |
| TC1300008497.hg.1 | <i>UBL3</i>           | -1.16 | 0.0005   | 0.0111   |
| TC0X00010207.hg.1 | <i>POF1B</i>          | -1.16 | 0.0083   | 0.0798   |
| TC0400009033.hg.1 | <i>TRIM2</i>          | -1.16 | 3.05E-06 | 0.0003   |
| TC0400007938.hg.1 | <i>BMP2K</i>          | -1.17 | 3.46E-06 | 0.0004   |
| TC1100013144.hg.1 | <i>ZBED5</i>          | -1.17 | 1.67E-05 | 0.0010   |
| TC1000011081.hg.1 | <i>ZNF503</i>         | -1.17 | 6.77E-05 | 0.0029   |
| TC0900008150.hg.1 | <i>TMOD1</i>          | -1.17 | 0.0002   | 0.0056   |
| TC0100012921.hg.1 | <i>DHRS3; MIR6730</i> | -1.17 | 0.0040   | 0.0479   |
| TC0100010755.hg.1 | <i>RALGPS2</i>        | -1.17 | 3.16E-05 | 0.0017   |
| TC1200008597.hg.1 | <i>GAS2L3</i>         | -1.17 | 6.55E-05 | 0.0028   |
| TC1200011786.hg.1 | <i>NUAK1</i>          | -1.17 | 0.0007   | 0.0142   |
| TC0300007572.hg.1 | <i>APPL1</i>          | -1.18 | 0.0003   | 0.0078   |
| TC1700012279.hg.1 | <i>HOXB-AS3</i>       | -1.18 | 0.0042   | 0.0499   |
| TC0100016678.hg.1 | <i>FAM129A</i>        | -1.18 | 0.0051   | 0.0574   |
| TC0100017860.hg.1 | <i>HEATR1</i>         | -1.18 | 3.78E-06 | 0.0004   |
| TC1100011602.hg.1 | <i>UCP2</i>           | -1.18 | 0.0003   | 0.0085   |
| TC1200010252.hg.1 | <i>TMTC1</i>          | -1.19 | 5.91E-05 | 0.0026   |
| TC1200010569.hg.1 | <i>ASB8</i>           | -1.19 | 0.0237   | 0.1585   |
| TC1000008585.hg.1 | <i>MARVELD1</i>       | -1.2  | 1.64E-05 | 0.0010   |
| TC1000007641.hg.1 | <i>DKK1</i>           | -1.2  | 2.61E-05 | 0.0014   |
| TC0700013531.hg.1 | <i>HOXA6</i>          | -1.2  | 9.77E-05 | 0.0036   |
| TC1900010743.hg.1 | <i>TGFB1</i>          | -1.2  | 0.0006   | 0.0121   |
| TC0200008803.hg.1 | <i>GCC2</i>           | -1.2  | 0.0008   | 0.0149   |
| TC1400009194.hg.1 | <i>FERMT2</i>         | -1.2  | 0.0008   | 0.0158   |
| TC1900011231.hg.1 | <i>KLK7</i>           | -1.2  | 1.83E-06 | 0.0002   |
| TC1000006802.hg.1 | <i>CAMK1D</i>         | -1.2  | 8.34E-06 | 0.0006   |
| TC0400011643.hg.1 | <i>CAMK2D</i>         | -1.2  | 9.43E-06 | 0.0007   |
| TC2200009281.hg.1 | <i>PNPLA3</i>         | -1.2  | 0.0088   | 0.0833   |
| TC1100009431.hg.1 | <i>PATE4</i>          | -1.21 | 0.0053   | 0.0585   |
| TC1900011153.hg.1 | <i>RRAS</i>           | -1.22 | 0.0004   | 0.0100   |
| TC0400008450.hg.1 | <i>ANK2</i>           | -1.23 | 3.15E-05 | 0.0017   |
| TC1700012276.hg.1 | <i>PNPO</i>           | -1.23 | 0.0002   | 0.0069   |
| TC2000009058.hg.1 | <i>TGM2</i>           | -1.23 | 8.99E-05 | 0.0034   |
| TC1700010604.hg.1 | <i>NR1D1</i>          | -1.24 | 6.07E-06 | 0.0005   |
| TC0100008594.hg.1 | <i>ROR1</i>           | -1.24 | 7.52E-05 | 0.0031   |
| TC0200007237.hg.1 | <i>CRIM1</i>          | -1.24 | 5.25E-06 | 0.0005   |
| TC1900011194.hg.1 | <i>KCNC3</i>          | -1.24 | 0.0001   | 0.0038   |
| TC0X00011279.hg.1 | <i>TSPAN7</i>         | -1.24 | 0.0019   | 0.0282   |
| TC1000009792.hg.1 | <i>USP6NL</i>         | -1.24 | 3.22E-07 | 6.63E-05 |
| TC0700013371.hg.1 | <i>ZNF138</i>         | -1.25 | 8.18E-05 | 0.0032   |
| TC0800010524.hg.1 | <i>IMPAD1</i>         | -1.25 | 3.18E-07 | 6.63E-05 |
| TC0100014752.hg.1 | <i>GNG5</i>           | -1.25 | 7.23E-06 | 0.0006   |
| TC0800010282.hg.1 | <i>DKK4</i>           | -1.25 | 0.0001   | 0.0041   |



|                   |                  |       |          |          |
|-------------------|------------------|-------|----------|----------|
| TC1200006738.hg.1 | <i>KLRG1</i>     | -1.26 | 0.0007   | 0.0135   |
| TC0300010632.hg.1 | <i>OSBPL10</i>   | -1.26 | 2.16E-07 | 5.05E-05 |
| TC1300008983.hg.1 | <i>INTS6</i>     | -1.26 | 2.93E-07 | 6.35E-05 |
| TC1000009067.hg.1 | <i>GRK5</i>      | -1.27 | 9.15E-07 | 0.0001   |
| TC0100011364.hg.1 | <i>SRGAP2</i>    | -1.27 | 4.82E-06 | 0.0004   |
| TC2200006827.hg.1 | <i>GNAZ</i>      | -1.27 | 5.05E-05 | 0.0023   |
| TC1500007619.hg.1 | <i>SMAD6</i>     | -1.27 | 1.81E-05 | 0.0011   |
| TC1700010653.hg.1 | <i>KRTAP2-3</i>  | -1.27 | 8.52E-05 | 0.0033   |
| TC1900011996.hg.1 | <i>CGB8</i>      | -1.28 | 3.63E-06 | 0.0004   |
| TC0700010563.hg.1 | <i>HOXA7</i>     | -1.28 | 8.70E-06 | 0.0007   |
| TC1100007266.hg.1 | <i>PDHX</i>      | -1.28 | 3.40E-05 | 0.0017   |
| TC1700010657.hg.1 | <i>KRTAP4-12</i> | -1.29 | 2.92E-05 | 0.0016   |
| TC1400007168.hg.1 | <i>GPR137C</i>   | -1.29 | 0.0004   | 0.0090   |
| TC2200009153.hg.1 | <i>DENND6B</i>   | -1.29 | 0.0005   | 0.0119   |
| TC1100013131.hg.1 | <i>IGF2</i>      | -1.29 | 0.0006   | 0.0133   |
| TC1700007944.hg.1 | <i>TMEM106A</i>  | -1.3  | 7.64E-07 | 0.0001   |
| TC1700012434.hg.1 | <i>HOXB7</i>     | -1.3  | 6.02E-06 | 0.0005   |
| TC1000007199.hg.1 | <i>ZEB1</i>      | -1.31 | 5.48E-05 | 0.0025   |
| TC1100007507.hg.1 | <i>PTPRJ</i>     | -1.31 | 4.04E-07 | 7.60E-05 |
| TC0400011263.hg.1 | <i>SPARCL1</i>   | -1.31 | 1.97E-05 | 0.0012   |
| TC0X00008514.hg.1 | <i>DDX26B</i>    | -1.31 | 0.0002   | 0.0061   |
| TC1200008269.hg.1 | <i>NAV3</i>      | -1.32 | 6.42E-05 | 0.0028   |
| TC1000011661.hg.1 | <i>KCNIP2</i>    | -1.32 | 4.15E-07 | 7.74E-05 |
| TC0900007552.hg.1 | <i>GDA</i>       | -1.33 | 1.17E-07 | 3.38E-05 |
| TC1900006865.hg.1 | <i>TGFBR3L</i>   | -1.33 | 7.67E-06 | 0.0006   |
| TC1900011084.hg.1 | <i>DBP</i>       | -1.33 | 9.47E-07 | 0.0001   |
| TC0600011945.hg.1 | <i>RCAN2</i>     | -1.34 | 9.04E-07 | 0.0001   |
| TC1100008969.hg.1 | <i>ELMOD1</i>    | -1.34 | 5.72E-05 | 0.0026   |
| TC0600008697.hg.1 | <i>NT5E</i>      | -1.35 | 4.26E-05 | 0.0021   |
| TC0600009350.hg.1 | <i>RNF217</i>    | -1.35 | 7.46E-05 | 0.0031   |
| TC2200007489.hg.1 | <i>C22orf46</i>  | -1.35 | 1.99E-06 | 0.0002   |
| TC2000008242.hg.1 | <i>RNF24</i>     | -1.35 | 2.13E-06 | 0.0002   |
| TC0600014191.hg.1 | <i>SAMD5</i>     | -1.36 | 5.44E-07 | 9.33E-05 |
| TC1100011141.hg.1 | <i>RCOR2</i>     | -1.36 | 4.83E-05 | 0.0023   |
| TC0X00009215.hg.1 | <i>EIF1AX</i>    | -1.37 | 2.45E-06 | 0.0003   |
| TC1200010806.hg.1 | <i>MAP3K12</i>   | -1.37 | 9.77E-06 | 0.0007   |
| TC0100016833.hg.1 | <i>ZBTB41</i>    | -1.38 | 1.53E-06 | 0.0002   |
| TC0X00009057.hg.1 | <i>MID1</i>      | -1.38 | 2.84E-06 | 0.0003   |
| TC1000007954.hg.1 | <i>SLC29A3</i>   | -1.38 | 1.19E-05 | 0.0008   |
| TC1100011888.hg.1 | <i>CTSC</i>      | -1.39 | 3.18E-05 | 0.0017   |
| TC1000007761.hg.1 | <i>ARID5B</i>    | -1.4  | 1.77E-06 | 0.0002   |
| TC0300012980.hg.1 | <i>SPTSSB</i>    | -1.4  | 4.42E-06 | 0.0004   |
| TC1000010273.hg.1 | <i>NRP1</i>      | -1.4  | 9.82E-06 | 0.0007   |
| TC1400009353.hg.1 | <i>SIX4</i>      | -1.4  | 6.53E-05 | 0.0028   |
| TC0300012764.hg.1 | <i>HLTF</i>      | -1.4  | 3.80E-06 | 0.0004   |
| TC1900009603.hg.1 | <i>OLFM2</i>     | -1.4  | 0.0004   | 0.0089   |

|                      |                            |       |          |          |
|----------------------|----------------------------|-------|----------|----------|
| TC1400007320.hg.1    | <i>DACT1</i>               | -1.41 | 7.16E-07 | 0.0001   |
| TC1100011833.hg.1    | <i>SYTL2</i>               | -1.41 | 2.90E-06 | 0.0003   |
| TC0100013796.hg.1    | <i>PABPC4</i>              | -1.41 | 1.50E-06 | 0.0002   |
| TC2000009955.hg.1    | <i>SLC2A4RG</i>            | -1.41 | 0.0004   | 0.0090   |
| TC0400009038.hg.1    | <i>KIAA0922</i>            | -1.41 | 2.23E-06 | 0.0003   |
| TC1200009734.hg.1    | <i>VAMP1</i>               | -1.42 | 1.14E-06 | 0.0002   |
| TC1400009006.hg.1    | <i>TRAPPC6B</i>            | -1.43 | 3.50E-07 | 6.84E-05 |
| TC1400009134.hg.1    | <i>SAV1</i>                | -1.43 | 2.57E-06 | 0.0003   |
| 3Unmapped00000049.hg | <i>PADI3</i>               | -1.43 | 6.44E-05 | 0.0028   |
| TC1200012711.hg.1    | <i>LINC00173</i>           | -1.44 | 0.0001   | 0.0047   |
| TC1900011067.hg.1    | <i>TMEM143</i>             | -1.44 | 3.52E-07 | 6.84E-05 |
| TC1100013130.hg.1    | <i>IGF2; INS-IGF2</i>      | -1.44 | 0.0003   | 0.0075   |
| TC0400010168.hg.1    | <i>LCORL</i>               | -1.45 | 3.35E-08 | 1.47E-05 |
| TC0300011259.hg.1    | <i>ARHGEF3</i>             | -1.46 | 3.68E-06 | 0.0004   |
| TC0X00010840.hg.1    | <i>HS6ST2</i>              | -1.46 | 6.38E-06 | 0.0005   |
| TC1700011558.hg.1    | <i>SLC16A6</i>             | -1.46 | 0.0001   | 0.0038   |
| TC1900010005.hg.1    | <i>RAB3A</i>               | -1.46 | 2.01E-05 | 0.0012   |
| TC1200007931.hg.1    | <i>SLC16A7</i>             | -1.46 | 8.15E-07 | 0.0001   |
| TC1400009481.hg.1    | <i>PLEK2</i>               | -1.47 | 5.41E-08 | 2.07E-05 |
| TC1700006524.hg.1    | <i>SERPINF1</i>            | -1.47 | 2.24E-07 | 5.17E-05 |
| TC0300013949.hg.1    | <i>SATB1</i>               | -1.47 | 2.10E-07 | 4.95E-05 |
| TC0200014694.hg.1    | <i>ACVR1C</i>              | -1.47 | 2.15E-05 | 0.0013   |
| TC1700010651.hg.1    | <i>KRTAP2-1</i>            | -1.47 | 0.0003   | 0.0072   |
| TC0300013108.hg.1    | <i>TNIK</i>                | -1.48 | 4.98E-08 | 2.05E-05 |
| TC0600008146.hg.1    | <i>RUNX2</i>               | -1.48 | 2.38E-07 | 5.43E-05 |
| TC1800007298.hg.1    | <i>LIPG</i>                | -1.48 | 2.09E-06 | 0.0002   |
| TC0600014192.hg.1    | <i>RP11-307P5.1; SAMD5</i> | -1.49 | 0.0003   | 0.0078   |
| TC0600011943.hg.1    | <i>ENPP5</i>               | -1.5  | 5.26E-08 | 2.07E-05 |
| TC0500010876.hg.1    | <i>SMIM15</i>              | -1.51 | 1.32E-07 | 3.69E-05 |
| TC1500006925.hg.1    | <i>THBS1</i>               | -1.51 | 2.36E-05 | 0.0013   |
| TC0200009955.hg.1    | <i>CYBRD1</i>              | -1.52 | 6.75E-07 | 0.0001   |
| TC1900008286.hg.1    | <i>BCAM</i>                | -1.52 | 7.55E-07 | 0.0001   |
| TC2200006883.hg.1    | <i>SUSD2</i>               | -1.52 | 0.0001   | 0.0038   |
| TC1300008609.hg.1    | <i>DCLK1</i>               | -1.52 | 1.77E-06 | 0.0002   |
| TC1200008028.hg.1    | <i>MSRB3</i>               | -1.52 | 1.62E-05 | 0.0010   |
| TC0500010540.hg.1    | <i>LIFR</i>                | -1.54 | 3.57E-06 | 0.0004   |
| TC0500012519.hg.1    | <i>SPARC</i>               | -1.54 | 5.00E-06 | 0.0004   |
| TC0700011318.hg.1    | <i>ERV3-1; ZNF117</i>      | -1.54 | 7.36E-06 | 0.0006   |
| TC1700012282.hg.1    | <i>SPATA20</i>             | -1.55 | 1.21E-07 | 3.46E-05 |
| TC1700010652.hg.1    | <i>KRTAP2-2</i>            | -1.57 | 8.72E-05 | 0.0033   |
| TC0600009019.hg.1    | <i>SOBP</i>                | -1.57 | 5.11E-06 | 0.0005   |
| TC0100011022.hg.1    | <i>RGS2</i>                | -1.59 | 4.26E-07 | 7.81E-05 |
| TC0300012781.hg.1    | <i>WWTR1</i>               | -1.59 | 5.81E-06 | 0.0005   |
| TC0X00007176.hg.1    | <i>SSX1</i>                | -1.59 | 0.0011   | 0.0187   |
| TC1600010978.hg.1    | <i>PKD1L2</i>              | -1.6  | 1.71E-05 | 0.0011   |
| TC1600011328.hg.1    | <i>NPW</i>                 | -1.6  | 6.37E-06 | 0.0005   |

|                   |                         |       |          |          |
|-------------------|-------------------------|-------|----------|----------|
| TC0600014111.hg.1 | <i>SYNGAP1; MIR5004</i> | -1.62 | 3.29E-07 | 6.66E-05 |
| TC1700012110.hg.1 | <i>SECTM1</i>           | -1.64 | 2.59E-07 | 5.73E-05 |
| TC0500013149.hg.1 | <i>SRD5A1</i>           | -1.64 | 0.0006   | 0.0133   |
| TC0600007650.hg.1 | <i>HLA-DRA</i>          | -1.65 | 1.12E-07 | 3.33E-05 |
| TC0100015596.hg.1 | <i>LIX1L</i>            | -1.65 | 0.0001   | 0.0037   |
| TC0800009891.hg.1 | <i>STC1</i>             | -1.66 | 1.22E-07 | 3.46E-05 |
| TC0500011648.hg.1 | <i>EFNA5</i>            | -1.66 | 2.00E-08 | 1.10E-05 |
| TC0400011600.hg.1 | <i>PITX2</i>            | -1.68 | 0.0020   | 0.0288   |
| TC1000006796.hg.1 | <i>SEC61A2</i>          | -1.69 | 7.04E-08 | 2.41E-05 |
| TC1600009162.hg.1 | <i>HCFC1R1</i>          | -1.7  | 1.86E-07 | 4.65E-05 |
| TC1200012651.hg.1 | <i>KIF5A</i>            | -1.71 | 4.79E-07 | 8.57E-05 |
| TC0X00010515.hg.1 | <i>CAPN6</i>            | -1.71 | 1.52E-05 | 0.0010   |
| TC0200016648.hg.1 | <i>CDC42EP3</i>         | -1.71 | 1.31E-05 | 0.0009   |
| TC0100011148.hg.1 | <i>CAMSAP2</i>          | -1.72 | 9.11E-08 | 2.87E-05 |
| TC0400011994.hg.1 | <i>INPP4B</i>           | -1.72 | 2.23E-06 | 0.0003   |
| TC0300013123.hg.1 | <i>PLD1</i>             | -1.74 | 9.81E-08 | 3.00E-05 |
| TC0600007087.hg.1 | <i>CAP2</i>             | -1.74 | 1.13E-07 | 3.33E-05 |
| TC1700012354.hg.1 | <i>VAMP2</i>            | -1.75 | 2.13E-06 | 0.0002   |
| TC1700010625.hg.1 | <i>TNS4</i>             | -1.75 | 1.30E-08 | 8.46E-06 |
| TC1900009186.hg.1 | <i>ATP8B3</i>           | -1.76 | 7.08E-08 | 2.41E-05 |
| TC0700007034.hg.1 | <i>CREB5</i>            | -1.76 | 7.06E-05 | 0.0030   |
| TC1000009414.hg.1 | <i>INPP5A</i>           | -1.77 | 2.50E-08 | 1.29E-05 |
| TC1100009068.hg.1 | <i>NCAM1</i>            | -1.77 | 6.94E-08 | 2.41E-05 |
| TC0600011957.hg.1 | <i>ADGRF1</i>           | -1.78 | 7.56E-06 | 0.0006   |
| TC1700008263.hg.1 | <i>ABCC3</i>            | -1.79 | 2.47E-08 | 1.29E-05 |
| TC0600009327.hg.1 | <i>PKIB</i>             | -1.79 | 3.07E-08 | 1.43E-05 |
| TC1700010997.hg.1 | <i>HOXB9</i>            | -1.81 | 3.26E-08 | 1.47E-05 |
| TC1400008714.hg.1 | <i>SLC22A17</i>         | -1.81 | 3.57E-05 | 0.0018   |
| TC0600011953.hg.1 | <i>PLA2G7</i>           | -1.83 | 6.16E-05 | 0.0027   |
| TC0300012048.hg.1 | <i>ZBTB20; MIR568</i>   | -1.83 | 4.71E-07 | 8.49E-05 |
| TC1000009927.hg.1 | <i>ST8SIA6</i>          | -1.84 | 9.44E-07 | 0.0001   |
| TC0200015364.hg.1 | <i>SATB2</i>            | -1.89 | 1.58E-08 | 9.15E-06 |
| TC0100011378.hg.1 | <i>RASSF5</i>           | -1.9  | 6.41E-06 | 0.0005   |
| TC0800010382.hg.1 | <i>SNAI2</i>            | -1.9  | 3.52E-05 | 0.0018   |
| TC1800009268.hg.1 | <i>DSC2</i>             | -1.91 | 2.79E-09 | 3.32E-06 |
| TC1800007360.hg.1 | <i>RAB27B</i>           | -1.91 | 1.53E-07 | 3.99E-05 |
| TC0600009439.hg.1 | <i>TMEM200A</i>         | -1.91 | 1.24E-08 | 8.32E-06 |
| TC0100009373.hg.1 | <i>SLC6A17</i>          | -1.92 | 2.79E-05 | 0.0015   |
| TC0300009855.hg.1 | <i>IL1RAP</i>           | -1.93 | 5.86E-08 | 2.17E-05 |
| TC0400008943.hg.1 | <i>EDNRA</i>            | -1.93 | 2.53E-05 | 0.0014   |
| TC0500011418.hg.1 | <i>MEF2C</i>            | -1.97 | 4.25E-08 | 1.82E-05 |
| TC0800006864.hg.1 | <i>ZDHHC2</i>           | -1.98 | 9.06E-10 | 1.56E-06 |
| TC0500007834.hg.1 | <i>F2RL1</i>            | -1.99 | 3.51E-10 | 8.36E-07 |
| TC0900010886.hg.1 | <i>PTCH1</i>            | -2.07 | 4.59E-10 | 9.84E-07 |
| TC1700012433.hg.1 | <i>HOXB6</i>            | -2.08 | 1.64E-10 | 5.02E-07 |
| TC1200010182.hg.1 | <i>BHLHE41</i>          | -2.1  | 1.06E-08 | 7.86E-06 |

|                   |                 |       |          |          |
|-------------------|-----------------|-------|----------|----------|
| TC0200008058.hg.1 | <i>C2orf78</i>  | -2.23 | 1.18E-08 | 8.16E-06 |
| TC0500007972.hg.1 | <i>VCAN</i>     | -2.26 | 1.31E-09 | 1.88E-06 |
| TC0100016476.hg.1 | <i>KIAA0040</i> | -2.71 | 9.04E-11 | 4.85E-07 |
| TC0100016218.hg.1 | <i>RGS5</i>     | -2.77 | 2.61E-10 | 7.00E-07 |
| TC0100009142.hg.1 | <i>PTBP2</i>    | -3.69 | 2.21E-13 | 4.73E-09 |

---

The fold change was calculated as (expression in control cells)/(expression in cells silenced for *ZNF518B*) and expressed as logarithm in base 2

**Supplementary Table S4.** Genes significantly altered by *EHMT2* or *EZH2* silencing in HCT116 cells as retrieved from the GEO database

a) *siEZH2*

| ENSEMBL ID      | Gene Symbol     | Bowtie2 |          |          | STAR   |          |          |
|-----------------|-----------------|---------|----------|----------|--------|----------|----------|
|                 |                 | logFC   | P-Value  | FDR      | logFC  | P-Value  | FDR      |
| ENSG00000197915 | <i>HRNR</i>     | 3.804   | 5.27E-30 | 3.42E-25 | 4.303  | 2.52E-49 | 1.64E-44 |
| ENSG00000099250 | <i>NRP1</i>     | -2.484  | 3.33E-26 | 1.08E-21 | -2.460 | 3.13E-26 | 1.02E-21 |
| ENSG00000143631 | <i>FLG</i>      | 5.345   | 8.53E-18 | 1.11E-13 | 5.949  | 3.93E-25 | 8.48E-21 |
| ENSG00000171903 | <i>CYP4F11</i>  | 2.234   | 5.29E-21 | 1.14E-16 | 2.223  | 2.50E-21 | 4.05E-17 |
| ENSG00000110492 | <i>MDK</i>      | -1.947  | 1.33E-19 | 2.16E-15 | -1.961 | 6.22E-20 | 8.07E-16 |
| ENSG00000245532 | <i>NEAT1</i>    | 1.795   | 1.81E-17 | 1.96E-13 | 1.790  | 2.20E-17 | 2.38E-13 |
| ENSG00000135074 | <i>ADAM19</i>   | -2.305  | 6.38E-16 | 5.91E-12 | -2.288 | 1.73E-16 | 1.60E-12 |
| ENSG00000137491 | <i>SLCO2B1</i>  | 3.691   | 8.46E-16 | 6.85E-12 | 3.616  | 3.34E-16 | 2.70E-12 |
| ENSG00000186529 | <i>CYP4F3</i>   | 2.233   | 3.93E-15 | 2.55E-11 | 2.231  | 4.98E-16 | 3.59E-12 |
| ENSG00000143183 | <i>TMCO1</i>    | -1.684  | 1.01E-14 | 5.95E-11 | -1.740 | 6.45E-16 | 4.18E-12 |
| ENSG00000176485 | <i>PLAAT3</i>   | -2.236  | 3.51E-15 | 2.53E-11 | -2.097 | 1.41E-14 | 8.33E-11 |
| ENSG00000198074 | <i>AKR1B10</i>  | 2.439   | 8.24E-13 | 3.82E-09 | 2.409  | 2.56E-14 | 1.28E-10 |
| ENSG00000105329 | <i>TGFB1</i>    | -1.594  | 1.67E-12 | 7.21E-09 | -1.628 | 3.91E-13 | 1.49E-09 |
| ENSG00000157570 | <i>TSPAN18</i>  | -1.791  | 3.50E-12 | 1.41E-08 | -1.845 | 4.63E-13 | 1.65E-09 |
| ENSG00000035862 | <i>TIMP2</i>    | -1.604  | 3.46E-13 | 1.87E-09 | -1.592 | 5.04E-13 | 1.65E-09 |
| ENSG00000163435 | <i>ELF3</i>     | 1.794   | 3.70E-12 | 1.41E-08 | 1.829  | 5.08E-13 | 1.65E-09 |
| ENSG00000146648 | <i>EGFR</i>     | -1.555  | 4.21E-13 | 2.10E-09 | -1.543 | 5.57E-13 | 1.72E-09 |
| ENSG00000144063 | <i>MALL</i>     | -1.395  | 9.19E-11 | 2.35E-07 | -1.493 | 1.87E-12 | 5.51E-09 |
| ENSG00000156510 | <i>HKDC1</i>    | 1.707   | 6.94E-12 | 2.20E-08 | 1.671  | 4.37E-12 | 1.20E-08 |
| ENSG00000167549 | <i>CORO6</i>    | 1.598   | 6.18E-12 | 2.20E-08 | 1.599  | 4.45E-12 | 1.20E-08 |
| ENSG00000145284 | <i>SCD5</i>     | -1.626  | 6.97E-12 | 2.20E-08 | -1.612 | 6.88E-12 | 1.79E-08 |
| ENSG00000182158 | <i>CREB3L2</i>  | -1.495  | 2.44E-11 | 7.18E-08 | -1.517 | 1.07E-11 | 2.67E-08 |
| ENSG00000006016 | <i>CRLF1</i>    | -1.588  | 9.24E-11 | 2.35E-07 | -1.612 | 2.61E-11 | 6.04E-08 |
| ENSG00000078018 | <i>MAP2</i>     | 1.516   | 7.11E-12 | 2.20E-08 | 1.458  | 3.19E-11 | 7.14E-08 |
| ENSG00000118596 | <i>SLC16A7</i>  | -1.410  | 1.50E-10 | 3.60E-07 | -1.443 | 5.30E-11 | 1.14E-07 |
| ENSG00000166147 | <i>FBN1</i>     | 2.139   | 2.52E-10 | 5.28E-07 | 2.110  | 5.71E-11 | 1.19E-07 |
| ENSG00000082146 | <i>STRADB</i>   | -1.419  | 3.79E-08 | 3.62E-05 | -1.607 | 6.43E-11 | 1.30E-07 |
| ENSG00000186480 | <i>INSIG1</i>   | 1.374   | 9.43E-11 | 2.35E-07 | 1.360  | 1.31E-10 | 2.58E-07 |
| ENSG00000140961 | <i>OSGIN1</i>   | 1.452   | 5.01E-11 | 1.41E-07 | 1.405  | 1.54E-10 | 2.94E-07 |
| ENSG00000137414 | <i>FAM8A1</i>   | -1.412  | 1.85E-10 | 4.13E-07 | -1.411 | 1.66E-10 | 3.07E-07 |
| ENSG00000142192 | <i>APP</i>      | -1.303  | 4.68E-10 | 7.98E-07 | -1.330 | 1.96E-10 | 3.53E-07 |
| ENSG00000155629 | <i>PIK3AP1</i>  | -1.723  | 2.02E-10 | 4.36E-07 | -1.646 | 3.03E-10 | 5.16E-07 |
| ENSG00000178852 | <i>EFCAB13</i>  | 1.478   | 2.68E-10 | 5.43E-07 | 1.468  | 3.31E-10 | 5.37E-07 |
| ENSG00000164484 | <i>TMEM200A</i> | -1.600  | 3.68E-10 | 6.44E-07 | -1.586 | 4.08E-10 | 6.45E-07 |
| ENSG00000076770 | <i>MBNL3</i>    | -1.361  | 3.60E-10 | 6.44E-07 | -1.354 | 4.18E-10 | 6.45E-07 |
| ENSG00000171931 | <i>FBXW10</i>   | 1.640   | 3.77E-05 | 0.00938  | 1.976  | 5.38E-10 | 8.11E-07 |
| ENSG00000117322 | <i>CR2</i>      | -1.778  | 3.68E-09 | 5.43E-06 | -1.786 | 5.53E-10 | 8.15E-07 |
| ENSG00000174498 | <i>IGDCC3</i>   | -2.703  | 4.81E-10 | 8.00E-07 | -2.507 | 9.20E-10 | 1.33E-06 |
| ENSG00000117148 | <i>ACTL8</i>    | -1.496  | 3.42E-10 | 6.34E-07 | -1.439 | 9.78E-10 | 1.35E-06 |
| ENSG00000169499 | <i>PLEKHA2</i>  | -1.468  | 6.46E-09 | 8.21E-06 | -1.509 | 1.50E-09 | 2.02E-06 |
| ENSG00000272398 | <i>CD24</i>     | -1.644  | 1.67E-07 | 0.00013  | -1.737 | 2.46E-09 | 3.24E-06 |
| ENSG00000164171 | <i>ITGA2</i>    | -1.251  | 3.30E-09 | 4.97E-06 | -1.257 | 2.50E-09 | 3.24E-06 |
| ENSG00000163297 | <i>ANTXR2</i>   | -1.314  | 8.33E-09 | 1.02E-05 | -1.343 | 2.65E-09 | 3.36E-06 |
| ENSG00000180537 | <i>RNF182</i>   | -1.477  | 1.46E-09 | 2.31E-06 | -1.441 | 3.09E-09 | 3.86E-06 |
| ENSG00000238741 | <i>SCARNA7</i>  | -1.271  | 4.65E-09 | 6.71E-06 | -1.278 | 3.70E-09 | 4.53E-06 |
| ENSG00000111145 | <i>ELK3</i>     | -1.266  | 4.78E-09 | 6.73E-06 | -1.269 | 4.36E-09 | 5.16E-06 |
| ENSG00000071967 | <i>CYBRD1</i>   | -1.313  | 5.37E-09 | 7.25E-06 | -1.313 | 5.18E-09 | 5.97E-06 |
| ENSG00000111799 | <i>COL12A1</i>  | -1.271  | 5.79E-09 | 7.66E-06 | -1.259 | 5.25E-09 | 5.97E-06 |
| ENSG00000138777 | <i>PPA2</i>     | 1.134   | 2.66E-07 | 0.00018  | 1.263  | 5.87E-09 | 6.57E-06 |

|                 |                     |        |          |          |        |          |          |
|-----------------|---------------------|--------|----------|----------|--------|----------|----------|
| ENSG00000147606 | <i>SLC26A7</i>      | 1.736  | 2.46E-09 | 3.80E-06 | 1.619  | 6.26E-09 | 6.88E-06 |
| ENSG00000179388 | <i>EGR3</i>         | -1.665 | 9.11E-09 | 1.09E-05 | -1.673 | 6.99E-09 | 7.56E-06 |
| ENSG00000224715 | <i>LOC339685</i>    | 1.638  | 2.76E-08 | 2.84E-05 | 1.682  | 8.87E-09 | 9.28E-06 |
| ENSG00000196154 | <i>S100A4</i>       | 1.367  | 8.84E-08 | 7.07E-05 | 1.444  | 9.53E-09 | 9.81E-06 |
| ENSG00000248323 | <i>LUCAT1</i>       | 1.263  | 8.37E-09 | 1.02E-05 | 1.253  | 1.00E-08 | 1.01E-05 |
| ENSG00000084234 | <i>APLP2</i>        | -1.180 | 1.57E-08 | 1.75E-05 | -1.194 | 1.02E-08 | 1.02E-05 |
| ENSG00000175793 | <i>SFN</i>          | 1.194  | 1.19E-08 | 1.41E-05 | 1.194  | 1.18E-08 | 1.16E-05 |
| ENSG00000106462 | <i>EZH2</i>         | 1.090  | 2.47E-07 | 0.00017  | 1.194  | 1.45E-08 | 1.40E-05 |
| ENSG00000145246 | <i>ATP10D</i>       | -1.332 | 1.31E-08 | 1.51E-05 | -1.314 | 1.48E-08 | 1.42E-05 |
| ENSG00000189143 | <i>CLDN4</i>        | 1.200  | 1.66E-08 | 1.77E-05 | 1.196  | 1.84E-08 | 1.73E-05 |
| ENSG00000171421 | <i>MRPL36</i>       | -1.268 | 2.12E-08 | 2.21E-05 | -1.255 | 2.25E-08 | 2.08E-05 |
| ENSG00000229261 | <i>LOC101928994</i> | 1.551  | 2.86E-08 | 2.85E-05 | 1.535  | 2.39E-08 | 2.18E-05 |
| ENSG00000074047 | <i>GLI2</i>         | -1.435 | 5.91E-09 | 7.66E-06 | -1.350 | 2.42E-08 | 2.18E-05 |
| ENSG00000047597 | <i>XK</i>           | -1.190 | 3.57E-08 | 3.46E-05 | -1.193 | 3.19E-08 | 2.79E-05 |
| ENSG00000221890 | <i>NPTXR</i>        | -1.293 | 3.30E-08 | 3.24E-05 | -1.279 | 3.74E-08 | 3.23E-05 |
| ENSG00000159640 | <i>ACE</i>          | -1.690 | 3.71E-07 | 0.00023  | -1.730 | 4.60E-08 | 3.87E-05 |
| ENSG00000254911 | <i>SCARNA9</i>      | -1.404 | 1.49E-07 | 0.00011  | -1.407 | 5.67E-08 | 4.72E-05 |
| ENSG00000115884 | <i>SDC1</i>         | -1.212 | 4.89E-08 | 4.48E-05 | -1.201 | 5.80E-08 | 4.76E-05 |
| ENSG00000184321 | <i>OR51J1</i>       | 1.325  | 7.92E-08 | 6.60E-05 | 1.331  | 6.25E-08 | 5.07E-05 |
| ENSG00000115540 | <i>MOB4</i>         | -1.239 | 2.82E-08 | 2.85E-05 | -1.205 | 6.43E-08 | 5.15E-05 |
| ENSG00000172986 | <i>GXYLT2</i>       | -1.473 | 4.23E-07 | 0.00026  | -1.533 | 6.64E-08 | 5.25E-05 |
| ENSG00000130522 | <i>JUND</i>         | 1.134  | 7.72E-08 | 6.59E-05 | 1.137  | 7.02E-08 | 5.48E-05 |
| ENSG00000160199 | <i>PKNOX1</i>       | -1.156 | 1.02E-07 | 8.07E-05 | -1.161 | 7.52E-08 | 5.81E-05 |
| ENSG00000126838 | <i>PZP</i>          | 1.869  | 7.73E-08 | 6.59E-05 | 1.846  | 8.49E-08 | 6.47E-05 |
| ENSG00000073792 | <i>IGF2BP2</i>      | -1.081 | 2.64E-07 | 0.00018  | -1.114 | 1.05E-07 | 7.88E-05 |
| ENSG00000125827 | <i>TMX4</i>         | -1.139 | 2.43E-07 | 0.00017  | -1.165 | 1.08E-07 | 7.97E-05 |
| ENSG00000053747 | <i>LAMA3</i>        | 1.286  | 6.06E-08 | 5.39E-05 | 1.224  | 1.09E-07 | 7.97E-05 |
| ENSG00000025039 | <i>RRAGD</i>        | -1.209 | 7.94E-08 | 6.60E-05 | -1.183 | 1.19E-07 | 8.59E-05 |
| ENSG00000101265 | <i>RASSF2</i>       | -1.902 | 9.16E-07 | 0.00050  | -1.990 | 1.38E-07 | 9.52E-05 |
| ENSG00000162909 | <i>CAPN2</i>        | -1.052 | 4.31E-07 | 0.00027  | -1.094 | 1.43E-07 | 9.76E-05 |
| ENSG00000156042 | <i>CFAP70</i>       | 1.226  | 3.88E-08 | 3.65E-05 | 1.162  | 1.46E-07 | 9.76E-05 |
| ENSG00000156966 | <i>B3GNT7</i>       | -1.939 | 2.04E-07 | 0.00015  | -1.915 | 1.46E-07 | 9.76E-05 |
| ENSG00000165424 | <i>ZCCHC24</i>      | -1.352 | 3.03E-07 | 0.00020  | -1.380 | 1.58E-07 | 0.000105 |
| ENSG00000104154 | <i>SLC30A4</i>      | -1.329 | 8.17E-08 | 6.71E-05 | -1.291 | 1.67E-07 | 0.000110 |
| ENSG00000110917 | <i>MLEC</i>         | -1.099 | 1.43E-07 | 0.00011  | -1.091 | 1.71E-07 | 0.000111 |
| ENSG00000114115 | <i>RBP1</i>         | -1.089 | 3.28E-07 | 0.00021  | -1.109 | 1.77E-07 | 0.000114 |
| ENSG00000173218 | <i>VANGL1</i>       | -1.133 | 1.14E-07 | 8.93E-05 | -1.110 | 1.91E-07 | 0.000121 |
| ENSG00000111319 | <i>SCNN1A</i>       | 1.226  | 7.19E-08 | 6.30E-05 | 1.163  | 2.46E-07 | 0.000155 |
| ENSG00000177542 | <i>SLC25A22</i>     | -1.089 | 5.96E-07 | 0.00036  | -1.115 | 2.74E-07 | 0.000171 |
| ENSG00000137501 | <i>SYTL2</i>        | -1.117 | 3.71E-07 | 0.00023  | -1.121 | 2.87E-07 | 0.000177 |
| ENSG00000197594 | <i>ENPP1</i>        | -1.067 | 2.28E-06 | 0.00104  | -1.143 | 2.94E-07 | 0.000180 |
| ENSG00000180758 | <i>GPR157</i>       | -1.216 | 3.24E-07 | 0.00021  | -1.211 | 3.07E-07 | 0.000186 |
| ENSG00000179750 | <i>APOBEC3B</i>     | 1.318  | 8.41E-08 | 6.82E-05 | 1.180  | 3.46E-07 | 0.000206 |
| ENSG00000148248 | <i>SURF4</i>        | -1.082 | 3.51E-07 | 0.00023  | -1.062 | 3.83E-07 | 0.000224 |
| ENSG00000099864 | <i>PALM</i>         | -1.224 | 1.83E-07 | 0.00014  | -1.172 | 3.92E-07 | 0.000227 |
| ENSG00000145244 | <i>CORIN</i>        | 1.228  | 2.00E-07 | 0.00015  | 1.169  | 4.21E-07 | 0.000241 |
| ENSG00000203760 | <i>CENPW</i>        | -1.123 | 1.07E-06 | 0.00056  | -1.148 | 4.24E-07 | 0.000241 |
| ENSG00000175556 | <i>LONRF3</i>       | -1.137 | 9.87E-07 | 0.00053  | -1.156 | 4.47E-07 | 0.000252 |
| ENSG00000235703 | <i>LINC00894</i>    | 1.117  | 5.82E-06 | 0.00216  | 1.198  | 4.59E-07 | 0.000256 |
| ENSG00000181458 | <i>TMEM45A</i>      | -1.432 | 2.20E-07 | 0.00016  | -1.363 | 5.03E-07 | 0.000279 |
| ENSG00000109171 | <i>SLAIN2</i>       | -1.038 | 1.14E-06 | 0.00059  | -1.068 | 5.24E-07 | 0.000288 |
| ENSG00000184743 | <i>ATL3</i>         | -1.089 | 3.46E-07 | 0.00022  | -1.068 | 5.30E-07 | 0.000289 |
| ENSG00000120708 | <i>TGFB1</i>        | 3.487  | 8.97E-07 | 0.00050  | 3.526  | 5.49E-07 | 0.000297 |
| ENSG00000112175 | <i>BMP5</i>         | 2.751  | 3.15E-06 | 0.00133  | 2.884  | 5.63E-07 | 0.000302 |
| ENSG00000174130 | <i>TLR6</i>         | 1.299  | 3.05E-07 | 0.00020  | 1.251  | 5.94E-07 | 0.000311 |
| ENSG00000230726 | <i>HLA-DRA</i>      | -3.507 | 0.00250  | 0.16464  | -2.058 | 6.04E-07 | 0.000311 |

|                 |                     |        |          |         |        |          |          |
|-----------------|---------------------|--------|----------|---------|--------|----------|----------|
| ENSG00000237686 | <i>LOC101929705</i> | 1.324  | 1.99E-06 | 0.00094 | 1.385  | 6.64E-07 | 0.000338 |
| ENSG00000163840 | <i>DTX3L</i>        | -1.079 | 8.46E-07 | 0.00048 | -1.086 | 6.67E-07 | 0.000338 |
| ENSG00000285280 | <i>LOC105371664</i> | 1.184  | 8.03E-07 | 0.00046 | 1.179  | 6.88E-07 | 0.000346 |
| ENSG00000139318 | <i>DUSP6</i>        | -1.067 | 9.98E-07 | 0.00053 | -1.081 | 7.01E-07 | 0.000350 |
| ENSG00000163820 | <i>FYCO1</i>        | -1.041 | 1.13E-06 | 0.00059 | -1.052 | 8.08E-07 | 0.000398 |
| ENSG00000215529 | <i>EFCAB8</i>       | 2.161  | 2.62E-06 | 0.00116 | 2.142  | 8.87E-07 | 0.000425 |
| ENSG00000163754 | <i>GYG1</i>         | -1.051 | 1.20E-06 | 0.00061 | -1.058 | 8.91E-07 | 0.000425 |
| ENSG00000152952 | <i>PLOD2</i>        | -1.031 | 1.80E-06 | 0.00086 | -1.050 | 8.92E-07 | 0.000425 |
| ENSG00000229240 | <i>LINC00710</i>    | 1.299  | 8.36E-07 | 0.00048 | 1.299  | 9.51E-07 | 0.000450 |
| ENSG00000225855 | <i>RUSC1-AS1</i>    | 1.164  | 6.31E-07 | 0.00037 | 1.140  | 1.08E-06 | 0.000508 |
| ENSG00000079215 | <i>SLC1A3</i>       | -1.083 | 8.66E-07 | 0.00048 | -1.060 | 1.25E-06 | 0.000577 |
| ENSG00000206450 | <i>HLA-B</i>        | -1.044 | 1.44E-05 | 0.00443 | -1.043 | 1.26E-06 | 0.000577 |
| ENSG00000164406 | <i>LEAP2</i>        | 1.280  | 2.65E-06 | 0.00116 | 1.311  | 1.26E-06 | 0.000577 |
| ENSG00000075420 | <i>FNDC3B</i>       | -1.024 | 1.40E-06 | 0.00069 | -1.021 | 1.33E-06 | 0.000604 |
| ENSG00000001084 | <i>GCLC</i>         | 1.011  | 1.29E-06 | 0.00065 | 1.007  | 1.35E-06 | 0.000610 |
| ENSG00000147124 | <i>ZNF41</i>        | -1.041 | 3.02E-06 | 0.00128 | -1.072 | 1.47E-06 | 0.000653 |
| ENSG00000166801 | <i>FAM111A</i>      | -1.258 | 2.65E-06 | 0.00116 | -1.276 | 1.48E-06 | 0.000653 |
| ENSG00000101955 | <i>SRPX</i>         | -1.360 | 1.46E-06 | 0.00072 | -1.273 | 1.48E-06 | 0.000653 |
| ENSG00000165704 | <i>HPRT1</i>        | -0.993 | 5.42E-06 | 0.00204 | -1.033 | 1.49E-06 | 0.000653 |
| ENSG00000183091 | <i>NEB</i>          | 1.018  | 4.79E-06 | 0.00183 | 1.054  | 1.58E-06 | 0.000689 |
| ENSG00000228163 | <i>HLA-DPA1</i>     | -3.507 | 0.00250  | 0.16464 | -1.774 | 1.61E-06 | 0.000691 |
| ENSG00000106789 | <i>CORO2A</i>       | -1.319 | 5.49E-07 | 0.00034 | -1.232 | 1.74E-06 | 0.000731 |
| ENSG00000167972 | <i>ABCA3</i>        | -1.186 | 5.38E-06 | 0.00204 | -1.208 | 1.76E-06 | 0.000736 |
| ENSG00000138756 | <i>BMP2K</i>        | -1.016 | 6.09E-06 | 0.00223 | -1.053 | 1.89E-06 | 0.000780 |
| ENSG00000160131 | <i>VMA21</i>        | -1.008 | 1.76E-06 | 0.00085 | -1.004 | 1.91E-06 | 0.000780 |
| ENSG00000242290 | <i>ZBTB20-AS5</i>   | 1.594  | 2.42E-06 | 0.00109 | 1.604  | 1.93E-06 | 0.000780 |
| ENSG00000177494 | <i>ZBED2</i>        | -1.036 | 2.01E-06 | 0.00094 | -1.037 | 1.94E-06 | 0.000780 |
| ENSG00000150961 | <i>SEC24D</i>       | -0.962 | 7.24E-06 | 0.00254 | -1.007 | 2.22E-06 | 0.000881 |
| ENSG00000168785 | <i>TSPAN5</i>       | -1.014 | 1.92E-06 | 0.00091 | -1.004 | 2.24E-06 | 0.000881 |
| ENSG00000168077 | <i>SCARA3</i>       | -0.964 | 6.55E-06 | 0.00236 | -1.008 | 2.31E-06 | 0.000901 |
| ENSG00000117394 | <i>SLC2A1</i>       | -0.970 | 3.31E-06 | 0.00139 | -0.983 | 2.38E-06 | 0.000922 |
| ENSG00000137440 | <i>FGFBP1</i>       | 1.083  | 1.38E-06 | 0.00069 | 1.057  | 2.41E-06 | 0.000922 |
| ENSG00000123989 | <i>CHPF</i>         | -0.973 | 3.55E-06 | 0.00146 | -0.989 | 2.44E-06 | 0.000922 |
| ENSG00000176399 | <i>DMRTA1</i>       | 1.467  | 3.58E-06 | 0.00146 | 1.490  | 2.46E-06 | 0.000922 |
| ENSG00000133216 | <i>EPHB2</i>        | -1.061 | 5.92E-06 | 0.00218 | -1.095 | 2.48E-06 | 0.000922 |
| ENSG0000023445  | <i>BIRC3</i>        | 1.195  | 1.19E-06 | 0.00061 | 1.145  | 2.57E-06 | 0.000936 |
| ENSG00000144410 | <i>CPO</i>          | 3.687  | 0.00141  | 0.11374 | 4.515  | 2.75E-06 | 0.000998 |
| ENSG00000164983 | <i>TMEM65</i>       | -1.061 | 2.87E-06 | 0.00123 | -1.050 | 3.23E-06 | 0.001143 |
| ENSG00000139044 | <i>B4GALNT3</i>     | -1.232 | 1.74E-06 | 0.00085 | -1.168 | 3.29E-06 | 0.001161 |
| ENSG00000137767 | <i>SQOR</i>         | -1.365 | 3.38E-06 | 0.00141 | -1.303 | 3.44E-06 | 0.001206 |
| ENSG00000106785 | <i>TRIM14</i>       | -0.984 | 3.68E-06 | 0.00149 | -0.984 | 3.47E-06 | 0.001209 |
| ENSG00000116983 | <i>HPCAL4</i>       | -1.171 | 5.74E-06 | 0.00215 | -1.192 | 3.49E-06 | 0.001209 |
| ENSG00000166762 | <i>CATSPER2</i>     | 1.042  | 1.21E-05 | 0.00392 | 1.071  | 3.55E-06 | 0.001225 |
| ENSG00000105976 | <i>MET</i>          | -0.977 | 2.82E-06 | 0.00122 | -0.965 | 3.61E-06 | 0.001236 |
| ENSG00000184602 | <i>SNN</i>          | -1.082 | 4.09E-06 | 0.00162 | -1.080 | 3.81E-06 | 0.001295 |
| ENSG00000167360 | <i>OR51Q1</i>       | 1.089  | 3.76E-06 | 0.00151 | 1.085  | 3.95E-06 | 0.001335 |
| ENSG00000131969 | <i>ABHD12B</i>      | 1.165  | 5.81E-06 | 0.00216 | 1.181  | 4.28E-06 | 0.001432 |
| ENSG00000173114 | <i>LRRN3</i>        | 1.254  | 4.37E-06 | 0.00168 | 1.251  | 4.37E-06 | 0.001452 |
| ENSG00000176438 | <i>SYNE3</i>        | -1.253 | 6.70E-06 | 0.00239 | -1.258 | 4.41E-06 | 0.001459 |
| ENSG00000161921 | <i>CXCL16</i>       | -1.053 | 4.22E-06 | 0.00166 | -1.035 | 4.51E-06 | 0.001483 |
| ENSG00000183762 | <i>KREMEN1</i>      | -0.973 | 1.85E-05 | 0.00533 | -1.032 | 4.95E-06 | 0.001612 |
| ENSG00000135318 | <i>NT5E</i>         | -1.004 | 4.32E-06 | 0.00168 | -0.990 | 5.19E-06 | 0.001673 |
| ENSG00000172901 | <i>LVRN</i>         | 1.587  | 1.09E-05 | 0.00360 | 1.573  | 5.65E-06 | 0.001813 |
| ENSG00000163644 | <i>PPM1K</i>        | -1.076 | 1.06E-05 | 0.00352 | -1.098 | 5.72E-06 | 0.001826 |
| ENSG00000066629 | <i>EML1</i>         | -1.173 | 1.77E-06 | 0.00085 | -1.071 | 5.96E-06 | 0.001894 |
| ENSG00000106799 | <i>TGFBR1</i>       | -0.964 | 6.35E-06 | 0.00230 | -0.965 | 6.02E-06 | 0.001905 |

|                 |                  |        |          |         |        |          |          |
|-----------------|------------------|--------|----------|---------|--------|----------|----------|
| ENSG00000128965 | <i>CHAC1</i>     | 1.451  | 2.26E-05 | 0.00623 | 1.493  | 6.21E-06 | 0.001955 |
| ENSG00000196754 | <i>S100A2</i>    | 1.206  | 2.60E-06 | 0.00116 | 1.136  | 6.25E-06 | 0.001956 |
| ENSG00000109472 | <i>CPE</i>       | -0.871 | 6.60E-05 | 0.01407 | -0.977 | 6.32E-06 | 0.001969 |
| ENSG00000159899 | <i>NPR2</i>      | 1.072  | 1.16E-05 | 0.00378 | 1.080  | 6.36E-06 | 0.001975 |
| ENSG00000099954 | <i>CECR2</i>     | -0.943 | 4.44E-05 | 0.01053 | -1.032 | 6.62E-06 | 0.002033 |
| ENSG00000271303 | <i>SRXN1</i>     | 1.168  | 6.60E-06 | 0.00236 | 1.166  | 6.65E-06 | 0.002033 |
| ENSG00000157851 | <i>DPYSL5</i>    | -1.049 | 7.41E-06 | 0.00258 | -1.031 | 7.44E-06 | 0.002244 |
| ENSG00000155876 | <i>RRAGA</i>     | -0.969 | 8.26E-06 | 0.00282 | -0.974 | 7.44E-06 | 0.002244 |
| ENSG00000153214 | <i>TMEM87B</i>   | -1.023 | 7.78E-06 | 0.00268 | -1.013 | 7.57E-06 | 0.002272 |
| ENSG00000178297 | <i>TMPRSS9</i>   | 1.221  | 1.29E-05 | 0.00411 | 1.248  | 7.60E-06 | 0.002272 |
| ENSG00000138821 | <i>SLC39A8</i>   | -0.958 | 8.25E-06 | 0.00282 | -0.954 | 7.88E-06 | 0.002343 |
| ENSG00000138814 | <i>PPP3CA</i>    | -0.985 | 7.00E-06 | 0.00248 | -0.969 | 8.19E-06 | 0.002424 |
| ENSG00000119125 | <i>GDA</i>       | -1.247 | 3.84E-06 | 0.00153 | -1.166 | 8.24E-06 | 0.002427 |
| ENSG00000187003 | <i>ACTL7A</i>    | 7.277  | 8.35E-06 | 0.00283 | 7.275  | 8.35E-06 | 0.002444 |
| ENSG00000168938 | <i>PPIC</i>      | -0.979 | 1.92E-05 | 0.00550 | -1.010 | 8.37E-06 | 0.002444 |
| ENSG00000171208 | <i>NETO2</i>     | -1.028 | 6.16E-06 | 0.00225 | -1.001 | 8.55E-06 | 0.002487 |
| ENSG00000149131 | <i>SERPING1</i>  | -3.131 | 1.73E-05 | 0.00511 | -2.741 | 8.72E-06 | 0.002525 |
| ENSG00000168243 | <i>GNG4</i>      | -1.048 | 0.00055  | 0.06365 | -1.145 | 9.50E-06 | 0.002737 |
| ENSG00000095209 | <i>TMEM38B</i>   | -0.976 | 1.25E-05 | 0.00403 | -0.979 | 9.62E-06 | 0.002760 |
| ENSG00000237975 | <i>FLG-AS1</i>   | 3.208  | 1.73E-05 | 0.00511 | 2.997  | 9.87E-06 | 0.002818 |
| ENSG00000272636 | <i>DOC2B</i>     | -1.119 | 2.65E-05 | 0.00697 | -1.032 | 1.02E-05 | 0.002915 |
| ENSG00000168993 | <i>CPLX1</i>     | -1.073 | 1.83E-05 | 0.00532 | -1.092 | 1.11E-05 | 0.003140 |
| ENSG00000196236 | <i>XPNPEP3</i>   | 0.908  | 1.37E-05 | 0.00428 | 0.916  | 1.13E-05 | 0.003186 |
| ENSG00000101384 | <i>JAG1</i>      | -0.934 | 2.36E-05 | 0.00645 | -0.959 | 1.14E-05 | 0.003186 |
| ENSG00000073670 | <i>ADAM11</i>    | -1.302 | 6.46E-07 | 0.00037 | -1.095 | 1.15E-05 | 0.003196 |
| ENSG00000168994 | <i>PXDC1</i>     | -1.806 | 1.43E-05 | 0.00443 | -1.765 | 1.16E-05 | 0.003196 |
| ENSG00000120306 | <i>CYSTM1</i>    | -0.878 | 0.00010  | 0.01970 | -0.979 | 1.16E-05 | 0.003196 |
| ENSG00000241769 | <i>LINC00893</i> | 2.238  | 0.00054  | 0.06297 | 2.149  | 1.20E-05 | 0.003282 |
| ENSG00000277518 | <i>MUC6</i>      | 1.892  | 0.00644  | 0.28908 | 1.741  | 1.24E-05 | 0.003377 |
| ENSG00000164309 | <i>CMYA5</i>     | 1.152  | 4.72E-06 | 0.00181 | 1.091  | 1.28E-05 | 0.003461 |
| ENSG00000214944 | <i>ARHGEF28</i>  | -1.014 | 1.84E-05 | 0.00532 | -1.010 | 1.37E-05 | 0.003678 |
| ENSG00000134590 | <i>RTL8C</i>     | -0.960 | 2.92E-05 | 0.00755 | -0.996 | 1.42E-05 | 0.003794 |
| ENSG00000151135 | <i>TMEM263</i>   | -0.924 | 1.53E-05 | 0.00460 | -0.926 | 1.42E-05 | 0.003800 |
| ENSG00000164749 | <i>HNF4G</i>     | -1.118 | 2.60E-05 | 0.00689 | -1.128 | 1.46E-05 | 0.003880 |
| ENSG00000175414 | <i>ARL10</i>     | 1.294  | 1.77E-05 | 0.00519 | 1.297  | 1.48E-05 | 0.003889 |
| ENSG00000124733 | <i>MEA1</i>      | -0.873 | 5.75E-05 | 0.01282 | -0.934 | 1.48E-05 | 0.003889 |
| ENSG00000138757 | <i>G3BP2</i>     | -0.898 | 1.51E-05 | 0.00457 | -0.898 | 1.49E-05 | 0.003889 |
| ENSG00000113328 | <i>CCNG1</i>     | -0.896 | 2.54E-05 | 0.00676 | -0.918 | 1.51E-05 | 0.003931 |
| ENSG00000066117 | <i>SMARCD1</i>   | -0.889 | 2.40E-05 | 0.00655 | -0.907 | 1.53E-05 | 0.003972 |
| ENSG00000112294 | <i>ALDH5A1</i>   | -0.956 | 3.02E-05 | 0.00771 | -0.986 | 1.55E-05 | 0.003996 |
| ENSG00000149218 | <i>ENDOD1</i>    | -0.920 | 1.68E-05 | 0.00498 | -0.919 | 1.67E-05 | 0.004302 |
| ENSG00000244617 | <i>ASPRV1</i>    | 1.878  | 3.21E-05 | 0.00809 | 1.928  | 1.68E-05 | 0.004302 |
| ENSG00000136842 | <i>TMOD1</i>     | -1.198 | 2.05E-05 | 0.00579 | -1.152 | 1.70E-05 | 0.004327 |
| ENSG00000184076 | <i>UQCR10</i>    | -0.887 | 5.19E-05 | 0.01189 | -0.935 | 1.71E-05 | 0.004327 |
| ENSG00000138175 | <i>ARL3</i>      | -0.861 | 0.00015  | 0.02497 | -0.956 | 1.71E-05 | 0.004327 |
| ENSG00000184698 | <i>OR51M1</i>    | 0.956  | 1.02E-05 | 0.00340 | 0.932  | 1.73E-05 | 0.004357 |
| ENSG00000086619 | <i>ERO1B</i>     | -1.026 | 0.00023  | 0.03313 | -1.156 | 1.75E-05 | 0.004360 |
| ENSG00000103855 | <i>CD276</i>     | -0.929 | 1.28E-05 | 0.00411 | -0.908 | 1.75E-05 | 0.004360 |
| ENSG00000140092 | <i>FBLN5</i>     | -1.923 | 4.05E-05 | 0.00985 | -1.863 | 1.77E-05 | 0.004409 |
| ENSG00000206306 | <i>HLA-DRB1</i>  | -1.857 | 0.00015  | 0.02518 | -1.315 | 1.79E-05 | 0.004414 |
| ENSG00000126231 | <i>PROZ</i>      | 1.495  | 1.16E-05 | 0.00378 | 1.453  | 1.80E-05 | 0.004430 |
| ENSG00000198695 | <i>ND6</i>       | 0.894  | 1.48E-05 | 0.00450 | 0.884  | 1.81E-05 | 0.004437 |
| ENSG00000100167 | <i>SEPTIN3</i>   | -1.007 | 0.00012  | 0.02118 | -1.107 | 1.87E-05 | 0.004563 |
| ENSG00000156587 | <i>UBE2L6</i>    | -1.170 | 1.99E-05 | 0.00567 | -1.153 | 2.02E-05 | 0.004907 |
| ENSG00000151689 | <i>INPP1</i>     | -0.989 | 2.04E-05 | 0.00579 | -0.973 | 2.04E-05 | 0.004919 |
| ENSG00000085377 | <i>PREP</i>      | -0.898 | 2.48E-05 | 0.00665 | -0.898 | 2.16E-05 | 0.005193 |



|                 |                   |        |          |         |        |          |          |
|-----------------|-------------------|--------|----------|---------|--------|----------|----------|
| ENSG00000133083 | <i>DCLK1</i>      | -1.198 | 6.99E-05 | 0.01481 | -1.253 | 2.17E-05 | 0.005198 |
| ENSG00000135002 | <i>RFK</i>        | -0.925 | 2.14E-05 | 0.00596 | -0.922 | 2.19E-05 | 0.005216 |
| ENSG00000172794 | <i>RAB37</i>      | -1.585 | 8.61E-05 | 0.01746 | -1.645 | 2.20E-05 | 0.005216 |
| ENSG00000136026 | <i>CKAP4</i>      | -0.861 | 4.29E-05 | 0.01034 | -0.892 | 2.21E-05 | 0.005232 |
| ENSG00000251562 | <i>MALAT1</i>     | 0.877  | 2.05E-05 | 0.00579 | 0.872  | 2.26E-05 | 0.005336 |
| ENSG00000165730 | <i>STOX1</i>      | -0.942 | 6.32E-05 | 0.01380 | -0.993 | 2.27E-05 | 0.005336 |
| ENSG00000156298 | <i>TSPAN7</i>     | -1.542 | 2.29E-05 | 0.00630 | -1.498 | 2.29E-05 | 0.005368 |
| ENSG00000116704 | <i>SLC35D1</i>    | -0.939 | 1.79E-05 | 0.00523 | -0.923 | 2.30E-05 | 0.005372 |
| ENSG00000158104 | <i>HPD</i>        | 1.236  | 0.00018  | 0.02799 | 1.333  | 2.37E-05 | 0.005515 |
| ENSG00000130783 | <i>CCDC62</i>     | 0.975  | 3.19E-05 | 0.00807 | 0.974  | 2.45E-05 | 0.005673 |
| ENSG00000138496 | <i>PARP9</i>      | -0.906 | 0.00012  | 0.02110 | -0.982 | 2.47E-05 | 0.005703 |
| ENSG00000124159 | <i>MATN4</i>      | -2.719 | 0.00056  | 0.06408 | -2.833 | 2.53E-05 | 0.005792 |
| ENSG00000177606 | <i>JUN</i>        | 0.891  | 2.14E-05 | 0.00596 | 0.882  | 2.55E-05 | 0.005811 |
| ENSG00000108100 | <i>CCNY</i>       | -0.854 | 5.29E-05 | 0.01203 | -0.885 | 2.59E-05 | 0.005869 |
| ENSG00000172031 | <i>EPHX4</i>      | -1.462 | 5.75E-05 | 0.01282 | -1.407 | 2.64E-05 | 0.005961 |
| ENSG00000205363 | <i>INSYN1</i>     | -1.348 | 9.62E-05 | 0.01889 | -1.427 | 2.70E-05 | 0.006083 |
| ENSG00000168685 | <i>IL7R</i>       | -1.395 | 0.00014  | 0.02408 | -1.482 | 2.90E-05 | 0.006493 |
| ENSG00000008441 | <i>NFIX</i>       | -0.907 | 2.92E-05 | 0.00755 | -0.903 | 2.90E-05 | 0.006493 |
| ENSG00000197093 | <i>GAL3ST4</i>    | 1.535  | 3.73E-05 | 0.00930 | 1.535  | 2.92E-05 | 0.006496 |
| ENSG00000181609 | <i>OR52D1</i>     | 0.925  | 2.44E-05 | 0.00663 | 0.915  | 3.03E-05 | 0.006720 |
| ENSG00000136490 | <i>LIMD2</i>      | -1.030 | 0.00011  | 0.02013 | -1.092 | 3.04E-05 | 0.006720 |
| ENSG00000187918 | <i>OR51I2</i>     | 0.899  | 2.95E-05 | 0.00755 | 0.896  | 3.08E-05 | 0.006797 |
| ENSG00000005893 | <i>LAMP2</i>      | -0.908 | 2.72E-05 | 0.00714 | -0.894 | 3.13E-05 | 0.006884 |
| ENSG00000073849 | <i>ST6GAL1</i>    | -0.878 | 0.00010  | 0.01970 | -0.935 | 3.26E-05 | 0.007138 |
| ENSG00000198648 | <i>STK39</i>      | -0.901 | 2.47E-05 | 0.00665 | -0.877 | 3.31E-05 | 0.007234 |
| ENSG00000169783 | <i>LINGO1</i>     | -0.977 | 2.85E-05 | 0.00742 | -0.969 | 3.33E-05 | 0.007234 |
| ENSG00000166401 | <i>SERPINB8</i>   | -1.008 | 4.35E-05 | 0.01040 | -1.008 | 3.34E-05 | 0.007246 |
| ENSG00000213626 | <i>LBH</i>        | -2.877 | 1.58E-05 | 0.00472 | -2.613 | 3.36E-05 | 0.007246 |
| ENSG00000188897 | <i>LOC400499</i>  | 0.873  | 7.07E-05 | 0.01488 | 0.904  | 3.36E-05 | 0.007246 |
| ENSG00000099953 | <i>MMP11</i>      | -1.058 | 0.00205  | 0.14440 | -1.126 | 3.49E-05 | 0.007444 |
| ENSG00000223757 | <i>VWA7</i>       | 2.119  | 0.00057  | 0.06545 | 1.108  | 3.53E-05 | 0.007444 |
| ENSG00000183087 | <i>GAS6</i>       | -0.854 | 0.00013  | 0.02233 | -0.917 | 3.57E-05 | 0.007484 |
| ENSG00000178809 | <i>TRIM73</i>     | 0.888  | 0.00059  | 0.06604 | 0.955  | 3.59E-05 | 0.007512 |
| ENSG00000157613 | <i>CREB3L1</i>    | -1.396 | 0.00077  | 0.07986 | -1.653 | 3.72E-05 | 0.007740 |
| ENSG00000111962 | <i>UST</i>        | -1.060 | 0.00011  | 0.02024 | -1.106 | 3.72E-05 | 0.007740 |
| ENSG00000089327 | <i>FXYS5</i>      | -0.842 | 0.00031  | 0.04052 | -0.936 | 3.75E-05 | 0.007741 |
| ENSG00000089472 | <i>HEPH</i>       | -1.527 | 1.45E-05 | 0.00443 | -1.355 | 3.75E-05 | 0.007741 |
| ENSG00000138641 | <i>HERC3</i>      | -0.997 | 2.22E-05 | 0.00615 | -0.949 | 3.77E-05 | 0.007753 |
| ENSG00000128573 | <i>FOXP2</i>      | -1.390 | 2.09E-05 | 0.00586 | -1.295 | 3.94E-05 | 0.008090 |
| ENSG00000188042 | <i>ARL4C</i>      | 1.442  | 1.44E-05 | 0.00443 | 1.355  | 3.96E-05 | 0.008090 |
| ENSG00000167359 | <i>OR51I1</i>     | 0.959  | 4.42E-05 | 0.01053 | 0.965  | 4.08E-05 | 0.008318 |
| ENSG00000144730 | <i>IL17RD</i>     | -1.051 | 7.62E-06 | 0.00264 | -0.953 | 4.14E-05 | 0.008417 |
| ENSG00000128242 | <i>GAL3ST1</i>    | -1.305 | 5.16E-05 | 0.01189 | -1.314 | 4.19E-05 | 0.008495 |
| ENSG00000233101 | <i>HOXB-AS3</i>   | 1.134  | 3.42E-05 | 0.00860 | 1.123  | 4.26E-05 | 0.008583 |
| ENSG00000152503 | <i>TRIM36</i>     | -0.831 | 0.00026  | 0.03641 | -0.924 | 4.33E-05 | 0.008674 |
| ENSG00000091490 | <i>SEL1L3</i>     | -0.875 | 4.83E-05 | 0.01127 | -0.870 | 4.37E-05 | 0.008727 |
| ENSG00000176239 | <i>OR51B6</i>     | 0.999  | 6.15E-05 | 0.01356 | 1.013  | 4.48E-05 | 0.008916 |
| ENSG00000116852 | <i>KIF21B</i>     | -0.935 | 1.00E-04 | 0.01935 | -0.964 | 4.52E-05 | 0.008964 |
| ENSG00000203499 | <i>FAM83H-AS1</i> | 0.852  | 0.00011  | 0.02100 | 0.867  | 4.60E-05 | 0.009083 |
| ENSG00000227801 | <i>COL11A2</i>    | 1.102  | 0.00267  | 0.17166 | 0.945  | 4.80E-05 | 0.009366 |
| ENSG0000023171  | <i>GRAMD1B</i>    | 0.969  | 0.00013  | 0.02209 | 1.009  | 4.85E-05 | 0.009448 |
| ENSG00000116745 | <i>RPE65</i>      | 0.903  | 4.52E-05 | 0.01069 | 0.900  | 4.93E-05 | 0.009533 |
| ENSG00000080166 | <i>DCT</i>        | -1.607 | 6.52E-05 | 0.01403 | -1.564 | 4.93E-05 | 0.009533 |
| ENSG00000179674 | <i>ARL14</i>      | 1.640  | 4.94E-05 | 0.01144 | 1.637  | 4.94E-05 | 0.009533 |
| ENSG00000071282 | <i>LMCD1</i>      | -1.041 | 0.00027  | 0.03698 | -1.123 | 5.15E-05 | 0.009889 |
| ENSG00000183696 | <i>UPP1</i>       | 0.851  | 5.18E-05 | 0.01189 | 0.847  | 5.21E-05 | 0.009962 |

|                 |                  |        |          |         |        |          |          |
|-----------------|------------------|--------|----------|---------|--------|----------|----------|
| ENSG00000113300 | <i>CNOT6</i>     | 0.837  | 7.30E-05 | 0.01526 | 0.851  | 5.28E-05 | 0.010071 |
| ENSG00000112599 | <i>GUCA1B</i>    | 1.129  | 4.09E-05 | 0.00991 | 1.091  | 5.34E-05 | 0.010146 |
| ENSG00000081803 | <i>CADPS2</i>    | -0.862 | 0.00016  | 0.02585 | -0.901 | 5.36E-05 | 0.010155 |
| ENSG00000073150 | <i>PANX2</i>     | -0.975 | 5.71E-05 | 0.01280 | -0.974 | 5.37E-05 | 0.010155 |
| ENSG00000185650 | <i>ZFP36L1</i>   | -0.834 | 5.59E-05 | 0.01264 | -0.836 | 5.44E-05 | 0.010253 |
| ENSG00000257218 | <i>GATC</i>      | 0.853  | 7.53E-05 | 0.01566 | 0.869  | 5.47E-05 | 0.010281 |
| ENSG00000273033 | <i>LINC02035</i> | -1.032 | 8.44E-05 | 0.01738 | -1.058 | 5.55E-05 | 0.010391 |
| ENSG00000154511 | <i>DIPK1A</i>    | -1.024 | 3.91E-05 | 0.00958 | -0.994 | 5.76E-05 | 0.010650 |
| ENSG00000128805 | <i>ARHGAP22</i>  | -0.989 | 0.00015  | 0.02513 | -1.033 | 5.77E-05 | 0.010650 |
| ENSG00000151881 | <i>TMEM267</i>   | -0.898 | 0.00014  | 0.02366 | -0.940 | 5.87E-05 | 0.010768 |
| ENSG00000127364 | <i>TAS2R4</i>    | 1.005  | 0.00010  | 0.01970 | 1.035  | 5.88E-05 | 0.010768 |
| ENSG00000169251 | <i>NMD3</i>      | -0.800 | 0.00014  | 0.02355 | -0.839 | 5.91E-05 | 0.010768 |
| ENSG00000179532 | <i>DNHD1</i>     | 0.883  | 3.91E-05 | 0.00958 | 0.859  | 5.91E-05 | 0.010768 |
| ENSG00000167524 | <i>RSKR</i>      | 0.888  | 0.00010  | 0.01959 | 0.914  | 6.20E-05 | 0.011171 |
| ENSG00000166311 | <i>SMPD1</i>     | -1.042 | 0.00012  | 0.02171 | -1.060 | 6.26E-05 | 0.011250 |
| ENSG00000080561 | <i>MID2</i>      | -1.104 | 0.00011  | 0.02041 | -1.105 | 6.33E-05 | 0.011342 |
| ENSG00000169213 | <i>RAB3B</i>     | -0.857 | 6.71E-05 | 0.01427 | -0.858 | 6.41E-05 | 0.011455 |
| ENSG00000198959 | <i>TGM2</i>      | -1.378 | 0.00021  | 0.03041 | -1.391 | 6.48E-05 | 0.011524 |
| ENSG00000080503 | <i>SMARCA2</i>   | -0.867 | 0.00022  | 0.03153 | -0.921 | 6.56E-05 | 0.011597 |
| ENSG00000198682 | <i>PAPSS2</i>    | -0.926 | 0.00013  | 0.02320 | -0.957 | 6.73E-05 | 0.011825 |
| ENSG00000150938 | <i>CRIM1</i>     | -0.810 | 0.00013  | 0.02306 | -0.841 | 6.73E-05 | 0.011825 |
| ENSG00000139926 | <i>FRMD6</i>     | -0.912 | 0.00016  | 0.02584 | -0.944 | 6.80E-05 | 0.011915 |
| ENSG00000258955 | <i>LINC00519</i> | 1.366  | 8.65E-05 | 0.01746 | 1.379  | 6.93E-05 | 0.012110 |
| ENSG00000137198 | <i>GMPR</i>      | -0.897 | 0.00098  | 0.09257 | -1.009 | 6.97E-05 | 0.012153 |
| ENSG00000188015 | <i>S100A3</i>    | 1.352  | 3.89E-05 | 0.00958 | 1.260  | 7.08E-05 | 0.012313 |
| ENSG00000147592 | <i>LACTB2</i>    | -0.861 | 0.00011  | 0.02013 | -0.874 | 7.19E-05 | 0.012427 |
| ENSG00000138759 | <i>FRAS1</i>     | -0.831 | 8.64E-05 | 0.01746 | -0.836 | 7.23E-05 | 0.012441 |
| ENSG00000186115 | <i>CYP4F2</i>    | 2.332  | 0.00076  | 0.07937 | 2.024  | 7.28E-05 | 0.012495 |
| ENSG00000206435 | <i>HLA-C</i>     | -0.882 | 0.00015  | 0.02480 | -0.844 | 7.37E-05 | 0.012573 |
| ENSG00000151348 | <i>EXT2</i>      | -0.830 | 8.47E-05 | 0.01738 | -0.833 | 7.50E-05 | 0.012694 |
| ENSG00000166710 | <i>B2M</i>       | -0.861 | 4.82E-05 | 0.01127 | -0.825 | 7.67E-05 | 0.012921 |
| ENSG00000135048 | <i>CEMIP2</i>    | -0.867 | 0.00013  | 0.02277 | -0.885 | 7.70E-05 | 0.012934 |
| ENSG00000005249 | <i>PRKAR2B</i>   | -0.915 | 0.00011  | 0.02100 | -0.884 | 7.82E-05 | 0.013105 |
| ENSG00000104267 | <i>CA2</i>       | -0.826 | 0.00013  | 0.02277 | -0.844 | 7.88E-05 | 0.013163 |
| ENSG00000135108 | <i>FBXO21</i>    | -0.807 | 0.00014  | 0.02376 | -0.834 | 7.90E-05 | 0.013163 |
| ENSG00000155016 | <i>CYP2U1</i>    | -0.946 | 8.76E-05 | 0.01759 | -0.949 | 8.11E-05 | 0.013382 |
| ENSG00000279078 | <i>SND1-IT1</i>  | 1.052  | 8.59E-05 | 0.01746 | 1.063  | 8.19E-05 | 0.013469 |
| ENSG00000184923 | <i>NUTM2A</i>    | 1.039  | 7.21E-05 | 0.01513 | 0.882  | 8.34E-05 | 0.013691 |
| ENSG00000165076 | <i>PRSS37</i>    | 2.192  | 0.00012  | 0.02207 | 2.228  | 8.39E-05 | 0.013737 |
| ENSG00000013619 | <i>MAMLD1</i>    | -0.931 | 0.00034  | 0.04411 | -1.012 | 8.51E-05 | 0.013891 |
| ENSG00000141424 | <i>SLC39A6</i>   | -0.820 | 7.86E-05 | 0.01628 | -0.815 | 8.56E-05 | 0.013891 |
| ENSG00000282164 | <i>PEG13</i>     | 1.254  | 0.00015  | 0.02525 | 1.294  | 8.59E-05 | 0.013891 |
| ENSG00000140941 | <i>MAP1LC3B</i>  | -0.858 | 4.94E-05 | 0.01144 | -0.826 | 8.63E-05 | 0.013891 |
| ENSG00000124116 | <i>WFDC3</i>     | 1.808  | 0.00011  | 0.02100 | 1.723  | 8.63E-05 | 0.013891 |
| ENSG00000049249 | <i>TNFRSF9</i>   | 1.384  | 9.09E-05 | 0.01814 | 1.363  | 8.65E-05 | 0.013891 |
| ENSG00000102531 | <i>FNDC3A</i>    | -0.790 | 0.00022  | 0.03153 | -0.833 | 8.66E-05 | 0.013891 |
| ENSG00000185674 | <i>LYG2</i>      | 1.594  | 0.00015  | 0.02513 | 1.639  | 8.66E-05 | 0.013891 |
| ENSG00000115353 | <i>TACR1</i>     | 1.695  | 8.68E-05 | 0.01747 | 1.692  | 8.68E-05 | 0.013891 |
| ENSG00000151364 | <i>KCTD14</i>    | -1.107 | 0.00012  | 0.02111 | -1.128 | 8.82E-05 | 0.014092 |
| ENSG00000158286 | <i>RNF207</i>    | 0.857  | 7.05E-05 | 0.01488 | 0.841  | 9.06E-05 | 0.014433 |
| ENSG00000102580 | <i>DNAJC3</i>    | -0.796 | 0.00015  | 0.02437 | -0.818 | 9.29E-05 | 0.014770 |
| ENSG00000157227 | <i>MMP14</i>     | 1.038  | 9.27E-05 | 0.01837 | 1.017  | 9.54E-05 | 0.015130 |
| ENSG00000169914 | <i>OTUD3</i>     | 0.819  | 0.00012  | 0.02171 | 0.829  | 9.57E-05 | 0.015130 |
| ENSG00000135404 | <i>CD63</i>      | -0.797 | 0.00017  | 0.02740 | -0.822 | 9.62E-05 | 0.015178 |
| ENSG00000151729 | <i>SLC25A4</i>   | -0.847 | 0.00013  | 0.02209 | -0.853 | 9.68E-05 | 0.015236 |
| ENSG00000152413 | <i>HOMER1</i>    | -0.829 | 0.00010  | 0.01970 | -0.826 | 0.00010  | 0.015935 |

|                 |                     |        |          |         |        |         |          |
|-----------------|---------------------|--------|----------|---------|--------|---------|----------|
| ENSG00000143162 | <i>CREG1</i>        | -0.809 | 0.00019  | 0.02853 | -0.837 | 0.00010 | 0.015980 |
| ENSG00000188511 | <i>C22orf34</i>     | 0.888  | 0.00022  | 0.03164 | 0.925  | 0.00010 | 0.016082 |
| ENSG00000135363 | <i>LMO2</i>         | -2.568 | 0.00026  | 0.03641 | -2.682 | 0.00010 | 0.016109 |
| ENSG00000166016 | <i>ABTB2</i>        | 0.867  | 0.00011  | 0.02005 | 0.859  | 0.00011 | 0.016347 |
| ENSG00000085063 | <i>CD59</i>         | -0.852 | 8.50E-05 | 0.01738 | -0.838 | 0.00011 | 0.016452 |
| ENSG00000153071 | <i>DAB2</i>         | -0.938 | 0.00014  | 0.02366 | -0.944 | 0.00011 | 0.016484 |
| ENSG00000149050 | <i>ZNF214</i>       | 1.836  | 0.00031  | 0.04005 | 1.932  | 0.00011 | 0.016678 |
| ENSG00000214562 | <i>NUTM2D</i>       | 0.679  | 0.00814  | 0.32767 | 0.861  | 0.00011 | 0.016696 |
| ENSG00000108813 | <i>DLX4</i>         | 1.163  | 6.43E-05 | 0.01399 | 1.107  | 0.00011 | 0.016744 |
| ENSG00000246922 | <i>UBAP1L</i>       | 0.858  | 0.00011  | 0.02045 | 0.857  | 0.00011 | 0.016744 |
| ENSG00000187164 | <i>SHTN1</i>        | 0.799  | 0.00013  | 0.02210 | 0.804  | 0.00011 | 0.016753 |
| ENSG00000197635 | <i>DPP4</i>         | -1.128 | 0.00111  | 0.10055 | -1.220 | 0.00011 | 0.016753 |
| ENSG00000163053 | <i>SLC16A14</i>     | -0.838 | 0.00025  | 0.03560 | -0.879 | 0.00011 | 0.017161 |
| ENSG00000254206 | <i>NPIPB11</i>      | 0.646  | 0.00571  | 0.26897 | 0.821  | 0.00011 | 0.017231 |
| ENSG00000142449 | <i>FBN3</i>         | -1.107 | 0.00079  | 0.08089 | -1.192 | 0.00012 | 0.017262 |
| ENSG00000135905 | <i>DOCK10</i>       | 1.709  | 0.00022  | 0.03164 | 1.729  | 0.00012 | 0.017479 |
| ENSG00000120742 | <i>SERP1</i>        | -0.818 | 9.09E-05 | 0.01814 | -0.804 | 0.00012 | 0.017596 |
| ENSG00000065320 | <i>NTN1</i>         | -1.033 | 6.47E-05 | 0.01400 | -0.991 | 0.00012 | 0.017917 |
| ENSG00000154310 | <i>TNIK</i>         | -0.803 | 0.00027  | 0.03680 | -0.834 | 0.00012 | 0.018127 |
| ENSG00000163162 | <i>RNF149</i>       | -0.770 | 0.00029  | 0.03924 | -0.815 | 0.00012 | 0.018127 |
| ENSG00000060762 | <i>MPC1</i>         | -0.943 | 0.00012  | 0.02202 | -0.922 | 0.00012 | 0.018367 |
| ENSG00000188199 | <i>NUTM2B</i>       | 0.844  | 0.00130  | 0.10868 | 0.859  | 0.00013 | 0.018763 |
| ENSG00000185269 | <i>NOTUM</i>        | -0.889 | 0.00120  | 0.10514 | -1.020 | 0.00013 | 0.018880 |
| ENSG00000123892 | <i>RAB38</i>        | -1.106 | 0.00015  | 0.02505 | -1.100 | 0.00013 | 0.018894 |
| ENSG00000069869 | <i>NEDD4</i>        | -0.865 | 0.00010  | 0.01970 | -0.839 | 0.00013 | 0.018894 |
| ENSG00000166436 | <i>TRIM66</i>       | 0.839  | 9.95E-05 | 0.01931 | 0.820  | 0.00013 | 0.019593 |
| ENSG00000003989 | <i>SLC7A2</i>       | -0.801 | 0.00016  | 0.02623 | -0.809 | 0.00014 | 0.020020 |
| ENSG00000110092 | <i>CCND1</i>        | 0.790  | 0.00013  | 0.02229 | 0.786  | 0.00014 | 0.020043 |
| ENSG00000143061 | <i>IGSF3</i>        | -0.817 | 0.00016  | 0.02564 | -0.815 | 0.00014 | 0.020173 |
| ENSG00000144369 | <i>FAM171B</i>      | -0.868 | 9.24E-05 | 0.01837 | -0.839 | 0.00014 | 0.020409 |
| ENSG00000025772 | <i>TOMM34</i>       | -0.767 | 0.00030  | 0.03945 | -0.803 | 0.00014 | 0.020414 |
| ENSG00000259207 | <i>ITGB3</i>        | 2.026  | 0.00014  | 0.02408 | 2.022  | 0.00014 | 0.020414 |
| ENSG00000160678 | <i>S100A1</i>       | 1.421  | 7.54E-05 | 0.01566 | 1.390  | 0.00014 | 0.020434 |
| ENSG00000137962 | <i>ARHGAP29</i>     | -0.770 | 0.00019  | 0.02878 | -0.783 | 0.00015 | 0.021042 |
| ENSG00000104361 | <i>NIPAL2</i>       | -0.968 | 6.54E-05 | 0.01403 | -0.906 | 0.00015 | 0.021042 |
| ENSG00000266412 | <i>NCOA4</i>        | -0.778 | 0.00019  | 0.02873 | -0.789 | 0.00015 | 0.021159 |
| ENSG00000277254 | <i>TAS2R13</i>      | 2.816  | 8.72E-06 | 0.00295 | 1.411  | 0.00015 | 0.021159 |
| ENSG00000231683 | <i>LOC101927136</i> | 1.358  | 0.00031  | 0.04005 | 1.411  | 0.00015 | 0.021159 |
| ENSG00000182796 | <i>TMEM198B</i>     | 1.074  | 0.00018  | 0.02750 | 1.079  | 0.00015 | 0.021324 |
| ENSG00000162745 | <i>OLFML2B</i>      | -1.681 | 0.00016  | 0.02574 | -1.592 | 0.00016 | 0.021431 |
| ENSG00000112874 | <i>NUDT12</i>       | -0.828 | 0.00028  | 0.03757 | -0.849 | 0.00016 | 0.021558 |
| ENSG00000179818 | <i>PCBP1-AS1</i>    | 0.876  | 5.61E-05 | 0.01264 | 0.816  | 0.00016 | 0.021558 |
| ENSG00000107738 | <i>VSIR</i>         | -0.938 | 0.00026  | 0.03641 | -0.958 | 0.00016 | 0.021558 |
| ENSG00000139344 | <i>AMDHD1</i>       | -0.907 | 0.00236  | 0.15843 | -1.080 | 0.00016 | 0.021558 |
| ENSG00000069535 | <i>MAOB</i>         | -1.916 | 0.00010  | 0.01970 | -1.684 | 0.00016 | 0.021558 |
| ENSG00000162849 | <i>KIF26B</i>       | -1.777 | 0.00128  | 0.10751 | -1.721 | 0.00016 | 0.021558 |
| ENSG00000116005 | <i>PCYOX1</i>       | -0.785 | 0.00019  | 0.02853 | -0.790 | 0.00017 | 0.022494 |
| ENSG00000062038 | <i>CDH3</i>         | -0.779 | 0.00024  | 0.03434 | -0.796 | 0.00017 | 0.022494 |
| ENSG00000241322 | <i>CDRT1</i>        | 1.586  | 0.00054  | 0.06333 | 1.447  | 0.00017 | 0.022494 |
| ENSG00000225614 | <i>ZNF469</i>       | -0.811 | 0.00018  | 0.02762 | -0.812 | 0.00017 | 0.022814 |
| ENSG00000144959 | <i>NCEH1</i>        | -0.826 | 0.00017  | 0.02720 | -0.824 | 0.00017 | 0.022814 |
| ENSG00000179163 | <i>FUCA1</i>        | -0.876 | 0.00023  | 0.03252 | -0.881 | 0.00017 | 0.022866 |
| ENSG00000139117 | <i>CPNE8</i>        | -0.828 | 0.00030  | 0.04005 | -0.832 | 0.00018 | 0.023303 |
| ENSG00000001036 | <i>FUCA2</i>        | -0.782 | 0.00022  | 0.03153 | -0.788 | 0.00019 | 0.024566 |
| ENSG00000143520 | <i>FLG2</i>         | 6.734  | 0.00035  | 0.04482 | 6.838  | 0.00019 | 0.024593 |
| ENSG00000181104 | <i>F2R</i>          | -0.826 | 0.00031  | 0.04050 | -0.851 | 0.00019 | 0.024711 |

|                 |                  |        |          |         |        |         |          |
|-----------------|------------------|--------|----------|---------|--------|---------|----------|
| ENSG00000125534 | <i>PPDPF</i>     | -0.751 | 0.00039  | 0.04893 | -0.787 | 0.00019 | 0.025138 |
| ENSG00000108924 | <i>HLF</i>       | -0.901 | 9.49E-05 | 0.01876 | -0.857 | 0.00019 | 0.025306 |
| ENSG00000168646 | <i>AXIN2</i>     | -0.810 | 0.00035  | 0.04482 | -0.843 | 0.00020 | 0.025538 |
| ENSG00000051128 | <i>HOMER3</i>    | -0.875 | 0.00017  | 0.02638 | -0.857 | 0.00020 | 0.025712 |
| ENSG00000133121 | <i>STARD13</i>   | -0.966 | 0.00025  | 0.03529 | -0.975 | 0.00020 | 0.025712 |
| ENSG00000112276 | <i>BVES</i>      | -1.157 | 0.00026  | 0.03636 | -1.149 | 0.00020 | 0.025712 |
| ENSG00000198786 | <i>ND5</i>       | 0.769  | 0.00018  | 0.02807 | 0.764  | 0.00020 | 0.025846 |
| ENSG00000101911 | <i>PRPS2</i>     | -0.786 | 0.00020  | 0.02988 | -0.784 | 0.00020 | 0.025874 |
| ENSG00000186063 | <i>AIDA</i>      | -0.773 | 0.00039  | 0.04893 | -0.788 | 0.00020 | 0.025986 |
| ENSG00000074181 | <i>NOTCH3</i>    | -0.943 | 0.00026  | 0.03641 | -0.935 | 0.00020 | 0.026033 |
| ENSG00000010626 | <i>LRRC23</i>    | 0.971  | 0.00012  | 0.02125 | 0.917  | 0.00021 | 0.026413 |
| ENSG00000166313 | <i>APBB1</i>     | -0.843 | 0.00068  | 0.07294 | -0.893 | 0.00021 | 0.026628 |
| ENSG00000134569 | <i>LRP4</i>      | -0.870 | 0.00024  | 0.03421 | -0.864 | 0.00021 | 0.026628 |
| ENSG00000188643 | <i>S100A16</i>   | -0.795 | 0.00025  | 0.03536 | -0.800 | 0.00021 | 0.026628 |
| ENSG00000048540 | <i>LMO3</i>      | 1.177  | 0.00015  | 0.02497 | 1.162  | 0.00021 | 0.026823 |
| ENSG00000234155 | <i>LINC02535</i> | -1.983 | 9.87E-05 | 0.01921 | -1.850 | 0.00021 | 0.026834 |
| ENSG00000008735 | <i>MAPK8IP2</i>  | -0.788 | 0.00055  | 0.06408 | -0.836 | 0.00022 | 0.027067 |
| ENSG00000092068 | <i>SLC7A8</i>    | -0.991 | 0.00018  | 0.02779 | -0.952 | 0.00022 | 0.027067 |
| ENSG00000169131 | <i>ZNF354A</i>   | -0.860 | 0.00024  | 0.03402 | -0.856 | 0.00022 | 0.027321 |
| ENSG00000114841 | <i>DNAH1</i>     | 0.840  | 0.00028  | 0.03818 | 0.838  | 0.00022 | 0.027372 |
| ENSG00000112561 | <i>TFEB</i>      | -1.099 | 0.00036  | 0.04529 | -1.096 | 0.00022 | 0.027967 |
| ENSG00000076716 | <i>GPC4</i>      | -0.874 | 9.60E-05 | 0.01889 | -0.818 | 0.00023 | 0.028206 |
| ENSG00000155660 | <i>PDIA4</i>     | -0.773 | 0.00019  | 0.02853 | -0.761 | 0.00023 | 0.028428 |
| ENSG00000128872 | <i>TMOD2</i>     | -0.856 | 0.00019  | 0.02895 | -0.838 | 0.00023 | 0.028459 |
| ENSG00000249476 | <i>LOC285638</i> | 1.162  | 0.00012  | 0.02143 | 1.101  | 0.00023 | 0.028790 |
| ENSG00000197763 | <i>TXNRD3</i>    | -0.908 | 0.00029  | 0.03945 | -0.892 | 0.00024 | 0.029049 |
| ENSG00000070540 | <i>WIP1</i>      | -0.938 | 0.00063  | 0.06939 | -0.969 | 0.00024 | 0.029119 |
| ENSG00000262156 | <i>APOBEC3A</i>  | 1.491  | 0.00134  | 0.11060 | 1.267  | 0.00024 | 0.029229 |
| ENSG00000007402 | <i>CACNA2D2</i>  | -0.903 | 0.00049  | 0.05886 | -0.921 | 0.00024 | 0.029426 |
| ENSG00000185686 | <i>PRAME</i>     | -0.695 | 0.00155  | 0.12143 | -0.777 | 0.00025 | 0.030147 |
| ENSG00000162738 | <i>VANGL2</i>    | 1.228  | 0.00017  | 0.02668 | 1.172  | 0.00025 | 0.030167 |
| ENSG00000113108 | <i>APBB3</i>     | 0.869  | 0.00021  | 0.03054 | 0.851  | 0.00025 | 0.030451 |
| ENSG00000137944 | <i>KYAT3</i>     | -0.836 | 0.00039  | 0.04859 | -0.844 | 0.00026 | 0.030888 |
| ENSG00000068394 | <i>GPKOW</i>     | 0.848  | 0.00018  | 0.02799 | 0.811  | 0.00027 | 0.032157 |
| ENSG00000130829 | <i>DUSP9</i>     | -0.820 | 0.00019  | 0.02878 | -0.798 | 0.00027 | 0.032157 |
| ENSG00000138685 | <i>FGF2</i>      | -0.826 | 0.00028  | 0.03830 | -0.828 | 0.00027 | 0.032885 |
| ENSG00000162378 | <i>ZYG11B</i>    | -0.764 | 0.00032  | 0.04170 | -0.770 | 0.00028 | 0.033026 |
| ENSG00000092871 | <i>RFFL</i>      | 0.744  | 0.00063  | 0.06939 | 0.789  | 0.00028 | 0.033141 |
| ENSG00000143036 | <i>SLC44A3</i>   | -0.830 | 0.00077  | 0.07986 | -0.869 | 0.00028 | 0.033141 |
| ENSG00000072062 | <i>PRKACA</i>    | 0.774  | 0.00028  | 0.03818 | 0.771  | 0.00028 | 0.033141 |
| ENSG00000079308 | <i>TNS1</i>      | -0.867 | 0.00023  | 0.03313 | -0.847 | 0.00028 | 0.033141 |
| ENSG00000175745 | <i>NR2F1</i>     | -0.878 | 0.00029  | 0.03942 | -0.882 | 0.00028 | 0.033488 |
| ENSG00000184903 | <i>IMMP2L</i>    | 0.803  | 0.00061  | 0.06738 | 0.842  | 0.00028 | 0.033552 |
| ENSG00000240288 | <i>GHRLOS</i>    | 1.097  | 0.00017  | 0.02740 | 1.054  | 0.00028 | 0.033552 |
| ENSG00000126709 | <i>IFI6</i>      | -1.062 | 0.00126  | 0.10751 | -1.141 | 0.00028 | 0.033552 |
| ENSG00000121073 | <i>SLC35B1</i>   | -0.733 | 0.00060  | 0.06643 | -0.770 | 0.00029 | 0.033634 |
| ENSG00000064652 | <i>SNX24</i>     | -0.947 | 0.00013  | 0.02247 | -0.880 | 0.00029 | 0.033727 |
| ENSG00000106066 | <i>CPVL</i>      | -0.836 | 0.00021  | 0.03085 | -0.802 | 0.00029 | 0.034269 |
| ENSG00000092096 | <i>SLC22A17</i>  | -0.911 | 0.00097  | 0.09241 | -0.978 | 0.00029 | 0.034269 |
| ENSG00000145692 | <i>BHMT</i>      | 1.777  | 0.00016  | 0.02568 | 1.643  | 0.00029 | 0.034269 |
| ENSG00000143845 | <i>ETNK2</i>     | -0.830 | 0.00082  | 0.08255 | -0.882 | 0.00030 | 0.034515 |
| ENSG00000075213 | <i>SEMA3A</i>    | -1.627 | 0.00255  | 0.16658 | -1.713 | 0.00031 | 0.035151 |
| ENSG00000170175 | <i>CHRNB1</i>    | -1.114 | 0.00017  | 0.02734 | -0.900 | 0.00031 | 0.035157 |
| ENSG00000249242 | <i>TMEM150C</i>  | -1.245 | 0.00058  | 0.06560 | -1.300 | 0.00031 | 0.035157 |
| ENSG00000132964 | <i>CDK8</i>      | -0.780 | 0.00035  | 0.04482 | -0.780 | 0.00031 | 0.035317 |
| ENSG00000151150 | <i>ANK3</i>      | 0.945  | 0.00018  | 0.02807 | 0.877  | 0.00031 | 0.035317 |

|                 |                  |        |          |         |        |         |          |
|-----------------|------------------|--------|----------|---------|--------|---------|----------|
| ENSG00000181481 | <i>RNF135</i>    | -0.919 | 0.00030  | 0.03956 | -0.906 | 0.00031 | 0.035486 |
| ENSG00000150676 | <i>CCDC83</i>    | 2.756  | 0.00010  | 0.01970 | 2.440  | 0.00031 | 0.035522 |
| ENSG00000101210 | <i>EEF1A2</i>    | -0.741 | 0.00034  | 0.04411 | -0.745 | 0.00031 | 0.035522 |
| ENSG00000170385 | <i>SLC30A1</i>   | -0.751 | 0.00038  | 0.04812 | -0.760 | 0.00032 | 0.036346 |
| ENSG00000002586 | <i>CD99</i>      | -0.678 | 0.01110  | 0.38627 | -0.819 | 0.00032 | 0.036464 |
| ENSG00000133739 | <i>LRRCC1</i>    | -0.775 | 0.00036  | 0.04542 | -0.774 | 0.00032 | 0.036482 |
| ENSG00000116667 | <i>C1orf21</i>   | -0.830 | 0.00270  | 0.17191 | -0.963 | 0.00032 | 0.036482 |
| ENSG00000129993 | <i>CBFA2T3</i>   | -0.845 | 0.00034  | 0.04411 | -0.838 | 0.00033 | 0.036763 |
| ENSG00000145349 | <i>CAMK2D</i>    | -0.831 | 0.00021  | 0.03040 | -0.793 | 0.00033 | 0.037059 |
| ENSG00000100644 | <i>HIF1A</i>     | -0.711 | 0.00065  | 0.07123 | -0.748 | 0.00034 | 0.037350 |
| ENSG00000107263 | <i>RAPGEF1</i>   | -0.745 | 0.00042  | 0.05210 | -0.754 | 0.00034 | 0.037350 |
| ENSG00000169116 | <i>PARM1</i>     | -0.837 | 0.00048  | 0.05814 | -0.860 | 0.00034 | 0.037539 |
| ENSG00000171388 | <i>APLN</i>      | -2.785 | 0.00034  | 0.04403 | -2.788 | 0.00034 | 0.037698 |
| ENSG00000158683 | <i>PKD1L1</i>    | 0.769  | 0.00180  | 0.13422 | 0.865  | 0.00034 | 0.037870 |
| ENSG00000244165 | <i>P2RY11</i>    | 0.872  | 0.00030  | 0.03945 | 0.857  | 0.00034 | 0.037981 |
| ENSG00000018236 | <i>CNTN1</i>     | -0.988 | 0.00257  | 0.16734 | -1.109 | 0.00035 | 0.038303 |
| ENSG00000005059 | <i>MCUB</i>      | -0.739 | 0.00121  | 0.10581 | -0.805 | 0.00035 | 0.038615 |
| ENSG00000170396 | <i>ZNF804A</i>   | -6.456 | 0.00127  | 0.10751 | -6.696 | 0.00035 | 0.038615 |
| ENSG00000197142 | <i>ACSL5</i>     | -0.844 | 0.00194  | 0.13898 | -0.957 | 0.00035 | 0.038720 |
| ENSG00000198910 | <i>L1CAM</i>     | -0.768 | 0.00076  | 0.07937 | -0.798 | 0.00036 | 0.038796 |
| ENSG00000033867 | <i>SLC4A7</i>    | -0.716 | 0.00070  | 0.07449 | -0.751 | 0.00036 | 0.039186 |
| ENSG00000127528 | <i>KLF2</i>      | -0.803 | 0.00045  | 0.05455 | -0.809 | 0.00036 | 0.039225 |
| ENSG00000064300 | <i>NGFR</i>      | -0.921 | 0.00019  | 0.02853 | -0.872 | 0.00036 | 0.039225 |
| ENSG00000185015 | <i>CA13</i>      | -0.779 | 0.00046  | 0.05566 | -0.788 | 0.00037 | 0.039743 |
| ENSG00000172936 | <i>MYD88</i>     | -0.795 | 0.00043  | 0.05308 | -0.802 | 0.00037 | 0.039743 |
| ENSG00000167191 | <i>GPRC5B</i>    | -0.850 | 0.00043  | 0.05271 | -0.855 | 0.00037 | 0.040095 |
| ENSG00000180539 | <i>C9orf139</i>  | 1.768  | 0.00012  | 0.02110 | 1.560  | 0.00038 | 0.040537 |
| ENSG00000109063 | <i>MYH3</i>      | 0.802  | 0.00090  | 0.08750 | 0.839  | 0.00038 | 0.040689 |
| ENSG00000196505 | <i>GDAP2</i>     | -0.768 | 0.00033  | 0.04285 | -0.757 | 0.00038 | 0.041019 |
| ENSG00000108511 | <i>HOXB6</i>     | 0.860  | 0.00063  | 0.06928 | 0.887  | 0.00038 | 0.041019 |
| ENSG00000162434 | <i>JAK1</i>      | -0.746 | 0.00037  | 0.04712 | -0.740 | 0.00040 | 0.042240 |
| ENSG00000100605 | <i>ITPK1</i>     | -0.889 | 0.00016  | 0.02626 | -0.774 | 0.00040 | 0.042437 |
| ENSG00000116711 | <i>PLA2G4A</i>   | -0.938 | 0.00027  | 0.03713 | -0.875 | 0.00041 | 0.042671 |
| ENSG00000105246 | <i>EBI3</i>      | -3.973 | 0.00014  | 0.02408 | -3.135 | 0.00041 | 0.043375 |
| ENSG00000176490 | <i>DIRAS1</i>    | -0.785 | 0.00043  | 0.05271 | -0.787 | 0.00042 | 0.043422 |
| ENSG00000110422 | <i>HIPK3</i>     | -0.752 | 0.00035  | 0.04453 | -0.740 | 0.00042 | 0.043422 |
| ENSG00000131480 | <i>AOC2</i>      | 0.756  | 0.00090  | 0.08750 | 0.799  | 0.00042 | 0.043422 |
| ENSG00000130066 | <i>SAT1</i>      | 0.780  | 0.00019  | 0.02853 | 0.735  | 0.00042 | 0.043422 |
| ENSG00000148680 | <i>HTR7</i>      | 0.895  | 0.00015  | 0.02525 | 0.819  | 0.00043 | 0.044201 |
| ENSG00000146386 | <i>ABRACL</i>    | -0.817 | 0.00040  | 0.04931 | -0.801 | 0.00043 | 0.044201 |
| ENSG00000154127 | <i>UBASH3B</i>   | -0.772 | 0.00066  | 0.07169 | -0.792 | 0.00044 | 0.044984 |
| ENSG00000175395 | <i>ZNF25</i>     | -0.998 | 0.00025  | 0.03562 | -0.949 | 0.00044 | 0.045489 |
| ENSG00000106013 | <i>ANKRD7</i>    | 6.734  | 0.00035  | 0.04482 | 3.875  | 0.00045 | 0.045958 |
| ENSG00000110042 | <i>DTX4</i>      | -3.804 | 0.00045  | 0.05449 | -3.807 | 0.00045 | 0.045958 |
| ENSG00000236024 | <i>PRRX2-AS1</i> | -3.804 | 0.00045  | 0.05449 | -3.807 | 0.00045 | 0.045958 |
| ENSG00000167508 | <i>MVD</i>       | 0.771  | 0.00024  | 0.03421 | 0.734  | 0.00045 | 0.045985 |
| ENSG00000140280 | <i>LYSMD2</i>    | -0.888 | 0.00055  | 0.06382 | -0.899 | 0.00045 | 0.046025 |
| ENSG00000163817 | <i>SLC6A20</i>   | 1.178  | 0.00250  | 0.16464 | 1.307  | 0.00046 | 0.046940 |
| ENSG00000188910 | <i>GJB3</i>      | 0.781  | 0.00050  | 0.05977 | 0.786  | 0.00046 | 0.046997 |
| ENSG00000131730 | <i>CKMT2</i>     | 0.928  | 0.00039  | 0.04920 | 0.913  | 0.00046 | 0.047066 |
| ENSG00000058668 | <i>ATP2B4</i>    | 0.742  | 0.00057  | 0.06479 | 0.749  | 0.00047 | 0.047204 |
| ENSG00000171552 | <i>BCL2L1</i>    | -0.735 | 0.00054  | 0.06277 | -0.743 | 0.00047 | 0.047334 |
| ENSG00000185947 | <i>ZNF267</i>    | -0.744 | 0.00056  | 0.06475 | -0.754 | 0.00047 | 0.047685 |
| ENSG00000104213 | <i>PDGFRL</i>    | -1.253 | 6.21E-05 | 0.01366 | -1.047 | 0.00048 | 0.048325 |
| ENSG00000150594 | <i>ADRA2A</i>    | 2.332  | 0.00076  | 0.07937 | 2.385  | 0.00049 | 0.049065 |
| ENSG00000115112 | <i>TFCP2L1</i>   | -0.753 | 0.00051  | 0.06028 | -0.751 | 0.00049 | 0.049530 |

|                 |                  |        |          |         |        |         |          |
|-----------------|------------------|--------|----------|---------|--------|---------|----------|
| ENSG00000138639 | <i>ARHGAP24</i>  | -1.343 | 0.00028  | 0.03818 | -1.227 | 0.00050 | 0.049624 |
| ENSG00000128228 | <i>SDF2L1</i>    | -0.752 | 0.00064  | 0.06974 | -0.761 | 0.00050 | 0.050033 |
| ENSG00000160588 | <i>MPZL3</i>     | 0.821  | 0.00045  | 0.05462 | 0.809  | 0.00050 | 0.050077 |
| ENSG00000074370 | <i>ATP2A3</i>    | -0.867 | 0.00042  | 0.05240 | -0.839 | 0.00051 | 0.050302 |
| ENSG00000140682 | <i>TGFB111</i>   | -1.361 | 0.00140  | 0.11358 | -1.374 | 0.00051 | 0.050775 |
| ENSG00000157502 | <i>PWWP3B</i>    | -0.732 | 0.00059  | 0.06633 | -0.738 | 0.00052 | 0.051154 |
| ENSG00000139684 | <i>ESD</i>       | -0.728 | 0.00054  | 0.06333 | -0.724 | 0.00052 | 0.051577 |
| ENSG00000159176 | <i>CSRP1</i>     | -0.719 | 0.00068  | 0.07300 | -0.732 | 0.00053 | 0.052113 |
| ENSG00000111275 | <i>ALDH2</i>     | -0.840 | 0.00050  | 0.05928 | -0.811 | 0.00055 | 0.054105 |
| ENSG00000170608 | <i>FOXA3</i>     | -0.861 | 0.00135  | 0.11096 | -0.919 | 0.00056 | 0.054909 |
| ENSG00000163154 | <i>TNFAIP8L2</i> | 1.325  | 0.00072  | 0.07570 | 1.343  | 0.00056 | 0.055008 |
| ENSG00000114270 | <i>COL7A1</i>    | 1.018  | 3.12E-05 | 0.00794 | 0.790  | 0.00056 | 0.055051 |
| ENSG00000109586 | <i>GALNT7</i>    | -0.736 | 0.00068  | 0.07282 | -0.741 | 0.00057 | 0.055376 |
| ENSG00000163545 | <i>NUAK2</i>     | 0.879  | 0.00079  | 0.08089 | 0.891  | 0.00057 | 0.055556 |
| ENSG00000145248 | <i>SLC10A4</i>   | -0.816 | 0.00084  | 0.08361 | -0.834 | 0.00059 | 0.057299 |
| ENSG00000187498 | <i>COL4A1</i>    | 2.075  | 0.00189  | 0.13770 | 2.019  | 0.00060 | 0.057444 |
| ENSG00000141756 | <i>FKBP10</i>    | -0.698 | 0.00090  | 0.08753 | -0.721 | 0.00060 | 0.057770 |
| ENSG00000165471 | <i>MBL2</i>      | 1.729  | 0.00084  | 0.08426 | 1.762  | 0.00060 | 0.057860 |
| ENSG00000142235 | <i>LMTK3</i>     | 0.759  | 0.00103  | 0.09657 | 0.788  | 0.00060 | 0.057860 |
| ENSG00000170542 | <i>SERPINB9</i>  | -0.729 | 0.00073  | 0.07704 | -0.736 | 0.00062 | 0.058748 |
| ENSG00000196776 | <i>CD47</i>      | -0.703 | 0.00109  | 0.09927 | -0.732 | 0.00062 | 0.058748 |
| ENSG00000138613 | <i>APH1B</i>     | -0.960 | 0.00095  | 0.09081 | -0.972 | 0.00062 | 0.058748 |
| ENSG00000189067 | <i>LITAF</i>     | -0.741 | 0.00069  | 0.07302 | -0.746 | 0.00062 | 0.058748 |
| ENSG00000038427 | <i>VCAN</i>      | -0.692 | 0.00077  | 0.07986 | -0.704 | 0.00062 | 0.058835 |
| ENSG00000144118 | <i>RALB</i>      | -0.761 | 0.00051  | 0.06028 | -0.747 | 0.00062 | 0.058835 |
| ENSG00000198467 | <i>TPM2</i>      | 0.686  | 0.00100  | 0.09405 | 0.710  | 0.00062 | 0.058958 |
| ENSG00000109861 | <i>CTSC</i>      | -0.703 | 0.00080  | 0.08142 | -0.716 | 0.00062 | 0.058981 |
| ENSG00000253741 | <i>LNCOC1</i>    | 1.143  | 0.00051  | 0.06028 | 1.106  | 0.00063 | 0.059084 |
| ENSG00000081087 | <i>OSTM1</i>     | -0.777 | 0.00058  | 0.06604 | -0.765 | 0.00063 | 0.059084 |
| ENSG00000100906 | <i>NFKBIA</i>    | 0.724  | 0.00068  | 0.07294 | 0.725  | 0.00064 | 0.059696 |
| ENSG00000172461 | <i>FUT9</i>      | 1.150  | 0.00037  | 0.04666 | 1.089  | 0.00064 | 0.059696 |
| ENSG00000101144 | <i>BMP7</i>      | -1.128 | 0.00284  | 0.17715 | -1.217 | 0.00064 | 0.059696 |
| ENSG00000087589 | <i>CASS4</i>     | 0.980  | 0.00513  | 0.25083 | 1.178  | 0.00064 | 0.059696 |
| ENSG00000165757 | <i>JCAD</i>      | -0.781 | 0.00086  | 0.08504 | -0.800 | 0.00064 | 0.059749 |
| ENSG00000134352 | <i>IL6ST</i>     | -0.736 | 0.00055  | 0.06382 | -0.722 | 0.00065 | 0.060018 |
| ENSG00000198556 | <i>ZNF789</i>    | 0.756  | 0.00064  | 0.07063 | 0.751  | 0.00066 | 0.060957 |
| ENSG00000126351 | <i>THRA</i>      | -0.750 | 0.00109  | 0.09927 | -0.773 | 0.00066 | 0.060957 |
| ENSG00000112183 | <i>RBM24</i>     | -1.315 | 0.00116  | 0.10313 | -1.352 | 0.00066 | 0.060957 |
| ENSG00000068078 | <i>FGFR3</i>     | -0.743 | 0.00084  | 0.08361 | -0.750 | 0.00066 | 0.061245 |
| ENSG00000152689 | <i>RASGRP3</i>   | -0.905 | 0.00473  | 0.23767 | -1.042 | 0.00067 | 0.061447 |
| ENSG00000167767 | <i>KRT80</i>     | 0.740  | 0.00051  | 0.06042 | 0.722  | 0.00067 | 0.061638 |
| ENSG00000069849 | <i>ATP1B3</i>    | -0.697 | 0.00088  | 0.08625 | -0.710 | 0.00067 | 0.061638 |
| ENSG00000123612 | <i>ACVR1C</i>    | -0.910 | 0.00190  | 0.13772 | -0.981 | 0.00067 | 0.061638 |
| ENSG00000242485 | <i>MRPL20</i>    | 0.709  | 0.00098  | 0.09257 | 0.724  | 0.00068 | 0.062032 |
| ENSG00000160401 | <i>CFAP157</i>   | 0.941  | 0.00066  | 0.07169 | 0.933  | 0.00068 | 0.062032 |
| ENSG00000252010 | <i>SCARNA5</i>   | -0.740 | 0.00130  | 0.10868 | -0.742 | 0.00069 | 0.062442 |
| ENSG00000198624 | <i>CCDC69</i>    | -0.933 | 0.00057  | 0.06479 | -0.896 | 0.00069 | 0.062894 |
| ENSG00000128594 | <i>LRRC4</i>     | 0.880  | 0.00068  | 0.07294 | 0.873  | 0.00070 | 0.062979 |
| ENSG00000131069 | <i>ACSS2</i>     | 0.771  | 0.00030  | 0.04005 | 0.718  | 0.00071 | 0.063887 |
| ENSG00000127951 | <i>FGL2</i>      | 1.253  | 0.00042  | 0.05187 | 1.185  | 0.00071 | 0.064166 |
| ENSG00000165929 | <i>TC2N</i>      | -0.771 | 0.00489  | 0.24380 | -0.818 | 0.00073 | 0.065480 |
| ENSG00000253276 | <i>CCDC71L</i>   | -0.739 | 0.00080  | 0.08119 | -0.742 | 0.00074 | 0.066275 |
| ENSG00000138698 | <i>RAP1GDS1</i>  | -0.719 | 0.00059  | 0.06643 | -0.704 | 0.00074 | 0.066473 |
| ENSG00000206258 | <i>TNXB</i>      | 1.207  | 0.00039  | 0.04847 | 0.772  | 0.00075 | 0.066897 |
| ENSG00000005513 | <i>SOX8</i>      | -0.922 | 0.00049  | 0.05894 | -0.886 | 0.00076 | 0.067295 |
| ENSG00000153904 | <i>DDAH1</i>     | -0.691 | 0.00102  | 0.09555 | -0.708 | 0.00076 | 0.067530 |

|                 |                     |        |         |         |        |         |          |
|-----------------|---------------------|--------|---------|---------|--------|---------|----------|
| ENSG00000159403 | <i>C1R</i>          | -0.974 | 0.00372 | 0.20877 | -1.067 | 0.00076 | 0.067530 |
| ENSG00000134285 | <i>FKBP11</i>       | 0.756  | 0.00077 | 0.07986 | 0.755  | 0.00076 | 0.067530 |
| ENSG00000174529 | <i>TMEM81</i>       | 0.960  | 0.00100 | 0.09405 | 0.977  | 0.00077 | 0.067676 |
| ENSG00000168528 | <i>SERINC2</i>      | -0.785 | 0.00093 | 0.08983 | -0.786 | 0.00077 | 0.067705 |
| ENSG00000162998 | <i>FRZB</i>         | 1.104  | 0.00111 | 0.10055 | 1.112  | 0.00078 | 0.068096 |
| ENSG00000169019 | <i>COMMD8</i>       | -0.791 | 0.00043 | 0.05254 | -0.747 | 0.00078 | 0.068096 |
| ENSG00000143869 | <i>GDF7</i>         | 1.164  | 0.00078 | 0.08054 | 1.161  | 0.00078 | 0.068383 |
| ENSG00000134007 | <i>ADAM20</i>       | 1.358  | 0.00031 | 0.04005 | 1.194  | 0.00080 | 0.069498 |
| ENSG00000179954 | <i>SSC5D</i>        | 1.037  | 0.00428 | 0.22603 | 1.194  | 0.00080 | 0.069498 |
| ENSG00000153933 | <i>DGKE</i>         | -0.802 | 0.00139 | 0.11318 | -0.828 | 0.00081 | 0.069957 |
| ENSG00000138347 | <i>MYPN</i>         | 1.249  | 0.00212 | 0.14791 | 1.283  | 0.00081 | 0.069992 |
| ENSG00000144306 | <i>SCRN3</i>        | -0.815 | 0.00058 | 0.06598 | -0.781 | 0.00081 | 0.070042 |
| ENSG00000139998 | <i>RAB15</i>        | -0.758 | 0.00110 | 0.09972 | -0.774 | 0.00082 | 0.070597 |
| ENSG00000049768 | <i>FOXP3</i>        | 2.131  | 0.00125 | 0.10738 | 2.182  | 0.00082 | 0.070662 |
| ENSG00000152229 | <i>PSTPIP2</i>      | -0.697 | 0.00134 | 0.11090 | -0.717 | 0.00083 | 0.071599 |
| ENSG00000177000 | <i>MTHFR</i>        | 0.773  | 0.00080 | 0.08119 | 0.765  | 0.00084 | 0.072054 |
| ENSG00000259158 | <i>ADAM20P1</i>     | 1.314  | 0.00222 | 0.15314 | 1.353  | 0.00085 | 0.072549 |
| ENSG00000147852 | <i>VLDLR</i>        | 1.273  | 0.00108 | 0.09927 | 1.291  | 0.00086 | 0.073212 |
| ENSG00000049860 | <i>HEXB</i>         | -0.673 | 0.00151 | 0.11901 | -0.700 | 0.00086 | 0.073328 |
| ENSG00000101977 | <i>MCF2</i>         | 1.855  | 0.00128 | 0.10751 | 1.774  | 0.00086 | 0.073746 |
| ENSG00000143127 | <i>ITGA10</i>       | 1.237  | 0.00120 | 0.10499 | 1.167  | 0.00088 | 0.074677 |
| ENSG00000164509 | <i>IL31RA</i>       | 2.022  | 0.00060 | 0.06643 | 1.896  | 0.00088 | 0.074944 |
| ENSG00000121743 | <i>GJA3</i>         | -0.793 | 0.00067 | 0.07273 | -0.773 | 0.00090 | 0.075881 |
| ENSG00000077274 | <i>CAPN6</i>        | -0.893 | 0.00133 | 0.11052 | -0.903 | 0.00091 | 0.076506 |
| ENSG00000160752 | <i>FDPS</i>         | 0.746  | 0.00045 | 0.05455 | 0.696  | 0.00091 | 0.076506 |
| ENSG00000128016 | <i>ZFP36</i>        | 0.737  | 0.00077 | 0.07998 | 0.725  | 0.00092 | 0.076582 |
| ENSG00000242265 | <i>PEG10</i>        | -0.854 | 0.00125 | 0.10751 | -0.877 | 0.00092 | 0.076582 |
| ENSG00000075826 | <i>SEC31B</i>       | 0.702  | 0.00136 | 0.11158 | 0.719  | 0.00092 | 0.076582 |
| ENSG00000112893 | <i>MAN2A1</i>       | -0.690 | 0.00099 | 0.09405 | -0.693 | 0.00092 | 0.076956 |
| ENSG00000167004 | <i>PDIA3</i>        | -0.651 | 0.00168 | 0.12859 | -0.683 | 0.00093 | 0.077028 |
| ENSG00000127946 | <i>HIP1</i>         | -0.680 | 0.00157 | 0.12265 | -0.706 | 0.00093 | 0.077028 |
| ENSG00000173402 | <i>DAG1</i>         | -0.678 | 0.00109 | 0.09927 | -0.687 | 0.00093 | 0.077044 |
| ENSG00000103067 | <i>ESRP2</i>        | -0.696 | 0.00112 | 0.10078 | -0.703 | 0.00093 | 0.077123 |
| ENSG00000120693 | <i>SMAD9</i>        | -0.789 | 0.00117 | 0.10366 | -0.799 | 0.00093 | 0.077123 |
| ENSG00000269896 | <i>LOC100129534</i> | 0.919  | 0.00088 | 0.08625 | 0.910  | 0.00094 | 0.077123 |
| ENSG00000101000 | <i>PROCR</i>        | -0.772 | 0.00136 | 0.11158 | -0.792 | 0.00094 | 0.077123 |
| ENSG00000087085 | <i>ACHE</i>         | -1.057 | 0.00073 | 0.07690 | -1.009 | 0.00094 | 0.077123 |
| ENSG00000185551 | <i>NR2F2</i>        | -0.695 | 0.00095 | 0.09081 | -0.695 | 0.00094 | 0.077123 |
| ENSG00000151690 | <i>MFSD6</i>        | -0.748 | 0.00159 | 0.12308 | -0.783 | 0.00094 | 0.077123 |
| ENSG00000107954 | <i>NEURL1</i>       | -1.077 | 0.00106 | 0.09779 | -1.056 | 0.00095 | 0.077123 |
| ENSG00000274194 | <i>MBOAT7</i>       | 0.869  | 0.00238 | 0.15961 | 0.706  | 0.00095 | 0.077123 |
| ENSG00000112394 | <i>SLC16A10</i>     | -0.785 | 0.00076 | 0.07974 | -0.769 | 0.00095 | 0.077246 |
| ENSG00000049323 | <i>LTBP1</i>        | -0.729 | 0.00126 | 0.10751 | -0.733 | 0.00097 | 0.078654 |
| ENSG00000119326 | <i>CTNNAL1</i>      | -0.674 | 0.00120 | 0.10514 | -0.684 | 0.00097 | 0.078654 |
| ENSG00000083444 | <i>PLOD1</i>        | -0.633 | 0.00226 | 0.15451 | -0.682 | 0.00098 | 0.079170 |
| ENSG00000255150 | <i>EID3</i>         | 0.766  | 0.00083 | 0.08322 | 0.756  | 0.00098 | 0.079350 |
| ENSG00000106537 | <i>TSPAN13</i>      | -0.764 | 0.00094 | 0.09065 | -0.753 | 0.00098 | 0.079350 |
| ENSG00000108846 | <i>ABCC3</i>        | 0.711  | 0.00078 | 0.08054 | 0.696  | 0.00098 | 0.079350 |
| ENSG00000204304 | <i>PBX2</i>         | 0.857  | 0.00094 | 0.09008 | 0.702  | 0.00098 | 0.079350 |
| ENSG00000100934 | <i>SEC23A</i>       | 0.657  | 0.00170 | 0.12902 | 0.687  | 0.00099 | 0.079350 |
| ENSG00000240280 | <i>TCAM1P</i>       | -0.904 | 0.00088 | 0.08643 | -0.856 | 0.00099 | 0.079350 |
| ENSG00000167861 | <i>HID1</i>         | -0.800 | 0.00110 | 0.09972 | -0.782 | 0.00100 | 0.079888 |
| ENSG00000122591 | <i>FAM126A</i>      | -0.698 | 0.00108 | 0.09927 | -0.701 | 0.00100 | 0.079888 |
| ENSG00000185864 | <i>NPIP4</i>        | 0.685  | 0.00182 | 0.13469 | 0.685  | 0.00100 | 0.080011 |
| ENSG00000164323 | <i>CFAP97</i>       | -0.684 | 0.00100 | 0.09432 | -0.683 | 0.00102 | 0.081306 |
| ENSG00000116141 | <i>MARK1</i>        | -0.756 | 0.00069 | 0.07302 | -0.721 | 0.00102 | 0.081382 |

|                 |                     |        |         |         |        |         |          |
|-----------------|---------------------|--------|---------|---------|--------|---------|----------|
| ENSG00000124493 | <i>GRM4</i>         | -0.860 | 0.00339 | 0.19758 | -0.944 | 0.00102 | 0.081382 |
| ENSG00000109501 | <i>WFS1</i>         | -0.674 | 0.00228 | 0.15497 | -0.719 | 0.00102 | 0.081556 |
| ENSG00000123901 | <i>GPR83</i>        | 1.331  | 0.00018 | 0.02788 | 1.121  | 0.00104 | 0.082157 |
| ENSG00000101440 | <i>ASIP</i>         | 1.124  | 0.00104 | 0.09658 | 1.121  | 0.00104 | 0.082157 |
| ENSG00000174871 | <i>CNIH2</i>        | -1.085 | 0.00224 | 0.15371 | -1.156 | 0.00104 | 0.082157 |
| ENSG00000262999 | <i>LOC101927131</i> | 1.119  | 0.00087 | 0.08569 | 1.080  | 0.00105 | 0.083448 |
| ENSG00000157064 | <i>NMNAT2</i>       | 1.053  | 0.00151 | 0.11889 | 1.080  | 0.00105 | 0.083448 |
| ENSG00000166130 | <i>IKBIP</i>        | -0.760 | 0.00108 | 0.09927 | -0.758 | 0.00106 | 0.083680 |
| ENSG00000213906 | <i>LTB4R2</i>       | 0.950  | 0.00114 | 0.10193 | 0.829  | 0.00107 | 0.084220 |
| ENSG00000118785 | <i>SPP1</i>         | 1.126  | 0.00835 | 0.33438 | 1.269  | 0.00108 | 0.084500 |
| ENSG00000143870 | <i>PDIA6</i>        | -0.641 | 0.00227 | 0.15456 | -0.682 | 0.00108 | 0.084500 |
| ENSG00000138463 | <i>SLC49A4</i>      | -0.760 | 0.00095 | 0.09065 | -0.743 | 0.00109 | 0.084513 |
| ENSG00000163755 | <i>HPS3</i>         | -0.735 | 0.00134 | 0.11060 | -0.736 | 0.00109 | 0.084513 |
| ENSG00000141448 | <i>GATA6</i>        | -0.822 | 0.00139 | 0.11318 | -0.824 | 0.00109 | 0.084602 |
| ENSG00000135916 | <i>ITM2C</i>        | -0.728 | 0.00065 | 0.07123 | -0.694 | 0.00109 | 0.084772 |
| ENSG00000064115 | <i>TM7SF3</i>       | -0.737 | 0.00062 | 0.06901 | -0.697 | 0.00110 | 0.085408 |
| ENSG00000169246 | <i>NPIPB3</i>       | 0.596  | 0.00820 | 0.32983 | 0.681  | 0.00111 | 0.085713 |
| ENSG00000136997 | <i>MYC</i>          | -0.668 | 0.00120 | 0.10514 | -0.672 | 0.00111 | 0.085725 |
| ENSG00000180525 | <i>PRR26</i>        | 0.797  | 0.00212 | 0.14791 | 0.841  | 0.00111 | 0.085725 |
| ENSG00000146233 | <i>CYP39A1</i>      | -1.008 | 0.00327 | 0.19347 | -1.082 | 0.00112 | 0.086254 |
| ENSG00000146453 | <i>PNLDC1</i>       | 1.211  | 0.00232 | 0.15652 | 1.228  | 0.00112 | 0.086254 |
| ENSG00000143416 | <i>SELENBP1</i>     | -1.637 | 0.00058 | 0.06552 | -1.411 | 0.00113 | 0.086644 |
| ENSG00000160161 | <i>CILP2</i>        | -0.728 | 0.00103 | 0.09657 | -0.719 | 0.00114 | 0.087071 |
| ENSG00000149591 | <i>TAGLN</i>        | 0.886  | 0.00156 | 0.12233 | 0.891  | 0.00114 | 0.087103 |
| ENSG00000147883 | <i>CDKN2B</i>       | 0.702  | 0.00086 | 0.08504 | 0.685  | 0.00115 | 0.087525 |
| ENSG00000170965 | <i>PLAC1</i>        | -1.265 | 0.00192 | 0.13820 | -1.250 | 0.00115 | 0.087604 |
| ENSG00000101928 | <i>MOSPD1</i>       | -0.678 | 0.00140 | 0.11371 | -0.688 | 0.00115 | 0.087624 |
| ENSG00000070081 | <i>NUCB2</i>        | -0.719 | 0.00110 | 0.09972 | -0.706 | 0.00116 | 0.087847 |
| ENSG00000135709 | <i>KIAA0513</i>     | -0.706 | 0.00134 | 0.11060 | -0.710 | 0.00116 | 0.087996 |
| ENSG00000133138 | <i>TBC1D8B</i>      | -0.703 | 0.00128 | 0.10751 | -0.704 | 0.00118 | 0.088904 |
| ENSG00000106328 | <i>FSCN3</i>        | 2.962  | 0.00201 | 0.14239 | 3.045  | 0.00119 | 0.088904 |
| ENSG00000159200 | <i>RCAN1</i>        | -0.737 | 0.00194 | 0.13898 | -0.763 | 0.00119 | 0.088904 |
| ENSG00000231889 | <i>TRAF3IP2-AS1</i> | 0.902  | 0.00087 | 0.08569 | 0.882  | 0.00119 | 0.088904 |
| ENSG00000156515 | <i>HK1</i>          | -0.692 | 0.00144 | 0.11559 | -0.692 | 0.00120 | 0.088904 |
| ENSG00000004660 | <i>CAMKK1</i>       | 0.717  | 0.00318 | 0.19072 | 0.770  | 0.00120 | 0.088904 |
| ENSG00000148700 | <i>ADD3</i>         | -0.696 | 0.00127 | 0.10751 | -0.694 | 0.00120 | 0.089077 |
| ENSG00000079819 | <i>EPB41L2</i>      | -0.675 | 0.00119 | 0.10447 | -0.672 | 0.00122 | 0.090214 |
| ENSG00000085741 | <i>WNT11</i>        | -1.535 | 0.00339 | 0.19758 | -1.663 | 0.00122 | 0.090214 |
| ENSG00000186642 | <i>PDE2A</i>        | -1.485 | 0.00718 | 0.30770 | -1.663 | 0.00122 | 0.090214 |
| ENSG00000140511 | <i>HAPLN3</i>       | -1.001 | 0.00192 | 0.13820 | -1.013 | 0.00123 | 0.090409 |
| ENSG00000141542 | <i>RAB40B</i>       | -0.842 | 0.00128 | 0.10751 | -0.820 | 0.00123 | 0.090752 |
| ENSG00000185513 | <i>L3MBTL1</i>      | 0.724  | 0.00083 | 0.08348 | 0.697  | 0.00124 | 0.091023 |
| ENSG00000105605 | <i>CACNG7</i>       | -2.255 | 0.00076 | 0.07937 | -2.057 | 0.00125 | 0.091141 |
| ENSG00000146038 | <i>DCDC2</i>        | 2.017  | 0.00285 | 0.17715 | 2.128  | 0.00125 | 0.091141 |
| ENSG00000153060 | <i>TEKT5</i>        | 2.082  | 0.00433 | 0.22662 | 2.128  | 0.00125 | 0.091141 |
| ENSG00000178695 | <i>KCTD12</i>       | -1.029 | 0.00147 | 0.11806 | -1.046 | 0.00125 | 0.091189 |
| ENSG00000078081 | <i>LAMP3</i>        | -1.077 | 0.00338 | 0.19758 | -1.140 | 0.00126 | 0.091500 |
| ENSG00000164251 | <i>F2RL1</i>        | -0.684 | 0.00125 | 0.10738 | -0.682 | 0.00126 | 0.091777 |
| ENSG00000255568 | <i>BRWD1-AS2</i>    | -6.321 | 0.00242 | 0.16037 | -6.458 | 0.00127 | 0.091777 |
| ENSG00000137558 | <i>PI15</i>         | 1.855  | 0.00128 | 0.10751 | 1.852  | 0.00128 | 0.092469 |
| ENSG00000164023 | <i>SGMS2</i>        | -0.672 | 0.00167 | 0.12797 | -0.687 | 0.00129 | 0.092762 |
| ENSG00000285533 | <i>RELA-DT</i>      | 1.968  | 0.00191 | 0.13772 | 1.926  | 0.00129 | 0.092776 |
| ENSG00000213424 | <i>KRT222</i>       | -1.083 | 0.00395 | 0.21680 | -1.170 | 0.00131 | 0.094003 |
| ENSG00000204128 | <i>C2orf72</i>      | -1.407 | 0.00113 | 0.10169 | -1.348 | 0.00131 | 0.094040 |
| ENSG00000147650 | <i>LRP12</i>        | -0.712 | 0.00196 | 0.14007 | -0.732 | 0.00131 | 0.094040 |
| ENSG00000144827 | <i>ABHD10</i>       | -0.676 | 0.00116 | 0.10324 | -0.667 | 0.00132 | 0.094222 |



|                 |                   |        |          |         |        |         |          |
|-----------------|-------------------|--------|----------|---------|--------|---------|----------|
| ENSG00000148803 | <i>FUOM</i>       | -0.910 | 0.00089  | 0.08704 | -0.844 | 0.00132 | 0.094222 |
| ENSG00000178764 | <i>ZHX2</i>       | -0.756 | 0.00139  | 0.11336 | -0.759 | 0.00133 | 0.094367 |
| ENSG00000175899 | <i>A2M</i>        | 0.931  | 0.00140  | 0.11363 | 0.929  | 0.00133 | 0.094774 |
| ENSG00000144935 | <i>TRPC1</i>      | -0.870 | 0.00171  | 0.12918 | -0.884 | 0.00134 | 0.094774 |
| ENSG00000008300 | <i>CELSR3</i>     | 0.685  | 0.00143  | 0.11495 | 0.686  | 0.00134 | 0.094774 |
| ENSG00000120215 | <i>MLANA</i>      | 0.880  | 0.00230  | 0.15571 | 0.917  | 0.00135 | 0.095039 |
| ENSG00000243970 | <i>PPIEL</i>      | 0.722  | 0.00151  | 0.11901 | 0.724  | 0.00135 | 0.095049 |
| ENSG00000115129 | <i>TP53I3</i>     | -0.773 | 0.00167  | 0.12797 | -0.772 | 0.00135 | 0.095238 |
| ENSG00000064666 | <i>CNN2</i>       | 0.695  | 0.00086  | 0.08504 | 0.665  | 0.00136 | 0.095683 |
| ENSG00000143320 | <i>CRABP2</i>     | -0.692 | 0.00088  | 0.08643 | -0.665 | 0.00137 | 0.095976 |
| ENSG00000112715 | <i>VEGFA</i>      | 0.657  | 0.00182  | 0.13469 | 0.673  | 0.00137 | 0.096145 |
| ENSG00000015475 | <i>BID</i>        | -0.702 | 0.00114  | 0.10220 | -0.688 | 0.00137 | 0.096177 |
| ENSG00000111328 | <i>CDK2AP1</i>    | -0.636 | 0.00284  | 0.17715 | -0.676 | 0.00138 | 0.096378 |
| ENSG00000161682 | <i>FAM171A2</i>   | -0.798 | 0.00092  | 0.08907 | -0.764 | 0.00139 | 0.096712 |
| ENSG00000197043 | <i>ANXA6</i>      | -0.677 | 0.00150  | 0.11877 | -0.672 | 0.00139 | 0.096973 |
| ENSG00000276068 | <i>NAIP</i>       | 0.707  | 0.00475  | 0.23866 | 0.678  | 0.00140 | 0.097171 |
| ENSG00000197329 | <i>PELI1</i>      | -0.690 | 0.00451  | 0.23192 | -0.765 | 0.00141 | 0.097649 |
| ENSG00000128039 | <i>SRD5A3</i>     | -0.679 | 0.00298  | 0.18330 | -0.726 | 0.00141 | 0.097808 |
| ENSG00000101347 | <i>SAMHD1</i>     | -0.661 | 0.00191  | 0.13816 | -0.677 | 0.00143 | 0.098618 |
| ENSG00000128590 | <i>DNAJB9</i>     | -0.710 | 0.00165  | 0.12688 | -0.713 | 0.00143 | 0.098706 |
| ENSG00000188677 | <i>PARVB</i>      | -0.751 | 0.00106  | 0.09830 | -0.713 | 0.00144 | 0.099360 |
| ENSG00000162627 | <i>SNX7</i>       | -0.679 | 0.00219  | 0.15144 | -0.696 | 0.00145 | 0.099423 |
| ENSG00000140948 | <i>ZCCHC14</i>    | -0.650 | 0.00190  | 0.13772 | -0.666 | 0.00145 | 0.099457 |
| ENSG00000260852 | <i>FBXL19-AS1</i> | 0.761  | 0.00118  | 0.10396 | 0.749  | 0.00146 | 0.100242 |
| ENSG00000172086 | <i>KRCC1</i>      | -0.737 | 0.00223  | 0.15343 | -0.760 | 0.00146 | 0.100242 |
| ENSG00000243716 | <i>NPIP5</i>      | 0.605  | 0.00453  | 0.23236 | 0.660  | 0.00147 | 0.100317 |
| ENSG00000137509 | <i>PRCP</i>       | -0.648 | 0.00269  | 0.17191 | -0.682 | 0.00148 | 0.100806 |
| ENSG00000151553 | <i>FAM160B1</i>   | -0.676 | 0.00158  | 0.12297 | -0.677 | 0.00148 | 0.100942 |
| ENSG00000164237 | <i>CMBL</i>       | -0.704 | 0.00105  | 0.09737 | -0.678 | 0.00148 | 0.100942 |
| ENSG00000183691 | <i>NOG</i>        | -2.575 | 0.00149  | 0.11820 | -2.578 | 0.00149 | 0.101054 |
| ENSG00000221963 | <i>APOL6</i>      | 1.614  | 0.00229  | 0.15553 | 1.578  | 0.00149 | 0.101054 |
| ENSG00000198598 | <i>MMP17</i>      | -0.799 | 0.00433  | 0.22662 | -0.865 | 0.00149 | 0.101054 |
| ENSG00000167384 | <i>ZNF180</i>     | -0.707 | 0.00166  | 0.12758 | -0.711 | 0.00150 | 0.101332 |
| ENSG00000129538 | <i>RNASE1</i>     | 0.878  | 0.00101  | 0.09528 | 0.846  | 0.00152 | 0.102151 |
| ENSG00000197580 | <i>BCO2</i>       | 0.840  | 0.00123  | 0.10669 | 0.809  | 0.00152 | 0.102224 |
| ENSG00000196083 | <i>IL1RAP</i>     | -0.785 | 0.00190  | 0.13772 | -0.790 | 0.00153 | 0.102704 |
| ENSG00000114646 | <i>CSPG5</i>      | -0.741 | 0.00342  | 0.19844 | -0.790 | 0.00153 | 0.102704 |
| ENSG00000184432 | <i>COPB2</i>      | -0.631 | 0.00236  | 0.15843 | -0.654 | 0.00156 | 0.104319 |
| ENSG00000164466 | <i>SFXN1</i>      | -0.647 | 0.00184  | 0.13559 | -0.656 | 0.00157 | 0.104765 |
| ENSG00000076641 | <i>PAG1</i>       | -0.754 | 0.00222  | 0.15327 | -0.773 | 0.00158 | 0.105797 |
| ENSG00000182287 | <i>AP1S2</i>      | -0.702 | 0.00158  | 0.12306 | -0.693 | 0.00159 | 0.105838 |
| ENSG00000102057 | <i>KCND1</i>      | 0.752  | 0.00117  | 0.10366 | 0.729  | 0.00159 | 0.105838 |
| ENSG00000255284 | <i>LOC171391</i>  | 0.891  | 0.00269  | 0.17191 | 0.918  | 0.00159 | 0.105838 |
| ENSG00000148154 | <i>UGCG</i>       | -0.679 | 0.00132  | 0.11004 | -0.666 | 0.00159 | 0.105838 |
| ENSG00000176658 | <i>MYO1D</i>      | -0.683 | 0.00169  | 0.12871 | -0.682 | 0.00161 | 0.106596 |
| ENSG00000163516 | <i>ANKZF1</i>     | 0.715  | 0.00101  | 0.09528 | 0.680  | 0.00161 | 0.106667 |
| ENSG00000142552 | <i>RCN3</i>       | -1.744 | 7.10E-06 | 0.00250 | -1.099 | 0.00162 | 0.107173 |
| ENSG00000119138 | <i>KLF9</i>       | -0.882 | 0.00171  | 0.12947 | -0.886 | 0.00164 | 0.107871 |
| ENSG00000171811 | <i>CFAP46</i>     | 0.981  | 0.00114  | 0.10193 | 0.900  | 0.00164 | 0.107871 |
| ENSG00000198064 | <i>NPIP13</i>     | 0.671  | 0.00273  | 0.17341 | 0.658  | 0.00164 | 0.107871 |
| ENSG00000104783 | <i>KCNN4</i>      | -0.652 | 0.00309  | 0.18676 | -0.690 | 0.00165 | 0.108585 |
| ENSG00000118855 | <i>MFSD1</i>      | -0.647 | 0.00456  | 0.23309 | -0.699 | 0.00166 | 0.108903 |
| ENSG00000164161 | <i>HHIP</i>       | 1.224  | 0.00270  | 0.17191 | 1.271  | 0.00167 | 0.109182 |
| ENSG00000240370 | <i>RPL13P5</i>    | 0.902  | 0.00146  | 0.11690 | 0.885  | 0.00167 | 0.109182 |
| ENSG00000086730 | <i>LAT2</i>       | 0.763  | 0.00172  | 0.12947 | 0.749  | 0.00167 | 0.109182 |
| ENSG00000147166 | <i>ITGB1BP2</i>   | 0.823  | 0.00182  | 0.13495 | 0.820  | 0.00167 | 0.109182 |

|                 |                     |        |         |         |        |         |          |
|-----------------|---------------------|--------|---------|---------|--------|---------|----------|
| ENSG00000184489 | <i>PTP4A3</i>       | -1.001 | 0.00871 | 0.34279 | -0.923 | 0.00167 | 0.109182 |
| ENSG00000163527 | <i>STT3B</i>        | -0.625 | 0.00248 | 0.16329 | -0.648 | 0.00168 | 0.109399 |
| ENSG00000141179 | <i>PCTP</i>         | -0.676 | 0.00465 | 0.23504 | -0.739 | 0.00168 | 0.109533 |
| ENSG00000141497 | <i>ZMYND15</i>      | -1.604 | 0.00079 | 0.08113 | -1.424 | 0.00169 | 0.109805 |
| ENSG00000072657 | <i>TRHDE</i>        | -1.472 | 0.00192 | 0.13820 | -1.424 | 0.00169 | 0.109805 |
| ENSG00000108784 | <i>NAGLU</i>        | -0.817 | 0.00165 | 0.12688 | -0.813 | 0.00169 | 0.109805 |
| ENSG00000125354 | <i>SEPTIN6</i>      | -0.711 | 0.00294 | 0.18164 | -0.737 | 0.00171 | 0.110048 |
| ENSG00000184898 | <i>RBM43</i>        | -0.948 | 0.00202 | 0.14248 | -0.952 | 0.00171 | 0.110048 |
| ENSG00000183186 | <i>C2CD4C</i>       | -1.291 | 0.00222 | 0.15314 | -1.321 | 0.00171 | 0.110048 |
| ENSG00000107831 | <i>FGF8</i>         | 1.327  | 0.00239 | 0.15984 | 1.339  | 0.00171 | 0.110048 |
| ENSG00000187123 | <i>LYPD6</i>        | -0.856 | 0.00152 | 0.11976 | -0.838 | 0.00171 | 0.110048 |
| ENSG00000184897 | <i>H1-10</i>        | 0.670  | 0.00169 | 0.12871 | 0.669  | 0.00171 | 0.110048 |
| ENSG00000132563 | <i>REEP2</i>        | -1.714 | 0.00126 | 0.10751 | -1.623 | 0.00172 | 0.110342 |
| ENSG00000177565 | <i>TBL1XR1</i>      | -0.643 | 0.00188 | 0.13740 | -0.648 | 0.00173 | 0.110611 |
| ENSG00000180884 | <i>ZNF792</i>       | -1.026 | 0.00622 | 0.28294 | -1.156 | 0.00174 | 0.111050 |
| ENSG00000197380 | <i>DACT3</i>        | -1.159 | 0.00186 | 0.13689 | -1.131 | 0.00174 | 0.111146 |
| ENSG00000088367 | <i>EPB41L1</i>      | -0.669 | 0.00335 | 0.19700 | -0.703 | 0.00174 | 0.111146 |
| ENSG00000213853 | <i>EMP2</i>         | -0.668 | 0.00210 | 0.14692 | -0.676 | 0.00176 | 0.111896 |
| ENSG00000112977 | <i>DAP</i>          | -0.664 | 0.00174 | 0.13095 | -0.662 | 0.00176 | 0.111896 |
| ENSG00000235244 | <i>DANT2</i>        | 0.770  | 0.00177 | 0.13253 | 0.761  | 0.00176 | 0.112148 |
| ENSG00000240875 | <i>LINC00886</i>    | 1.037  | 0.00180 | 0.13422 | 1.019  | 0.00177 | 0.112348 |
| ENSG0000006062  | <i>MAP3K14</i>      | 0.672  | 0.00190 | 0.13772 | 0.671  | 0.00177 | 0.112556 |
| ENSG00000101974 | <i>ATP11C</i>       | -0.635 | 0.00267 | 0.17166 | -0.657 | 0.00178 | 0.112882 |
| ENSG00000175220 | <i>ARHGAP1</i>      | -0.627 | 0.00333 | 0.19615 | -0.663 | 0.00179 | 0.113040 |
| ENSG00000165731 | <i>RET</i>          | -1.466 | 0.00047 | 0.05625 | -1.257 | 0.00179 | 0.113164 |
| ENSG00000172594 | <i>SMPDL3A</i>      | -0.883 | 0.00344 | 0.19909 | -0.898 | 0.00180 | 0.113862 |
| ENSG00000170340 | <i>B3GNT2</i>       | -0.679 | 0.00190 | 0.13772 | -0.680 | 0.00182 | 0.114522 |
| ENSG00000154217 | <i>PITPNC1</i>      | -0.684 | 0.00242 | 0.16037 | -0.687 | 0.00183 | 0.114657 |
| ENSG00000162337 | <i>LRP5</i>         | -0.664 | 0.00201 | 0.14240 | -0.665 | 0.00184 | 0.115117 |
| ENSG00000232995 | <i>RGS5</i>         | 0.831  | 0.00137 | 0.11197 | 0.801  | 0.00184 | 0.115117 |
| ENSG00000148730 | <i>EIF4EBP2</i>     | -0.649 | 0.00181 | 0.13469 | -0.648 | 0.00184 | 0.115117 |
| ENSG00000163376 | <i>KBTBD8</i>       | -0.697 | 0.00160 | 0.12400 | -0.688 | 0.00184 | 0.115296 |
| ENSG00000197444 | <i>OGDHL</i>        | -0.885 | 0.00109 | 0.09927 | -0.823 | 0.00186 | 0.115656 |
| ENSG00000237105 | <i>HCP5</i>         | -1.020 | 0.00110 | 0.09972 | -0.739 | 0.00187 | 0.116469 |
| ENSG00000183688 | <i>RFLNB</i>        | -0.920 | 0.00083 | 0.08348 | -0.753 | 0.00188 | 0.116882 |
| ENSG00000230798 | <i>FOXD3-AS1</i>    | -1.836 | 0.00283 | 0.17677 | -1.806 | 0.00189 | 0.117063 |
| ENSG00000214954 | <i>LRRC69</i>       | 0.768  | 0.00141 | 0.11374 | 0.736  | 0.00189 | 0.117140 |
| ENSG00000166819 | <i>PLIN1</i>        | 2.075  | 0.00189 | 0.13770 | 1.964  | 0.00191 | 0.117650 |
| ENSG00000148488 | <i>ST8SIA6</i>      | -1.721 | 0.00616 | 0.28188 | -1.893 | 0.00191 | 0.117650 |
| ENSG00000260917 | <i>LOC103344931</i> | 0.718  | 0.00189 | 0.13770 | 0.717  | 0.00191 | 0.117656 |
| ENSG00000101439 | <i>CST3</i>         | -0.706 | 0.00115 | 0.10286 | -0.671 | 0.00191 | 0.117701 |
| ENSG00000167536 | <i>DHRS13</i>       | -0.771 | 0.00402 | 0.21883 | -0.822 | 0.00193 | 0.118507 |
| ENSG00000252835 | <i>SCARNA21</i>     | -0.666 | 0.00303 | 0.18488 | -0.693 | 0.00194 | 0.119017 |
| ENSG00000119729 | <i>RHOQ</i>         | -0.626 | 0.00447 | 0.23032 | -0.671 | 0.00194 | 0.119224 |
| ENSG00000235437 | <i>LINC01278</i>    | 0.784  | 0.00113 | 0.10155 | 0.740  | 0.00195 | 0.119229 |
| ENSG00000175662 | <i>TOM1L2</i>       | 0.649  | 0.00378 | 0.21135 | 0.687  | 0.00196 | 0.119763 |
| ENSG00000173868 | <i>PHOSPHO1</i>     | -1.199 | 0.00749 | 0.31537 | -1.354 | 0.00196 | 0.119763 |
| ENSG00000068615 | <i>REEP1</i>        | -0.707 | 0.00234 | 0.15740 | -0.713 | 0.00196 | 0.119763 |
| ENSG00000164172 | <i>MOCS2</i>        | -0.642 | 0.00255 | 0.16678 | -0.657 | 0.00196 | 0.119763 |
| ENSG00000107537 | <i>PHYH</i>         | -0.752 | 0.00278 | 0.17545 | -0.736 | 0.00198 | 0.120375 |
| ENSG00000092964 | <i>DPYSL2</i>       | -0.636 | 0.00260 | 0.16904 | -0.650 | 0.00200 | 0.121303 |
| ENSG00000135324 | <i>MRAP2</i>        | -1.150 | 0.00270 | 0.17191 | -1.169 | 0.00200 | 0.121356 |
| ENSG00000177875 | <i>CCDC184</i>      | -2.886 | 0.00201 | 0.14239 | -2.889 | 0.00201 | 0.121424 |
| ENSG00000108342 | <i>CSF3</i>         | 2.962  | 0.00201 | 0.14239 | 2.959  | 0.00201 | 0.121424 |
| ENSG00000166183 | <i>ASPG</i>         | -1.431 | 0.00278 | 0.17545 | -1.470 | 0.00204 | 0.122998 |
| ENSG00000105173 | <i>CCNE1</i>        | -0.588 | 0.00632 | 0.28630 | -0.657 | 0.00205 | 0.123175 |

|                 |                  |        |         |         |        |         |          |
|-----------------|------------------|--------|---------|---------|--------|---------|----------|
| ENSG00000260097 | <i>SPDYE6</i>    | 0.766  | 0.00664 | 0.29219 | 0.690  | 0.00205 | 0.123375 |
| ENSG00000170049 | <i>KCNAB3</i>    | 0.803  | 0.00316 | 0.18961 | 0.821  | 0.00205 | 0.123464 |
| ENSG00000218336 | <i>TENM3</i>     | -0.680 | 0.00158 | 0.12306 | -0.660 | 0.00206 | 0.123468 |
| ENSG00000138622 | <i>HCN4</i>      | -0.905 | 0.00279 | 0.17551 | -0.921 | 0.00206 | 0.123690 |
| ENSG00000243742 | <i>RPLP0P2</i>   | -0.767 | 0.00541 | 0.26042 | -0.874 | 0.00212 | 0.126737 |
| ENSG00000272610 | <i>MAGI1-IT1</i> | 1.094  | 0.00186 | 0.13689 | 1.071  | 0.00212 | 0.126737 |
| ENSG00000037749 | <i>MFAP3</i>     | -0.632 | 0.00352 | 0.20097 | -0.664 | 0.00213 | 0.126737 |
| ENSG00000137364 | <i>TPMT</i>      | -0.641 | 0.00489 | 0.24380 | -0.685 | 0.00213 | 0.126737 |
| ENSG00000126821 | <i>SGPP1</i>     | -0.700 | 0.00233 | 0.15701 | -0.668 | 0.00213 | 0.126737 |
| ENSG00000228570 | <i>NUTM2E</i>    | 0.870  | 0.00299 | 0.18333 | 0.709  | 0.00213 | 0.126763 |
| ENSG00000116191 | <i>RALGPS2</i>   | -0.655 | 0.00272 | 0.17303 | -0.667 | 0.00215 | 0.127515 |
| ENSG00000257815 | <i>CNOT2-DT</i>  | 1.111  | 0.00527 | 0.25533 | 1.202  | 0.00215 | 0.127651 |
| ENSG00000166856 | <i>GPR182</i>    | 1.169  | 0.00149 | 0.11820 | 1.166  | 0.00216 | 0.127816 |
| ENSG0000013588  | <i>GPRC5A</i>    | -0.638 | 0.00213 | 0.14823 | -0.636 | 0.00220 | 0.129801 |
| ENSG00000198108 | <i>CHSY3</i>     | -0.959 | 0.00213 | 0.14823 | -0.950 | 0.00220 | 0.129801 |
| ENSG00000189350 | <i>TOGARAM2</i>  | -0.885 | 0.00149 | 0.11820 | -0.817 | 0.00220 | 0.129899 |
| ENSG00000171241 | <i>SHCBP1</i>    | -0.612 | 0.00350 | 0.20066 | -0.639 | 0.00223 | 0.131348 |
| ENSG00000105137 | <i>SYDE1</i>     | -0.896 | 0.00172 | 0.12947 | -0.855 | 0.00224 | 0.131649 |
| ENSG00000196878 | <i>LAMB3</i>     | 0.647  | 0.00218 | 0.15070 | 0.643  | 0.00224 | 0.131649 |
| ENSG00000187730 | <i>GABRD</i>     | -0.999 | 0.00161 | 0.12422 | -0.918 | 0.00225 | 0.132052 |
| ENSG00000248508 | <i>SRP14-AS1</i> | 0.853  | 0.00127 | 0.10751 | 0.792  | 0.00226 | 0.132582 |
| ENSG00000131746 | <i>TNS4</i>      | -0.656 | 0.00180 | 0.13422 | -0.640 | 0.00227 | 0.133109 |
| ENSG00000165046 | <i>LETM2</i>     | -0.801 | 0.00218 | 0.15074 | -0.779 | 0.00227 | 0.133109 |
| ENSG00000203780 | <i>FANK1</i>     | 0.973  | 0.00019 | 0.02870 | 0.773  | 0.00228 | 0.133125 |
| ENSG00000205133 | <i>TRIQQ</i>     | -0.666 | 0.00328 | 0.19406 | -0.683 | 0.00230 | 0.133954 |
| ENSG00000099139 | <i>PCSK5</i>     | -0.701 | 0.00208 | 0.14613 | -0.683 | 0.00230 | 0.134155 |
| ENSG00000136783 | <i>NIPSNAP3A</i> | -0.744 | 0.00319 | 0.19125 | -0.739 | 0.00231 | 0.134516 |
| ENSG00000157087 | <i>ATP2B2</i>    | -1.256 | 0.00123 | 0.10656 | -1.141 | 0.00232 | 0.134920 |
| ENSG00000149418 | <i>ST14</i>      | -0.635 | 0.00236 | 0.15853 | -0.634 | 0.00233 | 0.135054 |
| ENSG00000183018 | <i>SPNS2</i>     | 0.880  | 0.00060 | 0.06643 | 0.773  | 0.00233 | 0.135252 |
| ENSG00000163110 | <i>PDLIM5</i>    | -0.613 | 0.00371 | 0.20847 | -0.640 | 0.00234 | 0.135274 |
| ENSG00000170545 | <i>SMAGP</i>     | -0.684 | 0.00205 | 0.14440 | -0.672 | 0.00234 | 0.135274 |
| ENSG00000122779 | <i>TRIM24</i>    | -0.584 | 0.00592 | 0.27499 | -0.642 | 0.00236 | 0.135987 |
| ENSG00000117899 | <i>MESD</i>      | -0.622 | 0.00310 | 0.18726 | -0.639 | 0.00237 | 0.136092 |
| ENSG00000155189 | <i>AGPAT5</i>    | -0.648 | 0.00226 | 0.15453 | -0.633 | 0.00237 | 0.136092 |
| ENSG00000203883 | <i>SOX18</i>     | -1.008 | 0.00128 | 0.10751 | -0.918 | 0.00238 | 0.136655 |
| ENSG00000163349 | <i>HIPK1</i>     | -0.626 | 0.00264 | 0.17118 | -0.631 | 0.00239 | 0.136915 |
| ENSG00000148848 | <i>ADAM12</i>    | 0.975  | 0.00337 | 0.19758 | 1.003  | 0.00239 | 0.137030 |
| ENSG00000105784 | <i>RUNDC3B</i>   | -0.741 | 0.00431 | 0.22662 | -0.779 | 0.00242 | 0.137965 |
| ENSG00000239264 | <i>TXNDC5</i>    | -0.812 | 0.00173 | 0.13032 | -0.791 | 0.00242 | 0.137965 |
| ENSG00000175967 | <i>FLJ34503</i>  | 6.359  | 0.00242 | 0.16037 | 6.358  | 0.00242 | 0.137965 |
| ENSG00000196196 | <i>HRCT1</i>     | 6.359  | 0.00242 | 0.16037 | 6.358  | 0.00242 | 0.137965 |
| ENSG00000152931 | <i>PART1</i>     | 3.049  | 0.00119 | 0.10447 | 2.571  | 0.00243 | 0.137983 |
| ENSG00000165996 | <i>HACD1</i>     | -0.768 | 0.00202 | 0.14269 | -0.737 | 0.00244 | 0.138413 |
| ENSG00000115839 | <i>RAB3GAP1</i>  | -0.647 | 0.00206 | 0.14467 | -0.633 | 0.00245 | 0.138945 |
| ENSG00000118707 | <i>TGIF2</i>     | -0.640 | 0.00299 | 0.18330 | -0.652 | 0.00245 | 0.138945 |
| ENSG00000163623 | <i>NKX6-1</i>    | -1.124 | 0.00163 | 0.12589 | -1.045 | 0.00246 | 0.138945 |
| ENSG00000113763 | <i>UNC5A</i>     | -1.092 | 0.00258 | 0.16774 | -1.045 | 0.00246 | 0.138945 |
| ENSG00000186854 | <i>TRABD2A</i>   | -0.959 | 0.00190 | 0.13772 | -0.927 | 0.00246 | 0.139087 |
| ENSG00000223839 | <i>FAM95B1</i>   | 0.765  | 0.00888 | 0.34775 | 0.708  | 0.00248 | 0.139757 |
| ENSG00000261924 | <i>LOC400627</i> | 0.961  | 0.00227 | 0.15456 | 0.946  | 0.00248 | 0.139757 |
| ENSG00000112414 | <i>ADGRG6</i>    | -0.656 | 0.00210 | 0.14721 | -0.641 | 0.00251 | 0.140524 |
| ENSG00000198478 | <i>SH3BGL2</i>   | -0.680 | 0.00227 | 0.15456 | -0.668 | 0.00251 | 0.140524 |
| ENSG00000187867 | <i>PALM3</i>     | -0.775 | 0.00207 | 0.14511 | -0.752 | 0.00251 | 0.140524 |
| ENSG00000165548 | <i>TMEM63C</i>   | -0.754 | 0.00342 | 0.19844 | -0.754 | 0.00252 | 0.140820 |
| ENSG00000147394 | <i>ZNF185</i>    | -0.685 | 0.00478 | 0.23950 | -0.715 | 0.00254 | 0.141614 |

|                 |                            |        |         |         |        |         |          |
|-----------------|----------------------------|--------|---------|---------|--------|---------|----------|
| ENSG00000122694 | <i>GLIPR2</i>              | -0.717 | 0.00253 | 0.16582 | -0.703 | 0.00255 | 0.141948 |
| ENSG00000182040 | <i>USH1G</i>               | -0.793 | 0.00396 | 0.21729 | -0.821 | 0.00255 | 0.141948 |
| ENSG00000138678 | <i>GPAT3</i>               | -0.615 | 0.00416 | 0.22368 | -0.643 | 0.00256 | 0.142079 |
| ENSG00000140807 | <i>NKD1</i>                | -0.665 | 0.00293 | 0.18126 | -0.671 | 0.00256 | 0.142079 |
| ENSG00000163466 | <i>ARPC2</i>               | -0.601 | 0.00386 | 0.21375 | -0.625 | 0.00256 | 0.142079 |
| ENSG00000235823 | <i>OLMALINC</i>            | 0.720  | 0.00156 | 0.12233 | 0.680  | 0.00260 | 0.143094 |
| ENSG00000177707 | <i>NECTIN3</i>             | -0.612 | 0.00430 | 0.22662 | -0.644 | 0.00260 | 0.143187 |
| ENSG00000049759 | <i>NEDD4L</i>              | -0.619 | 0.00411 | 0.22214 | -0.642 | 0.00261 | 0.143430 |
| ENSG00000103241 | <i>FOXF1</i>               | -0.887 | 0.00400 | 0.21863 | -0.927 | 0.00261 | 0.143556 |
| ENSG00000010017 | <i>RANBP9</i>              | -0.611 | 0.00365 | 0.20604 | -0.630 | 0.00262 | 0.143828 |
| ENSG00000100150 | <i>DEPDC5</i>              | 0.702  | 0.00135 | 0.11096 | 0.652  | 0.00262 | 0.143828 |
| ENSG00000132589 | <i>FLOT2</i>               | -0.585 | 0.00601 | 0.27673 | -0.637 | 0.00263 | 0.144364 |
| ENSG00000165169 | <i>DYNLT3</i>              | -0.687 | 0.00178 | 0.13346 | -0.656 | 0.00264 | 0.144656 |
| ENSG00000159399 | <i>HK2</i>                 | -0.632 | 0.00265 | 0.17149 | -0.630 | 0.00264 | 0.144823 |
| ENSG00000170035 | <i>UBE2E3</i>              | -0.618 | 0.00425 | 0.22539 | -0.637 | 0.00266 | 0.145284 |
| ENSG00000248592 | <i>STIMATE-<br/>MUSTN1</i> | 1.713  | 0.00382 | 0.21185 | 1.759  | 0.00266 | 0.145284 |
| ENSG00000108443 | <i>RPS6KB1</i>             | -0.584 | 0.00507 | 0.24896 | -0.624 | 0.00267 | 0.145284 |
| ENSG00000134013 | <i>LOXL2</i>               | -0.764 | 0.00209 | 0.14663 | -0.728 | 0.00268 | 0.145284 |
| ENSG00000136449 | <i>MYCBPAP</i>             | 2.406  | 0.00639 | 0.28745 | 2.322  | 0.00268 | 0.145284 |
| ENSG00000114113 | <i>RBP2</i>                | 2.174  | 0.00665 | 0.29219 | 2.322  | 0.00268 | 0.145284 |
| ENSG00000198342 | <i>ZNF442</i>              | -2.589 | 0.00961 | 0.36180 | -2.251 | 0.00268 | 0.145284 |
| ENSG00000140718 | <i>FTO</i>                 | 0.685  | 0.00158 | 0.12306 | 0.648  | 0.00269 | 0.145477 |
| ENSG00000099337 | <i>KCNK6</i>               | -0.699 | 0.00753 | 0.31645 | -0.783 | 0.00273 | 0.147017 |
| ENSG00000071537 | <i>SEL1L</i>               | -0.606 | 0.00378 | 0.21130 | -0.625 | 0.00277 | 0.148583 |
| ENSG00000150457 | <i>LATS2</i>               | -0.612 | 0.00437 | 0.22787 | -0.643 | 0.00278 | 0.148946 |
| ENSG00000164070 | <i>HSPA4L</i>              | -0.594 | 0.00443 | 0.22940 | -0.622 | 0.00280 | 0.149680 |
| ENSG00000109920 | <i>FNBP4</i>               | 0.631  | 0.00252 | 0.16536 | 0.617  | 0.00282 | 0.150823 |
| ENSG00000198590 | <i>C3orf35</i>             | 0.766  | 0.00354 | 0.20172 | 0.772  | 0.00283 | 0.151174 |
| ENSG00000127124 | <i>HIVEP3</i>              | -0.680 | 0.00238 | 0.15961 | -0.666 | 0.00285 | 0.151473 |
| ENSG00000274897 | <i>PANO1</i>               | -1.939 | 0.00285 | 0.17715 | -1.942 | 0.00285 | 0.151473 |
| ENSG00000141579 | <i>ZNF750</i>              | 0.824  | 0.00402 | 0.21889 | 0.850  | 0.00286 | 0.151518 |
| ENSG00000245680 | <i>ZNF585B</i>             | -0.707 | 0.00359 | 0.20368 | -0.708 | 0.00287 | 0.152270 |
| ENSG00000087448 | <i>KLHL42</i>              | -0.606 | 0.00407 | 0.22094 | -0.628 | 0.00288 | 0.152270 |
| ENSG00000153253 | <i>SCN3A</i>               | -0.974 | 0.00303 | 0.18487 | -0.937 | 0.00288 | 0.152270 |
| ENSG00000104325 | <i>DECR1</i>               | -0.646 | 0.00295 | 0.18187 | -0.637 | 0.00288 | 0.152270 |
| ENSG00000128274 | <i>A4GALT</i>              | -0.836 | 0.00266 | 0.17149 | -0.821 | 0.00290 | 0.152993 |
| ENSG00000112514 | <i>CUTA</i>                | 0.630  | 0.00550 | 0.26271 | 0.635  | 0.00293 | 0.153685 |
| ENSG00000065154 | <i>OAT</i>                 | -0.592 | 0.00450 | 0.23155 | -0.618 | 0.00293 | 0.153685 |
| ENSG00000166343 | <i>MSS51</i>               | 0.831  | 0.00304 | 0.18491 | 0.826  | 0.00293 | 0.153685 |
| ENSG00000162344 | <i>FGF19</i>               | 0.671  | 0.00265 | 0.17120 | 0.662  | 0.00293 | 0.153685 |
| ENSG00000170881 | <i>RNF139</i>              | -0.623 | 0.00326 | 0.19347 | -0.629 | 0.00293 | 0.153685 |
| ENSG00000248008 | <i>NRAV</i>                | 0.655  | 0.00422 | 0.22500 | 0.681  | 0.00294 | 0.153955 |
| ENSG00000173083 | <i>HPSE</i>                | 0.688  | 0.00323 | 0.19303 | 0.681  | 0.00295 | 0.154528 |
| ENSG00000136295 | <i>TTYH3</i>               | -0.623 | 0.00411 | 0.22214 | -0.644 | 0.00295 | 0.154550 |
| ENSG00000158186 | <i>MRAS</i>                | -0.617 | 0.00576 | 0.26979 | -0.657 | 0.00296 | 0.154714 |
| ENSG00000063587 | <i>ZNF275</i>              | -0.640 | 0.00290 | 0.17974 | -0.639 | 0.00298 | 0.155561 |
| ENSG00000163482 | <i>STK36</i>               | 0.600  | 0.00486 | 0.24249 | 0.630  | 0.00298 | 0.155640 |
| ENSG00000006747 | <i>SCIN</i>                | 1.447  | 0.00350 | 0.20066 | 1.401  | 0.00300 | 0.156176 |
| ENSG00000112697 | <i>TMEM30A</i>             | -0.612 | 0.00324 | 0.19303 | -0.616 | 0.00301 | 0.156766 |
| ENSG00000161270 | <i>NPHS1</i>               | 0.670  | 0.00532 | 0.25711 | 0.701  | 0.00302 | 0.156880 |
| ENSG00000171227 | <i>TMEM37</i>              | -0.944 | 0.00418 | 0.22398 | -0.977 | 0.00303 | 0.157172 |
| ENSG00000127824 | <i>TUBA4A</i>              | -0.658 | 0.00231 | 0.15638 | -0.639 | 0.00304 | 0.157786 |
| ENSG00000282230 | <i>ADAM9</i>               | -0.689 | 0.00150 | 0.11827 | -0.624 | 0.00304 | 0.157796 |
| ENSG00000164209 | <i>SLC25A46</i>            | -0.623 | 0.00317 | 0.19024 | -0.624 | 0.00306 | 0.158290 |
| ENSG00000138316 | <i>ADAMTS14</i>            | -1.005 | 0.00837 | 0.33478 | -1.090 | 0.00306 | 0.158290 |
| ENSG00000111961 | <i>SASH1</i>               | -0.642 | 0.00390 | 0.21527 | -0.652 | 0.00306 | 0.158290 |

|                 |                     |        |         |         |        |         |          |
|-----------------|---------------------|--------|---------|---------|--------|---------|----------|
| ENSG00000145569 | <i>OTULINL</i>      | -0.741 | 0.00350 | 0.20066 | -0.739 | 0.00306 | 0.158290 |
| ENSG00000107984 | <i>DKK1</i>         | -0.609 | 0.00309 | 0.18676 | -0.609 | 0.00307 | 0.158590 |
| ENSG00000147526 | <i>TACC1</i>        | -0.609 | 0.00353 | 0.20123 | -0.617 | 0.00308 | 0.158957 |
| ENSG00000155893 | <i>PXYLP1</i>       | -0.666 | 0.00284 | 0.17715 | -0.658 | 0.00309 | 0.159025 |
| ENSG00000156256 | <i>USP16</i>        | -0.578 | 0.00606 | 0.27808 | -0.620 | 0.00311 | 0.160116 |
| ENSG00000160058 | <i>BSDC1</i>        | 0.660  | 0.00187 | 0.13728 | 0.623  | 0.00311 | 0.160116 |
| ENSG00000094631 | <i>HDAC6</i>        | 0.631  | 0.00275 | 0.17464 | 0.620  | 0.00313 | 0.160504 |
| ENSG00000138772 | <i>ANXA3</i>        | -0.605 | 0.00374 | 0.20995 | -0.613 | 0.00313 | 0.160504 |
| ENSG00000169255 | <i>B3GALNT1</i>     | -0.687 | 0.00186 | 0.13678 | -0.648 | 0.00313 | 0.160504 |
| ENSG00000206384 | <i>COL6A6</i>       | 0.931  | 0.00482 | 0.24130 | 0.973  | 0.00314 | 0.160642 |
| ENSG00000275342 | <i>PRAG1</i>        | -0.631 | 0.00340 | 0.19781 | -0.621 | 0.00314 | 0.160642 |
| ENSG00000090776 | <i>EFNB1</i>        | -0.666 | 0.00323 | 0.19303 | -0.661 | 0.00314 | 0.160642 |
| ENSG00000197956 | <i>S100A6</i>       | 0.599  | 0.00366 | 0.20625 | 0.608  | 0.00316 | 0.161168 |
| ENSG00000169946 | <i>ZFPM2</i>        | 0.708  | 0.00238 | 0.15961 | 0.683  | 0.00321 | 0.163316 |
| ENSG00000148925 | <i>BTBD10</i>       | -0.668 | 0.00394 | 0.21680 | -0.670 | 0.00325 | 0.164562 |
| ENSG00000076706 | <i>MCAM</i>         | -0.619 | 0.00568 | 0.26897 | -0.650 | 0.00325 | 0.164562 |
| ENSG00000117266 | <i>CDK18</i>        | -0.692 | 0.00584 | 0.27189 | -0.722 | 0.00327 | 0.164562 |
| ENSG00000151718 | <i>WWC2</i>         | -0.604 | 0.00409 | 0.22137 | -0.615 | 0.00331 | 0.166246 |
| ENSG00000055163 | <i>CYFIP2</i>       | -0.688 | 0.00428 | 0.22621 | -0.689 | 0.00333 | 0.167362 |
| ENSG00000152767 | <i>FARP1</i>        | -0.594 | 0.00507 | 0.24896 | -0.620 | 0.00337 | 0.168981 |
| ENSG00000150782 | <i>IL18</i>         | 1.836  | 0.00031 | 0.04005 | 1.306  | 0.00338 | 0.168981 |
| ENSG00000183161 | <i>FANCF</i>        | -1.302 | 0.00109 | 0.09927 | -1.130 | 0.00338 | 0.168981 |
| ENSG00000282556 | <i>LOC101927825</i> | 6.734  | 0.00035 | 0.04482 | 2.866  | 0.00339 | 0.168981 |
| ENSG00000188886 | <i>ASTL</i>         | 3.343  | 0.00788 | 0.32074 | 2.866  | 0.00339 | 0.168981 |
| ENSG00000207780 | <i>MIR648</i>       | 2.665  | 0.00961 | 0.36180 | 2.866  | 0.00339 | 0.168981 |
| ENSG00000104219 | <i>ZDHHC2</i>       | -0.632 | 0.00394 | 0.21680 | -0.634 | 0.00340 | 0.168981 |
| ENSG00000170381 | <i>SEMA3E</i>       | -1.007 | 0.00304 | 0.18509 | -0.948 | 0.00341 | 0.169478 |
| ENSG00000110799 | <i>VWF</i>          | 1.539  | 0.00298 | 0.18310 | 1.195  | 0.00342 | 0.169633 |
| ENSG00000234840 | <i>LINC01239</i>    | 1.227  | 0.00481 | 0.24098 | 1.195  | 0.00342 | 0.169633 |
| ENSG00000038210 | <i>PI4K2B</i>       | -0.635 | 0.00376 | 0.21028 | -0.640 | 0.00342 | 0.169633 |
| ENSG00000153064 | <i>BANK1</i>        | -0.864 | 0.00689 | 0.30046 | -0.875 | 0.00344 | 0.169934 |
| ENSG00000055208 | <i>TAB2</i>         | 0.612  | 0.00337 | 0.19758 | 0.610  | 0.00344 | 0.170140 |
| ENSG00000142089 | <i>IFITM3</i>       | -0.642 | 0.00311 | 0.18771 | -0.629 | 0.00345 | 0.170140 |
| ENSG00000171992 | <i>SYNPO</i>        | -1.016 | 0.00513 | 0.25083 | -1.056 | 0.00352 | 0.173318 |
| ENSG00000169504 | <i>CLIC4</i>        | -0.635 | 0.00349 | 0.20066 | -0.631 | 0.00353 | 0.173449 |
| ENSG00000275246 | <i>TLCD2</i>        | -0.909 | 0.00363 | 0.20520 | -0.776 | 0.00356 | 0.175153 |
| ENSG00000078687 | <i>TNRC6C</i>       | -0.612 | 0.00375 | 0.21028 | -0.613 | 0.00357 | 0.175374 |
| ENSG00000240498 | <i>CDKN2B-AS1</i>   | 0.702  | 0.00326 | 0.19347 | 0.689  | 0.00357 | 0.175374 |
| ENSG00000196116 | <i>TDRD7</i>        | -0.679 | 0.00491 | 0.24434 | -0.683 | 0.00359 | 0.176166 |
| ENSG00000160285 | <i>LSS</i>          | 0.600  | 0.00520 | 0.25302 | 0.610  | 0.00360 | 0.176657 |
| ENSG00000152642 | <i>GPD1L</i>        | -0.632 | 0.00349 | 0.20066 | -0.629 | 0.00362 | 0.177044 |
| ENSG00000149260 | <i>CAPN5</i>        | -0.721 | 0.00570 | 0.26897 | -0.740 | 0.00364 | 0.177544 |
| ENSG00000164125 | <i>GASK1B</i>       | -0.786 | 0.00971 | 0.36368 | -0.874 | 0.00364 | 0.177796 |
| ENSG00000151208 | <i>DLG5</i>         | -0.570 | 0.00777 | 0.32074 | -0.607 | 0.00365 | 0.177796 |
| ENSG00000088340 | <i>FER1L4</i>       | 0.769  | 0.00308 | 0.18660 | 0.739  | 0.00365 | 0.177796 |
| ENSG00000120738 | <i>EGR1</i>         | -0.596 | 0.00422 | 0.22500 | -0.605 | 0.00366 | 0.178112 |
| ENSG00000123685 | <i>BATF3</i>        | -0.816 | 0.00496 | 0.24619 | -0.813 | 0.00369 | 0.179327 |
| ENSG00000149823 | <i>VPS51</i>        | -0.617 | 0.00378 | 0.21130 | -0.615 | 0.00371 | 0.180085 |
| ENSG00000104369 | <i>JPH1</i>         | -0.614 | 0.00433 | 0.22662 | -0.622 | 0.00374 | 0.181036 |
| ENSG00000137563 | <i>GGH</i>          | -0.608 | 0.00446 | 0.22991 | -0.612 | 0.00374 | 0.181036 |
| ENSG00000137860 | <i>SLC28A2</i>      | 0.792  | 0.00267 | 0.17166 | 0.755  | 0.00375 | 0.181329 |
| ENSG00000183840 | <i>GPR39</i>        | 0.940  | 0.00255 | 0.16658 | 0.893  | 0.00376 | 0.181645 |
| ENSG00000091409 | <i>ITGA6</i>        | -0.582 | 0.00502 | 0.24792 | -0.599 | 0.00377 | 0.182137 |
| ENSG00000232656 | <i>IDI2-AS1</i>     | 1.500  | 0.00408 | 0.22120 | 1.468  | 0.00378 | 0.182144 |
| ENSG00000163884 | <i>KLF15</i>        | -1.942 | 0.00128 | 0.10751 | -1.639 | 0.00382 | 0.183444 |
| ENSG00000228290 | <i>TBX18-AS1</i>    | 1.713  | 0.00382 | 0.21185 | 1.710  | 0.00382 | 0.183444 |

|                 |                    |        |         |         |        |         |          |
|-----------------|--------------------|--------|---------|---------|--------|---------|----------|
| ENSG00000126861 | <i>OMG</i>         | 0.780  | 0.00263 | 0.17036 | 0.745  | 0.00383 | 0.183651 |
| ENSG00000121101 | <i>TEX14</i>       | 0.861  | 0.00085 | 0.08447 | 0.705  | 0.00385 | 0.184347 |
| ENSG00000074211 | <i>PPP2R2C</i>     | -0.601 | 0.00646 | 0.28959 | -0.634 | 0.00386 | 0.184745 |
| ENSG00000222047 | <i>C10orf55</i>    | 1.183  | 0.00270 | 0.17191 | 1.129  | 0.00389 | 0.185616 |
| ENSG00000106688 | <i>SLC1A1</i>      | -0.749 | 0.00989 | 0.36766 | -0.801 | 0.00394 | 0.187234 |
| ENSG00000111700 | <i>SLCO1B3</i>     | -0.740 | 0.00339 | 0.19758 | -0.730 | 0.00394 | 0.187234 |
| ENSG00000167535 | <i>CACNB3</i>      | -0.653 | 0.00559 | 0.26642 | -0.668 | 0.00394 | 0.187234 |
| ENSG00000204334 | <i>ERICH2</i>      | -1.421 | 0.00169 | 0.12871 | -1.044 | 0.00395 | 0.187234 |
| ENSG00000137193 | <i>PIM1</i>        | 0.643  | 0.00575 | 0.26979 | 0.665  | 0.00396 | 0.187604 |
| ENSG00000280852 | <i>LOC653653</i>   | -0.741 | 0.00525 | 0.25516 | -0.726 | 0.00396 | 0.187604 |
| ENSG00000049130 | <i>KITLG</i>       | -0.602 | 0.00351 | 0.20070 | -0.593 | 0.00399 | 0.188651 |
| ENSG00000281026 | <i>N4BP2L2-IT2</i> | 0.620  | 0.00521 | 0.25319 | 0.640  | 0.00401 | 0.188923 |
| ENSG00000127954 | <i>STEAP4</i>      | 1.737  | 0.00904 | 0.34944 | 1.775  | 0.00402 | 0.188923 |
| ENSG00000164465 | <i>DCBLD1</i>      | -0.634 | 0.00401 | 0.21883 | -0.625 | 0.00407 | 0.190452 |
| ENSG00000196967 | <i>ZNF585A</i>     | -0.704 | 0.00476 | 0.23892 | -0.688 | 0.00408 | 0.190801 |
| ENSG00000181826 | <i>RELL1</i>       | -0.699 | 0.00332 | 0.19587 | -0.670 | 0.00409 | 0.191032 |
| ENSG00000204335 | <i>SP5</i>         | -0.769 | 0.00495 | 0.24574 | -0.771 | 0.00410 | 0.191346 |
| ENSG00000174791 | <i>RIN1</i>        | -0.641 | 0.00404 | 0.21953 | -0.636 | 0.00413 | 0.192461 |
| ENSG00000137834 | <i>SMAD6</i>       | 0.894  | 0.00164 | 0.12623 | 0.805  | 0.00414 | 0.192747 |
| ENSG00000132155 | <i>RAF1</i>        | -0.560 | 0.00745 | 0.31498 | -0.598 | 0.00416 | 0.193617 |
| ENSG00000203896 | <i>LIME1</i>       | 0.936  | 0.00191 | 0.13772 | 0.869  | 0.00416 | 0.193617 |
| ENSG00000169860 | <i>P2RY1</i>       | -1.779 | 0.00418 | 0.22398 | -1.782 | 0.00418 | 0.194201 |
| ENSG00000147130 | <i>ZMYM3</i>       | -0.612 | 0.00389 | 0.21504 | -0.604 | 0.00420 | 0.194613 |
| ENSG00000263247 | <i>PRH1</i>        | 0.920  | 0.00167 | 0.12813 | 0.681  | 0.00420 | 0.194751 |
| ENSG00000100652 | <i>SLC10A1</i>     | 0.724  | 0.00471 | 0.23719 | 0.730  | 0.00421 | 0.194840 |
| ENSG00000075618 | <i>FSCN1</i>       | -0.574 | 0.00543 | 0.26079 | -0.590 | 0.00422 | 0.194986 |
| ENSG00000162430 | <i>SELENON</i>     | -0.602 | 0.00428 | 0.22603 | -0.602 | 0.00425 | 0.195966 |
| ENSG00000236756 | <i>DNAJC9-AS1</i>  | 0.959  | 0.00672 | 0.29459 | 0.996  | 0.00425 | 0.195966 |
| ENSG00000173531 | <i>MST1</i>        | 0.829  | 0.00072 | 0.07609 | 0.661  | 0.00428 | 0.196724 |
| ENSG00000275491 | <i>LINC01730</i>   | 1.458  | 0.00180 | 0.13422 | 1.387  | 0.00432 | 0.197993 |
| ENSG00000125841 | <i>NRSN2</i>       | 2.012  | 0.00663 | 0.29219 | 2.079  | 0.00433 | 0.197993 |
| ENSG00000163485 | <i>ADORA1</i>      | -0.901 | 0.00583 | 0.27144 | -0.921 | 0.00434 | 0.198639 |
| ENSG00000196208 | <i>GREB1</i>       | -0.647 | 0.00288 | 0.17849 | -0.616 | 0.00437 | 0.199619 |
| ENSG00000244161 | <i>FLNB-AS1</i>    | 0.746  | 0.00499 | 0.24687 | 0.758  | 0.00438 | 0.199782 |
| ENSG00000118997 | <i>DNAH7</i>       | 1.523  | 0.00661 | 0.29219 | 1.529  | 0.00440 | 0.200777 |
| ENSG00000100439 | <i>ABHD4</i>       | 0.632  | 0.00543 | 0.26079 | 0.645  | 0.00441 | 0.200777 |
| ENSG00000214694 | <i>ARHGEF33</i>    | 1.197  | 0.00619 | 0.28240 | 1.216  | 0.00441 | 0.200777 |
| ENSG00000075290 | <i>WNT8B</i>       | 0.833  | 0.00577 | 0.27004 | 0.866  | 0.00442 | 0.200785 |
| ENSG00000054598 | <i>FOXC1</i>       | -0.664 | 0.00515 | 0.25165 | -0.677 | 0.00443 | 0.200785 |
| ENSG00000134970 | <i>TMED7</i>       | -0.589 | 0.00492 | 0.24468 | -0.596 | 0.00443 | 0.200785 |
| ENSG00000175029 | <i>CTBP2</i>       | -0.560 | 0.00757 | 0.31707 | -0.594 | 0.00443 | 0.200785 |
| ENSG00000183876 | <i>ARSI</i>        | -3.393 | 0.00444 | 0.22940 | -3.396 | 0.00444 | 0.200785 |
| ENSG00000046653 | <i>GPM6B</i>       | 0.715  | 0.00620 | 0.28240 | 0.739  | 0.00445 | 0.200957 |
| ENSG00000266265 | <i>KLF14</i>       | -0.913 | 0.00620 | 0.28240 | -0.947 | 0.00449 | 0.202524 |
| ENSG00000122884 | <i>P4HA1</i>       | -0.592 | 0.00539 | 0.25960 | -0.600 | 0.00449 | 0.202542 |
| ENSG00000174938 | <i>SEZ6L2</i>      | -0.608 | 0.00572 | 0.26897 | -0.618 | 0.00450 | 0.202915 |
| ENSG00000225828 | <i>FAM229A</i>     | 0.877  | 0.00223 | 0.15327 | 0.807  | 0.00453 | 0.203774 |
| ENSG00000183283 | <i>DAZAP2</i>      | -0.609 | 0.00361 | 0.20415 | -0.592 | 0.00456 | 0.204702 |
| ENSG00000157510 | <i>AFAP1L1</i>     | -0.677 | 0.00821 | 0.33009 | -0.711 | 0.00458 | 0.205191 |
| ENSG00000171016 | <i>PYGO1</i>       | -0.771 | 0.00436 | 0.22764 | -0.758 | 0.00458 | 0.205191 |
| ENSG00000125462 | <i>C1orf61</i>     | 0.607  | 0.00431 | 0.22662 | 0.603  | 0.00459 | 0.205191 |
| ENSG00000158423 | <i>RIBC1</i>       | 1.173  | 0.00433 | 0.22662 | 1.135  | 0.00460 | 0.205191 |
| ENSG00000144647 | <i>POMGNT2</i>     | -0.611 | 0.00518 | 0.25252 | -0.618 | 0.00460 | 0.205191 |
| ENSG00000136944 | <i>LMX1B</i>       | -0.682 | 0.00244 | 0.16101 | -0.633 | 0.00462 | 0.205191 |
| ENSG00000184208 | <i>C22orf46</i>    | 0.646  | 0.00327 | 0.19347 | 0.623  | 0.00463 | 0.205191 |
| ENSG00000167702 | <i>KIFC2</i>       | 0.718  | 0.00123 | 0.10669 | 0.623  | 0.00463 | 0.205191 |

|                 |                     |        |         |         |        |         |          |
|-----------------|---------------------|--------|---------|---------|--------|---------|----------|
| ENSG00000162433 | <i>AK4</i>          | -0.572 | 0.00673 | 0.29477 | -0.591 | 0.00463 | 0.205191 |
| ENSG00000251143 | <i>LOC100128494</i> | 1.082  | 0.00505 | 0.24850 | 1.077  | 0.00464 | 0.205191 |
| ENSG00000184502 | <i>GAST</i>         | 6.209  | 0.00464 | 0.23500 | 6.208  | 0.00464 | 0.205191 |
| ENSG00000198807 | <i>PAX9</i>         | -0.652 | 0.00731 | 0.31120 | -0.684 | 0.00465 | 0.205249 |
| ENSG00000124615 | <i>MOCS1</i>        | -0.737 | 0.00572 | 0.26897 | -0.731 | 0.00469 | 0.206972 |
| ENSG00000143515 | <i>ATP8B2</i>       | -0.603 | 0.00531 | 0.25687 | -0.606 | 0.00470 | 0.207240 |
| ENSG00000161011 | <i>SQSTM1</i>       | 0.603  | 0.00384 | 0.21292 | 0.583  | 0.00470 | 0.207240 |
| ENSG00000129355 | <i>CDKN2D</i>       | 0.700  | 0.00660 | 0.29219 | 0.717  | 0.00473 | 0.207593 |
| ENSG00000149948 | <i>HMGA2</i>        | -0.562 | 0.00657 | 0.29219 | -0.584 | 0.00473 | 0.207593 |
| ENSG00000229544 | <i>NKX1-2</i>       | -1.491 | 0.00474 | 0.23844 | -1.494 | 0.00474 | 0.208112 |
| ENSG00000040608 | <i>RTN4R</i>        | -0.697 | 0.00424 | 0.22510 | -0.690 | 0.00477 | 0.209325 |
| ENSG00000168118 | <i>RAB4A</i>        | -0.554 | 0.00965 | 0.36222 | -0.598 | 0.00480 | 0.210151 |
| ENSG00000146592 | <i>CREB5</i>        | 1.425  | 0.00242 | 0.16037 | 1.320  | 0.00482 | 0.210740 |
| ENSG00000153006 | <i>SREK1IP1</i>     | -0.636 | 0.00316 | 0.18961 | -0.603 | 0.00487 | 0.212716 |
| ENSG00000173065 | <i>FAM22B</i>       | -0.607 | 0.00543 | 0.26079 | -0.613 | 0.00488 | 0.212716 |
| ENSG00000122068 | <i>FYTTD1</i>       | -0.595 | 0.00416 | 0.22368 | -0.584 | 0.00489 | 0.213081 |
| ENSG00000004848 | <i>ARX</i>          | -0.987 | 0.00226 | 0.15451 | -0.876 | 0.00491 | 0.213644 |
| ENSG00000146197 | <i>SCUBE3</i>       | 0.668  | 0.00359 | 0.20368 | 0.648  | 0.00493 | 0.213932 |
| ENSG00000183873 | <i>SCN5A</i>        | -0.641 | 0.00575 | 0.26979 | -0.644 | 0.00493 | 0.213932 |
| ENSG00000112972 | <i>HMGCS1</i>       | 0.584  | 0.00461 | 0.23500 | 0.579  | 0.00493 | 0.213932 |
| ENSG00000105810 | <i>CDK6</i>         | -0.579 | 0.00506 | 0.24896 | -0.580 | 0.00494 | 0.214423 |
| ENSG00000170500 | <i>LONRF2</i>       | 0.996  | 0.00541 | 0.26048 | 0.994  | 0.00499 | 0.216106 |
| ENSG00000136908 | <i>DPM2</i>         | 0.636  | 0.00351 | 0.20072 | 0.608  | 0.00499 | 0.216122 |
| ENSG00000164402 | <i>SEPTIN8</i>      | -0.584 | 0.00637 | 0.28745 | -0.597 | 0.00503 | 0.217324 |
| ENSG00000121552 | <i>CSTA</i>         | -0.826 | 0.00312 | 0.18780 | -0.746 | 0.00503 | 0.217324 |
| ENSG00000240204 | <i>SMKR1</i>        | -1.202 | 0.00184 | 0.13559 | -1.051 | 0.00505 | 0.217605 |
| ENSG00000148200 | <i>NR6A1</i>        | 0.652  | 0.00359 | 0.20368 | 0.624  | 0.00506 | 0.217881 |
| ENSG00000189334 | <i>S100A14</i>      | 0.593  | 0.00599 | 0.27617 | 0.602  | 0.00507 | 0.218219 |
| ENSG00000077800 | <i>FKBP6</i>        | 1.132  | 0.00389 | 0.21504 | 0.794  | 0.00508 | 0.218219 |
| ENSG00000277150 | <i>F8A3</i>         | -1.094 | 0.00690 | 0.30055 | -0.791 | 0.00508 | 0.218219 |
| ENSG00000175643 | <i>RMI2</i>         | -0.664 | 0.00811 | 0.32687 | -0.697 | 0.00508 | 0.218219 |
| ENSG00000123933 | <i>MXD4</i>         | -0.606 | 0.00722 | 0.30863 | -0.627 | 0.00510 | 0.218413 |
| ENSG00000262185 | <i>LINC02861</i>    | -1.590 | 0.00841 | 0.33546 | -1.537 | 0.00510 | 0.218413 |
| ENSG00000163395 | <i>IGFN1</i>        | 1.737  | 0.00904 | 0.34944 | 1.609  | 0.00510 | 0.218413 |
| ENSG00000179361 | <i>ARID3B</i>       | 0.648  | 0.00353 | 0.20104 | 0.610  | 0.00521 | 0.222643 |
| ENSG00000125398 | <i>SOX9</i>         | -0.594 | 0.00542 | 0.26071 | -0.596 | 0.00522 | 0.222796 |
| ENSG00000140848 | <i>CPNE2</i>        | -0.589 | 0.00767 | 0.31924 | -0.605 | 0.00522 | 0.222815 |
| ENSG00000198794 | <i>SCAMP5</i>       | -0.733 | 0.00419 | 0.22398 | -0.704 | 0.00526 | 0.224089 |
| ENSG00000142347 | <i>MYO1F</i>        | 1.024  | 0.00139 | 0.11326 | 0.865  | 0.00529 | 0.225027 |
| ENSG00000103642 | <i>LACTB</i>        | -0.635 | 0.00741 | 0.31439 | -0.652 | 0.00532 | 0.225859 |
| ENSG00000160753 | <i>RUSC1</i>        | 0.577  | 0.00725 | 0.30934 | 0.594  | 0.00539 | 0.228445 |
| ENSG00000197632 | <i>SERPINB2</i>     | -1.533 | 0.00779 | 0.32074 | -1.588 | 0.00546 | 0.230643 |
| ENSG00000154479 | <i>CCDC173</i>      | 0.936  | 0.00883 | 0.34694 | 0.935  | 0.00549 | 0.231184 |
| ENSG00000280351 | <i>LOC100129503</i> | 0.877  | 0.00324 | 0.19303 | 0.817  | 0.00551 | 0.231779 |
| ENSG00000184900 | <i>SUMO3</i>        | -0.591 | 0.00597 | 0.27608 | -0.594 | 0.00554 | 0.232669 |
| ENSG00000176473 | <i>WDR25</i>        | 0.663  | 0.00897 | 0.34811 | 0.694  | 0.00560 | 0.234869 |
| ENSG00000126091 | <i>ST3GAL3</i>      | 0.692  | 0.00415 | 0.22368 | 0.666  | 0.00560 | 0.234869 |
| ENSG00000161912 | <i>ADCY10P1</i>     | 0.927  | 0.00398 | 0.21800 | 0.869  | 0.00560 | 0.234869 |
| ENSG00000197385 | <i>ZNF860</i>       | -0.673 | 0.00746 | 0.31508 | -0.693 | 0.00563 | 0.235709 |
| ENSG00000168263 | <i>KCNV2</i>        | 0.849  | 0.00696 | 0.30136 | 0.862  | 0.00565 | 0.236157 |
| ENSG00000136111 | <i>TBC1D4</i>       | -0.590 | 0.00490 | 0.24380 | -0.579 | 0.00565 | 0.236157 |
| ENSG00000226180 | <i>LOC100129215</i> | 0.701  | 0.00634 | 0.28677 | 0.705  | 0.00566 | 0.236473 |
| ENSG00000165801 | <i>ARHGEF40</i>     | -0.769 | 0.00456 | 0.23309 | -0.734 | 0.00571 | 0.237568 |
| ENSG00000277897 | <i>GSTT2</i>        | -1.293 | 0.00526 | 0.25533 | -0.736 | 0.00572 | 0.237568 |
| ENSG00000019549 | <i>SNAI2</i>        | 0.648  | 0.00465 | 0.23504 | 0.627  | 0.00573 | 0.237568 |
| ENSG00000125637 | <i>PSD4</i>         | -0.692 | 0.00451 | 0.23192 | -0.662 | 0.00575 | 0.237828 |

|                 |                   |        |         |         |        |         |          |
|-----------------|-------------------|--------|---------|---------|--------|---------|----------|
| ENSG00000232684 | <i>ATP11A-AS1</i> | 1.088  | 0.00719 | 0.30778 | 1.110  | 0.00575 | 0.237828 |
| ENSG00000124225 | <i>PMEPA1</i>     | 1.063  | 0.00987 | 0.36710 | 1.110  | 0.00575 | 0.237828 |
| ENSG00000145703 | <i>IQGAP2</i>     | -1.355 | 0.00512 | 0.25059 | -1.203 | 0.00576 | 0.237828 |
| ENSG00000159588 | <i>CCDC17</i>     | 0.864  | 0.00437 | 0.22793 | 0.842  | 0.00577 | 0.238065 |
| ENSG00000136193 | <i>SCRN1</i>      | -0.571 | 0.00582 | 0.27144 | -0.571 | 0.00583 | 0.239701 |
| ENSG00000125351 | <i>UPF3B</i>      | 0.585  | 0.00611 | 0.27996 | 0.584  | 0.00588 | 0.241575 |
| ENSG00000130956 | <i>HABP4</i>      | 0.675  | 0.00395 | 0.21680 | 0.630  | 0.00589 | 0.241657 |
| ENSG00000197702 | <i>PARVA</i>      | -0.567 | 0.00744 | 0.31468 | -0.580 | 0.00592 | 0.242255 |
| ENSG00000131773 | <i>KHDRBS3</i>    | -0.596 | 0.00922 | 0.35316 | -0.616 | 0.00593 | 0.242390 |
| ENSG00000172139 | <i>SLC9C1</i>     | 1.037  | 0.00291 | 0.17999 | 0.793  | 0.00594 | 0.242507 |
| ENSG00000149212 | <i>SESN3</i>      | -0.917 | 0.00465 | 0.23504 | -0.882 | 0.00595 | 0.242643 |
| ENSG00000162976 | <i>SLC66A3</i>    | -0.726 | 0.00753 | 0.31645 | -0.735 | 0.00596 | 0.243117 |
| ENSG00000153814 | <i>JAZF1</i>      | -0.790 | 0.00380 | 0.21185 | -0.743 | 0.00599 | 0.243893 |
| ENSG00000050438 | <i>SLC4A8</i>     | -0.928 | 0.00568 | 0.26897 | -0.871 | 0.00600 | 0.243893 |
| ENSG00000115257 | <i>PCSK4</i>      | 0.830  | 0.00992 | 0.36824 | 0.866  | 0.00600 | 0.243893 |
| ENSG00000180638 | <i>SLC47A2</i>    | 1.061  | 0.00743 | 0.31468 | 1.082  | 0.00600 | 0.243893 |
| ENSG00000088538 | <i>DOCK3</i>      | 0.590  | 0.00784 | 0.32074 | 0.599  | 0.00608 | 0.246737 |
| ENSG00000104765 | <i>BNIP3L</i>     | -0.625 | 0.00494 | 0.24554 | -0.606 | 0.00610 | 0.247359 |
| ENSG00000162852 | <i>CNST</i>       | -0.624 | 0.00369 | 0.20771 | -0.585 | 0.00610 | 0.247359 |
| ENSG00000152402 | <i>GUCY1A2</i>    | 1.737  | 0.00904 | 0.34944 | 1.795  | 0.00616 | 0.248866 |
| ENSG00000186907 | <i>RTN4RL2</i>    | -0.665 | 0.00865 | 0.34115 | -0.683 | 0.00621 | 0.250254 |
| ENSG00000197147 | <i>LRRC8B</i>     | -0.574 | 0.00651 | 0.29054 | -0.577 | 0.00623 | 0.250676 |
| ENSG00000122707 | <i>RECK</i>       | -0.725 | 0.00805 | 0.32553 | -0.729 | 0.00623 | 0.250676 |
| ENSG00000169372 | <i>CRADD</i>      | -0.720 | 0.00439 | 0.22844 | -0.686 | 0.00624 | 0.250689 |
| ENSG00000260630 | <i>SNAI3-AS1</i>  | 0.725  | 0.00758 | 0.31707 | 0.727  | 0.00624 | 0.250689 |
| ENSG00000101577 | <i>LPIN2</i>      | -0.585 | 0.00712 | 0.30639 | -0.592 | 0.00626 | 0.250871 |
| ENSG00000139192 | <i>TAPBPL</i>     | 0.797  | 0.00664 | 0.29219 | 0.797  | 0.00626 | 0.250871 |
| ENSG00000100156 | <i>SLC16A8</i>    | 0.778  | 0.00517 | 0.25191 | 0.751  | 0.00628 | 0.251187 |
| ENSG00000134940 | <i>ACRV1</i>      | 0.772  | 0.00789 | 0.32088 | 0.789  | 0.00628 | 0.251187 |
| ENSG00000165072 | <i>MAMDC2</i>     | 1.394  | 0.00692 | 0.30066 | 1.370  | 0.00631 | 0.251405 |
| ENSG00000184933 | <i>OR6A2</i>      | 1.335  | 0.00843 | 0.33584 | 1.370  | 0.00631 | 0.251405 |
| ENSG00000185758 | <i>CLDN24</i>     | -1.731 | 0.00185 | 0.13613 | -1.215 | 0.00632 | 0.251485 |
| ENSG00000142765 | <i>SYTL1</i>      | 0.647  | 0.00464 | 0.23500 | 0.615  | 0.00633 | 0.251566 |
| ENSG00000148468 | <i>FAM171A1</i>   | -0.578 | 0.00615 | 0.28171 | -0.574 | 0.00638 | 0.252441 |
| ENSG00000130479 | <i>MAP1S</i>      | -0.596 | 0.00528 | 0.25582 | -0.581 | 0.00639 | 0.252441 |
| ENSG00000162621 | <i>LRRC53</i>     | 2.406  | 0.00639 | 0.28745 | 2.403  | 0.00639 | 0.252441 |
| ENSG00000263597 | <i>MIR3936</i>    | 2.406  | 0.00639 | 0.28745 | 2.403  | 0.00639 | 0.252441 |
| ENSG00000248485 | <i>PCP4L1</i>     | 2.406  | 0.00639 | 0.28745 | 2.403  | 0.00639 | 0.252441 |
| ENSG00000197774 | <i>EME2</i>       | 0.604  | 0.00497 | 0.24639 | 0.586  | 0.00643 | 0.253546 |
| ENSG00000095585 | <i>BLNK</i>       | 1.825  | 0.00963 | 0.36180 | 1.889  | 0.00644 | 0.253546 |
| ENSG00000214900 | <i>LINC01588</i>  | 0.888  | 0.00333 | 0.19615 | 0.819  | 0.00661 | 0.257459 |
| ENSG00000171488 | <i>LRRC8C</i>     | -0.575 | 0.00763 | 0.31825 | -0.584 | 0.00662 | 0.257459 |
| ENSG00000122861 | <i>PLAU</i>       | 0.562  | 0.00667 | 0.29300 | 0.562  | 0.00663 | 0.257459 |
| ENSG00000235849 | <i>HS6ST2-AS1</i> | 2.174  | 0.00665 | 0.29219 | 2.171  | 0.00665 | 0.257459 |
| ENSG00000171867 | <i>PRNP</i>       | -0.572 | 0.00613 | 0.28069 | -0.566 | 0.00667 | 0.257712 |
| ENSG00000172380 | <i>GNG12</i>      | -0.553 | 0.00797 | 0.32284 | -0.565 | 0.00668 | 0.258009 |
| ENSG00000171130 | <i>ATP6V0E2</i>   | -0.588 | 0.00979 | 0.36509 | -0.612 | 0.00668 | 0.258009 |
| ENSG00000131620 | <i>ANO1</i>       | -0.644 | 0.00441 | 0.22866 | -0.601 | 0.00670 | 0.258446 |
| ENSG00000124787 | <i>RPP40</i>      | -0.665 | 0.00403 | 0.21928 | -0.610 | 0.00673 | 0.259560 |
| ENSG00000196739 | <i>COL27A1</i>    | -0.696 | 0.00244 | 0.16126 | -0.607 | 0.00675 | 0.259926 |
| ENSG00000118600 | <i>RXYLT1</i>     | -0.589 | 0.00730 | 0.31104 | -0.589 | 0.00679 | 0.261152 |
| ENSG00000130702 | <i>LAMA5</i>      | 0.557  | 0.00716 | 0.30721 | 0.559  | 0.00682 | 0.261777 |
| ENSG00000119514 | <i>GALNT12</i>    | -0.739 | 0.00432 | 0.22662 | -0.676 | 0.00688 | 0.263889 |
| ENSG00000100030 | <i>MAPK1</i>      | -0.549 | 0.00799 | 0.32317 | -0.559 | 0.00691 | 0.264027 |
| ENSG00000128591 | <i>FLNC</i>       | -1.578 | 0.00242 | 0.16037 | -1.319 | 0.00692 | 0.264027 |
| ENSG00000184261 | <i>KCNK12</i>     | 1.394  | 0.00692 | 0.30066 | 1.391  | 0.00692 | 0.264027 |



|                 |                     |        |         |         |        |         |          |
|-----------------|---------------------|--------|---------|---------|--------|---------|----------|
| ENSG00000108551 | <i>RASD1</i>        | 1.394  | 0.00692 | 0.30066 | 1.391  | 0.00692 | 0.264027 |
| ENSG00000184465 | <i>WDR27</i>        | 0.564  | 0.00779 | 0.32074 | 0.571  | 0.00693 | 0.264209 |
| ENSG00000181444 | <i>ZNF467</i>       | -1.276 | 0.00576 | 0.26979 | -1.228 | 0.00694 | 0.264238 |
| ENSG00000183255 | <i>PTTG1IP</i>      | -0.574 | 0.00596 | 0.27577 | -0.563 | 0.00696 | 0.264280 |
| ENSG00000103995 | <i>CEP152</i>       | 0.601  | 0.00417 | 0.22398 | 0.564  | 0.00697 | 0.264280 |
| ENSG0000016082  | <i>ISL1</i>         | -0.826 | 0.00359 | 0.20368 | -0.751 | 0.00698 | 0.264280 |
| ENSG00000155099 | <i>PIP4P2</i>       | -0.662 | 0.00634 | 0.28677 | -0.646 | 0.00699 | 0.264280 |
| ENSG00000113396 | <i>SLC27A6</i>      | -0.644 | 0.00594 | 0.27560 | -0.622 | 0.00704 | 0.265464 |
| ENSG00000145391 | <i>SETD7</i>        | -0.550 | 0.00787 | 0.32074 | -0.557 | 0.00705 | 0.265569 |
| ENSG00000102393 | <i>GLA</i>          | 0.577  | 0.00760 | 0.31722 | 0.579  | 0.00706 | 0.265858 |
| ENSG00000152078 | <i>TLCD4</i>        | -0.593 | 0.00716 | 0.30721 | -0.592 | 0.00711 | 0.266580 |
| ENSG00000250365 | <i>LOC101927124</i> | 0.970  | 0.00419 | 0.22398 | 0.903  | 0.00714 | 0.266580 |
| ENSG00000089693 | <i>MLF2</i>         | -0.552 | 0.00795 | 0.32260 | -0.558 | 0.00715 | 0.266580 |
| ENSG00000151612 | <i>ZNF827</i>       | -0.552 | 0.00935 | 0.35691 | -0.570 | 0.00715 | 0.266580 |
| ENSG00000141458 | <i>NPC1</i>         | 0.549  | 0.00900 | 0.34857 | 0.563  | 0.00715 | 0.266580 |
| ENSG00000176845 | <i>METRNL</i>       | -0.677 | 0.00434 | 0.22662 | -0.590 | 0.00716 | 0.266580 |
| ENSG00000165197 | <i>VEGFD</i>        | 1.913  | 0.00283 | 0.17677 | 1.560  | 0.00718 | 0.266580 |
| ENSG00000091879 | <i>ANGPT2</i>       | 0.652  | 0.00721 | 0.30850 | 0.649  | 0.00719 | 0.266580 |
| ENSG00000166578 | <i>IQCD</i>         | 0.764  | 0.00517 | 0.25191 | 0.736  | 0.00720 | 0.266580 |
| ENSG00000274073 | <i>TFPT</i>         | 2.082  | 0.00433 | 0.22662 | 0.694  | 0.00720 | 0.266580 |
| ENSG00000260105 | <i>AOC4P</i>        | 1.193  | 0.00316 | 0.18961 | 0.892  | 0.00721 | 0.266583 |
| ENSG00000119630 | <i>PGF</i>          | -0.685 | 0.00645 | 0.28908 | -0.664 | 0.00723 | 0.267230 |
| ENSG00000205913 | <i>SRRM2-AS1</i>    | 0.827  | 0.00307 | 0.18607 | 0.740  | 0.00724 | 0.267560 |
| ENSG00000160094 | <i>ZNF362</i>       | -0.648 | 0.00649 | 0.28982 | -0.632 | 0.00727 | 0.268507 |
| ENSG00000130208 | <i>APOC1</i>        | -0.847 | 0.00217 | 0.15040 | -0.712 | 0.00730 | 0.269365 |
| ENSG00000114978 | <i>MOB1A</i>        | -0.563 | 0.00655 | 0.29177 | -0.555 | 0.00731 | 0.269446 |
| ENSG00000141429 | <i>GALNT1</i>       | -0.551 | 0.00814 | 0.32767 | -0.557 | 0.00738 | 0.271148 |
| ENSG00000145990 | <i>GFOD1</i>        | -0.634 | 0.00748 | 0.31537 | -0.629 | 0.00739 | 0.271372 |
| ENSG00000198886 | <i>ND4</i>          | 0.554  | 0.00689 | 0.30046 | 0.549  | 0.00739 | 0.271414 |
| ENSG00000205838 | <i>TTC23L</i>       | 0.977  | 0.00604 | 0.27771 | 0.938  | 0.00744 | 0.272744 |
| ENSG00000235657 | <i>HLA-A</i>        | -0.595 | 0.00589 | 0.27398 | -0.556 | 0.00747 | 0.272923 |
| ENSG00000108255 | <i>CRYBA1</i>       | 0.832  | 0.00748 | 0.31537 | 0.829  | 0.00748 | 0.273050 |
| ENSG00000168246 | <i>UBTD2</i>        | -0.583 | 0.00768 | 0.31939 | -0.581 | 0.00748 | 0.273050 |
| ENSG00000164850 | <i>GPER1</i>        | 0.775  | 0.00899 | 0.34841 | 0.787  | 0.00749 | 0.273170 |
| ENSG00000177679 | <i>SRRM3</i>        | -0.613 | 0.00786 | 0.32074 | -0.614 | 0.00751 | 0.273484 |
| ENSG00000134602 | <i>STK26</i>        | -0.594 | 0.00706 | 0.30415 | -0.585 | 0.00751 | 0.273484 |
| ENSG00000113924 | <i>HGD</i>          | 1.612  | 0.00510 | 0.24994 | 1.414  | 0.00759 | 0.275242 |
| ENSG00000169299 | <i>PGM2</i>         | -0.568 | 0.00740 | 0.31413 | -0.561 | 0.00761 | 0.275715 |
| ENSG00000157657 | <i>ZNF618</i>       | -0.568 | 0.00777 | 0.32074 | -0.567 | 0.00766 | 0.276491 |
| ENSG00000284967 | <i>FDFT1</i>        | 0.546  | 0.00923 | 0.35316 | 0.552  | 0.00770 | 0.277380 |
| ENSG00000180628 | <i>PCGF5</i>        | -0.565 | 0.00798 | 0.32299 | -0.566 | 0.00774 | 0.278622 |
| ENSG00000100116 | <i>GCAT</i>         | -0.585 | 0.00749 | 0.31537 | -0.576 | 0.00776 | 0.278971 |
| ENSG00000153936 | <i>HS2ST1</i>       | -0.568 | 0.00735 | 0.31268 | -0.564 | 0.00776 | 0.278998 |
| ENSG00000143110 | <i>C1orf162</i>     | 1.830  | 0.00276 | 0.17464 | 1.607  | 0.00779 | 0.279532 |
| ENSG00000117519 | <i>CNN3</i>         | -0.562 | 0.00713 | 0.30639 | -0.554 | 0.00779 | 0.279545 |
| ENSG00000180332 | <i>KCTD4</i>        | 0.896  | 0.00721 | 0.30846 | 0.879  | 0.00784 | 0.279999 |
| ENSG00000170092 | <i>SPDYE5</i>       | 0.708  | 0.00417 | 0.22396 | 0.586  | 0.00788 | 0.279999 |
| ENSG00000134709 | <i>HOOK1</i>        | -0.587 | 0.00710 | 0.30600 | -0.575 | 0.00788 | 0.279999 |
| ENSG00000268941 | <i>LINC01711</i>    | 3.343  | 0.00788 | 0.32074 | 3.340  | 0.00788 | 0.279999 |
| ENSG00000284154 | <i>MIR3605</i>      | -3.269 | 0.00788 | 0.32074 | -3.272 | 0.00788 | 0.279999 |
| ENSG00000089022 | <i>MAPKAPK5</i>     | 0.554  | 0.00857 | 0.33874 | 0.557  | 0.00789 | 0.279999 |
| ENSG00000177042 | <i>TMEM80</i>       | 0.627  | 0.00711 | 0.30614 | 0.615  | 0.00793 | 0.281357 |
| ENSG00000236778 | <i>INTS6-AS1</i>    | 0.853  | 0.00856 | 0.33865 | 0.853  | 0.00795 | 0.281878 |
| ENSG00000182240 | <i>BACE2</i>        | -0.610 | 0.00846 | 0.33634 | -0.603 | 0.00797 | 0.281878 |
| ENSG00000197442 | <i>MAP3K5</i>       | -0.696 | 0.00290 | 0.17968 | -0.606 | 0.00797 | 0.281878 |
| ENSG00000260034 | <i>LCMT1-AS2</i>    | 0.692  | 0.00580 | 0.27131 | 0.666  | 0.00800 | 0.282328 |

|                 |                   |        |         |         |        |         |          |
|-----------------|-------------------|--------|---------|---------|--------|---------|----------|
| ENSG00000065413 | <i>ANKRD44</i>    | -0.862 | 0.00182 | 0.13495 | -0.708 | 0.00806 | 0.284064 |
| ENSG00000145920 | <i>CPLX2</i>      | 1.062  | 0.00896 | 0.34775 | 1.058  | 0.00815 | 0.287036 |
| ENSG00000108582 | <i>CPD</i>        | -0.543 | 0.00867 | 0.34165 | -0.546 | 0.00818 | 0.287554 |
| ENSG00000117592 | <i>PRDX6</i>      | -0.561 | 0.00680 | 0.29737 | -0.547 | 0.00821 | 0.287839 |
| ENSG00000087111 | <i>PIGS</i>       | -0.601 | 0.00502 | 0.24811 | -0.563 | 0.00824 | 0.288570 |
| ENSG00000245573 | <i>BDNF-AS</i>    | 0.610  | 0.00657 | 0.29219 | 0.591  | 0.00826 | 0.288873 |
| ENSG00000113621 | <i>TXNDC15</i>    | -0.558 | 0.00995 | 0.36854 | -0.569 | 0.00827 | 0.289081 |
| ENSG00000128791 | <i>TWSG1</i>      | -0.589 | 0.00596 | 0.27577 | -0.564 | 0.00828 | 0.289158 |
| ENSG00000130309 | <i>COLGALT1</i>   | -0.557 | 0.00742 | 0.31465 | -0.548 | 0.00828 | 0.289158 |
| ENSG00000196586 | <i>MYO6</i>       | -0.541 | 0.00991 | 0.36824 | -0.551 | 0.00833 | 0.290325 |
| ENSG00000205334 | <i>LINC01460</i>  | 1.523  | 0.00661 | 0.29219 | 1.442  | 0.00834 | 0.290325 |
| ENSG00000131724 | <i>IL13RA1</i>    | -0.584 | 0.00658 | 0.29219 | -0.564 | 0.00836 | 0.290553 |
| ENSG00000104341 | <i>LAPTM4B</i>    | -0.551 | 0.00755 | 0.31707 | -0.543 | 0.00839 | 0.291212 |
| ENSG00000144847 | <i>IGSF11</i>     | -1.590 | 0.00841 | 0.33546 | -1.593 | 0.00841 | 0.291254 |
| ENSG00000188404 | <i>SELL</i>       | -1.032 | 0.00394 | 0.21680 | -0.912 | 0.00843 | 0.291254 |
| ENSG00000182782 | <i>HCAR2</i>      | 0.959  | 0.00672 | 0.29459 | 0.886  | 0.00843 | 0.291254 |
| ENSG00000180914 | <i>OXTR</i>       | 0.717  | 0.00786 | 0.32074 | 0.703  | 0.00851 | 0.293116 |
| ENSG00000145365 | <i>TIFA</i>       | -0.575 | 0.00936 | 0.35696 | -0.584 | 0.00853 | 0.293398 |
| ENSG00000204588 | <i>LINC01123</i>  | 0.668  | 0.00346 | 0.20014 | 0.570  | 0.00864 | 0.295775 |
| ENSG00000064687 | <i>ABCA7</i>      | 0.555  | 0.00822 | 0.33019 | 0.549  | 0.00866 | 0.296301 |
| ENSG00000162999 | <i>DUSP19</i>     | -0.745 | 0.00630 | 0.28585 | -0.711 | 0.00874 | 0.297834 |
| ENSG00000169599 | <i>NFU1</i>       | -0.646 | 0.00456 | 0.23309 | -0.572 | 0.00879 | 0.298934 |
| ENSG00000185519 | <i>FAM131C</i>    | -0.786 | 0.00419 | 0.22398 | -0.661 | 0.00879 | 0.298934 |
| ENSG00000202354 | <i>RNY3</i>       | -1.293 | 0.00526 | 0.25533 | -0.758 | 0.00880 | 0.298995 |
| ENSG00000141622 | <i>RNF165</i>     | -0.668 | 0.00768 | 0.31924 | -0.652 | 0.00888 | 0.300069 |
| ENSG00000162437 | <i>RAVER2</i>     | -0.553 | 0.00955 | 0.36180 | -0.555 | 0.00889 | 0.300069 |
| ENSG00000262943 | <i>ALOX12P2</i>   | 0.571  | 0.00837 | 0.33478 | 0.563  | 0.00889 | 0.300069 |
| ENSG00000237333 | <i>MSH5</i>       | 0.856  | 0.00795 | 0.32260 | 0.592  | 0.00889 | 0.300069 |
| ENSG00000173230 | <i>GOLGB1</i>     | 0.564  | 0.00647 | 0.28959 | 0.542  | 0.00890 | 0.300069 |
| ENSG00000132965 | <i>ALOX5AP</i>    | 6.042  | 0.00894 | 0.34775 | 6.040  | 0.00894 | 0.300069 |
| ENSG00000144230 | <i>GPR17</i>      | 6.042  | 0.00894 | 0.34775 | 6.040  | 0.00894 | 0.300069 |
| ENSG00000120279 | <i>MYCT1</i>      | -6.003 | 0.00894 | 0.34775 | -6.005 | 0.00894 | 0.300069 |
| ENSG00000169302 | <i>STK32A</i>     | 6.042  | 0.00894 | 0.34775 | 6.040  | 0.00894 | 0.300069 |
| ENSG00000151164 | <i>RAD9B</i>      | 1.123  | 0.00758 | 0.31707 | 1.059  | 0.00896 | 0.300125 |
| ENSG00000237986 | <i>CELF2-AS2</i>  | 1.062  | 0.00896 | 0.34775 | 1.059  | 0.00896 | 0.300125 |
| ENSG00000104320 | <i>NBN</i>        | -0.545 | 0.00913 | 0.35120 | -0.545 | 0.00897 | 0.300381 |
| ENSG00000119608 | <i>PROX2</i>      | 0.698  | 0.00987 | 0.36710 | 0.702  | 0.00902 | 0.301310 |
| ENSG00000112208 | <i>BAG2</i>       | -0.542 | 0.00964 | 0.36222 | -0.546 | 0.00905 | 0.301310 |
| ENSG00000206493 | <i>HLA-E</i>      | -0.711 | 0.00568 | 0.26897 | -0.555 | 0.00906 | 0.301310 |
| ENSG00000151468 | <i>CCDC3</i>      | -0.847 | 0.00650 | 0.29025 | -0.806 | 0.00915 | 0.302964 |
| ENSG00000067082 | <i>KLF6</i>       | -0.540 | 0.00916 | 0.35165 | -0.540 | 0.00915 | 0.302964 |
| ENSG00000151117 | <i>TMEM86A</i>    | -1.398 | 0.00917 | 0.35165 | -1.401 | 0.00917 | 0.302964 |
| ENSG00000137825 | <i>ITPKA</i>      | -0.712 | 0.00591 | 0.27485 | -0.660 | 0.00917 | 0.302964 |
| ENSG00000127366 | <i>TAS2R5</i>     | 0.852  | 0.00743 | 0.31468 | 0.825  | 0.00921 | 0.303095 |
| ENSG00000117122 | <i>MFAP2</i>      | -0.575 | 0.00946 | 0.36054 | -0.559 | 0.00937 | 0.306681 |
| ENSG00000007944 | <i>MYLIP</i>      | -0.650 | 0.00909 | 0.35080 | -0.643 | 0.00942 | 0.307253 |
| ENSG00000231177 | <i>LINC00852</i>  | 0.751  | 0.00599 | 0.27617 | 0.715  | 0.00959 | 0.310963 |
| ENSG00000235214 | <i>FAM83C-AS1</i> | -2.589 | 0.00961 | 0.36180 | -2.592 | 0.00961 | 0.310963 |
| ENSG00000271626 | <i>H3P42</i>      | -2.589 | 0.00961 | 0.36180 | -2.592 | 0.00961 | 0.310963 |
| ENSG00000137674 | <i>MMP20</i>      | 2.665  | 0.00961 | 0.36180 | 2.662  | 0.00961 | 0.310963 |
| ENSG00000162881 | <i>OXER1</i>      | 2.665  | 0.00961 | 0.36180 | 2.662  | 0.00961 | 0.310963 |
| ENSG00000120949 | <i>TNFRSF8</i>    | -2.174 | 0.00423 | 0.22500 | -1.751 | 0.00963 | 0.310963 |
| ENSG00000100079 | <i>LGALS2</i>     | -1.747 | 0.00963 | 0.36180 | -1.751 | 0.00963 | 0.310963 |
| ENSG00000260423 | <i>LINC02367</i>  | 0.828  | 0.00241 | 0.16037 | 0.660  | 0.00964 | 0.311043 |
| ENSG00000177363 | <i>LRRN4CL</i>    | 0.972  | 0.00782 | 0.32074 | 0.930  | 0.00965 | 0.311043 |
| ENSG00000229589 | <i>ACVR2B-AS1</i> | 0.942  | 0.00744 | 0.31473 | 0.902  | 0.00982 | 0.315185 |

|                 |                |        |         |         |        |         |          |
|-----------------|----------------|--------|---------|---------|--------|---------|----------|
| ENSG00000136868 | <i>SLC31A1</i> | -0.567 | 0.00788 | 0.32074 | -0.549 | 0.00983 | 0.315253 |
| ENSG00000167216 | <i>KATNAL2</i> | 0.744  | 0.00413 | 0.22315 | 0.663  | 0.00995 | 0.317511 |
| ENSG00000117152 | <i>RGS4</i>    | -1.747 | 0.00963 | 0.36180 | -1.532 | 0.01917 | 0.458965 |

b) *siEHMT2*

| ENSEMBL ID      | Gene Symbol         | Bowtie2 |          |          | STAR   |          |          |
|-----------------|---------------------|---------|----------|----------|--------|----------|----------|
|                 |                     | logFC   | P-Value  | FDR      | logFC  | P-Value  | FDR      |
| ENSG00000197915 | <i>HRNR</i>         | 4,457   | 3,91E-32 | 2,54E-27 | 4,235  | 5,27E-46 | 3,41E-41 |
| ENSG00000144063 | <i>MALL</i>         | -1,946  | 4,35E-19 | 7,05E-15 | -2,093 | 2,27E-22 | 7,35E-18 |
| ENSG00000143631 | <i>FLG</i>          | 3,806   | 2,86E-13 | 1,54E-09 | 4,417  | 7,49E-20 | 1,05E-15 |
| ENSG00000171903 | <i>CYP4F11</i>      | 2,189   | 7,24E-20 | 2,35E-15 | 2,145  | 1,10E-19 | 1,05E-15 |
| ENSG00000110492 | <i>MDK</i>          | -1,936  | 2,19E-19 | 4,73E-15 | -1,948 | 1,14E-19 | 1,05E-15 |
| ENSG00000156510 | <i>HKDC1</i>        | 2,285   | 1,20E-17 | 1,11E-13 | 2,288  | 7,15E-19 | 3,56E-15 |
| ENSG00000204371 | <i>EHMT2</i>        | 1,826   | 5,41E-11 | 1,30E-07 | 1,940  | 1,81E-18 | 8,38E-15 |
| ENSG00000186480 | <i>INSIG1</i>       | 1,884   | 3,11E-18 | 4,03E-14 | 1,868  | 4,79E-18 | 2,07E-14 |
| ENSG00000163435 | <i>ELF3</i>         | 2,248   | 4,82E-16 | 3,91E-12 | 2,319  | 9,05E-18 | 3,54E-14 |
| ENSG00000169174 | <i>PCSK9</i>        | 1,882   | 1,03E-17 | 1,11E-13 | 1,876  | 9,28E-18 | 3,54E-14 |
| ENSG00000182158 | <i>CREB3L2</i>      | -1,766  | 4,22E-15 | 2,49E-11 | -1,782 | 1,94E-15 | 6,98E-12 |
| ENSG00000168993 | <i>CPLX1</i>        | -1,724  | 3,75E-12 | 1,28E-08 | -1,780 | 5,20E-13 | 1,78E-09 |
| ENSG00000073150 | <i>PANX2</i>        | -1,702  | 1,49E-12 | 6,05E-09 | -1,718 | 5,92E-13 | 1,84E-09 |
| ENSG00000099250 | <i>NRP1</i>         | -1,691  | 5,78E-13 | 2,88E-09 | -1,670 | 5,95E-13 | 1,84E-09 |
| ENSG00000057468 | <i>MSH4</i>         | 1,819   | 8,84E-13 | 4,09E-09 | 1,777  | 7,37E-13 | 2,17E-09 |
| ENSG00000079459 | <i>FDFT1</i>        | 1,480   | 5,65E-12 | 1,59E-08 | 1,495  | 1,43E-12 | 4,04E-09 |
| ENSG00000112972 | <i>HMGCS1</i>       | 1,461   | 3,60E-12 | 1,28E-08 | 1,459  | 3,63E-12 | 9,41E-09 |
| ENSG00000167767 | <i>KRT80</i>        | 1,523   | 4,96E-12 | 1,53E-08 | 1,490  | 1,07E-11 | 2,66E-08 |
| ENSG00000131069 | <i>ACSS2</i>        | 1,477   | 2,14E-11 | 5,78E-08 | 1,484  | 1,14E-11 | 2,75E-08 |
| ENSG00000143183 | <i>TMCO1</i>        | -1,414  | 7,54E-11 | 1,63E-07 | -1,457 | 1,40E-11 | 3,25E-08 |
| ENSG00000181458 | <i>TMEM45A</i>      | -1,793  | 9,28E-11 | 1,94E-07 | -1,792 | 3,10E-11 | 6,94E-08 |
| ENSG00000080573 | <i>COL5A3</i>       | -1,937  | 4,87E-08 | 5,74E-05 | -2,030 | 3,40E-11 | 7,35E-08 |
| ENSG00000185262 | <i>UBALD2</i>       | 1,403   | 1,62E-10 | 3,08E-07 | 1,447  | 3,74E-11 | 7,81E-08 |
| ENSG00000183087 | <i>GAS6</i>         | -1,383  | 6,24E-10 | 1,07E-06 | -1,470 | 4,00E-11 | 8,11E-08 |
| ENSG00000175793 | <i>SFN</i>          | 1,397   | 3,52E-11 | 8,92E-08 | 1,387  | 4,76E-11 | 9,34E-08 |
| ENSG00000176485 | <i>PLAAT3</i>       | -1,911  | 6,30E-11 | 1,46E-07 | -1,832 | 5,09E-11 | 9,71E-08 |
| ENSG00000159055 | <i>MIS18A</i>       | 1,439   | 1,25E-10 | 2,45E-07 | 1,458  | 5,70E-11 | 1,06E-07 |
| ENSG00000164484 | <i>TMEM200A</i>     | -1,669  | 6,99E-11 | 1,56E-07 | -1,664 | 6,74E-11 | 1,21E-07 |
| ENSG00000245532 | <i>NEAT1</i>        | 1,344   | 1,12E-10 | 2,28E-07 | 1,339  | 1,31E-10 | 2,30E-07 |
| ENSG00000186529 | <i>CYP4F3</i>       | 1,658   | 1,49E-09 | 2,35E-06 | 1,669  | 3,69E-10 | 6,30E-07 |
| ENSG00000100292 | <i>HMOX1</i>        | 1,392   | 6,15E-10 | 1,07E-06 | 1,390  | 3,96E-10 | 6,59E-07 |
| ENSG00000272398 | <i>CD24</i>         | -1,638  | 3,62E-07 | 0,000355 | -1,796 | 9,40E-10 | 1,49E-06 |
| ENSG00000135318 | <i>NT5E</i>         | -1,364  | 5,19E-10 | 9,34E-07 | -1,331 | 1,11E-09 | 1,71E-06 |
| ENSG00000146648 | <i>EGFR</i>         | -1,273  | 3,10E-09 | 4,79E-06 | -1,277 | 2,25E-09 | 3,35E-06 |
| ENSG00000120708 | <i>TGFBI</i>        | 7,981   | 3,99E-09 | 5,89E-06 | 8,024  | 2,27E-09 | 3,35E-06 |
| ENSG00000135074 | <i>ADAM19</i>       | -1,756  | 4,42E-09 | 6,37E-06 | -1,721 | 2,70E-09 | 3,89E-06 |
| ENSG00000160285 | <i>LSS</i>          | 1,282   | 6,77E-09 | 9,34E-06 | 1,261  | 3,37E-09 | 4,61E-06 |
| ENSG00000167549 | <i>CORO6</i>        | 1,421   | 1,12E-09 | 1,86E-06 | 1,366  | 3,42E-09 | 4,61E-06 |
| ENSG00000052802 | <i>MSMO1</i>        | 1,239   | 5,69E-09 | 8,03E-06 | 1,228  | 7,26E-09 | 9,22E-06 |
| ENSG00000237686 | <i>LOC101929705</i> | 1,626   | 3,83E-08 | 4,60E-05 | 1,668  | 1,49E-08 | 1,83E-05 |
| ENSG00000117407 | <i>ARTN</i>         | 1,224   | 2,13E-08 | 2,66E-05 | 1,220  | 2,23E-08 | 2,67E-05 |
| ENSG00000234794 | <i>HLA-DRA</i>      | -2,683  | 0,00243  | 0,256608 | -2,303 | 2,40E-08 | 2,68E-05 |
| ENSG00000078018 | <i>MAP2</i>         | 1,243   | 1,63E-08 | 2,16E-05 | 1,214  | 2,74E-08 | 3,01E-05 |
| ENSG00000174938 | <i>SEZ6L2</i>       | -1,176  | 8,91E-08 | 0,000101 | -1,205 | 3,25E-08 | 3,51E-05 |
| ENSG00000137440 | <i>FGFBP1</i>       | 1,284   | 2,13E-08 | 2,66E-05 | 1,253  | 3,73E-08 | 3,96E-05 |
| ENSG00000113161 | <i>HMGCR</i>        | 1,125   | 7,15E-08 | 8,28E-05 | 1,137  | 4,98E-08 | 5,21E-05 |
| ENSG00000179750 | <i>APOBEC3B</i>     | 1,375   | 3,82E-08 | 4,60E-05 | 1,275  | 7,13E-08 | 7,22E-05 |

|                 |              |        |          |          |        |          |          |
|-----------------|--------------|--------|----------|----------|--------|----------|----------|
| ENSG00000153253 | SCN3A        | -1,661 | 9,62E-08 | 0,000106 | -1,623 | 8,31E-08 | 8,29E-05 |
| ENSG00000120437 | ACAT2        | 1,139  | 2,55E-07 | 0,000272 | 1,164  | 8,62E-08 | 8,46E-05 |
| ENSG00000162496 | DHRS3        | 1,305  | 2,63E-06 | 0,001874 | 1,464  | 1,02E-07 | 9,86E-05 |
| ENSG00000188015 | S100A3       | 1,978  | 9,53E-08 | 0,000106 | 1,881  | 1,09E-07 | 0,00010  |
| ENSG00000187867 | PALM3        | -1,256 | 4,99E-07 | 0,000455 | -1,279 | 2,13E-07 | 0,00020  |
| ENSG00000128564 | VGf          | -1,193 | 3,13E-07 | 0,000326 | -1,203 | 2,39E-07 | 0,00022  |
| ENSG00000111799 | COL12A1      | -1,135 | 2,17E-07 | 0,000234 | -1,113 | 2,58E-07 | 0,00024  |
| ENSG00000184602 | SNN          | -1,195 | 4,04E-07 | 0,000385 | -1,209 | 2,67E-07 | 0,00024  |
| ENSG00000110917 | MLEC         | -1,068 | 3,16E-07 | 0,000326 | -1,066 | 3,27E-07 | 0,00029  |
| ENSG00000165802 | NSMF         | -1,021 | 1,01E-06 | 0,000850 | -1,064 | 3,31E-07 | 0,00029  |
| ENSG00000023445 | BIRC3        | 1,273  | 3,50E-07 | 0,000355 | 1,273  | 3,41E-07 | 0,00029  |
| ENSG00000125462 | C1orf61      | 1,095  | 4,40E-07 | 0,000413 | 1,100  | 3,81E-07 | 0,00033  |
| ENSG00000145284 | SCD5         | -1,223 | 3,69E-07 | 0,000357 | -1,203 | 4,70E-07 | 0,00040  |
| ENSG00000212724 | KRTAP2-3     | -1,215 | 0,00039  | 0,080164 | -1,372 | 4,89E-07 | 0,00040  |
| ENSG00000177542 | SLC25A22     | -1,068 | 1,09E-06 | 0,000871 | -1,089 | 5,61E-07 | 0,00046  |
| ENSG00000242265 | PEG10        | -1,304 | 6,25E-07 | 0,000563 | -1,299 | 6,31E-07 | 0,00050  |
| ENSG00000084234 | APLP2        | -1,034 | 6,84E-07 | 0,000607 | -1,035 | 6,56E-07 | 0,00052  |
| ENSG00000112715 | VEGFA        | 1,044  | 9,68E-07 | 0,000826 | 1,050  | 7,96E-07 | 0,00062  |
| ENSG00000164483 | SAMD3        | -1,964 | 1,02E-06 | 0,000850 | -1,828 | 8,16E-07 | 0,00063  |
| ENSG00000157087 | ATP2B2       | -1,886 | 3,56E-07 | 0,000355 | -1,778 | 8,29E-07 | 0,00063  |
| ENSG00000229261 | LOC101928994 | 1,336  | 1,98E-06 | 0,001478 | 1,360  | 9,03E-07 | 0,00068  |
| ENSG00000075426 | FOSL2        | 1,027  | 1,32E-06 | 0,001038 | 1,041  | 9,19E-07 | 0,00069  |
| ENSG00000121073 | SLC35B1      | -0,989 | 3,92E-06 | 0,002594 | -1,041 | 9,85E-07 | 0,00073  |
| ENSG00000082146 | STRADB       | -1,069 | 5,37E-05 | 0,020374 | -1,224 | 1,00E-06 | 0,00073  |
| ENSG00000155629 | PIK3AP1      | -1,424 | 4,47E-07 | 0,000414 | -1,303 | 1,12E-06 | 0,00081  |
| ENSG00000162745 | OLFML2B      | -1,980 | 5,78E-06 | 0,003500 | -1,997 | 1,13E-06 | 0,00081  |
| ENSG00000150961 | SEC24D       | -0,995 | 3,71E-06 | 0,002480 | -1,037 | 1,16E-06 | 0,00082  |
| ENSG00000102098 | SCML2        | 1,016  | 5,62E-06 | 0,003435 | 1,070  | 1,37E-06 | 0,00095  |
| ENSG00000116983 | HPCAL4       | -1,216 | 2,63E-06 | 0,001874 | -1,246 | 1,38E-06 | 0,00095  |
| ENSG00000104442 | ARMC1        | 1,036  | 1,33E-06 | 0,001038 | 1,019  | 1,81E-06 | 0,00121  |
| ENSG00000148248 | SURF4        | -0,957 | 6,78E-06 | 0,003893 | -0,997 | 1,90E-06 | 0,00123  |
| ENSG00000111319 | SCNN1A       | 1,134  | 7,70E-07 | 0,000675 | 1,080  | 1,94E-06 | 0,00125  |
| ENSG00000111145 | ELK3         | -1,039 | 1,67E-06 | 0,001257 | -1,029 | 1,99E-06 | 0,00126  |
| ENSG00000050405 | LIMA1        | 1,056  | 1,08E-06 | 0,000871 | 1,019  | 2,14E-06 | 0,00135  |
| ENSG00000138759 | FRAS1        | -0,993 | 2,89E-06 | 0,001990 | -0,999 | 2,24E-06 | 0,00140  |
| ENSG00000187475 | H1-6         | -2,117 | 2,28E-06 | 0,001660 | -2,112 | 2,28E-06 | 0,00141  |
| ENSG00000213937 | CLDN9        | 7,289  | 4,54E-06 | 0,002902 | 7,358  | 2,48E-06 | 0,00151  |
| ENSG00000225855 | RUSC1-AS1    | 1,109  | 2,66E-06 | 0,001874 | 1,114  | 2,50E-06 | 0,00151  |
| ENSG00000074416 | MGLL         | 1,538  | 9,40E-06 | 0,005208 | 1,617  | 2,54E-06 | 0,00153  |
| ENSG00000139318 | DUSP6        | -1,013 | 3,69E-06 | 0,002480 | -1,025 | 2,78E-06 | 0,00165  |
| ENSG00000158104 | HPD          | 1,334  | 0,00015  | 0,040846 | 1,580  | 3,29E-06 | 0,00190  |
| ENSG00000160014 | CALM3        | 0,982  | 2,80E-06 | 0,001953 | 0,972  | 3,33E-06 | 0,00191  |
| ENSG00000119335 | SET          | 0,861  | 3,24E-05 | 0,013726 | 0,959  | 3,57E-06 | 0,00203  |
| ENSG00000117322 | CR2          | -1,354 | 2,04E-05 | 0,009400 | -1,406 | 3,88E-06 | 0,00213  |
| ENSG00000168243 | GNG4         | -1,023 | 0,00116  | 0,166078 | -1,205 | 4,05E-06 | 0,00221  |
| ENSG00000101935 | AMMECR1      | 1,001  | 5,61E-06 | 0,003435 | 1,008  | 4,57E-06 | 0,00245  |
| ENSG00000157570 | TSPAN18      | -1,050 | 0,00011  | 0,032629 | -1,204 | 4,67E-06 | 0,00248  |
| ENSG00000116133 | DHCR24       | 0,954  | 4,61E-06 | 0,002905 | 0,949  | 5,04E-06 | 0,00266  |
| ENSG00000006016 | CRLF1        | -1,079 | 1,89E-05 | 0,008898 | -1,128 | 5,34E-06 | 0,00279  |
| ENSG00000179593 | ALOX15B      | -3,191 | 8,97E-07 | 0,000776 | -2,705 | 5,57E-06 | 0,00289  |
| ENSG00000073849 | ST6GAL1      | -0,981 | 1,63E-05 | 0,007851 | -1,025 | 5,92E-06 | 0,00304  |
| ENSG00000008735 | MAPK8IP2     | -0,998 | 1,21E-05 | 0,006217 | -1,024 | 6,14E-06 | 0,00307  |
| ENSG00000174460 | ZCCHC12      | -2,145 | 4,28E-05 | 0,017114 | -2,319 | 6,22E-06 | 0,00307  |
| ENSG00000124334 | IL9R         | 3,941  | 8,08E-05 | 0,026882 | 2,622  | 6,24E-06 | 0,00307  |
| ENSG00000135480 | KRT7         | 1,420  | 6,52E-06 | 0,003776 | 1,353  | 6,45E-06 | 0,00314  |
| ENSG00000235269 | LINC02331    | -1,100 | 6,22E-06 | 0,003700 | -1,074 | 6,93E-06 | 0,00335  |

|                 |                  |        |          |          |        |          |         |
|-----------------|------------------|--------|----------|----------|--------|----------|---------|
| ENSG00000101188 | <i>NTSR1</i>     | -0,969 | 6,33E-06 | 0,003700 | -0,960 | 7,14E-06 | 0,00343 |
| ENSG00000156042 | <i>CFAP70</i>    | 0,980  | 1,02E-05 | 0,005528 | 0,988  | 7,64E-06 | 0,00362 |
| ENSG00000188897 | <i>LOC400499</i> | 0,981  | 1,03E-05 | 0,005534 | 0,985  | 7,73E-06 | 0,00363 |
| ENSG00000162426 | <i>SLC45A1</i>   | -1,233 | 1,43E-05 | 0,007029 | -1,229 | 8,68E-06 | 0,00402 |
| ENSG00000184613 | <i>NELL2</i>     | -1,777 | 0,00011  | 0,033272 | -1,915 | 8,76E-06 | 0,00403 |
| ENSG00000145246 | <i>ATP10D</i>    | -1,019 | 1,98E-05 | 0,009256 | -1,043 | 8,95E-06 | 0,00409 |
| ENSG00000134531 | <i>EMP1</i>      | 1,127  | 6,32E-06 | 0,003700 | 1,101  | 9,63E-06 | 0,00428 |
| ENSG00000198911 | <i>SREBF2</i>    | 0,914  | 1,22E-05 | 0,006217 | 0,923  | 9,64E-06 | 0,00428 |
| ENSG00000180758 | <i>GPR157</i>    | -1,109 | 4,21E-06 | 0,002760 | -1,058 | 9,81E-06 | 0,00433 |
| ENSG00000164236 | <i>ANKRD33B</i>  | 1,059  | 7,05E-06 | 0,004008 | 1,036  | 1,02E-05 | 0,00448 |
| ENSG00000160752 | <i>FDPS</i>      | 0,924  | 1,71E-05 | 0,008107 | 0,931  | 1,05E-05 | 0,00456 |
| ENSG00000147883 | <i>CDKN2B</i>    | 0,977  | 4,35E-06 | 0,002821 | 0,934  | 1,09E-05 | 0,00470 |
| ENSG00000165424 | <i>ZCCHC24</i>   | -1,191 | 1,01E-05 | 0,005509 | -1,180 | 1,12E-05 | 0,00477 |
| ENSG00000147124 | <i>ZNF41</i>     | -0,980 | 1,30E-05 | 0,006487 | -0,983 | 1,15E-05 | 0,00489 |
| ENSG00000230667 | <i>SETSIP</i>    | 1,070  | 1,42E-06 | 0,001095 | 0,939  | 1,18E-05 | 0,00496 |
| ENSG00000137414 | <i>FAM8A1</i>    | -0,978 | 1,10E-05 | 0,005814 | -0,971 | 1,19E-05 | 0,00496 |
| ENSG00000163820 | <i>FYCO1</i>     | -0,926 | 1,65E-05 | 0,007876 | -0,935 | 1,23E-05 | 0,00510 |
| ENSG00000189143 | <i>CLDN4</i>     | 0,926  | 1,25E-05 | 0,006280 | 0,921  | 1,35E-05 | 0,00554 |
| ENSG00000136490 | <i>LIMD2</i>     | -1,083 | 5,85E-05 | 0,021300 | -1,147 | 1,39E-05 | 0,00566 |
| ENSG00000238741 | <i>SCARNA7</i>   | -0,946 | 1,35E-05 | 0,006697 | -0,943 | 1,41E-05 | 0,00566 |
| ENSG00000137491 | <i>SLCO2B1</i>   | 1,627  | 5,53E-06 | 0,003435 | 1,491  | 1,45E-05 | 0,00580 |
| ENSG00000185515 | <i>BRCC3</i>     | 0,935  | 1,63E-05 | 0,007851 | 0,930  | 1,51E-05 | 0,00597 |
| ENSG00000133687 | <i>TMTC1</i>     | -1,271 | 9,99E-06 | 0,005489 | -1,220 | 1,58E-05 | 0,00615 |
| ENSG00000198794 | <i>SCAMP5</i>    | -1,119 | 1,19E-05 | 0,006167 | -1,080 | 1,63E-05 | 0,00630 |
| ENSG00000150201 | <i>FXYD4</i>     | -1,450 | 0,00134  | 0,176284 | -1,620 | 1,70E-05 | 0,00650 |
| ENSG00000186063 | <i>AIDA</i>      | -0,853 | 9,92E-05 | 0,031531 | -0,906 | 2,03E-05 | 0,00769 |
| ENSG00000128228 | <i>SDF2L1</i>    | -0,894 | 5,34E-05 | 0,020374 | -0,932 | 2,26E-05 | 0,00853 |
| ENSG00000167508 | <i>MVD</i>       | 0,928  | 1,11E-05 | 0,005814 | 0,888  | 2,44E-05 | 0,00915 |
| ENSG00000166128 | <i>RAB8B</i>     | -0,950 | 2,84E-05 | 0,012183 | -0,948 | 2,49E-05 | 0,00928 |
| ENSG00000179388 | <i>EGR3</i>      | -1,290 | 2,55E-05 | 0,011002 | -1,285 | 2,50E-05 | 0,00928 |
| ENSG00000026751 | <i>SLAMF7</i>    | -1,734 | 4,69E-05 | 0,018640 | -1,759 | 2,62E-05 | 0,00960 |
| ENSG00000137834 | <i>SMAD6</i>     | 1,314  | 1,24E-05 | 0,006280 | 1,275  | 2,66E-05 | 0,00968 |
| ENSG00000143845 | <i>ETNK2</i>     | -0,990 | 7,01E-05 | 0,024703 | -1,023 | 2,78E-05 | 0,00994 |
| ENSG00000067064 | <i>IDI1</i>      | 0,889  | 2,53E-05 | 0,011002 | 0,882  | 2,79E-05 | 0,00994 |
| ENSG00000120742 | <i>SERP1</i>     | -0,905 | 1,56E-05 | 0,007594 | -0,875 | 2,89E-05 | 0,01010 |
| ENSG00000126709 | <i>IFI6</i>      | -1,292 | 0,00010  | 0,031531 | -1,320 | 2,90E-05 | 0,01010 |
| ENSG00000144597 | <i>EAFL1</i>     | 0,920  | 2,24E-05 | 0,010028 | 0,902  | 3,03E-05 | 0,01050 |
| ENSG00000158716 | <i>DUSP23</i>    | -2,259 | 7,46E-05 | 0,025583 | -2,340 | 3,27E-05 | 0,01128 |
| ENSG00000215114 | <i>UBXN2B</i>    | 0,870  | 5,83E-05 | 0,021300 | 0,893  | 3,32E-05 | 0,01139 |
| ENSG00000151224 | <i>MAT1A</i>     | -1,258 | 5,63E-05 | 0,020970 | -1,239 | 3,43E-05 | 0,01171 |
| ENSG00000197457 | <i>STMN3</i>     | -0,908 | 5,06E-05 | 0,019757 | -0,914 | 3,49E-05 | 0,01185 |
| ENSG00000134013 | <i>LOXL2</i>     | -1,057 | 2,22E-05 | 0,010021 | -0,998 | 3,61E-05 | 0,01218 |
| ENSG00000188536 | <i>HBA2</i>      | -1,756 | 0,00185  | 0,220208 | -1,625 | 3,77E-05 | 0,01268 |
| ENSG00000106853 | <i>PTGR1</i>     | 0,938  | 2,34E-05 | 0,010308 | 0,894  | 3,83E-05 | 0,01279 |
| ENSG00000079101 | <i>CLUL1</i>     | -2,209 | 0,00049  | 0,093909 | -2,631 | 4,05E-05 | 0,01332 |
| ENSG00000100906 | <i>NFKBIA</i>    | 0,895  | 3,32E-05 | 0,013871 | 0,877  | 4,18E-05 | 0,01369 |
| ENSG00000150625 | <i>GPM6A</i>     | -2,384 | 2,16E-05 | 0,009877 | -2,141 | 4,28E-05 | 0,01393 |
| ENSG00000132837 | <i>DMGDH</i>     | -1,104 | 0,00012  | 0,034410 | -1,128 | 4,35E-05 | 0,01411 |
| ENSG00000206450 | <i>HLA-B</i>     | -0,854 | 0,00051  | 0,096566 | -0,880 | 4,43E-05 | 0,01428 |
| ENSG00000162998 | <i>FRZB</i>      | 1,364  | 0,00018  | 0,048044 | 1,478  | 4,57E-05 | 0,01468 |
| ENSG00000245954 | <i>LINC02273</i> | -1,784 | 3,34E-05 | 0,013871 | -1,730 | 4,69E-05 | 0,01497 |
| ENSG00000171421 | <i>MRPL36</i>    | -0,912 | 6,60E-05 | 0,023521 | -0,917 | 4,88E-05 | 0,01543 |
| ENSG00000230798 | <i>FOXD3-AS1</i> | -2,160 | 0,00035  | 0,075198 | -2,298 | 4,94E-05 | 0,01548 |
| ENSG00000206172 | <i>HBA1</i>      | -1,543 | 0,00779  | 0,505555 | -1,547 | 4,94E-05 | 0,01548 |
| ENSG00000143341 | <i>HMCN1</i>     | -1,071 | 0,00094  | 0,145823 | -1,252 | 5,11E-05 | 0,01588 |
| ENSG00000114115 | <i>RBP1</i>      | -0,850 | 6,93E-05 | 0,024549 | -0,861 | 5,12E-05 | 0,01588 |

|                 |                  |        |          |          |        |          |         |
|-----------------|------------------|--------|----------|----------|--------|----------|---------|
| ENSG00000163297 | <i>ANTXR2</i>    | -0,914 | 7,28E-05 | 0,025375 | -0,922 | 5,26E-05 | 0,01620 |
| ENSG00000140280 | <i>LYSMD2</i>    | -1,044 | 5,77E-05 | 0,021265 | -1,045 | 5,35E-05 | 0,01635 |
| ENSG00000272636 | <i>DOC2B</i>     | -1,106 | 4,02E-05 | 0,016385 | -0,952 | 5,56E-05 | 0,01693 |
| ENSG00000135437 | <i>RDH5</i>      | 1,843  | 7,98E-05 | 0,026824 | 1,876  | 5,69E-05 | 0,01717 |
| ENSG00000169783 | <i>LINGO1</i>    | -0,955 | 5,19E-05 | 0,020142 | -0,948 | 5,72E-05 | 0,01717 |
| ENSG00000137193 | <i>PIM1</i>      | 0,969  | 5,61E-05 | 0,020970 | 0,953  | 5,78E-05 | 0,01726 |
| ENSG00000109501 | <i>WFS1</i>      | -0,847 | 0,00013  | 0,037316 | -0,884 | 5,98E-05 | 0,01771 |
| ENSG00000075420 | <i>FNDC3B</i>    | -0,882 | 3,31E-05 | 0,013871 | -0,846 | 6,24E-05 | 0,01838 |
| ENSG00000174010 | <i>KLHL15</i>    | 0,877  | 5,74E-05 | 0,021265 | 0,873  | 6,32E-05 | 0,01853 |
| ENSG00000130701 | <i>RBBP8NL</i>   | 2,433  | 0,00118  | 0,166302 | 2,550  | 6,40E-05 | 0,01870 |
| ENSG00000132603 | <i>NIP7</i>      | 0,842  | 6,55E-05 | 0,023474 | 0,840  | 6,52E-05 | 0,01897 |
| ENSG00000158286 | <i>RNF207</i>    | 0,866  | 6,34E-05 | 0,022952 | 0,861  | 6,67E-05 | 0,01925 |
| ENSG00000123989 | <i>CHPF</i>      | -0,826 | 8,32E-05 | 0,027375 | -0,836 | 6,68E-05 | 0,01925 |
| ENSG00000018236 | <i>CNTN1</i>     | -1,010 | 0,00304  | 0,289724 | -1,241 | 6,72E-05 | 0,01927 |
| ENSG00000164749 | <i>HNF4G</i>     | -1,071 | 7,85E-05 | 0,026800 | -1,050 | 6,82E-05 | 0,01948 |
| ENSG00000119328 | <i>ABITRAM</i>   | -0,812 | 0,00024  | 0,057958 | -0,875 | 6,97E-05 | 0,01979 |
| ENSG00000120215 | <i>MLANA</i>     | 1,183  | 0,00010  | 0,031531 | 1,193  | 6,99E-05 | 0,01979 |
| ENSG00000124733 | <i>MEA1</i>      | -0,829 | 0,00014  | 0,040312 | -0,857 | 7,28E-05 | 0,02036 |
| ENSG00000103855 | <i>CD276</i>     | -0,826 | 0,00011  | 0,032629 | -0,839 | 7,46E-05 | 0,02072 |
| ENSG00000170417 | <i>TMEM182</i>   | -1,035 | 5,35E-05 | 0,020374 | -0,996 | 7,61E-05 | 0,02099 |
| ENSG00000168785 | <i>TSPAN5</i>    | -0,842 | 7,91E-05 | 0,026824 | -0,841 | 7,64E-05 | 0,02099 |
| ENSG00000005893 | <i>LAMP2</i>     | -0,878 | 5,35E-05 | 0,020374 | -0,850 | 7,88E-05 | 0,02157 |
| ENSG00000105329 | <i>TGFB1</i>     | -0,850 | 0,00021  | 0,053776 | -0,891 | 8,06E-05 | 0,02195 |
| ENSG00000142192 | <i>APP</i>       | -0,795 | 0,00013  | 0,037556 | -0,816 | 8,36E-05 | 0,02267 |
| ENSG00000143061 | <i>IGSF3</i>     | -0,838 | 0,00011  | 0,033122 | -0,837 | 9,63E-05 | 0,02590 |
| ENSG00000224715 | <i>LOC339685</i> | 1,079  | 0,00018  | 0,047246 | 1,114  | 9,78E-05 | 0,02603 |
| ENSG00000163132 | <i>MSX1</i>      | 0,774  | 0,00022  | 0,054934 | 0,814  | 9,83E-05 | 0,02603 |
| ENSG00000130402 | <i>ACTN4</i>     | 0,811  | 9,64E-05 | 0,030994 | 0,804  | 9,84E-05 | 0,02603 |
| ENSG00000187730 | <i>GABRD</i>     | -1,284 | 4,11E-05 | 0,016544 | -1,161 | 0,000101 | 0,02640 |
| ENSG00000125744 | <i>RTN2</i>      | -0,914 | 0,00019  | 0,051343 | -0,941 | 0,000102 | 0,02640 |
| ENSG00000126231 | <i>PROZ</i>      | 1,348  | 0,00010  | 0,031531 | 1,352  | 0,000102 | 0,02640 |
| ENSG00000101955 | <i>SRPX</i>      | -1,289 | 7,32E-06 | 0,004125 | -1,056 | 0,000103 | 0,02651 |
| ENSG00000151090 | <i>THRB</i>      | -1,286 | 0,00020  | 0,051908 | -1,334 | 0,000105 | 0,02685 |
| ENSG00000109171 | <i>SLAIN2</i>    | -0,787 | 0,00023  | 0,057399 | -0,825 | 0,000109 | 0,02793 |
| ENSG00000262074 | <i>SNORD3B-2</i> | -0,801 | 0,00010  | 0,031541 | -0,795 | 0,000110 | 0,02795 |
| ENSG00000265185 | <i>SNORD3B-1</i> | -0,800 | 0,00010  | 0,031531 | -0,795 | 0,000111 | 0,02795 |
| ENSG00000100344 | <i>PNPLA3</i>    | 0,907  | 0,00036  | 0,076344 | 0,957  | 0,000111 | 0,02795 |
| ENSG00000189320 | <i>FAM180A</i>   | -1,618 | 0,00042  | 0,084312 | -1,745 | 0,000114 | 0,02861 |
| ENSG00000100167 | <i>SEPTIN3</i>   | -0,934 | 0,00045  | 0,087558 | -1,016 | 0,000116 | 0,02892 |
| ENSG00000134042 | <i>MRO</i>       | -1,380 | 0,00020  | 0,051908 | -1,387 | 0,000117 | 0,02892 |
| ENSG00000129910 | <i>CDH15</i>     | -1,383 | 0,00011  | 0,033272 | -1,294 | 0,000118 | 0,02906 |
| ENSG00000153904 | <i>DDAH1</i>     | 0,850  | 8,08E-05 | 0,026882 | 0,827  | 0,000121 | 0,02947 |
| ENSG00000165704 | <i>HPRT1</i>     | -0,791 | 0,00032  | 0,070037 | -0,827 | 0,000121 | 0,02947 |
| ENSG00000197580 | <i>BCO2</i>      | 1,071  | 8,19E-05 | 0,027076 | 1,024  | 0,000122 | 0,02973 |
| ENSG00000169247 | <i>SH3TC2</i>    | -0,865 | 0,00015  | 0,041711 | -0,868 | 0,000128 | 0,03099 |
| ENSG00000173530 | <i>TNFRSF10D</i> | 0,842  | 9,66E-05 | 0,030994 | 0,820  | 0,000129 | 0,03099 |
| ENSG00000130522 | <i>JUND</i>      | 0,784  | 0,00019  | 0,050228 | 0,800  | 0,000136 | 0,03258 |
| ENSG00000166961 | <i>MS4A15</i>    | -1,258 | 7,08E-05 | 0,024825 | -1,179 | 0,000140 | 0,03359 |
| ENSG00000174099 | <i>MSRB3</i>     | -0,860 | 0,00014  | 0,039953 | -0,848 | 0,000149 | 0,03521 |
| ENSG00000130303 | <i>BST2</i>      | -1,898 | 0,00061  | 0,109779 | -1,876 | 0,000153 | 0,03604 |
| ENSG00000118596 | <i>SLC16A7</i>   | -0,812 | 0,00025  | 0,060025 | -0,836 | 0,000155 | 0,03624 |
| ENSG00000213906 | <i>LTBR2</i>     | 1,251  | 5,00E-05 | 0,019632 | 0,985  | 0,000160 | 0,03698 |
| ENSG00000197635 | <i>DPP4</i>      | -1,099 | 0,00153  | 0,195030 | -1,199 | 0,000162 | 0,03722 |
| ENSG00000206435 | <i>HLA-C</i>     | -0,875 | 0,00020  | 0,051818 | -0,803 | 0,000169 | 0,03835 |
| ENSG00000089472 | <i>HEPH</i>      | -1,356 | 0,00024  | 0,058927 | -1,260 | 0,000172 | 0,03907 |
| ENSG00000132429 | <i>POPDC3</i>    | -0,947 | 0,00015  | 0,041554 | -0,916 | 0,000175 | 0,03937 |

|                 |                 |        |          |          |        |          |         |
|-----------------|-----------------|--------|----------|----------|--------|----------|---------|
| ENSG00000129990 | <i>SYT5</i>     | -1,576 | 0,00015  | 0,042127 | -1,418 | 0,000177 | 0,03981 |
| ENSG00000126016 | <i>AMOT</i>     | -1,001 | 0,00024  | 0,058927 | -1,010 | 0,000183 | 0,04089 |
| ENSG00000132964 | <i>CDK8</i>     | -0,841 | 0,00013  | 0,037383 | -0,810 | 0,000184 | 0,04089 |
| ENSG00000120306 | <i>CYSTM1</i>   | -0,829 | 0,00028  | 0,065526 | -0,845 | 0,000186 | 0,04127 |
| ENSG00000105605 | <i>CACNG7</i>   | -2,581 | 6,48E-05 | 0,023330 | -2,320 | 0,000201 | 0,04429 |
| ENSG00000164171 | <i>ITGA2</i>    | -0,777 | 0,00023  | 0,057248 | -0,781 | 0,000202 | 0,04449 |
| ENSG00000151468 | <i>CCDC3</i>    | -1,183 | 0,00014  | 0,039953 | -1,146 | 0,000206 | 0,04509 |
| ENSG00000253276 | <i>CCDC71L</i>  | -0,822 | 0,00020  | 0,051908 | -0,819 | 0,000212 | 0,04602 |
| ENSG00000126581 | <i>BECN1</i>    | 0,714  | 0,00099  | 0,150443 | 0,795  | 0,000213 | 0,04613 |
| ENSG00000242498 | <i>ARPIN</i>    | -0,848 | 0,00023  | 0,057074 | -0,850 | 0,000221 | 0,04751 |
| ENSG00000135002 | <i>RFK</i>      | -0,807 | 0,00022  | 0,056367 | -0,805 | 0,000222 | 0,04764 |
| ENSG00000111412 | <i>C12orf49</i> | 0,805  | 0,00016  | 0,043916 | 0,785  | 0,000225 | 0,04816 |
| ENSG00000237975 | <i>FLG-AS1</i>  | 2,225  | 0,00125  | 0,169289 | 2,421  | 0,000231 | 0,04908 |
| ENSG00000163536 | <i>SERPINI1</i> | -0,986 | 0,00046  | 0,089554 | -1,001 | 0,000232 | 0,04908 |
| ENSG00000123104 | <i>ITPR2</i>    | -0,827 | 0,00044  | 0,086556 | -0,844 | 0,000232 | 0,04908 |
| ENSG00000172986 | <i>GXYLT2</i>   | -1,075 | 0,00041  | 0,082975 | -1,097 | 0,000233 | 0,04914 |
| ENSG00000197093 | <i>GAL3ST4</i>  | 1,313  | 0,00046  | 0,089384 | 1,369  | 0,000233 | 0,04914 |
| ENSG00000118680 | <i>MYL12B</i>   | 0,774  | 0,00021  | 0,054934 | 0,763  | 0,000249 | 0,05227 |
| ENSG00000160460 | <i>SPTBN4</i>   | -0,946 | 0,00028  | 0,065526 | -0,928 | 0,000251 | 0,05256 |
| ENSG00000106025 | <i>TSPAN12</i>  | -0,835 | 0,00061  | 0,109779 | -0,879 | 0,000253 | 0,05256 |
| ENSG00000182253 | <i>SYNM</i>     | 1,423  | 5,55E-05 | 0,020921 | 1,282  | 0,000258 | 0,05316 |
| ENSG00000250673 | <i>REELD1</i>   | 1,255  | 0,00038  | 0,079125 | 1,282  | 0,000258 | 0,05316 |
| ENSG00000176641 | <i>RNF152</i>   | -1,425 | 0,00056  | 0,104891 | -1,508 | 0,000260 | 0,05335 |
| ENSG00000100097 | <i>LGALS1</i>   | -0,744 | 0,00037  | 0,077129 | -0,759 | 0,000261 | 0,05335 |
| ENSG00000128872 | <i>TMOD2</i>    | -0,847 | 0,00025  | 0,060633 | -0,842 | 0,000264 | 0,05369 |
| ENSG00000167972 | <i>ABCA3</i>    | -0,898 | 0,00080  | 0,130387 | -0,947 | 0,000266 | 0,05396 |
| ENSG00000100146 | <i>SOX10</i>    | 1,521  | 0,00035  | 0,075216 | 1,548  | 0,000268 | 0,05411 |
| ENSG00000107984 | <i>DKK1</i>     | -0,749 | 0,00028  | 0,065526 | -0,750 | 0,000272 | 0,05479 |
| ENSG00000198431 | <i>TXNRD1</i>   | 0,746  | 0,00029  | 0,067565 | 0,749  | 0,000274 | 0,05501 |
| ENSG00000109107 | <i>ALDOC</i>    | 0,803  | 0,00093  | 0,144999 | 0,844  | 0,000276 | 0,05532 |
| ENSG00000198886 | <i>ND4</i>      | 0,748  | 0,00027  | 0,064093 | 0,747  | 0,000279 | 0,05566 |
| ENSG00000065183 | <i>WDR3</i>     | 0,748  | 0,00033  | 0,073642 | 0,755  | 0,000281 | 0,05594 |
| ENSG00000104967 | <i>NOVA2</i>    | -1,377 | 0,00029  | 0,067565 | -1,368 | 0,000284 | 0,05598 |
| ENSG00000120738 | <i>EGR1</i>     | -0,748 | 0,00034  | 0,073642 | -0,757 | 0,000284 | 0,05598 |
| ENSG00000161921 | <i>CXCL16</i>   | -0,877 | 0,00015  | 0,041486 | -0,826 | 0,000286 | 0,05598 |
| ENSG00000151348 | <i>EXT2</i>     | -0,741 | 0,00046  | 0,089279 | -0,764 | 0,000289 | 0,05629 |
| ENSG00000197859 | <i>ADAMTSL2</i> | -1,640 | 0,00043  | 0,085353 | -1,590 | 0,000289 | 0,05629 |
| ENSG00000077274 | <i>CAPN6</i>    | -1,015 | 0,00031  | 0,069848 | -1,006 | 0,000291 | 0,05658 |
| ENSG00000187123 | <i>LYPD6</i>    | -1,018 | 0,00019  | 0,050803 | -0,982 | 0,000304 | 0,05882 |
| ENSG00000164406 | <i>LEAP2</i>    | 0,932  | 0,00055  | 0,102985 | 0,971  | 0,000305 | 0,05882 |
| ENSG00000066117 | <i>SMARCD1</i>  | -0,747 | 0,00039  | 0,080763 | -0,756 | 0,000317 | 0,06096 |
| ENSG00000055163 | <i>CYFIP2</i>   | -0,921 | 0,00013  | 0,037383 | -0,844 | 0,000325 | 0,06208 |
| ENSG00000005486 | <i>RHBDD2</i>   | -0,773 | 0,00034  | 0,074105 | -0,772 | 0,000330 | 0,06302 |
| ENSG00000185650 | <i>ZFP36L1</i>  | -0,743 | 0,00033  | 0,072994 | -0,742 | 0,000336 | 0,06384 |
| ENSG00000198208 | <i>RPS6KL1</i>  | 0,864  | 0,00022  | 0,056161 | 0,836  | 0,000338 | 0,06416 |
| ENSG00000160161 | <i>CILP2</i>    | -0,797 | 0,00034  | 0,074105 | -0,792 | 0,000344 | 0,06466 |
| ENSG00000178297 | <i>TMPRSS9</i>  | 0,965  | 0,00055  | 0,102985 | 0,999  | 0,000344 | 0,06466 |
| ENSG00000100564 | <i>PIGH</i>     | -0,872 | 0,00034  | 0,073642 | -0,855 | 0,000345 | 0,06466 |
| ENSG00000165804 | <i>ZNF219</i>   | -0,838 | 0,00043  | 0,085484 | -0,850 | 0,000346 | 0,06468 |
| ENSG00000170396 | <i>ZNF804A</i>  | -6,310 | 0,00242  | 0,256608 | -6,718 | 0,000352 | 0,06512 |
| ENSG00000156587 | <i>UBE2L6</i>   | -0,907 | 0,00141  | 0,183883 | -0,993 | 0,000353 | 0,06512 |
| ENSG00000001084 | <i>GCLC</i>     | 0,752  | 0,00030  | 0,068318 | 0,741  | 0,000358 | 0,06598 |
| ENSG00000157851 | <i>DPYSL5</i>   | -0,864 | 0,00028  | 0,065526 | -0,832 | 0,000361 | 0,06634 |
| ENSG00000196358 | <i>NTNG2</i>    | -1,303 | 0,00059  | 0,108634 | -1,345 | 0,000363 | 0,06649 |
| ENSG00000198909 | <i>MAP3K3</i>   | -0,793 | 0,00031  | 0,069192 | -0,775 | 0,000372 | 0,06772 |
| ENSG00000109787 | <i>KLF3</i>     | 0,761  | 0,00044  | 0,086713 | 0,769  | 0,000376 | 0,06825 |

|                 |                  |        |          |          |        |          |         |
|-----------------|------------------|--------|----------|----------|--------|----------|---------|
| ENSG0000002745  | <i>WNT16</i>     | -0,755 | 0,00037  | 0,077692 | -0,753 | 0,000379 | 0,06858 |
| ENSG00000254911 | <i>SCARNA9</i>   | -0,955 | 0,00062  | 0,110318 | -0,946 | 0,000385 | 0,06955 |
| ENSG00000172819 | <i>RARG</i>      | 0,793  | 0,00041  | 0,082975 | 0,788  | 0,000388 | 0,06983 |
| ENSG00000237452 | <i>BHMG1</i>     | -0,839 | 0,00020  | 0,051818 | -0,788 | 0,000402 | 0,07222 |
| ENSG00000163884 | <i>KLF15</i>     | -2,312 | 9,83E-05 | 0,031388 | -1,998 | 0,000404 | 0,07239 |
| ENSG00000176723 | <i>ZNF843</i>    | -1,214 | 0,00040  | 0,082975 | -1,180 | 0,000407 | 0,07262 |
| ENSG00000002586 | <i>CD99</i>      | -0,864 | 0,00127  | 0,171908 | -0,815 | 0,000408 | 0,07266 |
| ENSG00000161677 | <i>JOSD2</i>     | -0,841 | 0,00037  | 0,078114 | -0,813 | 0,000421 | 0,07443 |
| ENSG00000186104 | <i>CYP2R1</i>    | -0,759 | 0,00078  | 0,129726 | -0,789 | 0,000429 | 0,07465 |
| ENSG00000112175 | <i>BMP5</i>      | 1,618  | 0,00165  | 0,206277 | 1,760  | 0,000429 | 0,07465 |
| ENSG00000227110 | <i>LMCD1-AS1</i> | -1,364 | 0,00932  | 0,549077 | -1,767 | 0,000429 | 0,07465 |
| ENSG00000122642 | <i>FKBP9</i>     | -0,758 | 0,00041  | 0,083771 | -0,746 | 0,000433 | 0,07478 |
| ENSG00000134762 | <i>DSC3</i>      | -0,830 | 0,00195  | 0,226021 | -0,917 | 0,000434 | 0,07490 |
| ENSG00000139112 | <i>GABARAPL1</i> | -0,743 | 0,00097  | 0,148826 | -0,785 | 0,000441 | 0,07537 |
| ENSG00000038427 | <i>VCAN</i>      | -0,719 | 0,00048  | 0,092164 | -0,723 | 0,000442 | 0,07537 |
| ENSG00000006025 | <i>OSBPL7</i>    | 0,879  | 0,00022  | 0,055468 | 0,822  | 0,000442 | 0,07537 |
| ENSG00000069020 | <i>MAST4</i>     | -1,151 | 0,00342  | 0,310474 | -1,319 | 0,000443 | 0,07537 |
| ENSG00000214402 | <i>LCNL1</i>     | 3,708  | 0,00045  | 0,087750 | 3,712  | 0,000448 | 0,07564 |
| ENSG00000172478 | <i>MAB21L4</i>   | 3,621  | 0,00079  | 0,130387 | 3,712  | 0,000448 | 0,07564 |
| ENSG00000196611 | <i>MMP1</i>      | -3,526 | 0,00444  | 0,367039 | -3,965 | 0,000448 | 0,07564 |
| ENSG00000074047 | <i>GLI2</i>      | -0,976 | 0,00014  | 0,039953 | -0,874 | 0,000460 | 0,07748 |
| ENSG00000189334 | <i>S100A14</i>   | 0,750  | 0,00061  | 0,109779 | 0,759  | 0,000462 | 0,07754 |
| ENSG00000146070 | <i>PLA2G7</i>    | -1,296 | 0,00338  | 0,308675 | -1,322 | 0,000464 | 0,07754 |
| ENSG00000110921 | <i>MVK</i>       | 0,794  | 0,00027  | 0,064093 | 0,757  | 0,000465 | 0,07754 |
| ENSG00000197774 | <i>EME2</i>      | 0,786  | 0,00029  | 0,067095 | 0,759  | 0,000465 | 0,07754 |
| ENSG00000163624 | <i>CDS1</i>      | 0,792  | 0,00058  | 0,107104 | 0,796  | 0,000469 | 0,07772 |
| ENSG00000145244 | <i>CORIN</i>     | 0,782  | 0,00085  | 0,135366 | 0,803  | 0,000480 | 0,07939 |
| ENSG00000204022 | <i>LIPJ</i>      | -2,148 | 0,00076  | 0,128487 | -2,205 | 0,000488 | 0,08032 |
| ENSG00000163344 | <i>PMVK</i>      | -0,862 | 0,00029  | 0,066378 | -0,806 | 0,000499 | 0,08171 |
| ENSG00000263934 | <i>SNORD3A</i>   | -0,660 | 0,00131  | 0,174181 | -0,715 | 0,000501 | 0,08175 |
| ENSG00000264940 | <i>SNORD3C</i>   | -0,666 | 0,00119  | 0,166302 | -0,715 | 0,000502 | 0,08179 |
| ENSG00000109929 | <i>SC5D</i>      | 0,731  | 0,00062  | 0,111600 | 0,741  | 0,000521 | 0,08448 |
| ENSG00000256980 | <i>KHDC1L</i>    | 1,286  | 0,00031  | 0,069094 | 1,203  | 0,000521 | 0,08448 |
| ENSG00000183255 | <i>PTTG1IP</i>   | -0,720 | 0,00058  | 0,107104 | -0,725 | 0,000525 | 0,08494 |
| ENSG00000153234 | <i>NR4A2</i>     | -0,915 | 0,00023  | 0,056383 | -0,847 | 0,000532 | 0,08587 |
| ENSG00000156298 | <i>TSPAN7</i>    | -1,301 | 0,00056  | 0,104958 | -1,294 | 0,000535 | 0,08612 |
| ENSG00000125534 | <i>PPDPF</i>     | -0,735 | 0,00054  | 0,102172 | -0,731 | 0,000543 | 0,08689 |
| ENSG00000141458 | <i>NPC1</i>      | 0,722  | 0,00063  | 0,112899 | 0,728  | 0,000543 | 0,08689 |
| ENSG00000198673 | <i>TFAF2</i>     | -0,917 | 0,00112  | 0,162212 | -0,969 | 0,000546 | 0,08710 |
| ENSG00000185669 | <i>SNAI3</i>     | 1,178  | 0,00083  | 0,134022 | 1,215  | 0,000549 | 0,08724 |
| ENSG00000136888 | <i>ATP6V1G1</i>  | 0,733  | 0,00055  | 0,103635 | 0,729  | 0,000565 | 0,08940 |
| ENSG00000196754 | <i>S100A2</i>    | 0,844  | 0,00094  | 0,145823 | 0,870  | 0,000566 | 0,08940 |
| ENSG00000221676 | <i>RNU6ATAC</i>  | -1,405 | 0,00016  | 0,043998 | -1,042 | 0,000567 | 0,08940 |
| ENSG00000059728 | <i>MXD1</i>      | 0,853  | 0,00035  | 0,075198 | 0,814  | 0,000568 | 0,08940 |
| ENSG00000092096 | <i>SLC22A17</i>  | -0,855 | 0,00264  | 0,268756 | -0,957 | 0,000569 | 0,08940 |
| ENSG00000177383 | <i>MAGEF1</i>    | 0,748  | 0,00064  | 0,114096 | 0,754  | 0,000585 | 0,09134 |
| ENSG00000139445 | <i>FOXN4</i>     | -1,665 | 0,00082  | 0,133354 | -1,600 | 0,000591 | 0,09216 |
| ENSG00000163513 | <i>TGFBR2</i>    | -0,753 | 0,00066  | 0,117380 | -0,754 | 0,000595 | 0,09253 |
| ENSG00000162909 | <i>CAPN2</i>     | -0,692 | 0,00085  | 0,135366 | -0,710 | 0,000602 | 0,09315 |
| ENSG00000198763 | <i>ND2</i>       | 0,726  | 0,00041  | 0,083771 | 0,704  | 0,000604 | 0,09315 |
| ENSG00000089327 | <i>FXYS5</i>     | -0,830 | 0,00042  | 0,084164 | -0,787 | 0,000605 | 0,09315 |
| ENSG00000020181 | <i>ADGRA2</i>    | -0,824 | 0,00091  | 0,143633 | -0,833 | 0,000606 | 0,09315 |
| ENSG00000100116 | <i>GCAT</i>      | -0,763 | 0,00050  | 0,095040 | -0,743 | 0,000608 | 0,09322 |
| ENSG00000155660 | <i>PDIA4</i>     | -0,731 | 0,00041  | 0,082975 | -0,707 | 0,000619 | 0,09446 |
| ENSG00000221890 | <i>NPTXR</i>     | -0,829 | 0,00050  | 0,095722 | -0,811 | 0,000631 | 0,09607 |
| ENSG00000183250 | <i>LINC01547</i> | -1,004 | 0,00077  | 0,129102 | -0,995 | 0,000641 | 0,09726 |



|                 |                  |        |          |          |        |          |         |
|-----------------|------------------|--------|----------|----------|--------|----------|---------|
| ENSG00000197444 | <i>OGDHL</i>     | -0,935 | 0,00081  | 0,131620 | -0,904 | 0,000643 | 0,09737 |
| ENSG00000170464 | <i>DNAJC18</i>   | -0,921 | 0,00059  | 0,107893 | -0,890 | 0,000650 | 0,09829 |
| ENSG00000139508 | <i>SLC46A3</i>   | -0,935 | 0,00821  | 0,523212 | -1,160 | 0,000662 | 0,09986 |
| ENSG00000280997 | <i>CCAT2</i>     | -6,596 | 0,00067  | 0,117489 | -6,594 | 0,000667 | 0,10031 |
| ENSG00000138685 | <i>FGF2</i>      | -0,778 | 0,00069  | 0,121106 | -0,776 | 0,000684 | 0,10240 |
| ENSG00000183696 | <i>UPP1</i>      | 0,712  | 0,00071  | 0,121539 | 0,710  | 0,000700 | 0,10457 |
| ENSG00000109472 | <i>CPE</i>       | -0,664 | 0,00252  | 0,262271 | -0,736 | 0,000705 | 0,10507 |
| ENSG00000158406 | <i>H4C8</i>      | -0,702 | 0,00087  | 0,137564 | -0,713 | 0,000715 | 0,10630 |
| ENSG00000198695 | <i>ND6</i>       | 0,716  | 0,00051  | 0,096310 | 0,696  | 0,000717 | 0,10635 |
| ENSG00000184076 | <i>UQCR10</i>    | -0,731 | 0,00094  | 0,145823 | -0,738 | 0,000737 | 0,10843 |
| ENSG00000099194 | <i>SCD</i>       | 0,697  | 0,00070  | 0,121493 | 0,692  | 0,000763 | 0,11160 |
| ENSG00000135048 | <i>CEMIP2</i>    | -0,702 | 0,00211  | 0,236599 | -0,759 | 0,000781 | 0,11373 |
| ENSG00000177494 | <i>ZBED2</i>     | -0,746 | 0,00067  | 0,117489 | -0,737 | 0,000790 | 0,11449 |
| ENSG00000067715 | <i>SYT1</i>      | -0,742 | 0,00156  | 0,196920 | -0,781 | 0,000792 | 0,11449 |
| ENSG00000171658 | <i>NMRAL2P</i>   | 3,621  | 0,00079  | 0,130387 | 3,625  | 0,000795 | 0,11449 |
| ENSG00000165801 | <i>ARHGEF40</i>  | -0,905 | 0,00093  | 0,144999 | -0,889 | 0,000803 | 0,11504 |
| ENSG00000139636 | <i>LMBR1L</i>    | -0,706 | 0,00218  | 0,242382 | -0,766 | 0,000804 | 0,11504 |
| ENSG00000162551 | <i>ALPL</i>      | -2,084 | 0,00182  | 0,218057 | -2,045 | 0,000820 | 0,11685 |
| ENSG00000049130 | <i>KITLG</i>     | -0,705 | 0,00064  | 0,113509 | -0,690 | 0,000820 | 0,11685 |
| ENSG00000158711 | <i>ELK4</i>      | 0,700  | 0,00079  | 0,130387 | 0,697  | 0,000826 | 0,11734 |
| ENSG00000116852 | <i>KIF21B</i>    | -0,716 | 0,00348  | 0,313575 | -0,800 | 0,000829 | 0,11734 |
| ENSG00000142552 | <i>RCN3</i>      | -1,699 | 3,67E-05 | 0,015172 | -1,153 | 0,000829 | 0,11734 |
| ENSG00000175197 | <i>DDIT3</i>     | -0,782 | 0,00072  | 0,121998 | -0,771 | 0,000832 | 0,11753 |
| ENSG00000122958 | <i>VPS26A</i>    | 0,695  | 0,00117  | 0,166302 | 0,710  | 0,000835 | 0,11770 |
| ENSG00000127946 | <i>HIP1</i>      | -0,696 | 0,00124  | 0,169037 | -0,712 | 0,000855 | 0,12027 |
| ENSG00000172893 | <i>DHCR7</i>     | 0,691  | 0,00100  | 0,151774 | 0,697  | 0,000870 | 0,12212 |
| ENSG00000164509 | <i>IL31RA</i>    | 3,133  | 2,53E-05 | 0,011002 | 1,990  | 0,000878 | 0,12252 |
| ENSG00000135108 | <i>FBXO21</i>    | -0,687 | 0,00122  | 0,168412 | -0,704 | 0,000879 | 0,12252 |
| ENSG00000245680 | <i>ZNF585B</i>   | -0,738 | 0,00256  | 0,264255 | -0,794 | 0,000883 | 0,12279 |
| ENSG00000268223 | <i>ARL14EPL</i>  | -0,763 | 0,00216  | 0,240710 | -0,817 | 0,000889 | 0,12309 |
| ENSG00000101000 | <i>PROCR</i>     | -0,777 | 0,00147  | 0,191022 | -0,799 | 0,000892 | 0,12309 |
| ENSG00000196632 | <i>WNK3</i>      | -1,216 | 0,00029  | 0,066932 | -1,050 | 0,000894 | 0,12309 |
| ENSG00000088340 | <i>FER1L4</i>    | 0,973  | 0,00034  | 0,073642 | 0,876  | 0,000896 | 0,12309 |
| ENSG00000104738 | <i>MCM4</i>      | 0,664  | 0,00139  | 0,181436 | 0,689  | 0,000896 | 0,12309 |
| ENSG00000163623 | <i>NKX6-1</i>    | -1,211 | 0,00076  | 0,128150 | -1,139 | 0,000902 | 0,12370 |
| ENSG00000154007 | <i>ASB17</i>     | 2,458  | 0,00149  | 0,191813 | 2,532  | 0,000911 | 0,12418 |
| ENSG00000090530 | <i>P3H2</i>      | -2,283 | 0,00243  | 0,256608 | -2,439 | 0,000911 | 0,12418 |
| ENSG00000203760 | <i>CENPW</i>     | -0,773 | 0,00095  | 0,147059 | -0,764 | 0,000912 | 0,12418 |
| ENSG00000115963 | <i>RND3</i>      | 0,761  | 0,00059  | 0,107921 | 0,728  | 0,000931 | 0,12652 |
| ENSG00000176919 | <i>C8G</i>       | -1,230 | 0,00292  | 0,284135 | -1,275 | 0,000964 | 0,13000 |
| ENSG00000177606 | <i>JUN</i>       | 0,691  | 0,00095  | 0,147059 | 0,690  | 0,000971 | 0,13065 |
| ENSG00000180901 | <i>KCTD2</i>     | -0,688 | 0,00124  | 0,169037 | -0,701 | 0,000975 | 0,13089 |
| ENSG00000067798 | <i>NAV3</i>      | 0,689  | 0,00117  | 0,166302 | 0,696  | 0,000990 | 0,13262 |
| ENSG00000176826 | <i>FKBP9P1</i>   | -0,639 | 0,00942  | 0,553283 | -0,736 | 0,000992 | 0,13262 |
| ENSG00000156299 | <i>TIAM1</i>     | -0,711 | 0,00150  | 0,193060 | -0,729 | 0,000997 | 0,13262 |
| ENSG00000225791 | <i>TRAM2-AS1</i> | -1,022 | 0,00124  | 0,169037 | -1,036 | 0,000998 | 0,13262 |
| ENSG00000099822 | <i>HCN2</i>      | -0,872 | 0,00093  | 0,144999 | -0,846 | 0,001006 | 0,13313 |
| ENSG00000168646 | <i>AXIN2</i>     | -0,715 | 0,00186  | 0,221297 | -0,749 | 0,001014 | 0,13336 |
| ENSG00000177628 | <i>GBA</i>       | -0,717 | 0,00199  | 0,228792 | -0,703 | 0,001015 | 0,13336 |
| ENSG00000233276 | <i>GPX1</i>      | -0,673 | 0,00130  | 0,174109 | -0,686 | 0,001016 | 0,13336 |
| ENSG00000185090 | <i>MANEAL</i>    | -0,742 | 0,00110  | 0,161087 | -0,738 | 0,001020 | 0,13359 |
| ENSG00000179674 | <i>ARL14</i>     | 1,304  | 0,00102  | 0,153684 | 1,308  | 0,001024 | 0,13385 |
| ENSG00000130066 | <i>SAT1</i>      | 0,698  | 0,00082  | 0,133631 | 0,684  | 0,001028 | 0,13395 |
| ENSG00000154957 | <i>ZNF18</i>     | -0,799 | 0,00097  | 0,148826 | -0,779 | 0,001050 | 0,13571 |
| ENSG00000171227 | <i>TMEM37</i>    | -1,060 | 0,00151  | 0,193134 | -1,089 | 0,001054 | 0,13571 |
| ENSG00000115540 | <i>MOB4</i>      | -0,755 | 0,00082  | 0,132960 | -0,737 | 0,001055 | 0,13571 |

|                 |                   |        |         |          |        |          |         |
|-----------------|-------------------|--------|---------|----------|--------|----------|---------|
| ENSG00000139344 | <i>AMDHD1</i>     | -0,858 | 0,00466 | 0,376404 | -0,973 | 0,001057 | 0,13571 |
| ENSG00000257596 | <i>SCAT2</i>      | 1,073  | 0,00106 | 0,156827 | 1,047  | 0,001057 | 0,13571 |
| ENSG00000181481 | <i>RNF135</i>     | -0,838 | 0,00115 | 0,165378 | -0,830 | 0,001064 | 0,13638 |
| ENSG00000154511 | <i>DIPK1A</i>     | -0,837 | 0,00101 | 0,152510 | -0,829 | 0,001072 | 0,13705 |
| ENSG00000212907 | <i>ND4L</i>       | 0,677  | 0,00100 | 0,151645 | 0,672  | 0,001088 | 0,13866 |
| ENSG00000153029 | <i>MR1</i>        | -0,751 | 0,00166 | 0,207352 | -0,771 | 0,001096 | 0,13938 |
| ENSG00000139597 | <i>N4BP2L1</i>    | 1,222  | 0,00058 | 0,107104 | 1,130  | 0,001100 | 0,13957 |
| ENSG00000154645 | <i>CHODL</i>      | -1,086 | 0,00079 | 0,130387 | -1,025 | 0,001108 | 0,14027 |
| ENSG00000182771 | <i>GRID1</i>      | -0,991 | 0,00224 | 0,247113 | -1,028 | 0,001114 | 0,14055 |
| ENSG00000079150 | <i>FKBP7</i>      | -0,872 | 0,00196 | 0,227191 | -0,891 | 0,001119 | 0,14089 |
| ENSG00000251791 | <i>SCARNA6</i>    | -0,725 | 0,00454 | 0,372911 | -0,754 | 0,001130 | 0,14142 |
| ENSG00000156463 | <i>SH3RF2</i>     | 0,747  | 0,00068 | 0,119741 | 0,710  | 0,001138 | 0,14190 |
| ENSG00000136267 | <i>DGKB</i>       | -2,196 | 0,00394 | 0,339218 | -3,146 | 0,001188 | 0,14666 |
| ENSG00000166794 | <i>PPIB</i>       | -0,692 | 0,00109 | 0,159863 | -0,683 | 0,001192 | 0,14693 |
| ENSG00000113356 | <i>POLR3G</i>     | 0,648  | 0,00209 | 0,235392 | 0,680  | 0,001198 | 0,14737 |
| ENSG00000252010 | <i>SCARNA5</i>    | -0,637 | 0,00607 | 0,442616 | -0,710 | 0,001205 | 0,14767 |
| ENSG00000129538 | <i>RNASE1</i>     | 0,849  | 0,00205 | 0,231989 | 0,890  | 0,001208 | 0,14774 |
| ENSG00000158615 | <i>PPP1R15B</i>   | 0,670  | 0,00124 | 0,169279 | 0,671  | 0,001213 | 0,14778 |
| ENSG00000251562 | <i>MALAT1</i>     | 0,665  | 0,00118 | 0,166302 | 0,664  | 0,001215 | 0,14778 |
| ENSG00000089169 | <i>RPH3A</i>      | -2,212 | 0,00023 | 0,057074 | -1,721 | 0,001222 | 0,14778 |
| ENSG00000164220 | <i>F2RL2</i>      | 1,718  | 0,00122 | 0,168412 | 1,722  | 0,001222 | 0,14778 |
| ENSG00000127324 | <i>TSPAN8</i>     | -2,204 | 0,00170 | 0,210080 | -1,987 | 0,001245 | 0,15037 |
| ENSG00000166147 | <i>FBN1</i>       | 0,968  | 0,00155 | 0,196790 | 0,951  | 0,001252 | 0,15073 |
| ENSG00000117533 | <i>VAMP4</i>      | -0,802 | 0,00069 | 0,120029 | -0,754 | 0,001255 | 0,15073 |
| ENSG00000143515 | <i>ATP8B2</i>     | -0,654 | 0,00266 | 0,269022 | -0,695 | 0,001255 | 0,15073 |
| ENSG00000157315 | <i>TMED6</i>      | 1,086  | 0,00134 | 0,176284 | 1,083  | 0,001261 | 0,15089 |
| ENSG00000173868 | <i>PHOSPHO1</i>   | -1,372 | 0,00225 | 0,248636 | -1,435 | 0,001266 | 0,15089 |
| ENSG00000174776 | <i>WDR49</i>      | 1,306  | 0,00932 | 0,549077 | 1,500  | 0,001266 | 0,15089 |
| ENSG00000147041 | <i>SYTL5</i>      | 6,365  | 0,00242 | 0,256608 | 6,491  | 0,001268 | 0,15089 |
| ENSG00000227409 | <i>ZMYM4-AS1</i>  | -1,917 | 0,00128 | 0,172554 | -1,913 | 0,001280 | 0,15146 |
| ENSG00000172671 | <i>ZFAND4</i>     | -0,732 | 0,00117 | 0,166302 | -0,719 | 0,001293 | 0,15269 |
| ENSG00000083844 | <i>ZNF264</i>     | 0,694  | 0,00112 | 0,162212 | 0,683  | 0,001303 | 0,15362 |
| ENSG00000111962 | <i>UST</i>        | -0,881 | 0,00194 | 0,225542 | -0,893 | 0,001306 | 0,15364 |
| ENSG00000246705 | <i>H2AJ</i>       | 1,177  | 0,00316 | 0,297099 | 1,265  | 0,001308 | 0,15364 |
| ENSG00000187134 | <i>AKR1C1</i>     | 1,343  | 0,00692 | 0,472689 | 1,375  | 0,001312 | 0,15387 |
| ENSG00000115657 | <i>ABCB6</i>      | 0,831  | 0,00112 | 0,162212 | 0,820  | 0,001330 | 0,15510 |
| ENSG00000119922 | <i>IFIT2</i>      | -1,497 | 0,00104 | 0,155576 | -1,445 | 0,001339 | 0,15588 |
| ENSG00000183340 | <i>JRKL</i>       | 0,759  | 0,00133 | 0,175633 | 0,758  | 0,001350 | 0,15682 |
| ENSG00000187984 | <i>ANKRD19P</i>   | 0,692  | 0,00156 | 0,197618 | 0,692  | 0,001354 | 0,15682 |
| ENSG00000239264 | <i>TXNDC5</i>     | -0,822 | 0,00180 | 0,218057 | -0,839 | 0,001373 | 0,15849 |
| ENSG00000081189 | <i>MEF2C</i>      | 0,690  | 0,00174 | 0,212332 | 0,702  | 0,001375 | 0,15849 |
| ENSG00000132256 | <i>TRIM5</i>      | -0,691 | 0,00337 | 0,308675 | -0,752 | 0,001378 | 0,15849 |
| ENSG00000197106 | <i>SLC6A17</i>    | -0,724 | 0,00106 | 0,157007 | -0,704 | 0,001381 | 0,15849 |
| ENSG00000137767 | <i>SQOR</i>       | -1,075 | 0,00041 | 0,082975 | -0,951 | 0,001384 | 0,15849 |
| ENSG00000069812 | <i>HES2</i>       | -0,774 | 0,00189 | 0,221984 | -0,792 | 0,001386 | 0,15849 |
| ENSG00000115884 | <i>SDC1</i>       | -0,755 | 0,00076 | 0,128760 | -0,715 | 0,001386 | 0,15849 |
| ENSG00000066629 | <i>EML1</i>       | -0,852 | 0,00070 | 0,121338 | -0,769 | 0,001399 | 0,15966 |
| ENSG00000110042 | <i>DTX4</i>       | -3,764 | 0,00141 | 0,183883 | -3,760 | 0,001410 | 0,16015 |
| ENSG00000118473 | <i>SGIP1</i>      | -1,017 | 0,00294 | 0,284228 | -1,060 | 0,001417 | 0,16062 |
| ENSG00000152332 | <i>UHMK1</i>      | 0,669  | 0,00122 | 0,168412 | 0,660  | 0,001433 | 0,16216 |
| ENSG00000163491 | <i>NEK10</i>      | 0,947  | 0,00035 | 0,074206 | 0,809  | 0,001454 | 0,16429 |
| ENSG00000171889 | <i>MIR31HG</i>    | -1,028 | 0,00149 | 0,191882 | -1,021 | 0,001473 | 0,16515 |
| ENSG00000196505 | <i>GDAP2</i>      | -0,685 | 0,00144 | 0,187405 | -0,680 | 0,001483 | 0,16515 |
| ENSG00000160862 | <i>AZGP1</i>      | -2,959 | 0,00339 | 0,308675 | -2,761 | 0,001488 | 0,16515 |
| ENSG00000184005 | <i>ST6GALNAC3</i> | -1,396 | 0,00278 | 0,274733 | -1,470 | 0,001492 | 0,16515 |
| ENSG00000186115 | <i>CYP4F2</i>     | 1,805  | 0,00904 | 0,545404 | 1,521  | 0,001492 | 0,16515 |

|                 |                  |        |         |          |        |          |         |
|-----------------|------------------|--------|---------|----------|--------|----------|---------|
| ENSG00000167005 | <i>NUDT21</i>    | -0,673 | 0,00126 | 0,171212 | -0,662 | 0,001504 | 0,16607 |
| ENSG00000133121 | <i>STARD13</i>   | -0,831 | 0,00205 | 0,232248 | -0,845 | 0,001516 | 0,16712 |
| ENSG00000197763 | <i>TXNRD3</i>    | -0,819 | 0,00130 | 0,173646 | -0,786 | 0,001536 | 0,16883 |
| ENSG00000138175 | <i>ARL3</i>      | -0,648 | 0,00484 | 0,388170 | -0,710 | 0,001554 | 0,17017 |
| ENSG00000244187 | <i>TMEM141</i>   | -0,715 | 0,00251 | 0,261176 | -0,749 | 0,001562 | 0,17076 |
| ENSG00000132589 | <i>FLOT2</i>     | -0,621 | 0,00359 | 0,320056 | -0,671 | 0,001575 | 0,17196 |
| ENSG00000166123 | <i>GPT2</i>      | -0,713 | 0,00121 | 0,168412 | -0,689 | 0,001589 | 0,17214 |
| ENSG00000066654 | <i>THUMPD1</i>   | 0,667  | 0,00153 | 0,195561 | 0,663  | 0,001589 | 0,17214 |
| ENSG00000131652 | <i>THOC6</i>     | -0,681 | 0,00218 | 0,242448 | -0,685 | 0,001593 | 0,17214 |
| ENSG00000179163 | <i>FUCA1</i>     | -0,677 | 0,00550 | 0,419266 | -0,752 | 0,001596 | 0,17214 |
| ENSG00000215256 | <i>DHRS4-AS1</i> | -0,755 | 0,00738 | 0,489937 | -0,774 | 0,001608 | 0,17266 |
| ENSG00000176102 | <i>CSTF3</i>     | 0,663  | 0,00173 | 0,211846 | 0,662  | 0,001612 | 0,17273 |
| ENSG00000075891 | <i>PAX2</i>      | -1,098 | 0,00331 | 0,306180 | -1,164 | 0,001621 | 0,17317 |
| ENSG00000246922 | <i>UBAP1L</i>    | 0,715  | 0,00129 | 0,173001 | 0,700  | 0,001629 | 0,17357 |
| ENSG00000078401 | <i>EDN1</i>      | -1,028 | 0,00541 | 0,417198 | -1,149 | 0,001630 | 0,17357 |
| ENSG00000119121 | <i>TRPM6</i>     | -0,864 | 0,00155 | 0,196920 | -0,825 | 0,001648 | 0,17514 |
| ENSG00000184164 | <i>CRELD2</i>    | -0,700 | 0,00189 | 0,221984 | -0,692 | 0,001654 | 0,17536 |
| ENSG00000121064 | <i>SCPEP1</i>    | -0,693 | 0,00243 | 0,256687 | -0,703 | 0,001655 | 0,17536 |
| ENSG00000111052 | <i>LIN7A</i>     | -0,953 | 0,00324 | 0,301965 | -1,012 | 0,001663 | 0,17585 |
| ENSG00000130164 | <i>LDLR</i>      | 0,657  | 0,00155 | 0,196790 | 0,651  | 0,001674 | 0,17650 |
| ENSG00000140948 | <i>ZCCHC14</i>   | -0,646 | 0,00204 | 0,231739 | -0,657 | 0,001681 | 0,17696 |
| ENSG00000140941 | <i>MAP1LC3B</i>  | -0,717 | 0,00071 | 0,121539 | -0,661 | 0,001684 | 0,17701 |
| ENSG00000144591 | <i>GMPPA</i>     | -0,619 | 0,00456 | 0,372977 | -0,674 | 0,001730 | 0,17902 |
| ENSG00000118922 | <i>KLF12</i>     | -0,778 | 0,00182 | 0,218057 | -0,779 | 0,001732 | 0,17902 |
| ENSG00000159753 | <i>CARMIL2</i>   | -0,709 | 0,00287 | 0,280962 | -0,724 | 0,001733 | 0,17902 |
| ENSG00000170175 | <i>CHRNA1</i>    | -0,832 | 0,00696 | 0,472704 | -0,796 | 0,001742 | 0,17902 |
| ENSG00000166349 | <i>RAG1</i>      | -1,190 | 0,00123 | 0,168412 | -1,147 | 0,001745 | 0,17902 |
| ENSG0000025423  | <i>HSD17B6</i>   | -0,939 | 0,00364 | 0,322153 | -0,984 | 0,001770 | 0,18068 |
| ENSG00000008513 | <i>ST3GAL1</i>   | -0,750 | 0,00171 | 0,211303 | -0,739 | 0,001777 | 0,18114 |
| ENSG00000188107 | <i>EYS</i>       | 0,790  | 0,00132 | 0,174687 | 0,770  | 0,001780 | 0,18116 |
| ENSG00000065717 | <i>TLE2</i>      | -0,646 | 0,00433 | 0,361448 | -0,689 | 0,001806 | 0,18251 |
| ENSG00000226710 | <i>SNHG32</i>    | -0,691 | 0,00187 | 0,221520 | -0,649 | 0,001807 | 0,18251 |
| ENSG00000136295 | <i>TTYH3</i>     | -0,653 | 0,00273 | 0,272588 | -0,677 | 0,001842 | 0,18406 |
| ENSG00000196277 | <i>GRM7</i>      | -1,182 | 0,00232 | 0,252112 | -1,160 | 0,001863 | 0,18539 |
| ENSG00000110324 | <i>IL10RA</i>    | -1,151 | 0,00174 | 0,212332 | -1,132 | 0,001864 | 0,18539 |
| ENSG00000169239 | <i>CA5B</i>      | -0,758 | 0,00262 | 0,268087 | -0,752 | 0,001884 | 0,18666 |
| ENSG00000117899 | <i>MESD</i>      | -0,632 | 0,00274 | 0,272588 | -0,654 | 0,001885 | 0,18666 |
| ENSG00000012171 | <i>SEMA3B</i>    | 0,819  | 0,00181 | 0,218057 | 0,789  | 0,001900 | 0,18755 |
| ENSG00000207008 | <i>SNORA54</i>   | -0,988 | 0,00407 | 0,347000 | -0,844 | 0,001907 | 0,18760 |
| ENSG00000198910 | <i>L1CAM</i>     | -0,666 | 0,00404 | 0,345342 | -0,698 | 0,001915 | 0,18804 |
| ENSG00000173218 | <i>VANGL1</i>    | -0,695 | 0,00119 | 0,166596 | -0,663 | 0,001917 | 0,18804 |
| ENSG00000081041 | <i>CXCL2</i>     | -1,137 | 0,00921 | 0,546800 | -1,282 | 0,001921 | 0,18805 |
| ENSG00000128266 | <i>GNAZ</i>      | -0,895 | 0,00084 | 0,135270 | -0,829 | 0,001923 | 0,18805 |
| ENSG00000092871 | <i>RFFL</i>      | 0,645  | 0,00319 | 0,298668 | 0,675  | 0,001955 | 0,19089 |
| ENSG00000163734 | <i>CXCL3</i>     | -1,299 | 0,00366 | 0,323163 | -1,355 | 0,001961 | 0,19120 |
| ENSG00000248508 | <i>SRP14-AS1</i> | 0,883  | 0,00132 | 0,174687 | 0,829  | 0,002001 | 0,19419 |
| ENSG00000111981 | <i>ULBP1</i>     | -0,817 | 0,00062 | 0,110318 | -0,722 | 0,002016 | 0,19541 |
| ENSG00000105976 | <i>MET</i>       | -0,630 | 0,00247 | 0,260117 | -0,642 | 0,002022 | 0,19563 |
| ENSG00000168026 | <i>TTC21A</i>    | -0,786 | 0,00419 | 0,354973 | -0,814 | 0,002028 | 0,19592 |
| ENSG00000277449 | <i>CEBPB-AS1</i> | 1,484  | 0,00204 | 0,231739 | 1,488  | 0,002039 | 0,19647 |
| ENSG00000140511 | <i>HAPLN3</i>    | -0,917 | 0,00721 | 0,483267 | -0,991 | 0,002046 | 0,19651 |
| ENSG00000140465 | <i>CYP1A1</i>    | 0,867  | 0,00505 | 0,398029 | 0,916  | 0,002064 | 0,19768 |
| ENSG00000139998 | <i>RAB15</i>     | -0,684 | 0,00368 | 0,324297 | -0,721 | 0,002070 | 0,19794 |
| ENSG00000064652 | <i>SNX24</i>     | -0,862 | 0,00071 | 0,121539 | -0,754 | 0,002097 | 0,20000 |
| ENSG00000165655 | <i>ZNF503</i>    | -0,676 | 0,00214 | 0,238693 | -0,677 | 0,002098 | 0,20000 |
| ENSG00000130724 | <i>CHMP2A</i>    | -0,690 | 0,00133 | 0,176220 | -0,657 | 0,002130 | 0,20275 |

|                 |                     |        |         |          |        |          |         |
|-----------------|---------------------|--------|---------|----------|--------|----------|---------|
| ENSG00000217801 | <i>LOC100288175</i> | 0,832  | 0,00441 | 0,365118 | 0,874  | 0,002159 | 0,20512 |
| ENSG00000135924 | <i>DNAJB2</i>       | -0,684 | 0,00173 | 0,211846 | -0,664 | 0,002161 | 0,20512 |
| ENSG00000164211 | <i>STARD4</i>       | 0,633  | 0,00273 | 0,272588 | 0,647  | 0,002164 | 0,20512 |
| ENSG00000108387 | <i>SEPTIN4</i>      | -0,876 | 0,00187 | 0,221520 | -0,840 | 0,002173 | 0,20565 |
| ENSG00000073792 | <i>IGF2BP2</i>      | -0,634 | 0,00248 | 0,260530 | -0,639 | 0,002199 | 0,20782 |
| ENSG00000255150 | <i>EID3</i>         | 0,703  | 0,00248 | 0,260665 | 0,707  | 0,002239 | 0,21129 |
| ENSG00000167535 | <i>CACNB3</i>       | -0,699 | 0,00312 | 0,294543 | -0,712 | 0,002247 | 0,21177 |
| ENSG00000140931 | <i>CMTM3</i>        | -0,645 | 0,00332 | 0,306208 | -0,669 | 0,002256 | 0,21199 |
| ENSG00000132196 | <i>HSD17B7</i>      | 0,679  | 0,00388 | 0,336538 | 0,687  | 0,002262 | 0,21212 |
| ENSG00000110756 | <i>HPS5</i>         | 0,632  | 0,00295 | 0,284475 | 0,646  | 0,002264 | 0,21212 |
| ENSG00000139372 | <i>TDG</i>          | 0,675  | 0,00170 | 0,210218 | 0,646  | 0,002291 | 0,21302 |
| ENSG00000154553 | <i>PDLIM3</i>       | -0,655 | 0,00447 | 0,368468 | -0,702 | 0,002293 | 0,21302 |
| ENSG00000196159 | <i>FAT4</i>         | -1,611 | 0,00229 | 0,250743 | -1,607 | 0,002293 | 0,21302 |
| ENSG00000141179 | <i>PCTP</i>         | -0,661 | 0,00669 | 0,463358 | -0,727 | 0,002321 | 0,21532 |
| ENSG00000171617 | <i>ENC1</i>         | 0,898  | 0,00160 | 0,200695 | 0,848  | 0,002343 | 0,21668 |
| ENSG00000179361 | <i>ARID3B</i>       | 0,733  | 0,00114 | 0,164734 | 0,670  | 0,002347 | 0,21681 |
| ENSG00000112320 | <i>SOBP</i>         | -0,730 | 0,00179 | 0,216765 | -0,701 | 0,002354 | 0,21686 |
| ENSG00000134352 | <i>IL6ST</i>        | -0,635 | 0,00295 | 0,284475 | -0,646 | 0,002355 | 0,21686 |
| ENSG00000102057 | <i>KCND1</i>        | 0,691  | 0,00318 | 0,298646 | 0,709  | 0,002363 | 0,21705 |
| ENSG00000254206 | <i>NPIPB11</i>      | 0,620  | 0,00904 | 0,545404 | 0,647  | 0,002380 | 0,21822 |
| ENSG00000178695 | <i>KCTD12</i>       | -1,015 | 0,00239 | 0,256608 | -1,010 | 0,002390 | 0,21890 |
| ENSG00000087245 | <i>MMP2</i>         | -6,310 | 0,00242 | 0,256608 | -6,308 | 0,002421 | 0,21898 |
| ENSG00000240057 | <i>LOC107986114</i> | 3,790  | 0,00025 | 0,060633 | 2,389  | 0,002426 | 0,21898 |
| ENSG00000128610 | <i>FEZF1</i>        | -2,283 | 0,00243 | 0,256608 | -2,279 | 0,002426 | 0,21898 |
| ENSG00000197147 | <i>LRRC8B</i>       | -0,629 | 0,00297 | 0,285132 | -0,641 | 0,002428 | 0,21898 |
| ENSG00000074211 | <i>PPP2R2C</i>      | -0,660 | 0,00281 | 0,276782 | -0,668 | 0,002439 | 0,21961 |
| ENSG00000174871 | <i>CNIH2</i>        | -1,006 | 0,00657 | 0,460021 | -1,108 | 0,002446 | 0,21995 |
| ENSG00000176239 | <i>OR51B6</i>       | 0,734  | 0,00322 | 0,300519 | 0,748  | 0,002468 | 0,22073 |
| ENSG00000213901 | <i>SLC23A3</i>      | 1,114  | 0,00306 | 0,290952 | 1,138  | 0,002481 | 0,22073 |
| ENSG00000095596 | <i>CYP26A1</i>      | 3,210  | 0,00788 | 0,507885 | 3,434  | 0,002504 | 0,22147 |
| ENSG00000125741 | <i>OPA3</i>         | 0,686  | 0,00175 | 0,212332 | 0,660  | 0,002525 | 0,22305 |
| ENSG00000101115 | <i>SALL4</i>        | 0,919  | 0,00568 | 0,429149 | 0,986  | 0,002569 | 0,22570 |
| ENSG00000196352 | <i>CD55</i>         | 0,628  | 0,00310 | 0,293084 | 0,636  | 0,002591 | 0,22730 |
| ENSG00000119541 | <i>VPS4B</i>        | 0,657  | 0,00199 | 0,229152 | 0,637  | 0,002602 | 0,22775 |
| ENSG00000131969 | <i>ABHD12B</i>      | 0,760  | 0,00289 | 0,281845 | 0,765  | 0,002603 | 0,22775 |
| ENSG00000086619 | <i>ERO1B</i>        | -0,801 | 0,00626 | 0,451791 | -0,843 | 0,002623 | 0,22885 |
| ENSG00000134901 | <i>POGLUT2</i>      | -0,743 | 0,00253 | 0,262892 | -0,718 | 0,002632 | 0,22940 |
| ENSG00000158292 | <i>GPR153</i>       | -0,920 | 0,00167 | 0,207600 | -0,876 | 0,002640 | 0,22974 |
| ENSG00000187498 | <i>COL4A1</i>       | 2,377  | 0,00182 | 0,218057 | 1,756  | 0,002661 | 0,22993 |
| ENSG00000074370 | <i>ATP2A3</i>       | -0,682 | 0,00621 | 0,449675 | -0,732 | 0,002663 | 0,22993 |
| ENSG00000250748 | <i>LOC105369187</i> | -0,879 | 0,00376 | 0,328910 | -0,907 | 0,002672 | 0,22994 |
| ENSG00000005059 | <i>MCUB</i>         | -0,644 | 0,00535 | 0,414084 | -0,684 | 0,002674 | 0,22994 |
| ENSG00000234028 | <i>EIF2AK3-DT</i>   | -1,138 | 0,00250 | 0,261176 | -1,117 | 0,002674 | 0,22994 |
| ENSG00000134107 | <i>BHLHE40</i>      | 0,636  | 0,00259 | 0,266198 | 0,633  | 0,002688 | 0,23053 |
| ENSG00000185269 | <i>NOTUM</i>        | -0,766 | 0,00703 | 0,476479 | -0,823 | 0,002702 | 0,23143 |
| ENSG00000135622 | <i>SEMA4F</i>       | -0,681 | 0,00298 | 0,285277 | -0,677 | 0,002730 | 0,23351 |
| ENSG00000197405 | <i>C5AR1</i>        | 0,902  | 0,00221 | 0,244414 | 0,846  | 0,002754 | 0,23528 |
| ENSG00000180113 | <i>TDRD6</i>        | -0,909 | 0,00191 | 0,223145 | -0,871 | 0,002787 | 0,23773 |
| ENSG00000162430 | <i>SELENON</i>      | -0,610 | 0,00389 | 0,336578 | -0,630 | 0,002796 | 0,23819 |
| ENSG00000236756 | <i>DNAJC9-AS1</i>   | 1,125  | 0,00331 | 0,306180 | 1,108  | 0,002837 | 0,24044 |
| ENSG00000106799 | <i>TGFBR1</i>       | -0,649 | 0,00250 | 0,261176 | -0,639 | 0,002853 | 0,24121 |
| ENSG00000147383 | <i>NSDHL</i>        | 0,640  | 0,00361 | 0,320056 | 0,651  | 0,002864 | 0,24176 |
| ENSG00000186907 | <i>RTN4RL2</i>      | -0,715 | 0,00547 | 0,419173 | -0,759 | 0,002922 | 0,24597 |
| ENSG00000053747 | <i>LAMA3</i>        | 0,721  | 0,00204 | 0,231739 | 0,678  | 0,002925 | 0,24597 |
| ENSG00000196923 | <i>PDLIM7</i>       | 0,634  | 0,00292 | 0,284135 | 0,629  | 0,002946 | 0,24738 |
| ENSG00000198576 | <i>ARC</i>          | -0,732 | 0,00261 | 0,267402 | -0,714 | 0,002956 | 0,24790 |

|                 |                     |        |         |          |        |          |         |
|-----------------|---------------------|--------|---------|----------|--------|----------|---------|
| ENSG00000285280 | <i>LOC105371664</i> | 0,695  | 0,00329 | 0,306020 | 0,696  | 0,003001 | 0,25077 |
| ENSG00000272886 | <i>DCP1A</i>        | 0,624  | 0,00309 | 0,293084 | 0,624  | 0,003019 | 0,25189 |
| ENSG00000011021 | <i>CLCN6</i>        | 0,633  | 0,00361 | 0,320056 | 0,641  | 0,003059 | 0,25486 |
| ENSG00000198074 | <i>AKR1B10</i>      | 0,994  | 0,00098 | 0,149278 | 0,824  | 0,003068 | 0,25502 |
| ENSG00000166016 | <i>ABTB2</i>        | 0,634  | 0,00454 | 0,372911 | 0,654  | 0,003122 | 0,25888 |
| ENSG00000198786 | <i>ND5</i>          | 0,609  | 0,00300 | 0,286708 | 0,606  | 0,003150 | 0,25916 |
| ENSG00000272533 | <i>SNORA28</i>      | -1,230 | 0,00316 | 0,297099 | -1,225 | 0,003162 | 0,25916 |
| ENSG00000117335 | <i>CD46</i>         | 0,572  | 0,00613 | 0,444932 | 0,614  | 0,003222 | 0,26219 |
| ENSG00000147606 | <i>SLC26A7</i>      | 0,736  | 0,00689 | 0,472689 | 0,789  | 0,003223 | 0,26219 |
| ENSG00000231679 | <i>HLA-DRB3</i>     | -1,396 | 0,00278 | 0,274733 | -0,949 | 0,003237 | 0,26266 |
| ENSG00000153790 | <i>C7orf31</i>      | -0,939 | 0,00603 | 0,442503 | -0,949 | 0,003237 | 0,26266 |
| ENSG00000111817 | <i>DSE</i>          | -0,598 | 0,00554 | 0,421580 | -0,634 | 0,003251 | 0,26352 |
| ENSG00000106537 | <i>TSPAN13</i>      | -0,676 | 0,00388 | 0,336538 | -0,679 | 0,003265 | 0,26386 |
| ENSG00000108784 | <i>NAGLU</i>        | -0,789 | 0,00269 | 0,270476 | -0,771 | 0,003267 | 0,26386 |
| ENSG00000198888 | <i>ND1</i>          | 0,595  | 0,00374 | 0,328558 | 0,603  | 0,003272 | 0,26386 |
| ENSG00000155729 | <i>KCTD18</i>       | -0,733 | 0,00306 | 0,290952 | -0,712 | 0,003272 | 0,26386 |
| ENSG00000167524 | <i>RSKR</i>         | 0,642  | 0,00491 | 0,392341 | 0,670  | 0,003286 | 0,26470 |
| ENSG00000207205 | <i>RNVU1-15</i>     | -1,098 | 0,00331 | 0,306180 | -1,094 | 0,003310 | 0,26629 |
| ENSG00000131845 | <i>ZNF304</i>       | 0,772  | 0,00383 | 0,333496 | 0,782  | 0,003381 | 0,27060 |
| ENSG00000282773 | <i>GOLGA8Q</i>      | -1,729 | 0,00963 | 0,553283 | -0,940 | 0,003409 | 0,27217 |
| ENSG00000196878 | <i>LAMB3</i>        | 0,633  | 0,00281 | 0,276782 | 0,617  | 0,003439 | 0,27425 |
| ENSG00000144647 | <i>POMGNT2</i>      | -0,639 | 0,00361 | 0,320056 | -0,642 | 0,003461 | 0,27517 |
| ENSG00000180891 | <i>CUEDC1</i>       | 0,681  | 0,00193 | 0,224873 | 0,638  | 0,003466 | 0,27517 |
| ENSG00000169962 | <i>TAS1R3</i>       | 0,963  | 0,00347 | 0,313111 | 0,967  | 0,003467 | 0,27517 |
| ENSG00000170381 | <i>SEMA3E</i>       | -0,922 | 0,00902 | 0,545125 | -0,971 | 0,003467 | 0,27517 |
| ENSG00000147166 | <i>ITGB1BP2</i>     | 0,830  | 0,00227 | 0,249115 | 0,790  | 0,003481 | 0,27532 |
| ENSG00000163755 | <i>HPS3</i>         | -0,650 | 0,00495 | 0,393445 | -0,664 | 0,003483 | 0,27532 |
| ENSG00000177692 | <i>DNAJC28</i>      | -1,269 | 0,00631 | 0,452129 | -1,079 | 0,003486 | 0,27532 |
| ENSG00000177042 | <i>TMEM80</i>       | 0,721  | 0,00227 | 0,249115 | 0,691  | 0,003511 | 0,27659 |
| ENSG00000138756 | <i>BMP2K</i>        | -0,648 | 0,00432 | 0,361448 | -0,654 | 0,003520 | 0,27694 |
| ENSG00000180537 | <i>RNF182</i>       | -0,757 | 0,00297 | 0,285132 | -0,744 | 0,003525 | 0,27699 |
| ENSG00000147394 | <i>ZNF185</i>       | -0,659 | 0,00803 | 0,515711 | -0,701 | 0,003547 | 0,27842 |
| ENSG00000277897 | <i>GSTT2</i>        | -1,497 | 0,00104 | 0,155576 | -0,782 | 0,003565 | 0,27950 |
| ENSG00000153814 | <i>JAZF1</i>        | -0,889 | 0,00160 | 0,200695 | -0,805 | 0,003572 | 0,27952 |
| ENSG00000095209 | <i>TMEM38B</i>      | -0,648 | 0,00426 | 0,358521 | -0,649 | 0,003578 | 0,27952 |
| ENSG00000189007 | <i>ADAT2</i>        | 0,623  | 0,00393 | 0,339218 | 0,628  | 0,003649 | 0,28469 |
| ENSG00000212232 | <i>SNORD17</i>      | -0,618 | 0,00349 | 0,313575 | -0,615 | 0,003692 | 0,28775 |
| ENSG00000167291 | <i>TBC1D16</i>      | -0,620 | 0,00417 | 0,353497 | -0,628 | 0,003703 | 0,28825 |
| ENSG00000252835 | <i>SCARNA21</i>     | -0,633 | 0,00513 | 0,401947 | -0,654 | 0,003717 | 0,28861 |
| ENSG00000280852 | <i>LOC653653</i>    | -0,730 | 0,00686 | 0,471847 | -0,739 | 0,003728 | 0,28878 |
| ENSG00000149948 | <i>HMGGA2</i>       | -0,599 | 0,00382 | 0,332734 | -0,599 | 0,003751 | 0,29018 |
| ENSG00000049283 | <i>EPN3</i>         | 0,679  | 0,00611 | 0,444609 | 0,709  | 0,003760 | 0,29054 |
| ENSG00000090013 | <i>BLVRB</i>        | -0,592 | 0,00850 | 0,532706 | -0,646 | 0,003765 | 0,29061 |
| ENSG00000168564 | <i>CDKN2AIP</i>     | -0,661 | 0,00437 | 0,363012 | -0,669 | 0,003771 | 0,29069 |
| ENSG00000105520 | <i>PLPPR2</i>       | -0,592 | 0,00880 | 0,543516 | -0,647 | 0,003792 | 0,29167 |
| ENSG00000091409 | <i>ITGA6</i>        | -0,569 | 0,00610 | 0,444609 | -0,599 | 0,003817 | 0,29323 |
| ENSG00000172379 | <i>ARNT2</i>        | -0,750 | 0,00229 | 0,250743 | -0,696 | 0,003826 | 0,29358 |
| ENSG00000205133 | <i>TRIQQ</i>        | -0,605 | 0,00812 | 0,520696 | -0,656 | 0,003840 | 0,29371 |
| ENSG00000007314 | <i>SCN4A</i>        | -0,900 | 0,00083 | 0,134594 | -0,762 | 0,003851 | 0,29371 |
| ENSG00000159200 | <i>RCAN1</i>        | -0,715 | 0,00302 | 0,288798 | -0,691 | 0,003858 | 0,29394 |
| ENSG00000125484 | <i>GTF3C4</i>       | 0,595  | 0,00411 | 0,349852 | 0,598  | 0,003872 | 0,29469 |
| ENSG00000162616 | <i>DNAJB4</i>       | 0,620  | 0,00350 | 0,313575 | 0,611  | 0,003906 | 0,29659 |
| ENSG00000088826 | <i>SMOX</i>         | -0,680 | 0,00877 | 0,543516 | -0,734 | 0,003929 | 0,29659 |
| ENSG00000115520 | <i>COQ10B</i>       | 0,640  | 0,00498 | 0,394261 | 0,649  | 0,003943 | 0,29659 |
| ENSG00000264585 | <i>MIR4449</i>      | -2,196 | 0,00394 | 0,339218 | -2,192 | 0,003945 | 0,29659 |
| ENSG00000232442 | <i>MHENCR</i>       | 1,153  | 0,00201 | 0,229784 | 1,061  | 0,003948 | 0,29659 |

|                 |                   |        |         |          |        |          |         |
|-----------------|-------------------|--------|---------|----------|--------|----------|---------|
| ENSG00000071537 | <i>SEL1L</i>      | -0,582 | 0,00549 | 0,419266 | -0,603 | 0,003952 | 0,29659 |
| ENSG00000135519 | <i>KCNH3</i>      | -0,651 | 0,00340 | 0,308983 | -0,636 | 0,003983 | 0,29785 |
| ENSG00000163577 | <i>EIF5A2</i>     | 0,621  | 0,00659 | 0,460736 | 0,652  | 0,003987 | 0,29785 |
| ENSG00000143147 | <i>GPR161</i>     | -0,683 | 0,00295 | 0,284475 | -0,655 | 0,004010 | 0,29922 |
| ENSG00000130812 | <i>ANGPTL6</i>    | -1,573 | 0,00841 | 0,529056 | -1,689 | 0,004015 | 0,29924 |
| ENSG00000123908 | <i>AGO2</i>       | 0,601  | 0,00351 | 0,313897 | 0,591  | 0,004076 | 0,30306 |
| ENSG00000185338 | <i>SOCS1</i>      | 1,085  | 0,00505 | 0,398029 | 1,109  | 0,004091 | 0,30385 |
| ENSG00000161970 | <i>RPL26</i>      | 0,599  | 0,00378 | 0,330190 | 0,594  | 0,004115 | 0,30530 |
| ENSG00000197043 | <i>ANXA6</i>      | -0,600 | 0,00501 | 0,395734 | -0,603 | 0,004204 | 0,30957 |
| ENSG00000119411 | <i>BSPRY</i>      | 0,666  | 0,00320 | 0,299360 | 0,643  | 0,004214 | 0,30957 |
| ENSG00000159899 | <i>NPR2</i>       | 0,664  | 0,00653 | 0,458740 | 0,682  | 0,004219 | 0,30957 |
| ENSG00000167004 | <i>PDIA3</i>      | -0,582 | 0,00495 | 0,393445 | -0,590 | 0,004229 | 0,30957 |
| ENSG00000006606 | <i>CCL26</i>      | -2,765 | 0,00149 | 0,191813 | -2,049 | 0,004230 | 0,30957 |
| ENSG00000092929 | <i>UNC13D</i>     | 0,728  | 0,00101 | 0,152361 | 0,624  | 0,004236 | 0,30964 |
| ENSG00000148926 | <i>ADM</i>        | 0,680  | 0,00537 | 0,414746 | 0,691  | 0,004273 | 0,31129 |
| ENSG00000205111 | <i>CDKL4</i>      | 2,307  | 0,00394 | 0,339218 | 2,067  | 0,004296 | 0,31260 |
| ENSG00000116704 | <i>SLC35D1</i>    | -0,648 | 0,00333 | 0,306878 | -0,628 | 0,004313 | 0,31330 |
| ENSG00000222009 | <i>BTBD19</i>     | 0,837  | 0,00653 | 0,458740 | 0,877  | 0,004319 | 0,31330 |
| ENSG00000183091 | <i>NEB</i>        | 0,596  | 0,00694 | 0,472704 | 0,622  | 0,004322 | 0,31330 |
| ENSG00000126467 | <i>TSKS</i>       | 2,193  | 0,00433 | 0,361448 | 2,197  | 0,004327 | 0,31330 |
| ENSG00000077063 | <i>CTTNBP2</i>    | -0,861 | 0,00108 | 0,159074 | -0,740 | 0,004330 | 0,31330 |
| ENSG00000148468 | <i>FAM171A1</i>   | -0,602 | 0,00440 | 0,365041 | -0,602 | 0,004354 | 0,31439 |
| ENSG00000073910 | <i>FRY</i>        | -1,512 | 0,00109 | 0,159822 | -1,258 | 0,004416 | 0,31634 |
| ENSG00000074842 | <i>MYDGF</i>      | -0,623 | 0,00424 | 0,357121 | -0,608 | 0,004456 | 0,31747 |
| ENSG00000104936 | <i>DMPK</i>       | 0,622  | 0,00579 | 0,431875 | 0,637  | 0,004479 | 0,31843 |
| ENSG00000105298 | <i>CACTIN</i>     | 0,603  | 0,00582 | 0,433281 | 0,617  | 0,004499 | 0,31947 |
| ENSG00000159733 | <i>ZFYVE28</i>    | -0,673 | 0,00626 | 0,451684 | -0,681 | 0,004519 | 0,32054 |
| ENSG00000171824 | <i>EXOSC10</i>    | 0,584  | 0,00536 | 0,414084 | 0,593  | 0,004529 | 0,32090 |
| ENSG00000140009 | <i>ESR2</i>       | 0,927  | 0,00491 | 0,392341 | 0,914  | 0,004574 | 0,32341 |
| ENSG00000136630 | <i>HLX</i>        | -1,127 | 0,00231 | 0,251600 | -0,999 | 0,004602 | 0,32433 |
| ENSG00000135404 | <i>CD63</i>       | -0,586 | 0,00592 | 0,436538 | -0,598 | 0,004626 | 0,32498 |
| ENSG00000227533 | <i>SLC2A1-AS1</i> | -1,020 | 0,00837 | 0,528936 | -1,052 | 0,004643 | 0,32498 |
| ENSG00000175967 | <i>FLJ34503</i>   | 6,229  | 0,00464 | 0,376147 | 6,231  | 0,004643 | 0,32498 |
| ENSG00000103742 | <i>IGDCC4</i>     | -0,981 | 0,00337 | 0,308675 | -0,909 | 0,004653 | 0,32498 |
| ENSG00000168528 | <i>SERINC2</i>    | -0,704 | 0,00350 | 0,313575 | -0,668 | 0,004659 | 0,32498 |
| ENSG00000248323 | <i>LUCAT1</i>     | 0,647  | 0,00274 | 0,272638 | 0,609  | 0,004666 | 0,32498 |
| ENSG00000120137 | <i>PANK3</i>      | 0,591  | 0,00434 | 0,361708 | 0,586  | 0,004679 | 0,32547 |
| ENSG00000116017 | <i>ARID3A</i>     | 0,634  | 0,00385 | 0,334490 | 0,617  | 0,004696 | 0,32635 |
| ENSG00000181381 | <i>DDX60L</i>     | -0,595 | 0,00722 | 0,483481 | -0,618 | 0,004722 | 0,32696 |
| ENSG00000148803 | <i>FUOM</i>       | -0,766 | 0,00568 | 0,429149 | -0,760 | 0,004775 | 0,33006 |
| ENSG00000278695 | <i>GSTT2B</i>     | -1,229 | 0,00576 | 0,431074 | -0,778 | 0,004894 | 0,33794 |
| ENSG00000178607 | <i>ERN1</i>       | -0,617 | 0,00595 | 0,437028 | -0,626 | 0,004938 | 0,34024 |
| ENSG00000198715 | <i>GLMP</i>       | -0,640 | 0,00657 | 0,460021 | -0,649 | 0,004956 | 0,34105 |
| ENSG00000120149 | <i>MSX2</i>       | 0,617  | 0,00534 | 0,414004 | 0,618  | 0,004960 | 0,34105 |
| ENSG00000101986 | <i>ABCD1</i>      | 0,773  | 0,00491 | 0,392341 | 0,756  | 0,004982 | 0,34211 |
| ENSG00000101439 | <i>CST3</i>       | -0,627 | 0,00408 | 0,348007 | -0,610 | 0,005013 | 0,34321 |
| ENSG00000177565 | <i>TBL1XR1</i>    | -0,567 | 0,00617 | 0,446615 | -0,580 | 0,005019 | 0,34325 |
| ENSG00000137198 | <i>GMPR</i>       | -0,725 | 0,00897 | 0,543831 | -0,737 | 0,005040 | 0,34360 |
| ENSG00000151012 | <i>SLC7A11</i>    | 0,631  | 0,00304 | 0,289389 | 0,595  | 0,005060 | 0,34398 |
| ENSG00000203780 | <i>FANK1</i>      | 0,809  | 0,00211 | 0,236565 | 0,721  | 0,005072 | 0,34435 |
| ENSG00000246145 | <i>RRS1-AS1</i>   | 1,584  | 0,00510 | 0,400335 | 1,588  | 0,005100 | 0,34590 |
| ENSG00000110660 | <i>SLC35F2</i>    | -0,577 | 0,00593 | 0,436781 | -0,586 | 0,005138 | 0,34812 |
| ENSG00000081052 | <i>COL4A4</i>     | -0,598 | 0,00927 | 0,548190 | -0,632 | 0,005146 | 0,34822 |
| ENSG00000102580 | <i>DNAJC3</i>     | -0,595 | 0,00457 | 0,372977 | -0,585 | 0,005150 | 0,34822 |
| ENSG00000177707 | <i>NECTIN3</i>    | -0,574 | 0,00758 | 0,497704 | -0,601 | 0,005170 | 0,34842 |
| ENSG00000196890 | <i>H2BU1</i>      | -0,767 | 0,00046 | 0,089279 | -0,589 | 0,005191 | 0,34913 |

|                 |                  |        |         |          |        |          |         |
|-----------------|------------------|--------|---------|----------|--------|----------|---------|
| ENSG00000104635 | <i>SLC39A14</i>  | 0,583  | 0,00522 | 0,407110 | 0,582  | 0,005268 | 0,35212 |
| ENSG00000162490 | <i>DRAXIN</i>    | -0,917 | 0,00721 | 0,483267 | -0,900 | 0,005277 | 0,35212 |
| ENSG00000094631 | <i>HDAC6</i>     | 0,591  | 0,00514 | 0,402553 | 0,586  | 0,005279 | 0,35212 |
| ENSG00000143870 | <i>PDIA6</i>     | -0,605 | 0,00404 | 0,345342 | -0,582 | 0,005286 | 0,35221 |
| ENSG00000170421 | <i>KRT8</i>      | 0,540  | 0,00870 | 0,543066 | 0,573  | 0,005336 | 0,35486 |
| ENSG00000116667 | <i>C1orf21</i>   | -0,803 | 0,00475 | 0,382537 | -0,768 | 0,005406 | 0,35735 |
| ENSG00000143156 | <i>NME7</i>      | 0,632  | 0,00909 | 0,546266 | 0,638  | 0,005409 | 0,35735 |
| ENSG00000099251 | <i>HSD17B7P2</i> | 0,792  | 0,00506 | 0,398029 | 0,692  | 0,005418 | 0,35735 |
| ENSG00000260231 | <i>KDM7A-DT</i>  | -1,749 | 0,00276 | 0,273450 | -1,595 | 0,005464 | 0,35735 |
| ENSG00000187391 | <i>MAGI2</i>     | -1,543 | 0,00779 | 0,505555 | -1,595 | 0,005464 | 0,35735 |
| ENSG00000124493 | <i>GRM4</i>      | -0,837 | 0,00580 | 0,432209 | -0,820 | 0,005484 | 0,35735 |
| ENSG00000110092 | <i>CCND1</i>     | 0,571  | 0,00545 | 0,418404 | 0,571  | 0,005511 | 0,35860 |
| ENSG00000126091 | <i>ST3GAL3</i>   | 0,635  | 0,00956 | 0,553283 | 0,676  | 0,005514 | 0,35860 |
| ENSG00000112379 | <i>ARFGEF3</i>   | -0,620 | 0,00480 | 0,385999 | -0,605 | 0,005564 | 0,36085 |
| ENSG00000170899 | <i>GSTA4</i>     | -1,022 | 0,00588 | 0,436294 | -1,014 | 0,005565 | 0,36085 |
| ENSG00000131473 | <i>ACLY</i>      | 0,573  | 0,00549 | 0,419266 | 0,571  | 0,005599 | 0,36235 |
| ENSG00000174448 | <i>STARD6</i>    | -1,328 | 0,00258 | 0,265204 | -1,195 | 0,005649 | 0,36516 |
| ENSG00000127364 | <i>TAS2R4</i>    | 0,777  | 0,00275 | 0,272973 | 0,715  | 0,005678 | 0,36633 |
| ENSG00000070081 | <i>NUCB2</i>     | -0,633 | 0,00436 | 0,362477 | -0,605 | 0,005688 | 0,36658 |
| ENSG00000022567 | <i>SLC45A4</i>   | -0,622 | 0,00420 | 0,355129 | -0,598 | 0,005758 | 0,37000 |
| ENSG00000143797 | <i>MBOAT2</i>    | -0,600 | 0,00576 | 0,431074 | -0,596 | 0,005768 | 0,37030 |
| ENSG00000144893 | <i>MED12L</i>    | -0,627 | 0,00783 | 0,506975 | -0,635 | 0,005800 | 0,37197 |
| ENSG00000185245 | <i>GP1BA</i>     | 0,719  | 0,00526 | 0,408718 | 0,708  | 0,005856 | 0,37484 |
| ENSG00000164061 | <i>BSN</i>       | -0,649 | 0,00465 | 0,376147 | -0,629 | 0,005876 | 0,37572 |
| ENSG00000136870 | <i>ZNF189</i>    | -0,621 | 0,00590 | 0,436294 | -0,616 | 0,005923 | 0,37835 |
| ENSG00000063180 | <i>CA11</i>      | -0,761 | 0,00287 | 0,280903 | -0,680 | 0,005929 | 0,37835 |
| ENSG00000181609 | <i>OR5D1</i>     | 0,597  | 0,00638 | 0,453888 | 0,600  | 0,005973 | 0,37996 |
| ENSG00000103021 | <i>CCDC113</i>   | -0,586 | 0,00715 | 0,482430 | -0,597 | 0,005975 | 0,37996 |
| ENSG00000189045 | <i>ANKDD1B</i>   | 1,124  | 0,00835 | 0,528936 | 1,139  | 0,005993 | 0,37996 |
| ENSG00000103269 | <i>RHBDL1</i>    | 0,887  | 0,00163 | 0,204679 | 0,754  | 0,005994 | 0,37996 |
| ENSG00000137841 | <i>PLCB2</i>     | 0,706  | 0,00589 | 0,436294 | 0,690  | 0,005995 | 0,37996 |
| ENSG00000001460 | <i>STPG1</i>     | -0,611 | 0,00917 | 0,546800 | -0,635 | 0,006008 | 0,38006 |
| ENSG00000072952 | <i>MRV11</i>     | -0,606 | 0,00630 | 0,452129 | -0,603 | 0,006021 | 0,38051 |
| ENSG00000048540 | <i>LMO3</i>      | 0,904  | 0,00420 | 0,355129 | 0,870  | 0,006041 | 0,38103 |
| ENSG00000117394 | <i>SLC2A1</i>    | -0,566 | 0,00653 | 0,458740 | -0,570 | 0,006070 | 0,38217 |
| ENSG00000023608 | <i>SNAPC1</i>    | 0,606  | 0,00882 | 0,543516 | 0,625  | 0,006178 | 0,38775 |
| ENSG00000006638 | <i>TBXA2R</i>    | -0,935 | 0,00207 | 0,233746 | -0,826 | 0,006198 | 0,38826 |
| ENSG00000139644 | <i>TMBIM6</i>    | -0,585 | 0,00459 | 0,374068 | -0,564 | 0,006228 | 0,38979 |
| ENSG00000106780 | <i>MEGF9</i>     | -0,604 | 0,00735 | 0,489186 | -0,615 | 0,006252 | 0,39092 |
| ENSG00000172638 | <i>EFEMP2</i>    | 0,785  | 0,00840 | 0,529056 | 0,788  | 0,006291 | 0,39255 |
| ENSG00000154146 | <i>NRGN</i>      | -0,734 | 0,00246 | 0,259453 | -0,658 | 0,006300 | 0,39255 |
| ENSG00000113328 | <i>CCNG1</i>     | -0,577 | 0,00695 | 0,472704 | -0,581 | 0,006314 | 0,39278 |
| ENSG00000110148 | <i>CCKBR</i>     | -3,870 | 0,00079 | 0,130387 | -2,499 | 0,006393 | 0,39590 |
| ENSG00000248596 | <i>LOC643201</i> | 2,866  | 0,00119 | 0,166302 | 2,230  | 0,006393 | 0,39590 |
| ENSG00000174705 | <i>SH3PXD2B</i>  | -0,608 | 0,00495 | 0,393445 | -0,590 | 0,006442 | 0,39719 |
| ENSG00000149428 | <i>HYOU1</i>     | -0,605 | 0,00379 | 0,330624 | -0,562 | 0,006458 | 0,39763 |
| ENSG00000181577 | <i>C6orf223</i>  | 0,723  | 0,00471 | 0,379560 | 0,698  | 0,006507 | 0,40023 |
| ENSG00000173114 | <i>LRRN3</i>     | 0,752  | 0,00501 | 0,395734 | 0,730  | 0,006512 | 0,40023 |
| ENSG00000198727 | <i>CYTB</i>      | 0,560  | 0,00632 | 0,452129 | 0,558  | 0,006520 | 0,40029 |
| ENSG00000141519 | <i>CCDC40</i>    | -0,636 | 0,00734 | 0,489056 | -0,632 | 0,006552 | 0,40092 |
| ENSG00000104848 | <i>KCNA7</i>     | 1,478  | 0,00661 | 0,460736 | 1,482  | 0,006607 | 0,40092 |
| ENSG00000100439 | <i>ABHD4</i>     | 0,674  | 0,00346 | 0,312888 | 0,617  | 0,006607 | 0,40092 |
| ENSG00000156194 | <i>PPEF2</i>     | 2,784  | 0,00201 | 0,229784 | 2,131  | 0,006630 | 0,40092 |
| ENSG00000120949 | <i>TNFRSF8</i>   | -2,283 | 0,00243 | 0,256608 | -1,869 | 0,006630 | 0,40092 |
| ENSG00000177679 | <i>SRRM3</i>     | -0,628 | 0,00754 | 0,496006 | -0,627 | 0,006642 | 0,40092 |
| ENSG00000185947 | <i>ZNF267</i>    | -0,592 | 0,00640 | 0,453888 | -0,587 | 0,006661 | 0,40111 |

|                 |                     |        |         |          |        |          |         |
|-----------------|---------------------|--------|---------|----------|--------|----------|---------|
| ENSG00000102781 | <i>KATNAL1</i>      | -0,606 | 0,00637 | 0,453888 | -0,599 | 0,006736 | 0,40371 |
| ENSG00000137941 | <i>TLL7</i>         | -0,657 | 0,00237 | 0,256608 | -0,579 | 0,006770 | 0,40455 |
| ENSG00000272695 | <i>GAS6-DT</i>      | -1,229 | 0,00632 | 0,452129 | -1,192 | 0,006804 | 0,40573 |
| ENSG00000106261 | <i>ZKSCAN1</i>      | -0,557 | 0,00728 | 0,486777 | -0,561 | 0,006814 | 0,40573 |
| ENSG00000155304 | <i>HSPA13</i>       | -0,588 | 0,00606 | 0,442616 | -0,578 | 0,006829 | 0,40573 |
| ENSG00000233101 | <i>HOXB-AS3</i>     | 0,758  | 0,00497 | 0,394125 | 0,728  | 0,006855 | 0,40629 |
| ENSG00000128602 | <i>SMO</i>          | -0,659 | 0,00456 | 0,372977 | -0,619 | 0,006882 | 0,40751 |
| ENSG00000183161 | <i>FANCF</i>        | -1,288 | 0,00206 | 0,233136 | -1,063 | 0,006902 | 0,40804 |
| ENSG00000124766 | <i>SOX4</i>         | -0,552 | 0,00770 | 0,501580 | -0,559 | 0,006945 | 0,40897 |
| ENSG00000243660 | <i>ZNF487</i>       | -0,825 | 0,00745 | 0,492701 | -0,828 | 0,006955 | 0,40922 |
| ENSG00000153093 | <i>ACOXL</i>        | -0,792 | 0,00909 | 0,546266 | -0,744 | 0,006983 | 0,40984 |
| ENSG00000134709 | <i>HOOK1</i>        | -0,601 | 0,00607 | 0,442616 | -0,586 | 0,006985 | 0,40984 |
| ENSG00000140398 | <i>NEIL1</i>        | 0,684  | 0,00401 | 0,343814 | 0,631  | 0,007003 | 0,41017 |
| ENSG00000185924 | <i>RTN4RL1</i>      | -0,751 | 0,00828 | 0,525655 | -0,763 | 0,007025 | 0,41070 |
| ENSG00000119138 | <i>KLF9</i>         | -0,761 | 0,00943 | 0,553283 | -0,786 | 0,007049 | 0,41154 |
| ENSG00000213903 | <i>LTBR</i>         | 0,692  | 0,00376 | 0,328910 | 0,603  | 0,007074 | 0,41184 |
| ENSG00000149084 | <i>HSD17B12</i>     | 0,575  | 0,00750 | 0,493665 | 0,577  | 0,007101 | 0,41291 |
| ENSG00000170759 | <i>KIF5B</i>        | 0,564  | 0,00623 | 0,450118 | 0,553  | 0,007182 | 0,41613 |
| ENSG00000167315 | <i>ACAA2</i>        | -0,717 | 0,00365 | 0,322153 | -0,651 | 0,007259 | 0,41871 |
| ENSG00000006062 | <i>MAP3K14</i>      | 0,573  | 0,00821 | 0,523212 | 0,578  | 0,007304 | 0,42067 |
| ENSG00000244165 | <i>P2RY11</i>       | 0,640  | 0,00838 | 0,528936 | 0,646  | 0,007306 | 0,42067 |
| ENSG00000151320 | <i>AKAP6</i>        | -0,639 | 0,00991 | 0,562715 | -0,664 | 0,007322 | 0,42082 |
| ENSG00000250420 | <i>AACSP1</i>       | 0,674  | 0,00879 | 0,543516 | 0,679  | 0,007328 | 0,42082 |
| ENSG00000165181 | <i>SHOC1</i>        | 0,678  | 0,00909 | 0,546266 | 0,693  | 0,007368 | 0,42276 |
| ENSG00000128989 | <i>ARPP19</i>       | 0,535  | 0,00979 | 0,557372 | 0,554  | 0,007447 | 0,42515 |
| ENSG00000196154 | <i>S100A4</i>       | 0,676  | 0,00675 | 0,466781 | 0,651  | 0,007449 | 0,42515 |
| ENSG00000073756 | <i>PTGS2</i>        | -1,196 | 0,00680 | 0,468843 | -1,110 | 0,007583 | 0,43101 |
| ENSG00000101977 | <i>MCF2</i>         | 1,584  | 0,00510 | 0,400335 | 1,386  | 0,007595 | 0,43101 |
| ENSG00000040608 | <i>RTN4R</i>        | -0,660 | 0,00765 | 0,499236 | -0,657 | 0,007616 | 0,43109 |
| ENSG00000159176 | <i>CSRP1</i>        | -0,553 | 0,00913 | 0,546800 | -0,564 | 0,007741 | 0,43584 |
| ENSG00000198840 | <i>ND3</i>          | 0,552  | 0,00727 | 0,486201 | 0,547  | 0,007813 | 0,43777 |
| ENSG00000088298 | <i>EDEM2</i>        | -0,675 | 0,00423 | 0,356690 | -0,612 | 0,007840 | 0,43777 |
| ENSG00000133739 | <i>LRRCC1</i>       | -0,620 | 0,00451 | 0,371628 | -0,574 | 0,007842 | 0,43777 |
| ENSG00000100505 | <i>TRIM9</i>        | -0,630 | 0,00922 | 0,546800 | -0,633 | 0,007860 | 0,43777 |
| ENSG00000169427 | <i>KCNK9</i>        | -3,390 | 0,00788 | 0,507885 | -3,386 | 0,007880 | 0,43777 |
| ENSG00000110723 | <i>EXPH5</i>        | 0,569  | 0,00640 | 0,453888 | 0,554  | 0,007886 | 0,43777 |
| ENSG00000186591 | <i>UBE2H</i>        | 0,551  | 0,00901 | 0,545060 | 0,558  | 0,007972 | 0,44114 |
| ENSG00000104213 | <i>PDGFRL</i>       | -0,897 | 0,00568 | 0,429149 | -0,814 | 0,008000 | 0,44114 |
| ENSG00000189221 | <i>MAOA</i>         | -0,640 | 0,00974 | 0,556839 | -0,640 | 0,008008 | 0,44114 |
| ENSG00000235823 | <i>OLMALINC</i>     | 0,623  | 0,00662 | 0,460736 | 0,603  | 0,008030 | 0,44196 |
| ENSG00000167491 | <i>GATAD2A</i>      | 0,538  | 0,00950 | 0,553283 | 0,547  | 0,008267 | 0,45186 |
| ENSG00000150457 | <i>LATS2</i>        | -0,572 | 0,00817 | 0,522397 | -0,570 | 0,008331 | 0,45186 |
| ENSG00000260804 | <i>LINC01963</i>    | -0,664 | 0,00976 | 0,556927 | -0,675 | 0,008413 | 0,45250 |
| ENSG00000160172 | <i>FAM86C2P</i>     | -0,656 | 0,00821 | 0,523212 | -0,609 | 0,008424 | 0,45250 |
| ENSG00000233493 | <i>TMEM238</i>      | -0,906 | 0,00837 | 0,528936 | -0,899 | 0,008431 | 0,45250 |
| ENSG00000106066 | <i>CPVL</i>         | -0,630 | 0,00574 | 0,430266 | -0,590 | 0,008457 | 0,45318 |
| ENSG00000204934 | <i>ATP6V0E2-AS1</i> | -0,832 | 0,00696 | 0,472704 | -0,807 | 0,008565 | 0,45625 |
| ENSG00000162738 | <i>VANGL2</i>       | 0,864  | 0,00923 | 0,546800 | 0,850  | 0,008578 | 0,45625 |
| ENSG00000184731 | <i>FAM110C</i>      | -0,651 | 0,00816 | 0,522045 | -0,643 | 0,008609 | 0,45715 |
| ENSG00000117984 | <i>CTSD</i>         | -0,570 | 0,00978 | 0,557372 | -0,577 | 0,008711 | 0,46143 |
| ENSG00000177570 | <i>SAMD12</i>       | -0,776 | 0,00629 | 0,452129 | -0,742 | 0,008718 | 0,46145 |
| ENSG00000141579 | <i>ZNF750</i>       | 0,765  | 0,00884 | 0,543516 | 0,760  | 0,008799 | 0,46416 |
| ENSG00000140853 | <i>NLRC5</i>        | 0,666  | 0,00593 | 0,436781 | 0,615  | 0,008857 | 0,46416 |
| ENSG00000132965 | <i>ALOX5AP</i>      | 5,912  | 0,00894 | 0,543516 | 5,914  | 0,008941 | 0,46416 |
| ENSG00000270419 | <i>CAHM</i>         | 5,912  | 0,00894 | 0,543516 | 5,914  | 0,008941 | 0,46416 |
| ENSG00000184502 | <i>GAST</i>         | 6,079  | 0,00894 | 0,543516 | 6,081  | 0,008941 | 0,46416 |



|                 |                  |        |         |          |        |          |         |
|-----------------|------------------|--------|---------|----------|--------|----------|---------|
| ENSG00000258602 | <i>LINC01629</i> | 6,079  | 0,00894 | 0,543516 | 6,081  | 0,008941 | 0,46416 |
| ENSG00000169258 | <i>GPRIN1</i>    | -0,563 | 0,00885 | 0,543516 | -0,560 | 0,008979 | 0,46501 |
| ENSG00000111057 | <i>KRT18</i>     | 0,554  | 0,00729 | 0,486812 | 0,538  | 0,009080 | 0,46903 |
| ENSG00000188064 | <i>WNT7B</i>     | -0,642 | 0,00701 | 0,475131 | -0,620 | 0,009086 | 0,46903 |
| ENSG00000101782 | <i>RIOK3</i>     | -0,584 | 0,00690 | 0,472689 | -0,558 | 0,009138 | 0,47016 |
| ENSG00000178809 | <i>TRIM73</i>    | 0,748  | 0,00396 | 0,340301 | 0,600  | 0,009250 | 0,47298 |
| ENSG00000163754 | <i>GYG1</i>      | -0,564 | 0,00961 | 0,553283 | -0,561 | 0,009549 | 0,48380 |
| ENSG00000165169 | <i>DYNLT3</i>    | -0,586 | 0,00847 | 0,531356 | -0,570 | 0,009589 | 0,48380 |
| ENSG00000177098 | <i>SCN4B</i>     | -2,738 | 0,00961 | 0,553283 | -2,734 | 0,009611 | 0,48380 |
| ENSG00000083817 | <i>ZNF416</i>    | 2,507  | 0,00961 | 0,553283 | 2,511  | 0,009611 | 0,48380 |
| ENSG00000117152 | <i>RGS4</i>      | -1,874 | 0,00663 | 0,460736 | -1,725 | 0,009626 | 0,48380 |
| ENSG00000114757 | <i>PEX5L</i>     | 0,733  | 0,00768 | 0,501041 | 0,707  | 0,009717 | 0,48648 |
| ENSG00000144369 | <i>FAM171B</i>   | -0,598 | 0,00744 | 0,492701 | -0,573 | 0,009839 | 0,49051 |
| ENSG00000143494 | <i>VASH2</i>     | 0,905  | 0,00992 | 0,562715 | 0,909  | 0,009920 | 0,49248 |
| ENSG00000151917 | <i>BEND6</i>     | -0,918 | 0,00764 | 0,499236 | -0,878 | 0,009959 | 0,49267 |
| ENSG00000101003 | <i>GINS1</i>     | 0,523  | 0,01411 | 0,671773 | 0,545  | 0,010261 | 0,49782 |
| ENSG00000280549 | <i>PADI3</i>     | -1,090 | 0,00868 | 0,542211 | -0,758 | 0,013567 | 0,58917 |

**Supplementary Table S5.** Genes altered in common by silencing *ZNF518B*, *EHMT2* and *EZH2* in HCT116 cells, using a p-value < 0.01

| Intersection     | Number of genes | Gene Symbol                                                                                                                                                                                                                                                                                                                                                                                                                                                                                                                                                                                                                                                                                                                                                                                                                                                                                                                                                                                                                                                                                                                                                                                                                                                                                                                                                                                                                                                                                                                                                                                                                                                                                                                                                                                                                                                                                                                                                                                                                                                                                                                                                                                                                                                                             |
|------------------|-----------------|-----------------------------------------------------------------------------------------------------------------------------------------------------------------------------------------------------------------------------------------------------------------------------------------------------------------------------------------------------------------------------------------------------------------------------------------------------------------------------------------------------------------------------------------------------------------------------------------------------------------------------------------------------------------------------------------------------------------------------------------------------------------------------------------------------------------------------------------------------------------------------------------------------------------------------------------------------------------------------------------------------------------------------------------------------------------------------------------------------------------------------------------------------------------------------------------------------------------------------------------------------------------------------------------------------------------------------------------------------------------------------------------------------------------------------------------------------------------------------------------------------------------------------------------------------------------------------------------------------------------------------------------------------------------------------------------------------------------------------------------------------------------------------------------------------------------------------------------------------------------------------------------------------------------------------------------------------------------------------------------------------------------------------------------------------------------------------------------------------------------------------------------------------------------------------------------------------------------------------------------------------------------------------------------|
| siEZH2 & siEHMT2 | 326             | <p> <i>ABCA3, ABHD12B, ABHD4, ABTB2, ACSS2, AIDA, AKR1B10, ALOX5AP, AMDHD1, ANXA6, APLP2, APOBEC3B, APP, ARHGEF40, ARID3B, ARL14, ARL3, ATP10D, ATP2A3, ATP2B2, ATP8B2, BCO2, BIRC3, BMP5, C1orf21, C1orf61, CACNB3, CACNG7, CAPN2, CCDC3, CCDC71L, CCND1, CCNG1, CD24, CD276, CD63, CD99, CDK8, CDKN2B, CEMIP2, CENPW, CFAP70, CHPF, CHRN1, CILP2, CNIH2, CNTN1, COL12A1, COL4A1, CORIN, CORO6, CPE, CPLX1, CPVL, CR2, CREB3L2, CRLF1, CSRP1, CST3, CXCL16, CYFIP2, CYP4F11, CYP4F2, CYP4F3, CYSTM1, DIPK1A, DNAJC3, DNAJC9-AS1, DOC2B, DPP4, DPYSL5, DTX4, DUSP6, DYNLT3, EGFR, EGR1, EGR3, EID3, ELF3, EME2, EML1, ERO1B, ETNK2, EXT2, FAM171A1, FAM171B, FAM8A1, FANCF, FANK1, FBN1, FDFT1, FDPS, FER1L4, FGF2, FGFBP1, FLG, FLG-AS1, FLJ34503, FLOT2, FNDC3B, FOXD3-AS1, FRAS1, FRZB, FUCA1, FUOM, FXYD5, FYCO1, GABRD, GAL3ST4, GAS6, GAST, GCAT, GCLC, GDAP2, GLI2, GMPR, GNG4, GPR157, GRM4, GSTT2, GXYLT2, GYG1, HAPLN3, HDAC6, HEPH, HIP1, HKDC1, HLA-B, HLA-C, HMGA2, HMGCS1, HNF4G, HOOK1, HPCAL4, HPD, HPRT1, HPS3, HRNR, IFI6, IGF2BP2, IGSF3, IL31RA, IL6ST, INSIG1, ITGA2, ITGA6, ITGB1BP2, JAZF1, JUN, JUND, KCND1, KCTD12, KIF21B, KITLG, KLF15, KLF9, KRT80, LICAM, LAMA3, LAMB3, LAMP2, LATS2, LEAP2, LIMD2, LINGO1, LMO3, LOC101928994, LOC101929705, LOC105371664, LOC339685, LOC400499, LOC653653, LOXL2, LRRCCI, LRRN3, LSS, LTB4R2, LUCAT1, LYPD6, LYSDM2, MALAT1, MALL, MAP1LC3B, MAP2, MAP3K14, MAPK8IP2, MCF2, MCUB, MDK, MEA1, MESD, MET, MLANA, MLEC, MOB4, MRPL36, MVD, NAGLU, ND4, ND5, ND6, NEAT1, NEB, NECTIN3, NFKBIA, NKX6-1, NOTUM, NPC1, NPIP11, NPR2, NPTXR, NUCB2, OGDHL, OLFML2B, OLMALINC, OR51B6, OR52D1, P2RY11, PALM3, PANX2, PDGFRL, PDIA3, PDIA4, PDIA6, PEG10, PHOSPHO1, PIK3AP1, PIMI, PLAAT3, POMGNT2, PDPDF, PPP2R2C, PROCR, PROZ, PTTG1IP, RAB15, RBP1, RCAN1, RCN3, RFFL, RFK, RNASE1, RNF135, RNF182, RNF207, RSKR, RTN4R, RTN4RL2, RUSC1-AS1, S100A2, S100A3, SAT1, SCAMP5, SCARNA21, SCARNA5, SCARNA7, SCARNA9, SCN3A, SCNN1A, SDC1, SDF2L1, SEC24D, SEL1L, SELENON, SEMA3E, SEPTIN3, SERINC2, SERP1, SEZ6L2, SFN, SLAIN2, SLC25A22, SLC26A7, SLC2A1, SLC35B1, SLC35D1, SLCO2B1, SMARCD1, SNN, SNX24, SQOR, SRP14-AS1, SRRM3, ST3GAL3, ST6GAL1, STARD13, STRADB, SURF4, TAS2R4, TBL1XR1, TGFBI, TGFBR1, TMC01, TMEM37,</i> </p> |

|                                             |    |                                                                                                                                                                                                                                                                                                                                                                                                                                                                      |
|---------------------------------------------|----|----------------------------------------------------------------------------------------------------------------------------------------------------------------------------------------------------------------------------------------------------------------------------------------------------------------------------------------------------------------------------------------------------------------------------------------------------------------------|
|                                             |    | <i>TMEM38B, TMEM45A, TMEM80, TMOD2, TMPRSS9, TNFRSF8, TRIM73, TRIQK, TSPAN13, TSPAN18, TSPAN5, TTYH3, TXNDC5, TXNRD3, UBAP1L, UPP1, UQCR10, UST, VANGL1, VANGL2, VEGFA, WFS1, ZBED2, ZCCHC14, ZCCHC24, ZFP36L1, ZNF185, ZNF267, ZNF41, ZNF585B, ZNF750, ZNF804A</i>                                                                                                                                                                                                  |
| <i>siEHMT2 &amp; siZNF518B</i>              | 28 | <i>ADM, AGO2, C5AR1, DHRS3, EIF5A2, EXPH5, GINS1, GNAZ, KCTD2, KRTAP2-3, LGALS1, MEF2C, MSRB3, NAV3, NIP7, NR4A2, PADI3, PAX2, PLA2G7, PNPLA3, RAB8B, SETSIP, SLC39A14, SLC6A17, SOBP, STMN3, TMTC1, ZNF503</i>                                                                                                                                                                                                                                                      |
| <i>siEZH2 &amp; siZNF518B</i>               | 61 | <i>ABCC3, ABHD10, ACVR1C, AGPAT5, AOC2, ARHGAP29, ATL3, ATP11C, BCL2L1, C22orf46, CA13, CAMK2D, CCNE1, CDK6, CHAC1, CRABP2, CREB5, CRIM1, CTSC, CYBRD1, DCLK1, F2RL1, GDA, HOXB6, IL1RAP, KLF2, LETM2, MAMDC2, MBNL3, MOB1A, NEDD4, NETO2, NIPAL2, NR6A1, PAPSS2, PARM1, PCGF5, RAB37, RALGPS2, RAPGEF1, RGS5, SESN3, SHTN1, SLC27A6, SLC7A8, SNAI2, SNX7, ST8SIA6, SUMO3, SYTL2, TACCI, TGM2, TMOD1, TNIK, TNS4, TOM1L2, TOMM34, TRIM14, TWSG1, UBASH3B, ZDHHC2</i> |
| <i>siEZH2 &amp; siEHMT2 &amp; siZNF518B</i> | 29 | <i>ADAM19, ANTXR2, AXIN2, BMP2K, CAPN6, CLDN4, DDAH1, DKK1, ELK3, FBXO21, HLA-DRA, HOXB-AS3, LRRC8B, NRP1, NT5E, PCTP, RGS4, S100A14, S100A4, SCD5, SLC16A7, SLC22A17, SMAD6, SRPX, TGFB1, TMEM200A, TSPAN7, UBE2L6, VCAN</i>                                                                                                                                                                                                                                        |

**Supplementary Table S6.** Primers used for RT-qPCR

| Gene                     | Primers                 |                         |
|--------------------------|-------------------------|-------------------------|
|                          | Forward                 | Reverse                 |
| <i>ZNF518B</i> (Whole)   | GGGCCTGAGGTTGTGAAACT    | AAAACCGTGGCAAGTCCCAT    |
| <i>ZNF518B</i> (isof. 1) | GCTACAGGCAGGAATGTTACC   | CGCAGTAGGTGCATGATCCC    |
| <i>ZNF518B</i> (isof. 2) | CTGCCGGTGTTACCTGGAAT    | GCGCAGCTACTTCTTGGGT     |
| <i>ACTB</i>              | GTGCTATCCCTGTACGCCTC    | GAGGGCATAACCCCTCGTAGA   |
| <i>DDAH1</i>             | CAAAAGGACAAATCAACGAGGTG | TGTGCAGATTCAGTAGACCCAA  |
| <i>SNAI1</i>             | ACCACTATGCCGCGCTCTT     | GGTCGTAGGGCTGCTGGAA     |
| <i>CDH1</i>              | GTCAGTTCAGACTCCAGCCC    | AAATTCAGTCTGCCAGGACG    |
| <i>RBL2</i>              | GGAGGAAATTGGGACTCTCTCA  | AGACGACTCAAGCTATGCGTA   |
| <i>CREB5</i>             | TGGGACACATGATGGAGATGA   | GGTGTGCATGAAGGTGGGAA    |
| <i>SRPX</i>              | ATCAAGGTGAAGTATGGGGATGT | GTTTGACTGGCAGATCAGTAGG  |
| <i>THBS1</i>             | GCCATCCGCACTAACTACATT   | TCCGTTGTGATAGCATAGGGG   |
| <i>NRP1</i>              | ACGTGGAAGTCTTCGATGGAG   | CACCATGTGTTTCGTAGTCAGA  |
| <i>BCAM</i>              | GAGGTGCGCTTGTCTGTACC    | GCATATAATGGTCGTGGGTTCC  |
| <i>TOMM34</i>            | TGCATCAAAGATTGCACTTCAGC | GCAGCACAGTCTTATAGTCAACA |
| <i>PTBP2</i>             | TGCAGTTGGCGTGAAGAGAG    | ATGCTGCTCATATTAGAGTTCGG |
| <i>S100A14</i>           | GAGACGCTGACCCCTTCTG     | CTTGCCGCTTCTCCAATCA     |
| <i>ZDHHC2</i>            | AGCCAAGGATCTTCCCATCT    | TTCACCCATGGACAATGATG    |
| <i>PADI3</i>             | TTTGGAGATCATCGTGGTCA    | CGCAATCCAGAGAGATGTCA    |
| <i>EFNA5</i>             | AGGACTCCGTCCCAGAAGAT    | CCCATCTCTTGAACCCCTTG    |
| <i>RGS4</i>              | CTTTGATGAGGCCAAGAAGA    | TGCTGAACTCTTGGCTCCTT    |
| <i>HLTF</i>              | GTGCAATTTGCCTGGATTCT    | TAGCATGTGGCTGCTCATTC    |
| <i>KAT2B</i>             | GACTGCGATCTCCCAATGAT    | CAAACACCTGTGTGGTTTCG    |

**Supplementary Table S7.** Primers used for quantitative PCR in ChIP analyses

| Gene                | Primers               |                            |
|---------------------|-----------------------|----------------------------|
|                     | Forward               | Reverse                    |
| <i>ZDHHC2</i> p     | GGATTCACAGCCAAAAATGC  | GCAAGGAGCCTCCCTTTACT       |
| <i>ZDHHC2</i> c     | AGGTGAAGACTGCTGCACTG  | GGTCGAAACACTGGGACAAT       |
| <i>PADI3</i> p      | TACCTGTGGGGACTTGCTTC  | AGCTGAGAGCTCAGGATTGG       |
| <i>EFNA5</i> p      | CTGGCAAGAAGTGGAAGGG   | CGCAAGTCATTAACGAGGGG       |
| <i>EFNA5</i> ex     | CAGAAACACCAGCGTCAACA  | TCTCTCTGTCCCTTTGCCTG       |
| <i>EFNA5</i> c      | TACTTTTGCTCCCACACCTG  | CTCTGAAGCGCCTGGAAATC       |
| <i>EFNA5</i> c (3') | GGTGTTC AAGACCCTGATG  | GCCTTTTGGCAATCCTACTG       |
| <i>RGS4</i> c1      | CGGTCGTAGCTGGGCTATAA  | TTCGGCTTTGAGCGTACTTT       |
| <i>RGS4</i> c2      | CTGCTCTTCCCTTTCCCTCCT | CCCACCACCTATGTGACCTT       |
| <i>RGS4</i> c3      | AGAAAGAAGCCCCAAGAAGC  | AGCAGTTCCTGCTGTGAGGT       |
| <i>HLTF</i> p       | TGGGAGCAGATTCCTTTGAC  | CAAGGCTTGTGAAGTGGATG       |
| <i>HLTF</i> c       | AGCGAGACTCCGTCTCAAAA  | GCTCAGCTTTAAAGTCAAAC TAACG |
| <i>KAT2B</i> p      | CTGTAGGAGCTCGCTGGAGT  | ACACAGGAAGGGATCGATTG       |
| <i>KAT2B</i> c      | CTACCATGCCCACTCTCCAA  | TTCAGTGTGCTCTTTCTGTGC      |

p: promoter; c: control regions; ex: exon.
